# Supplementary material
Source: PubMed Central journal article supplement (PMC7586343)
Supplement: ja0c05070_si_001.pdf [file ja0c05070_si_001.pdf]

## Supporting Information

### The catalytic mechanism of aromatic nitration by cytochrome P450 TxtE: Involvement of a ferric-peroxynitrite intermediate

Savvas Louka,<sup>§,⊥,‡</sup> Sarah M. Barry,<sup>#,‡,†</sup> Derren J. Heyes,<sup>§,&</sup> M. Qadri E. Mubarak,<sup>§,⊥</sup> Hafiz Saqib Ali,<sup>§,&</sup> Lona Alkhalaf,<sup>#</sup> Andrew W. Munro,<sup>§,&</sup> Nigel S. Scrutton,<sup>\*,§,&</sup> Gregory L. Challis<sup>\*,§,#,¥</sup> and Sam P. de Visser<sup>\*,§,⊥</sup>

<sup>§</sup> The Manchester Institute of Biotechnology, The University of Manchester, 131 Princess Street, Manchester M1 7DN, United Kingdom

<sup>⊥</sup> Department of Chemical Engineering and Analytical Science, The University of Manchester, Oxford Road, Manchester M13 9PL, United Kingdom

<sup>&</sup> Department of Chemistry, The University of Manchester, Oxford Road, Manchester M13 9PL, United Kingdom

<sup>#</sup> Department of Chemistry, University of Warwick, Coventry CV4 7AL, United Kingdom

<sup>§</sup> Department of Biochemistry and Molecular Biology, Monash University, Clayton VIC 3800, Australia

<sup>¥</sup> ARC Centre for Excellence in Innovations in Peptide and Protein Science, Monash University, Clayton, VIC 3800, Australia

Corresponding author: [sam.devisser@manchester.ac.uk](mailto:sam.devisser@manchester.ac.uk)

**Part I: Experimental data.**

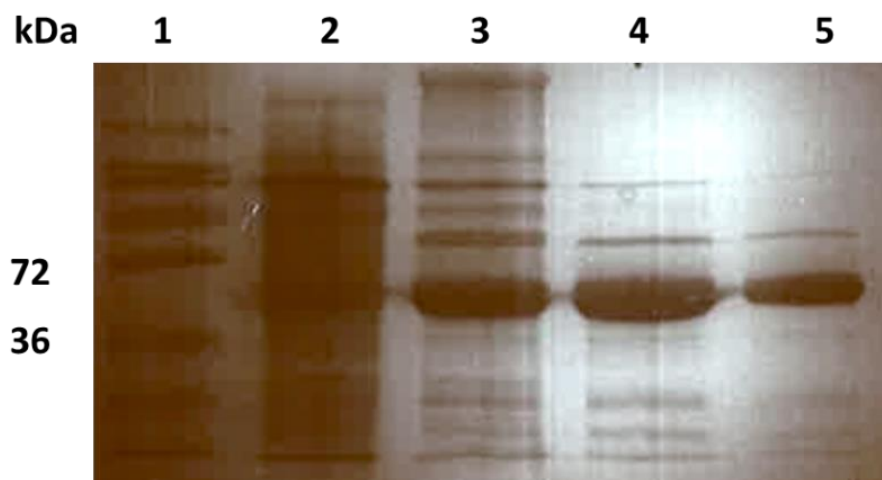

**Figure S1: Representative SDS-PAGE of purified TxtE.**

Lane 1: molecular size markers;

Lane 2: soluble protein;

Lane 3: after passing the sample through a Ni<sup>2+</sup>-IDA resin;

Lane 4: after passing the sample through a Ni<sup>2+</sup>-IDA resin using an FPLC instrument;

Lane 5: after a further gel filtration step using a Superdex 12 column (see Methods section for details).

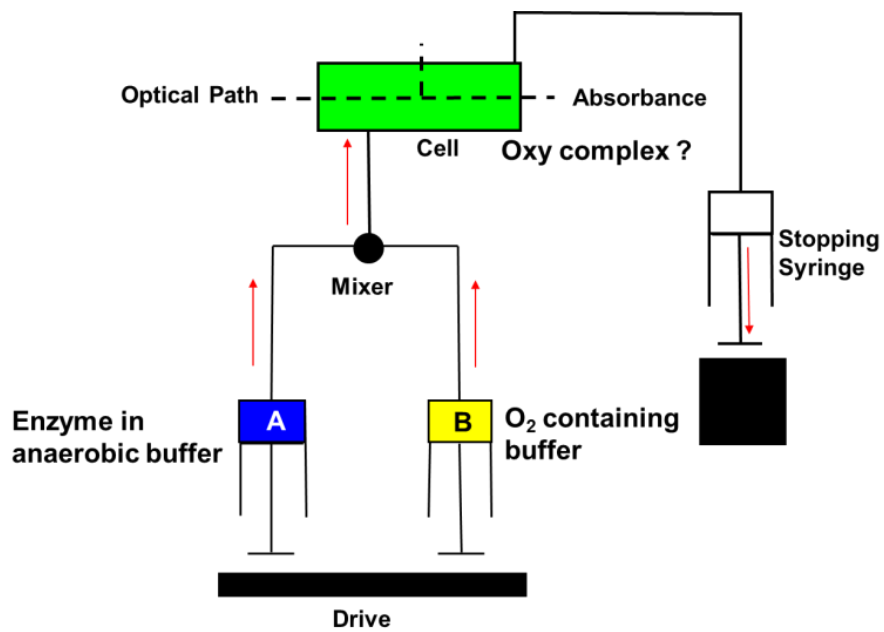

**Figure S2: Diagram of stopped-flow apparatus for single mixing experiments.** The scheme shows the mixing of enzyme against  $O_2$  but also applies to  $NO$ .

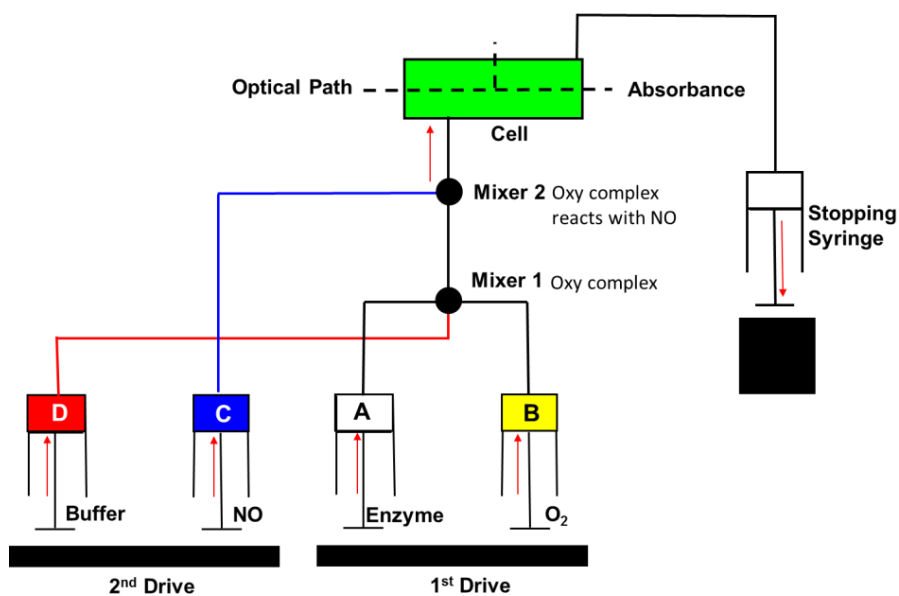

**Figure S3: Diagram of stopped-flow apparatus for double mixing experiments.** The enzyme is initially mixed against the first gas (in this case O<sub>2</sub> to form the oxy-complex), aged for a defined time delay and then mixed against the second gas (in this case NO). The order of mixing of the two gases can be varied in different stopped-slow experiments.

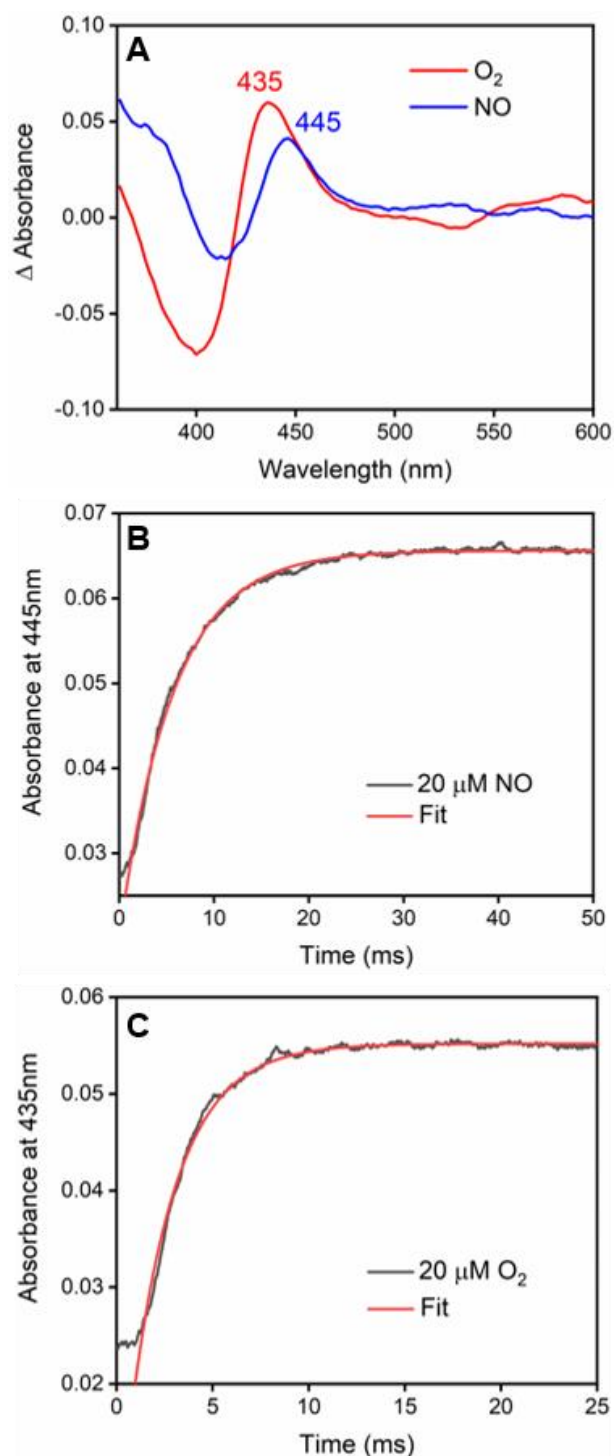

**Figure S4: Examples of rapid mixing stopped-flow data to illustrate the rates of NO and O<sub>2</sub> binding to TxtE.** A) Absorbance difference spectra measured after 50 ms from stopped-flow photodiode array experiments. A TxtE sample mixed against anaerobic buffer was used as a baseline. The maximum increases in absorbance (435 nm for O<sub>2</sub> and 445 nm for NO) were used to measure the rates of binding. Examples of kinetic transients are shown for binding of 20  $\mu$ M NO (B) and 20  $\mu$ M O<sub>2</sub> (C).

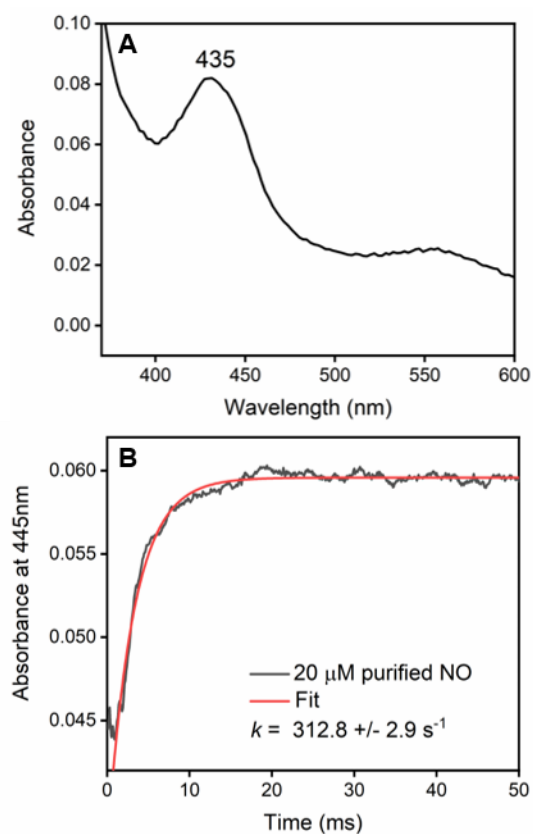

**Figure S5: Rapid mixing stopped-flow data to illustrate binding of re-purified NO to TxtE.** A) Absorbance spectra measured after 50 ms from stopped-flow photodiode array experiments. B) Example of kinetic transients at 445 nm are shown for binding of 20  $\mu$ M NO.

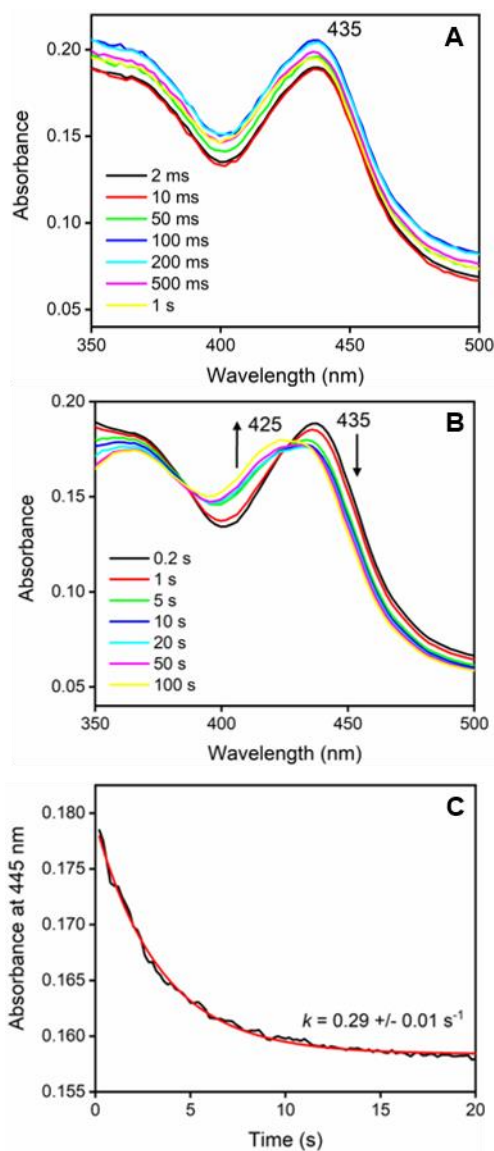

**Figure S6: Representative double mixing stopped-flow measurements where TxtE was first mixed with 20  $\mu\text{M}$  NO, aged for 50 ms and then mixed with 20  $\mu\text{M}$  O<sub>2</sub>, prior to data collection. A) Spectral changes over 1 s at selected time points show only the formation of the iron(II)-NO species at 435 nm. B) Spectral changes over 100 seconds show gradual disappearance of the iron(II)-NO species at 435 nm and formation of new peak at 425 nm. C) A kinetic transient at 445 nm showing disappearance of the iron(II)-NO species over a period of 20 s.**

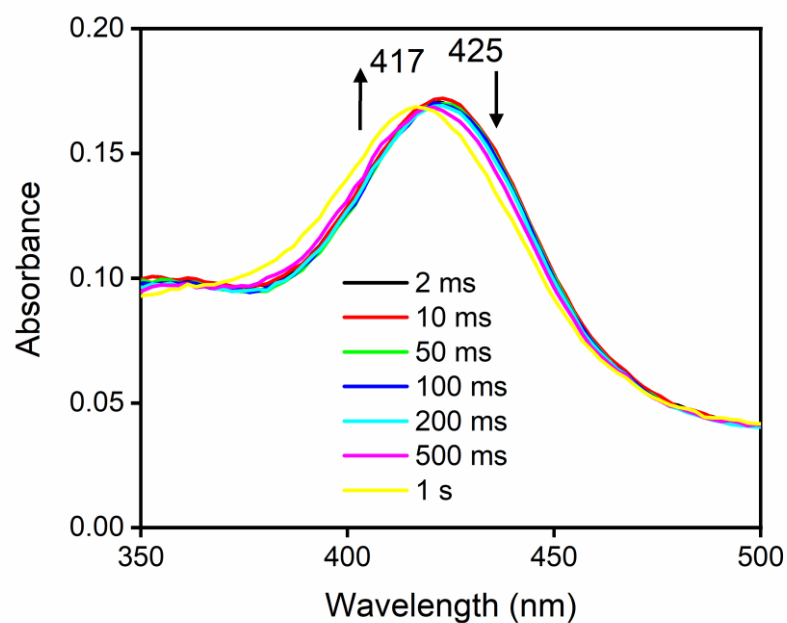

**Figure S7: Representative double mixing stopped-flow measurements where TxtE was first mixed with 20  $\mu\text{M}$   $\text{O}_2$ , aged for 50 ms and then mixed with anaerobic buffer, prior to data collection. Spectral changes over 1 s at selected time points show decay of the iron(III)-superoxo species at 425 nm and a simultaneous increase at 417 nm.**



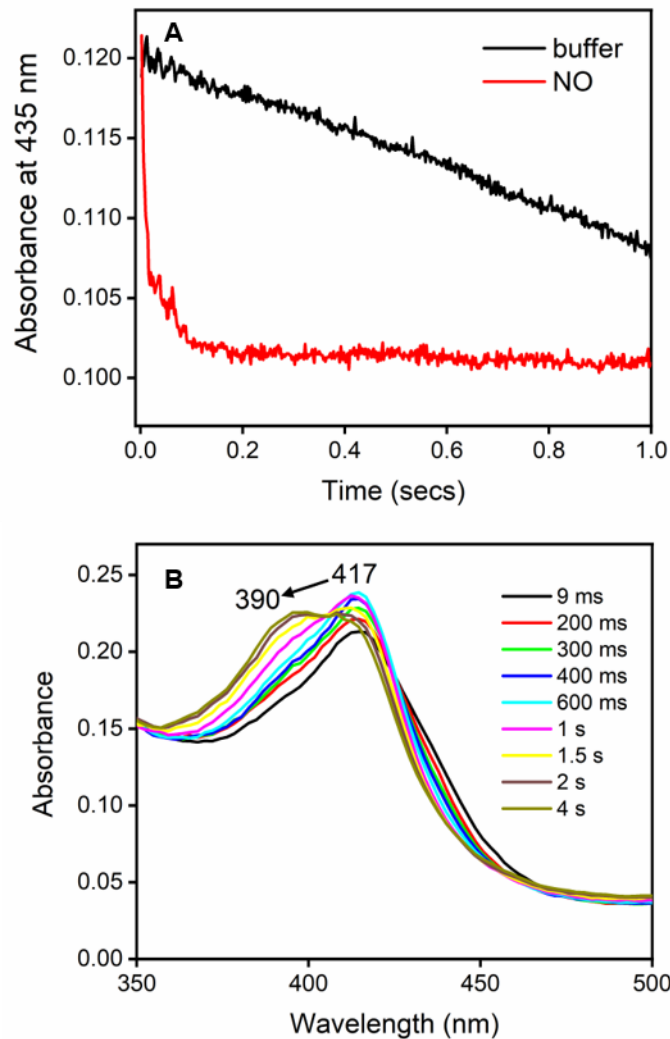

**Figure S8: Double mixing stopped-flow measurements where TxtE was first mixed with 20  $\mu\text{M}$   $\text{O}_2$ , aged for 50 ms and then mixed with either anaerobic buffer or 20  $\mu\text{M}$  NO. A) Representative transients at 435 nm from double mixing stopped-flow measurements that show the disappearance of the iron(III)-superoxo species. B) Representative double mixing stopped-flow measurements where TxtE was first mixed with 20  $\mu\text{M}$   $\text{O}_2$ , aged for 50 ms and then mixed with 20  $\mu\text{M}$  NO, prior to data collection. Spectral changes over 4 s at selected time points showing slower conversion of 417nm absorbing species to substrate-bound heme peak at 390 nm.**

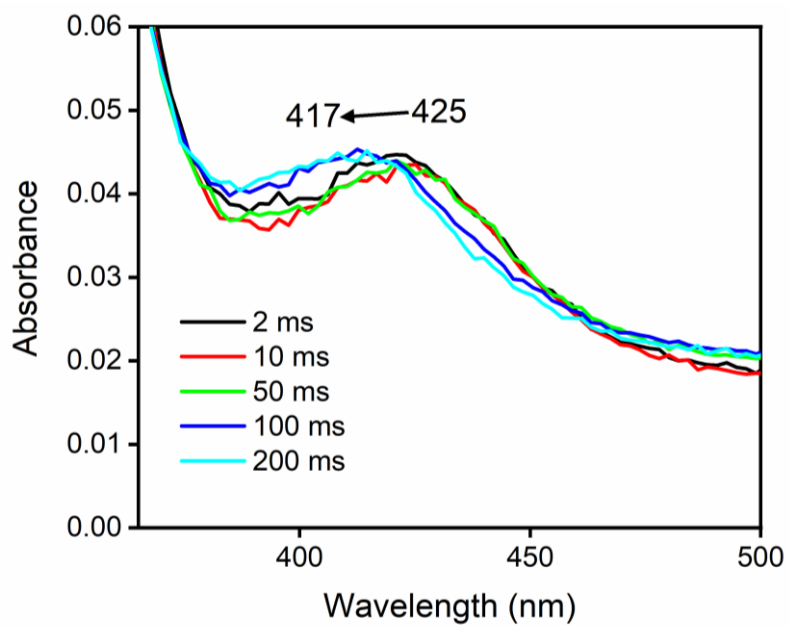

**Figure S9: Representative double mixing stopped-flow measurements where 20  $\mu\text{M}$   $\text{O}_2$  was first mixed with 20  $\mu\text{M}$   $\text{NO}$ , aged for 50 ms and then mixed with TxtE, prior to data collection. Spectral changes over 200 ms at selected time points show decay of the iron(III)-superoxo species at 425 nm and a simultaneous increase at 417 nm.**

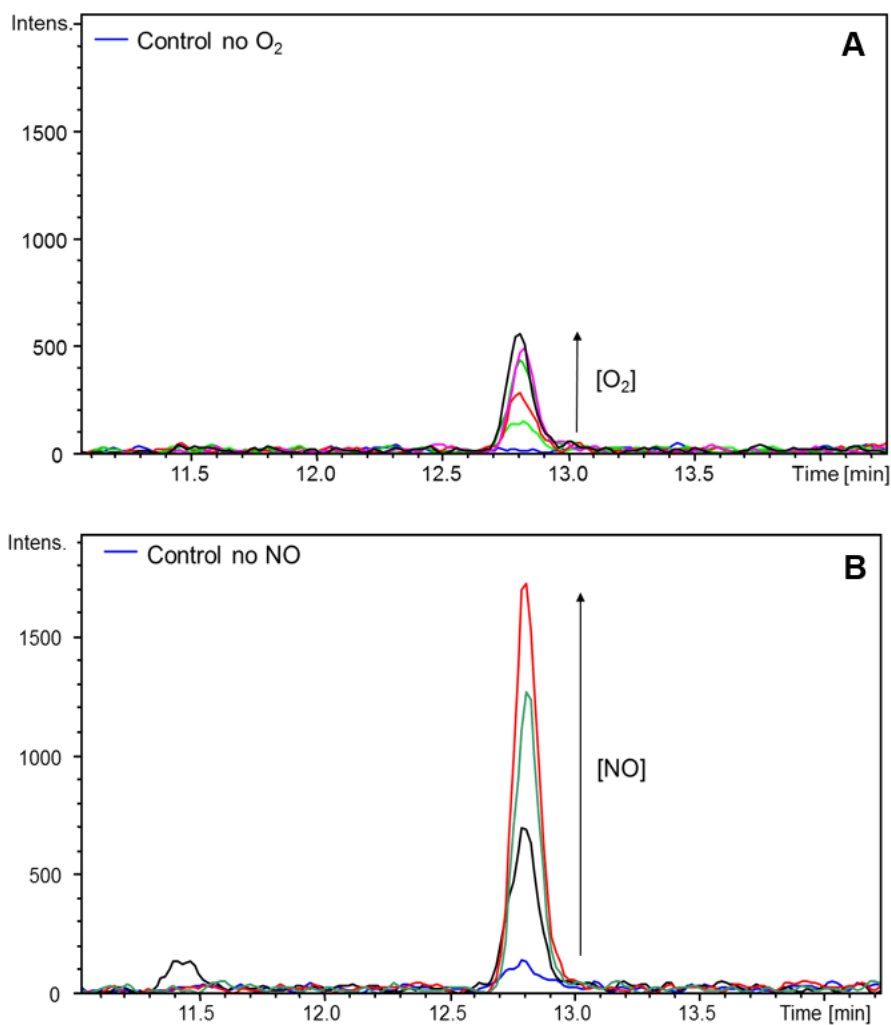

**Figure S10: A)** Representative mass spectral analysis of samples following double mixing experiments of TxtE iron(II)-NO complex reacted with buffers containing increasing concentrations of O<sub>2</sub> (0, 2, 5, 10, 20 and 100  $\mu$ M). **B)** Representative mass spectral analysis of samples following double mixing experiments of TxtE iron(III)-superoxo complex reacted with buffers containing increasing concentrations of NO (0, 20, 40 and 100  $\mu$ M). The data are LC-HRMS extracted ion chromatograms at  $m/z$  250.0800  $\pm$  0.05.

## Part II: Computational data.

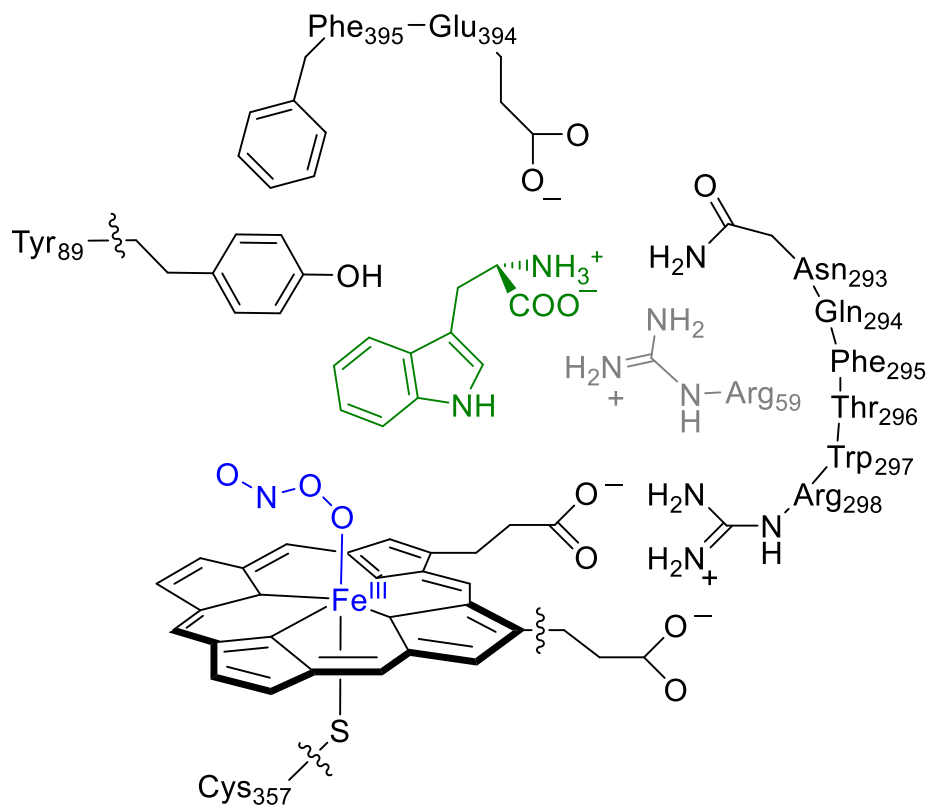

**Scheme S1: Models A and B as studied in this work. Labelling taken from the 4TPO pdb file. Model A** contains the heme without side chains,  $\text{SH}^-$  as axial ligand, peroxynitrite and Trp substrate. **Model B** has model A expanded with one propionate side chain of the heme and part of the substrate binding pocket (Arg<sub>59</sub> and Tyr<sub>89</sub> side chains, the small chain Asn<sub>293</sub>-Gln<sub>294</sub>-Phe<sub>295</sub>-Thr<sub>296</sub>-Trp<sub>297</sub>-Arg<sub>298</sub>, and Glu<sub>394</sub>-Phe<sub>395</sub>, whereby Gln<sub>294</sub> was abbreviated to Gly). Wiggly lines are where the model was cut from the crystal structure coordinates and where a hydrogen atom was added.

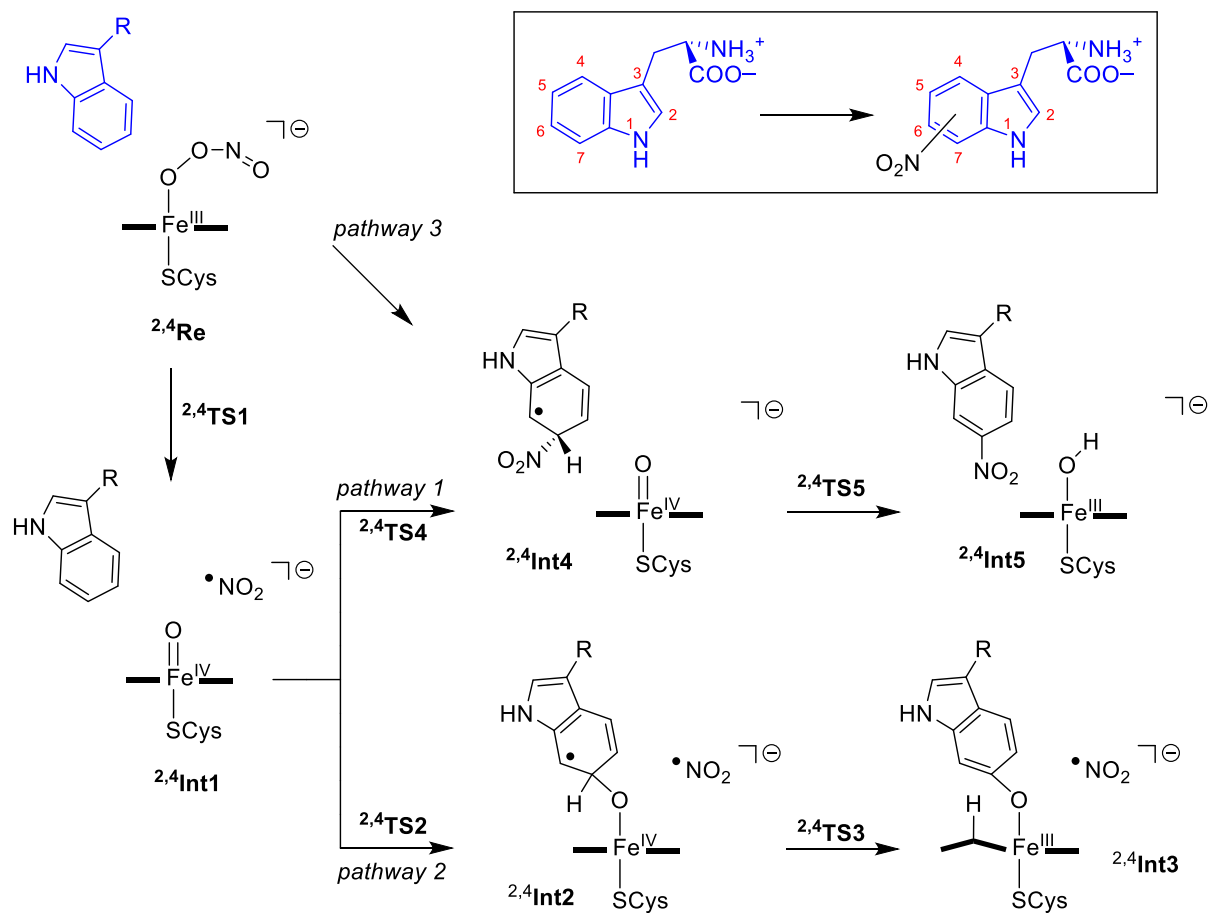

**Scheme S2: Reaction mechanisms as studied in this work with labelling of the individual local minima and transition states for C<sup>6</sup>-activation.**

## Small model A Data.

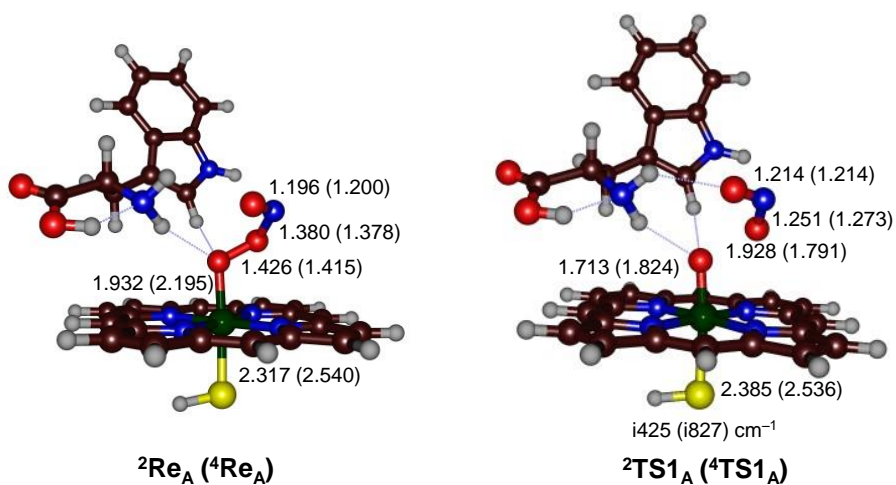

Figure S11: UB3LYP/BS1 optimized geometries of  ${}^2,4\text{Re}_A$  and  ${}^2,4\text{TS1}_A$  as obtained in Gaussian-09. Bond lengths are in angstroms and the imaginary frequency in wave numbers.

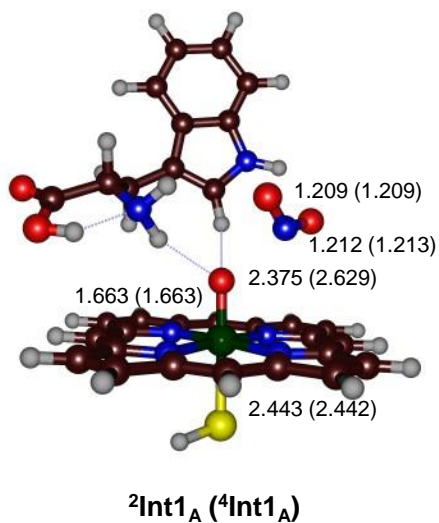

Figure S12: UB3LYP/BS1 optimized geometries of  ${}^2,4\text{Int1}_A$  as obtained in Gaussian-09. Bond lengths are in angstroms.

**Table S1: Absolute (free) energies (in au) of local minima and transition states for activation of peroxyxynitrite as calculated with B3LYP with model A in Gaussian-09.**

|                                | E            | ZPE      | G            | E            |
|--------------------------------|--------------|----------|--------------|--------------|
|                                | [BS1,au]     | [BS1,au] | [BS1,au]     | [BS2,au]     |
| <sup>2</sup> Re <sub>A</sub>   | -2477.355600 | 0.518586 | -2476.913189 | -2477.977766 |
| <sup>2</sup> TS1 <sub>A</sub>  | -2477.334388 | 0.516799 | -2476.893638 | -2477.956603 |
| <sup>2</sup> Int1 <sub>A</sub> | -2477.348699 | 0.517539 | -2476.909727 | -2477.972255 |
| <sup>4</sup> Re <sub>A</sub>   | -2477.335188 | 0.516706 | -2476.897065 | -2477.946672 |
| <sup>4</sup> TS1 <sub>A</sub>  | -2477.309364 | 0.515451 | -2476.871264 | -2477.935138 |
| <sup>4</sup> Int1 <sub>A</sub> | -2477.347933 | 0.517404 | -2476.909656 | -2477.971097 |

**Table S2: Relative (free) energies (in kcal mol<sup>-1</sup>) of local minima and transition states for activation of peroxyxynitrite as calculated with B3LYP with model A in Gaussian-09.**

|                                | $\Delta E$ | $\Delta E+ZPE$ | $\Delta G$ | $\Delta E$ | $\Delta E+ZPE$ | $\Delta G$ |
|--------------------------------|------------|----------------|------------|------------|----------------|------------|
|                                | BS1        | BS1            | BS1        | BS2        | BS2            | BS2        |
| <sup>2</sup> Re <sub>A</sub>   | 0.00       | 0.00           | 0.00       | 0.00       | 0.00           | 0.00       |
| <sup>2</sup> TS1 <sub>A</sub>  | 13.31      | 12.19          | 12.27      | 13.28      | 12.16          | 12.24      |
| <sup>2</sup> Int1 <sub>A</sub> | 4.33       | 3.67           | 2.17       | 3.46       | 2.80           | 1.30       |
| <sup>4</sup> Re <sub>A</sub>   | 12.81      | 11.63          | 10.12      | 19.51      | 18.33          | 16.82      |
| <sup>4</sup> TS1 <sub>A</sub>  | 29.01      | 27.05          | 26.31      | 26.75      | 24.78          | 24.04      |
| <sup>4</sup> Int1 <sub>A</sub> | 4.81       | 4.07           | 2.22       | 4.18       | 3.44           | 1.59       |

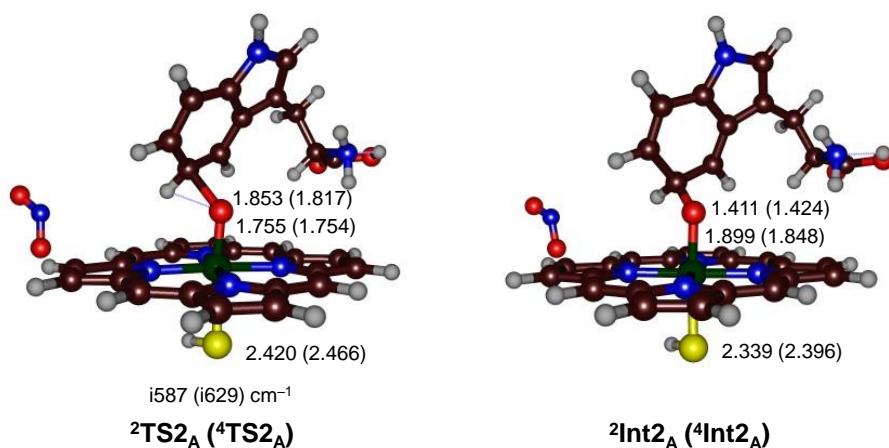

Figure S13: UB3LYP/BS1 optimized geometries of <sup>2,4</sup>TS<sub>2A</sub> and <sup>2,4</sup>Int<sub>2A</sub> as obtained in Gaussian-09. Bond lengths are in angstroms and the imaginary frequency in wave numbers.

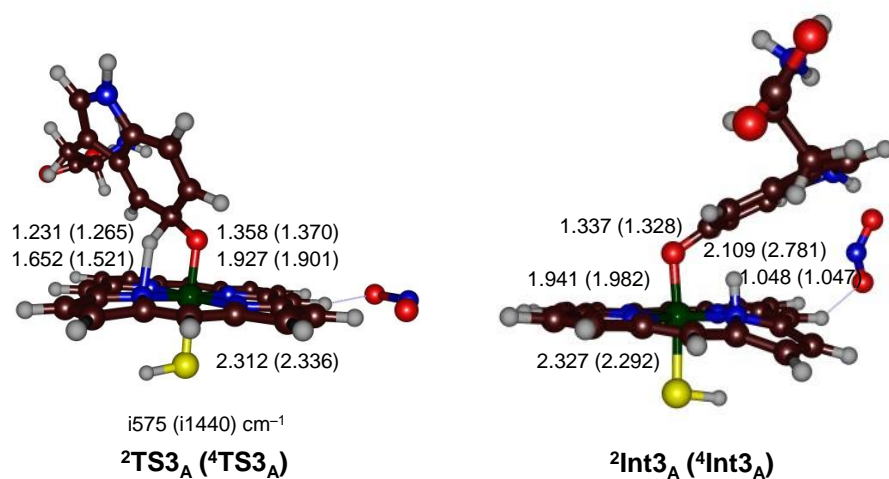

Figure S14: UB3LYP/BS1 optimized geometries of <sup>2,4</sup>TS<sub>3A</sub> and <sup>2,4</sup>Int<sub>3A</sub> as obtained in Gaussian-09. Bond lengths are in angstroms and the imaginary frequency in wave numbers.



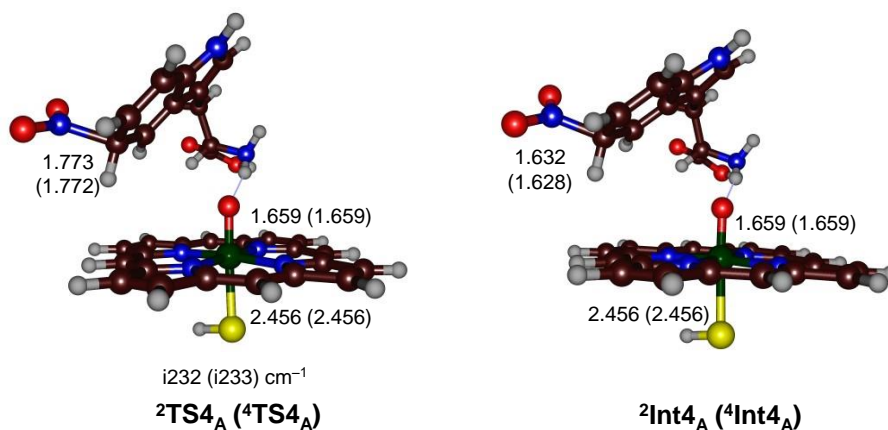

Figure S15: UB3LYP/BS1 optimized geometries of <sup>2,4</sup>TS<sub>4A</sub> and <sup>2,4</sup>Int<sub>4A</sub> as obtained in Gaussian-09. Bond lengths are in angstroms and the imaginary frequency in wave numbers.

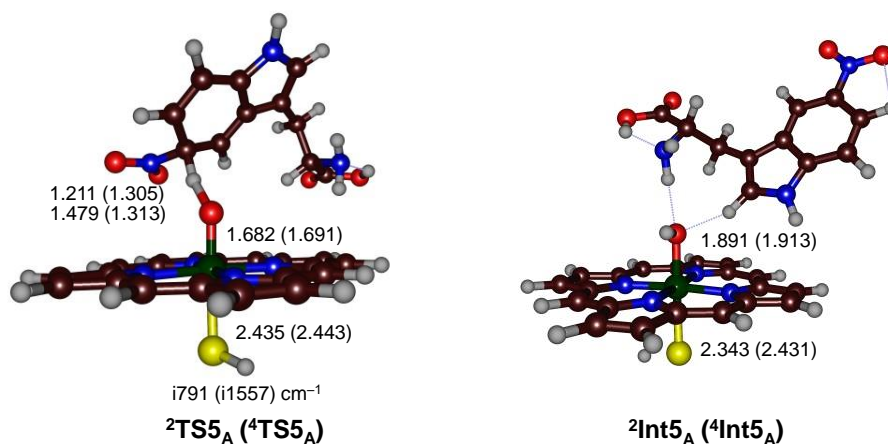

Figure S16: UB3LYP/BS1 optimized geometries of <sup>2,4</sup>TS<sub>5A</sub> and <sup>2,4</sup>Int<sub>5A</sub> as obtained in Gaussian-09. Bond lengths are in angstroms and the imaginary frequency in wave numbers.

**Table S3: Absolute (free) energies (in au) of local minima and transition states for Pathway 1 as calculated with B3LYP with model A in Gaussian-09.**

| Pathway 1:                     | E            | ZPE      | G            | E            |
|--------------------------------|--------------|----------|--------------|--------------|
|                                | [BS1,au]     | [BS1,au] | [BS1,au]     | [BS2,au]     |
| <sup>2</sup> TS2 <sub>A</sub>  | -2477.291661 | 0.515360 | -2476.855971 | -2477.933385 |
| <sup>2</sup> Int2 <sub>A</sub> | -2477.313338 | 0.516972 | -2476.875642 | -2477.967220 |
| <sup>2</sup> TS3 <sub>A</sub>  | -2477.301674 | 0.512808 | -2476.866745 | -2477.968688 |
| <sup>2</sup> Int3 <sub>A</sub> | -2477.370838 | 0.519961 | -2476.923404 | -2478.014560 |
| <sup>4</sup> TS2 <sub>A</sub>  | -2477.289667 | 0.514911 | -2476.855535 | -2477.922144 |
| <sup>4</sup> Int2 <sub>A</sub> | -2477.306212 | 0.515710 | -2476.871496 | -2477.937934 |
| <sup>4</sup> TS3 <sub>A</sub>  | -2477.274705 | 0.510352 | -2476.841094 | -2477.910412 |
| <sup>4</sup> Int3 <sub>A</sub> | -2477.337098 | 0.516594 | -2476.898687 | -2477.968318 |

**Table S4: Relative (free) energies (in kcal mol<sup>-1</sup>) of local minima and transition states for Pathway 1 as calculated with B3LYP with model A in Gaussian-09.**

|                                | $\Delta E$ | $\Delta E+ZPE$ | $\Delta G$ | $\Delta E$ | $\Delta E+ZPE$ | $\Delta G$ |
|--------------------------------|------------|----------------|------------|------------|----------------|------------|
|                                | BS1        | BS1            | BS1        | BS2        | BS2            | BS2        |
| <sup>2</sup> TS2 <sub>A</sub>  | 40.12      | 38.10          | 35.90      | 27.85      | 25.83          | 23.63      |
| <sup>2</sup> Int2 <sub>A</sub> | 26.52      | 25.51          | 23.56      | 6.62       | 5.60           | 3.66       |
| <sup>2</sup> TS3 <sub>A</sub>  | 33.84      | 30.21          | 29.14      | 5.70       | 2.07           | 1.00       |
| <sup>2</sup> Int3 <sub>A</sub> | -9.56      | -8.70          | -6.41      | -23.09     | -22.23         | -19.94     |
| <sup>4</sup> TS2 <sub>A</sub>  | 41.37      | 39.07          | 36.18      | 34.90      | 32.60          | 29.71      |
| <sup>4</sup> Int2 <sub>A</sub> | 30.99      | 29.19          | 26.16      | 25.00      | 23.19          | 20.17      |
| <sup>4</sup> TS3 <sub>A</sub>  | 50.76      | 45.60          | 45.24      | 42.27      | 37.10          | 36.74      |
| <sup>4</sup> Int3 <sub>A</sub> | 11.61      | 10.36          | 9.10       | 5.93       | 4.68           | 3.42       |

**Table S5: Absolute (free) energies (in au) of local minima and transition states for Pathway 2 as calculated with B3LYP with model A in Gaussian-09.**

| Pathway 2:                     | E            | ZPE      | G            | E            |
|--------------------------------|--------------|----------|--------------|--------------|
|                                | [BS1,au]     | [BS1,au] | [BS1,au]     | [BS2,au]     |
| <sup>2</sup> TS4 <sub>A</sub>  | -2477.306740 | 0.517517 | -2476.866469 | -2477.942997 |
| <sup>2</sup> Int4 <sub>A</sub> | -2477.307151 | 0.518460 | -2476.865556 | -2477.942251 |
| <sup>2</sup> TS5 <sub>A</sub>  | -2477.297479 | 0.514492 | -2476.856103 | -2477.933611 |
| <sup>2</sup> Int5 <sub>A</sub> | -2477.426807 | 0.521753 | -2476.978990 | -2478.053632 |
| <sup>4</sup> TS4 <sub>A</sub>  | -2477.306644 | 0.517495 | -2476.867422 | -2477.942978 |
| <sup>4</sup> Int4 <sub>A</sub> | -2477.307049 | 0.518143 | -2476.865821 | -2477.942325 |
| <sup>4</sup> TS5 <sub>A</sub>  | -2477.290360 | 0.513241 | -2476.851355 | -2477.927986 |
| <sup>4</sup> Int5 <sub>A</sub> | -2477.405500 | 0.519056 | -2476.962580 | -2478.033157 |

**Table S6: Relative (free) energies (in kcal mol<sup>-1</sup>) of local minima and transition states for Pathway 2 as calculated with B3LYP with model A in Gaussian-09.**

|                                | $\Delta E$ | $\Delta E+ZPE$ | $\Delta G$ | $\Delta E$ | $\Delta E+ZPE$ | $\Delta G$ |
|--------------------------------|------------|----------------|------------|------------|----------------|------------|
|                                | BS1        | BS1            | BS1        | BS2        | BS2            | BS2        |
| <sup>2</sup> TS4 <sub>A</sub>  | 30.66      | 29.99          | 29.32      | 21.82      | 21.15          | 20.47      |
| <sup>2</sup> Int4 <sub>A</sub> | 30.40      | 30.32          | 29.89      | 22.29      | 22.21          | 21.77      |
| <sup>2</sup> TS5 <sub>A</sub>  | 36.47      | 33.90          | 35.82      | 27.71      | 25.14          | 27.06      |
| <sup>2</sup> Int5 <sub>A</sub> | -44.68     | -42.70         | -41.29     | -47.61     | -45.62         | -44.21     |
| <sup>4</sup> TS4 <sub>A</sub>  | 30.72      | 30.04          | 28.72      | 21.83      | 21.15          | 19.83      |
| <sup>4</sup> Int4 <sub>A</sub> | 30.47      | 30.19          | 29.72      | 22.24      | 21.96          | 21.50      |
| <sup>4</sup> TS5 <sub>A</sub>  | 40.94      | 37.58          | 38.80      | 31.24      | 27.88          | 29.10      |
| <sup>4</sup> Int5 <sub>A</sub> | -31.31     | -31.02         | -30.99     | -34.76     | -34.46         | -34.44     |

**Table S7: Group spin densities and charges of local minima and transition states for activation of peroxyxynitrite as calculated with B3LYP with model A in Gaussian-09.**

Spin Densities:

|                                | Fe   | O38  | NO2   | Por   | SH    | Trp  | Total |
|--------------------------------|------|------|-------|-------|-------|------|-------|
| <sup>2</sup> Re <sub>A</sub>   | 1.01 | 0.04 | 0.00  | -0.07 | 0.03  | 0.00 | 1.00  |
| <sup>2</sup> TS1 <sub>A</sub>  | 1.14 | 0.44 | -0.49 | -0.09 | 0.00  | 0.00 | 1.00  |
| <sup>2</sup> Int1 <sub>A</sub> | 1.37 | 0.62 | -0.86 | -0.10 | -0.03 | 0.01 | 1.00  |
| <sup>4</sup> Re <sub>A</sub>   | 2.58 | 0.11 | 0.01  | -0.06 | 0.35  | 0.00 | 3.00  |
| <sup>4</sup> TS1 <sub>A</sub>  | 2.17 | 0.27 | 0.30  | -0.08 | 0.33  | 0.01 | 3.00  |
| <sup>4</sup> Int1 <sub>A</sub> | 1.28 | 0.80 | 0.87  | -0.05 | 0.09  | 0.01 | 3.00  |

Charges:

|                                | Fe   | O38   | NO2   | Por   | SH    | Trp   | Total |
|--------------------------------|------|-------|-------|-------|-------|-------|-------|
| <sup>2</sup> Re <sub>A</sub>   | 0.34 | -0.41 | -0.14 | -0.60 | -0.13 | -0.07 | -1.00 |
| <sup>2</sup> TS1 <sub>A</sub>  | 0.40 | -0.46 | -0.18 | -0.52 | -0.18 | -0.07 | -1.00 |
| <sup>2</sup> Int1 <sub>A</sub> | 0.44 | -0.55 | -0.10 | -0.49 | -0.23 | -0.08 | -1.00 |
| <sup>4</sup> Re <sub>A</sub>   | 0.50 | -0.40 | -0.19 | -0.52 | -0.29 | -0.10 | -1.00 |
| <sup>4</sup> TS1 <sub>A</sub>  | 0.51 | -0.46 | -0.22 | -0.49 | -0.25 | -0.09 | -1.00 |
| <sup>4</sup> Int1 <sub>A</sub> | 0.43 | -0.54 | -0.10 | -0.49 | -0.21 | -0.08 | -1.00 |

**Table S8: Group spin densities and charges of local minima and transition states for Pathway 1 as calculated with B3LYP with model A in Gaussian-09.**

Spin densities:

|                                | Fe   | O38  | NO2   | Por   | SH    | Trp   | Total |
|--------------------------------|------|------|-------|-------|-------|-------|-------|
| <sup>2</sup> TS2 <sub>A</sub>  | 1.05 | 0.57 | -0.63 | -0.18 | -0.06 | 0.25  | 1.00  |
| <sup>2</sup> Int2 <sub>A</sub> | 1.00 | 0.08 | -0.58 | -0.09 | 0.03  | 0.56  | 1.00  |
| <sup>2</sup> TS3 <sub>A</sub>  | 0.98 | 0.05 | -0.23 | -0.05 | 0.05  | 0.20  | 1.00  |
| <sup>2</sup> Int3 <sub>A</sub> | 0.99 | 0.06 | 0.00  | -0.07 | 0.03  | -0.01 | 1.00  |
| <sup>4</sup> TS2 <sub>A</sub>  | 0.95 | 0.64 | 0.69  | 0.00  | 0.26  | 0.46  | 3.00  |
| <sup>4</sup> Int2 <sub>A</sub> | 0.94 | 0.17 | 0.73  | 0.05  | 0.18  | 0.93  | 3.00  |
| <sup>4</sup> TS3 <sub>A</sub>  | 0.98 | 0.07 | 0.70  | 0.80  | 0.06  | 0.40  | 3.00  |
| <sup>4</sup> Int3 <sub>A</sub> | 1.04 | 0.03 | 0.84  | 1.03  | 0.03  | 0.03  | 3.00  |

Charges:

|                                | Fe   | O38   | NO2   | Por   | SH    | Trp  | Total |
|--------------------------------|------|-------|-------|-------|-------|------|-------|
| <sup>2</sup> TS2 <sub>A</sub>  | 0.35 | -0.49 | -0.34 | -0.49 | -0.20 | 0.17 | -1.00 |
| <sup>2</sup> Int2 <sub>A</sub> | 0.27 | -0.56 | -0.38 | -0.58 | -0.14 | 0.38 | -1.00 |
| <sup>2</sup> TS3 <sub>A</sub>  | 0.25 | -0.57 | -0.64 | -0.49 | -0.11 | 0.57 | -1.00 |
| <sup>2</sup> Int3 <sub>A</sub> | 0.26 | -0.58 | -0.75 | -0.31 | -0.13 | 0.53 | -1.00 |
| <sup>4</sup> TS2 <sub>A</sub>  | 0.38 | -0.50 | -0.28 | -0.54 | -0.17 | 0.10 | -1.00 |
| <sup>4</sup> Int2 <sub>A</sub> | 0.32 | -0.56 | -0.24 | -0.52 | -0.14 | 0.14 | -1.00 |
| <sup>4</sup> TS3 <sub>A</sub>  | 0.27 | -0.58 | -0.27 | -0.71 | -0.15 | 0.44 | -1.00 |
| <sup>4</sup> Int3 <sub>A</sub> | 0.27 | -0.66 | -0.16 | -0.91 | -0.11 | 0.56 | -1.00 |

**Table S9: Group spin densities and charges of local minima and transition states for Pathway 2 as calculated with B3LYP with model A in Gaussian-09.**

Spin densities:

|                                | Fe   | O38  | NO2   | Por   | SH    | Trp   | Total |
|--------------------------------|------|------|-------|-------|-------|-------|-------|
| <sup>2</sup> TS4 <sub>A</sub>  | 1.27 | 0.81 | -0.23 | -0.08 | -0.01 | -0.75 | 1.00  |
| <sup>2</sup> Int4 <sub>A</sub> | 1.27 | 0.81 | -0.11 | -0.08 | -0.01 | -0.88 | 1.00  |
| <sup>2</sup> TS5 <sub>A</sub>  | 1.24 | 0.69 | -0.05 | -0.08 | 0.00  | -0.79 | 1.00  |
| <sup>2</sup> Int5 <sub>A</sub> | 0.97 | 0.06 | 0.00  | -0.08 | 0.05  | 0.00  | 1.00  |
| <sup>4</sup> TS4 <sub>A</sub>  | 1.27 | 0.81 | 0.23  | -0.08 | 0.00  | 0.77  | 3.00  |
| <sup>4</sup> Int4 <sub>A</sub> | 1.27 | 0.81 | 0.11  | -0.08 | 0.00  | 0.90  | 3.00  |
| <sup>4</sup> TS5 <sub>A</sub>  | 1.58 | 0.60 | 0.11  | -0.10 | 0.01  | 0.80  | 3.00  |
| <sup>4</sup> Int5 <sub>A</sub> | 2.83 | 0.12 | 0.00  | 0.06  | -0.01 | 0.01  | 3.00  |

Charges:

|                                | Fe   | O38   | NO2   | Por   | SH    | Trp  | Total |
|--------------------------------|------|-------|-------|-------|-------|------|-------|
| <sup>2</sup> TS4 <sub>A</sub>  | 0.39 | -0.52 | -0.31 | -0.53 | -0.27 | 0.23 | -1.00 |
| <sup>2</sup> Int4 <sub>A</sub> | 0.39 | -0.52 | -0.31 | -0.52 | -0.27 | 0.23 | -1.00 |
| <sup>2</sup> TS5 <sub>A</sub>  | 0.39 | -0.54 | -0.30 | -0.52 | -0.25 | 0.22 | -1.00 |
| <sup>2</sup> Int5 <sub>A</sub> | 0.28 | -0.75 | -0.45 | -0.61 | -0.17 | 0.69 | -1.00 |
| <sup>4</sup> TS4 <sub>A</sub>  | 0.39 | -0.52 | -0.31 | -0.53 | -0.27 | 0.23 | -1.00 |
| <sup>4</sup> Int4 <sub>A</sub> | 0.39 | -0.52 | -0.31 | -0.53 | -0.27 | 0.24 | -1.00 |
| <sup>4</sup> TS5 <sub>A</sub>  | 0.45 | -0.60 | -0.37 | -0.45 | -0.22 | 0.20 | -1.00 |
| <sup>4</sup> Int5 <sub>A</sub> | 0.43 | -0.78 | -0.45 | -0.71 | -0.21 | 0.71 | -1.00 |

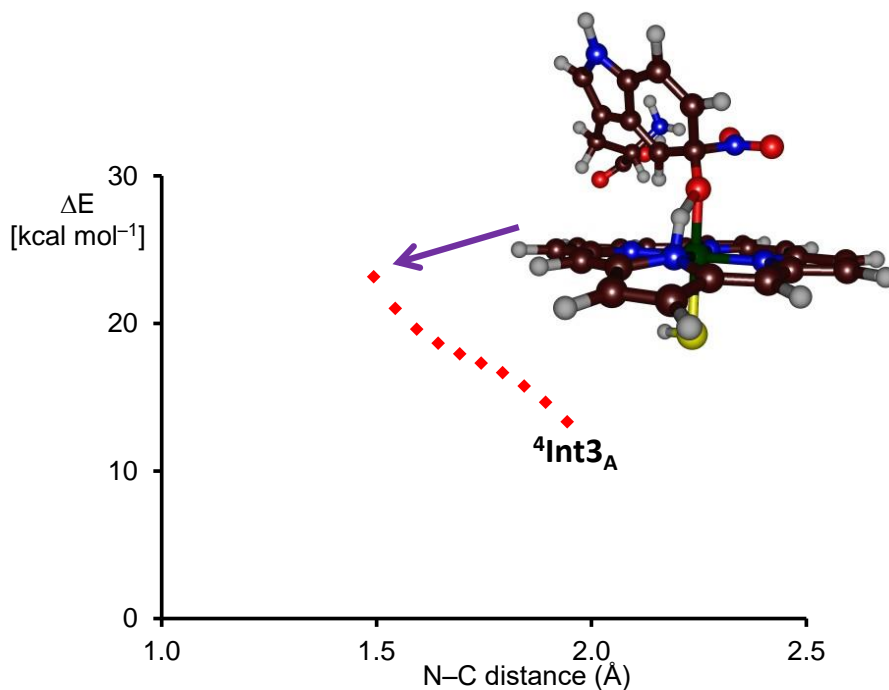

**Figure S17:** UB3LYP/BS1 geometry scan for NO<sub>2</sub> attack on the *ipso*-carbon atom of the substrate in <sup>4</sup>Int3<sub>A</sub> as obtained in Gaussian-09. All points refer to a full geometry optimization with fixed C–N distance. Energies are relative to <sup>4</sup>Re<sub>A</sub>.

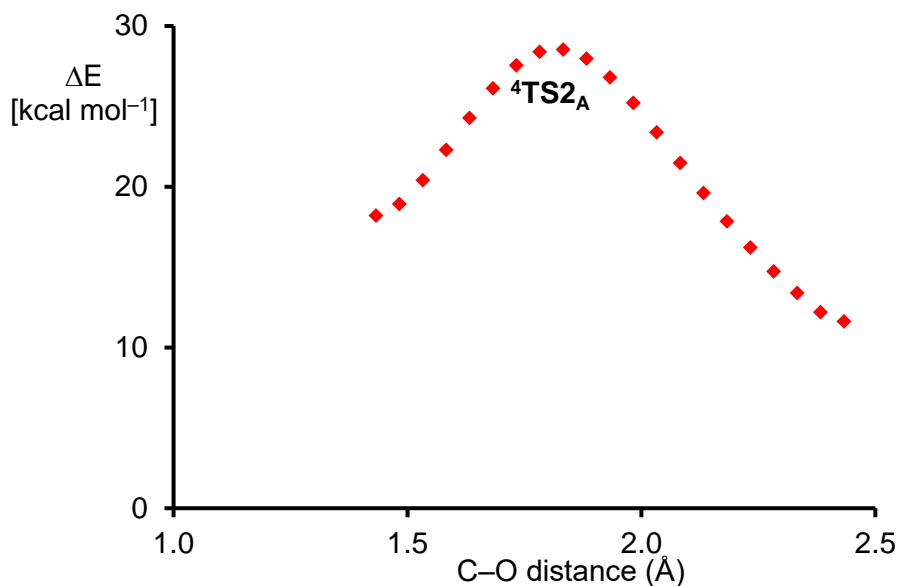

**Figure S18:** UB3LYP/BS1 geometry scan for electrophilic attack on the exo atom of the substrate starting from <sup>4</sup>Int1<sub>A</sub> as obtained in Gaussian-09. All points refer to a full geometry optimization with fixed C–O distance. Energies are relative to <sup>4</sup>Re<sub>A</sub>.

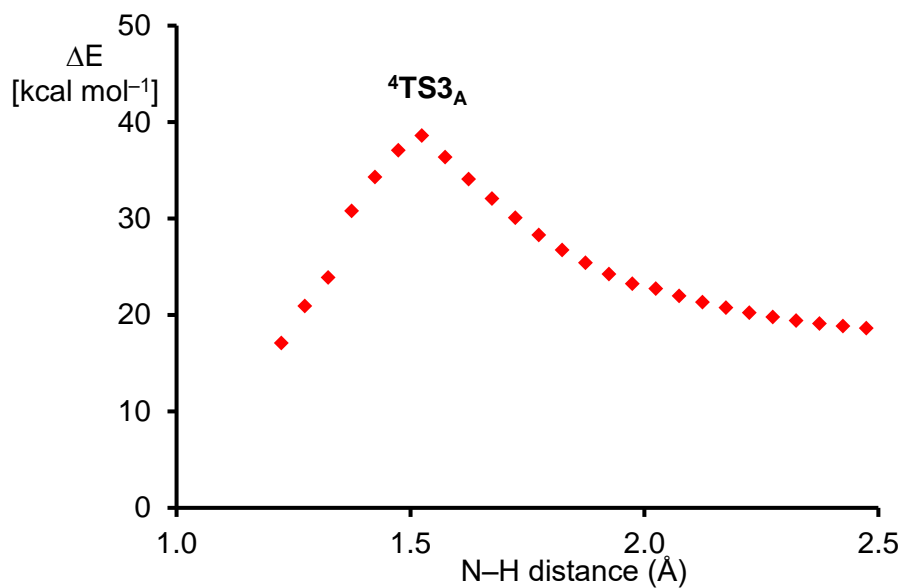

**Figure S19:** UB3LYP/BS1 geometry scan for proton transfer from the *ipso*-C–H bond of substrate in <sup>4</sup>Int<sub>2A</sub> as obtained in Gaussian-09. All points refer to a full geometry optimization with fixed H–N distance. Energies are relative to <sup>4</sup>Re<sub>A</sub>.

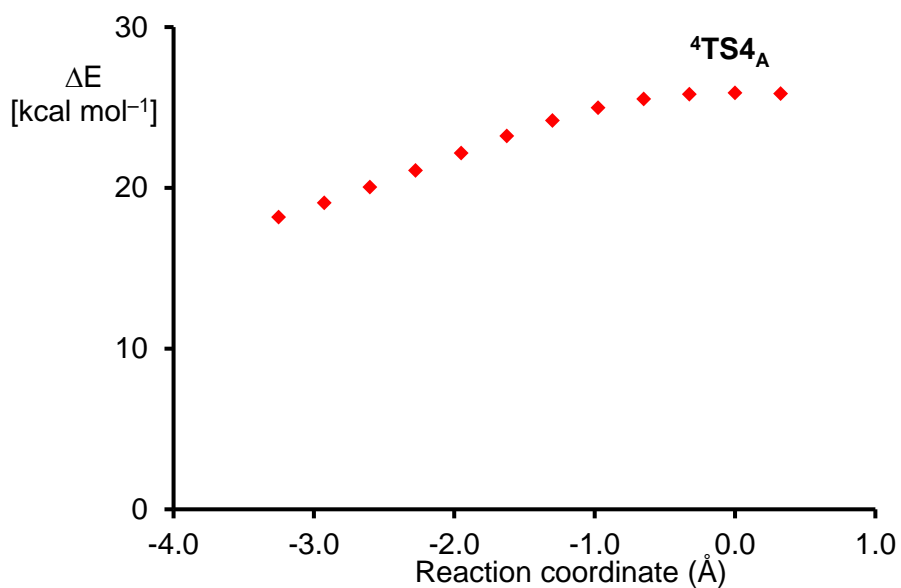

**Figure S20:** UB3LYP/BS1 calculated intrinsic reaction coordinate scan for NO<sub>2</sub> transfer to substrate in <sup>4</sup>Int<sub>1A</sub> around <sup>4</sup>TS<sub>4A</sub> as obtained in Gaussian-09. Energies are relative to <sup>4</sup>Int<sub>1A</sub>.



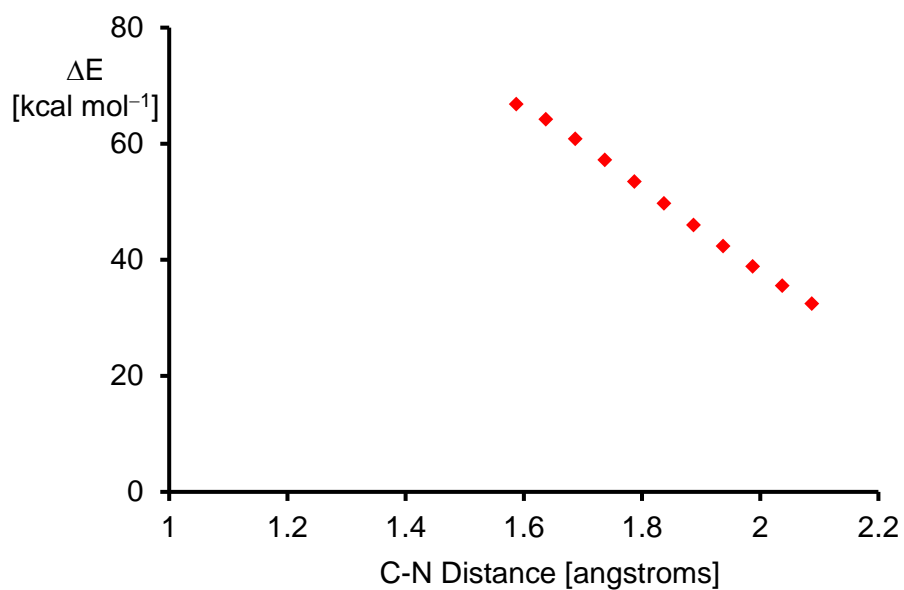

**Figure S21: UB3LYP/BS1 calculated constraint geometry scan for direct attack of peroxytrite on the substrate in <sup>4</sup>Re<sub>A</sub> as obtained in Gaussian-09. Energies are relative to <sup>4</sup>Re<sub>A</sub>.**

## Large model B Data.

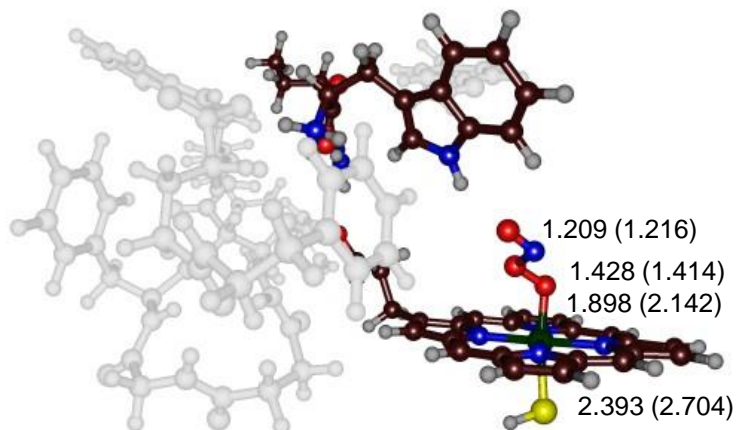

## ${}^2\text{Re}_B$ ( ${}^4\text{Re}_B$ )

Figure S22: UB3LYP/BS1 optimized geometries of  ${}^{2,4}\text{Re}_B$  as obtained in Gaussian-09. Bond lengths are in angstroms.

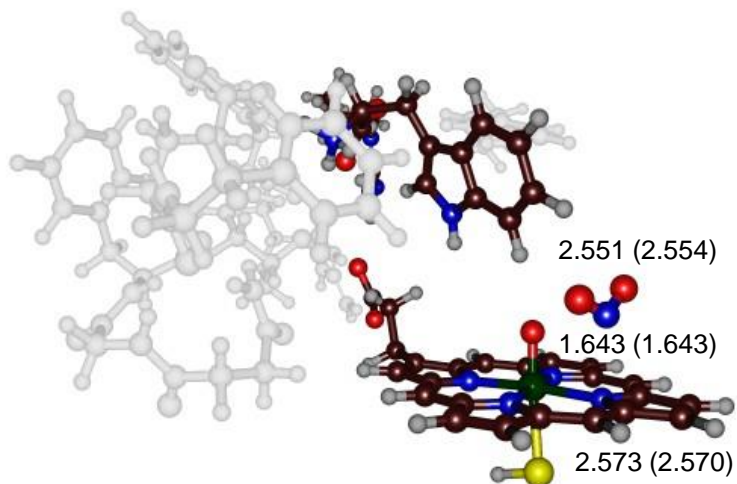

## ${}^2\text{Int1}_B$ ( ${}^4\text{Int1}_B$ )

Figure S23: UB3LYP/BS1 optimized geometries of  ${}^{2,4}\text{Int1}_B$  as obtained in Gaussian-09. Bond lengths are in angstroms.

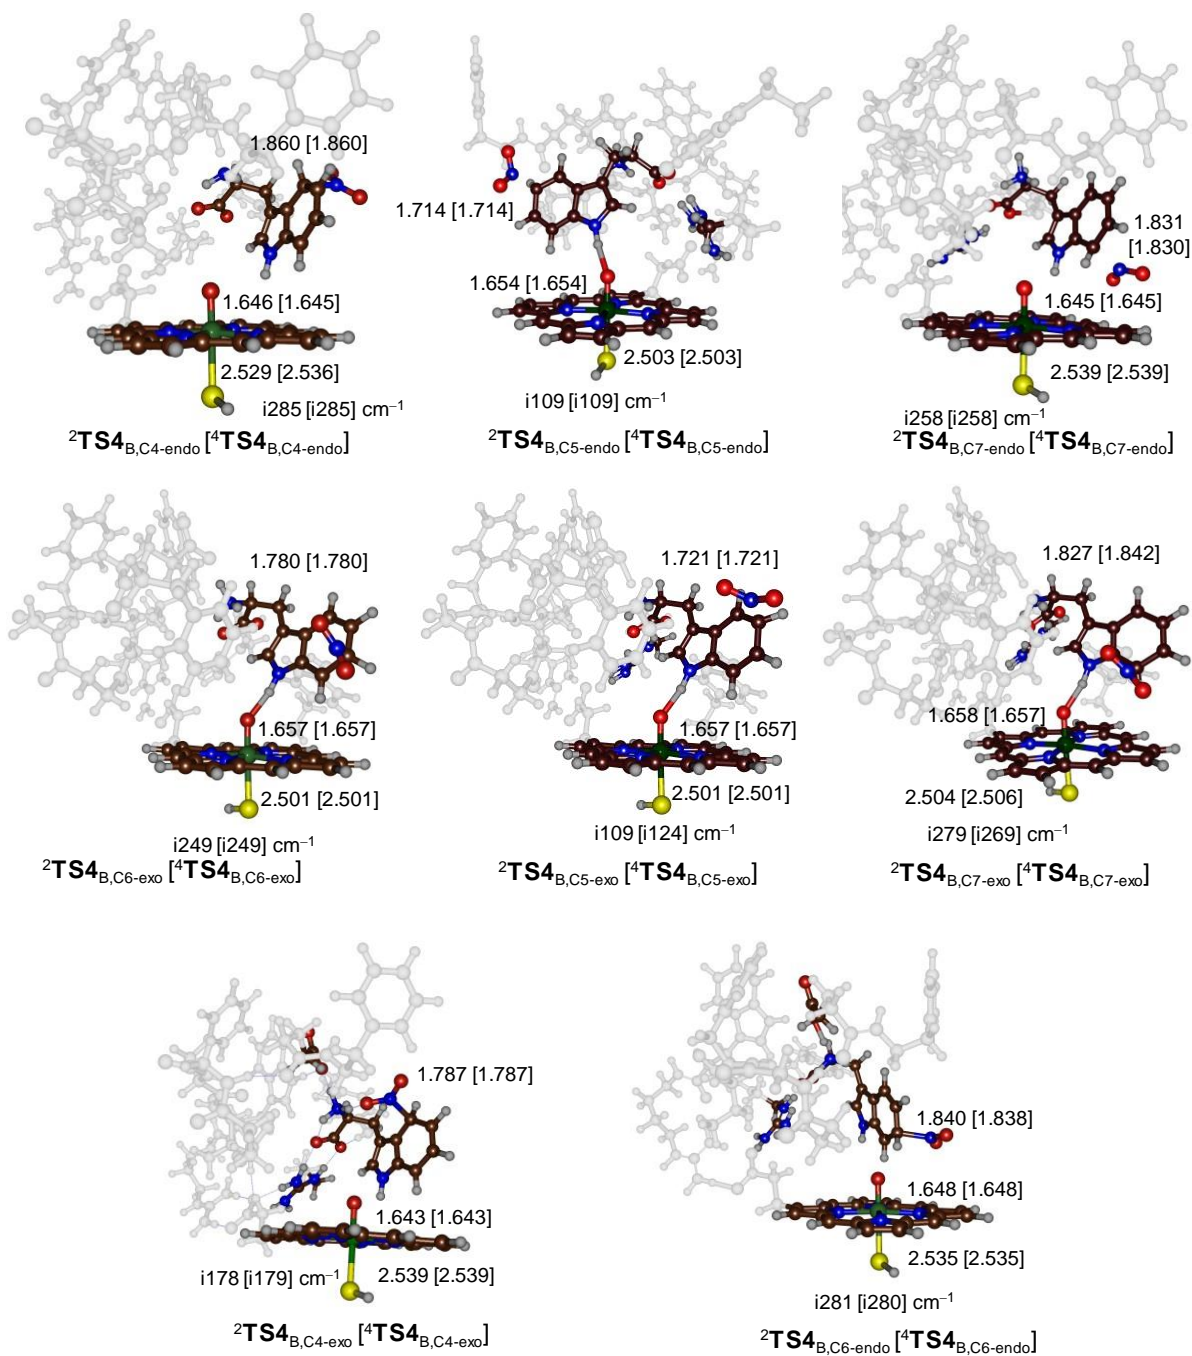

**Figure S24: UB3LYP/BS1 optimized transition state geometries for NO<sub>2</sub> attack on L-Trp substrate via  ${}^2,{}^4\text{TS4}_{\text{B}}$ . N–C bond formation barriers calculated for attack on the C<sup>4</sup>, C<sup>5</sup>, C<sup>6</sup> and C<sup>7</sup>-positions. Bond lengths are in angstroms and the imaginary frequency in the transition state in cm<sup>-1</sup>.**

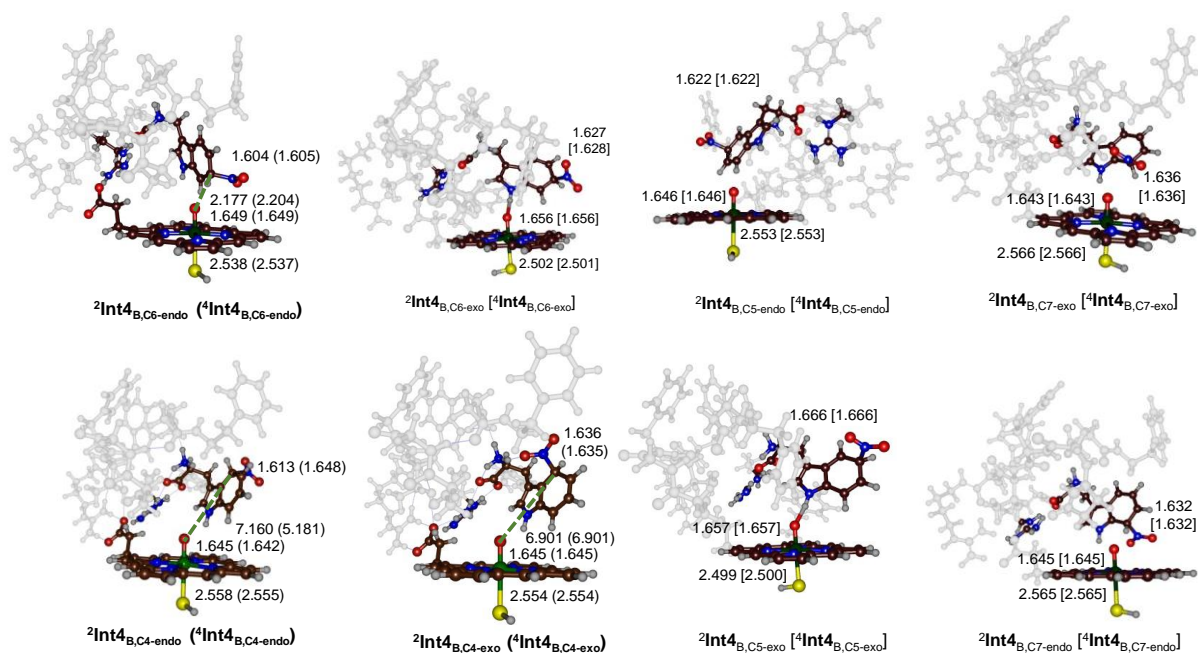

**Figure S25: UB3LYP/BS1 optimized transition state geometries for NO<sub>2</sub> attack on L-Trp substrate via <sup>2,4</sup>Int4<sub>B</sub>. N–C bond formation calculated for attack on the C<sup>4</sup>, C<sup>5</sup>, C<sup>6</sup> and C<sup>7</sup>-positions. Bond lengths are in angstroms.**

**Table S10: Absolute (free) energies (in au) of local minima and transition states for Pathway 2-C4 as calculated with B3LYP with model B in Gaussian-09.**

| Model B-C4                             | E [au]       | ZPE [au] | G [au]       | E [au]       | E <sub>disp</sub> [au] |
|----------------------------------------|--------------|----------|--------------|--------------|------------------------|
|                                        | [BS1,au]     | [BS1,au] | [BS1,au]     | [BS2,au]     | [BS2,au]               |
| ver1:                                  |              |          |              |              |                        |
| <sup>2</sup> Re <sub>B</sub>           | -6677.060921 | 2.049469 | -6675.212340 | -6678.806670 | 0.375488               |
| <sup>2</sup> TS1 <sub>B</sub>          | -6677.052201 | 2.049078 | -6675.204844 | -6678.800153 | 0.374037               |
| <sup>2</sup> Int1 <sub>B</sub>         | -6677.056943 | 2.047748 | -6675.215182 | -6678.805779 | 0.379619               |
| <sup>4</sup> Re <sub>B</sub>           | -6677.045210 | 2.047408 | -6675.202362 | -6678.795184 | 0.375934               |
| <sup>4</sup> TS1 <sub>B</sub>          | -6677.030813 | 2.047526 | -6675.185986 | -6678.779820 | 0.371348               |
| <sup>4</sup> Int1 <sub>B</sub>         | -6677.056916 | 2.047740 | -6675.216449 | -6678.805556 | 0.379652               |
| Pathway C4-endo:                       |              |          |              |              |                        |
| <sup>2</sup> TS4 <sub>B,C4-endo</sub>  | -6677.049204 | 2.049851 | -6675.202993 | -6678.796562 | 0.376604               |
| <sup>2</sup> Int4 <sub>B,C4-endo</sub> | -6677.049140 | 2.050807 | -6675.202181 | -6678.797819 | 0.370501               |
| <sup>2</sup> TS5 <sub>B,C4-endo</sub>  | -6677.045271 | 2.047227 | -6675.195421 | -6678.786938 | 0.412531               |
| <sup>2</sup> Int5 <sub>B,C4-endo</sub> | -6677.148981 | 2.053599 | -6675.292449 | -6678.889153 | 0.408725               |
| <sup>4</sup> TS4 <sub>B,C4-endo</sub>  | -6677.063982 | 2.049926 | -6675.218339 | -6678.811947 | 0.376650               |
| <sup>4</sup> Int4 <sub>B,C4-endo</sub> | -6677.066903 | 2.050787 | -6675.216600 | -6678.810851 | 0.374258               |
| <sup>4</sup> Int5 <sub>B,C4-endo</sub> | -6677.091156 | 2.049539 | -6675.239285 | -6678.830437 | 0.409153               |
| Pathway C4-oxo:                        |              |          |              |              |                        |
| <sup>2</sup> TS4 <sub>B,C4-oxo</sub>   | -6677.071584 | 2.050842 | -6675.221058 | -6678.815380 | 0.377088               |
| <sup>2</sup> Int4 <sub>B,C4-oxo</sub>  | -6677.070616 | 2.051379 | -6675.219694 | -6678.814071 | 0.376689               |
| <sup>2</sup> Int5 <sub>B,C4-oxo</sub>  | -6677.158908 | 2.052011 | -6675.308455 | -6678.901643 | 0.401059               |
| <sup>4</sup> TS4 <sub>B,C4-oxo</sub>   | -6677.071572 | 2.050842 | -6675.221707 | -6678.815366 | 0.377051               |
| <sup>4</sup> Int4 <sub>B,C4-oxo</sub>  | -6677.070613 | 2.051357 | -6675.220457 | -6678.814071 | 0.376705               |
| <sup>4</sup> Int5 <sub>B,C4-oxo</sub>  | -6677.100416 | 2.048103 | -6675.251439 |              |                        |

**Table S11: Relative (free) energies (in kcal mol<sup>-1</sup>) of local minima and transition states for Pathway 2-C4 as calculated with B3LYP with model B in Gaussian-09.**

| Model B                                | $\Delta E$ | $\Delta E+ZPE$ | $\Delta G$ | $\Delta E$ | $\Delta E+ZPE$ | $\Delta G$ |
|----------------------------------------|------------|----------------|------------|------------|----------------|------------|
|                                        | BS1        | BS1            | BS1        | BS2        | BS2            | BS2        |
| <sup>2</sup> Re <sub>B</sub>           | 0.00       | 0.00           | 0.00       | 0.00       | 0.00           | 0.00       |
| <sup>2</sup> TS1 <sub>B</sub>          | 5.47       | 5.23           | 4.70       | 4.09       | 3.84           | 3.32       |
| <sup>2</sup> Int1 <sub>B</sub>         | 2.50       | 1.42           | -1.78      | 0.56       | -0.52          | -3.72      |
| <sup>4</sup> Re <sub>B</sub>           | 9.86       | 8.57           | 6.26       | 7.21       | 5.91           | 3.61       |
| <sup>4</sup> TS1 <sub>B</sub>          | 18.89      | 17.67          | 16.54      | 16.85      | 15.63          | 14.49      |
| <sup>4</sup> Int1 <sub>B</sub>         | 2.51       | 1.43           | -2.58      | 0.70       | -0.39          | -4.39      |
| Pathway C4-endo:                       |            |                |            |            |                |            |
| <sup>2</sup> TS4 <sub>B,C4-endo</sub>  | 7.35       | 7.59           | 5.87       | 6.34       | 6.58           | 4.86       |
| <sup>2</sup> Int4 <sub>B,C4-endo</sub> | 7.39       | 8.23           | 6.37       | 5.55       | 6.39           | 4.54       |
| <sup>2</sup> TS5 <sub>B,C4-endo</sub>  | 9.82       | 8.41           | 10.62      | 12.38      | 10.98          | 13.18      |
| <sup>2</sup> Int5 <sub>B,C4-endo</sub> | -55.26     | -52.67         | -50.27     | -51.76     | -49.17         | -46.77     |
| <sup>4</sup> TS4 <sub>B,C4-endo</sub>  | -1.92      | -1.63          | -3.76      | -3.31      | -3.02          | -5.15      |
| <sup>4</sup> Int4 <sub>B,C4-endo</sub> | -1.90      | -1.02          | -3.30      | -2.22      | -1.35          | -3.63      |
| <sup>4</sup> Int5 <sub>B,C4-endo</sub> | -18.97     | -18.93         | -16.91     | -14.91     | -14.87         | -12.85     |
| Pathway C4-exo:                        |            |                |            |            |                |            |
| <sup>2</sup> TS4 <sub>B,C4-oxo</sub>   | -6.69      | -5.83          | -5.47      | -5.47      | -4.60          | -4.25      |
| <sup>2</sup> Int4 <sub>B,C4-oxo</sub>  | -6.08      | -4.88          | -4.61      | -4.64      | -3.45          | -3.18      |
| <sup>2</sup> Int5 <sub>B,C4-oxo</sub>  | -61.49     | -59.89         | -60.31     | -59.60     | -58.00         | -58.2      |
| <sup>4</sup> TS4 <sub>B,C4-oxo</sub>   | -6.68      | -5.82          | -5.88      | -5.46      | -4.60          | -4.65      |
| <sup>4</sup> Int4 <sub>B,C4-oxo</sub>  | -6.08      | -4.90          | -5.09      | -4.64      | -3.46          | -3.66      |
| <sup>4</sup> Int5 <sub>B,C4-oxo</sub>  | -24.78     | -25.64         | -24.54     |            | -23.20         | -22.2      |

**Table S12: Absolute (free) energies (in au) of local minima and transition states for Pathway 2-C6 as calculated with B3LYP with model B in Gaussian-09.**

| Model B-C6                             | E [au]       | ZPE [au] | G [au]       | E [au]       | E <sub>disp</sub> [au] |
|----------------------------------------|--------------|----------|--------------|--------------|------------------------|
|                                        | [BS1,au]     | [BS1,au] | [BS1,au]     | [BS2,au]     | [BS2,au]               |
| Pathway C6-endo:                       |              |          |              |              |                        |
| <sup>2</sup> TS4 <sub>B,C6-endo</sub>  | -6677.056044 | 2.048825 | -6675.210684 | -6678.804549 | 0.379386               |
| <sup>2</sup> Int4 <sub>B,C6-endo</sub> | -6677.057783 | 2.049977 | -6675.207802 | -6678.810546 | 0.373479               |
| <sup>2</sup> TS5 <sub>B,C6-endo</sub>  | -6677.051281 | 2.046036 | -6675.201298 | -6678.796693 | 0.388985               |
| <sup>2</sup> INT5 <sub>B,C6-endo</sub> | -6677.139864 | 2.052567 | -6675.282522 | -6678.886511 | 0.384782               |
| <sup>4</sup> TS4 <sub>B,C6-endo</sub>  | -6677.055965 | 2.048818 | -6675.211416 | -6678.804439 | 0.379344               |
| <sup>4</sup> Int4 <sub>B,C6-out</sub>  | -6677.057634 | 2.050036 | -6675.211911 | -6678.804382 | 0.360495               |
| <sup>2</sup> Int4 <sub>B,C6-endo</sub> | -6677.057634 | 2.050014 | -6675.213090 | -6678.805395 | 0.378394               |
| <sup>4</sup> TS5 <sub>B,C6-endo</sub>  | -6677.043256 | 2.044794 | -6675.197786 | -6678.792313 | 0.385831               |
| <sup>4</sup> INT5 <sub>B,C6-endo</sub> | -6677.119941 | 2.049671 | -6675.268069 | -6678.871938 | 0.386353               |
| Pathway C6-exo:                        |              |          |              |              |                        |
| <sup>2</sup> TS4 <sub>B,C6-exo</sub>   | -6677.054336 | 2.048996 | -6675.205872 | -6678.807116 | 0.389643               |
| <sup>2</sup> Int4 <sub>B,C6-exo</sub>  | -6677.054872 | 2.049949 | -6675.206157 | -6678.809986 | 0.386087               |
| <sup>2</sup> TS5 <sub>B,C6-exo</sub>   | -6677.053882 | 2.045997 | -6675.202529 | -6678.797774 | 0.385222               |
| <sup>2</sup> INT5 <sub>B,C6-exo</sub>  | -6677.158110 | 2.051059 | -6675.308964 | -6678.904025 | 0.371072               |
| <sup>4</sup> TS4 <sub>B,C6-exo</sub>   | -6677.054339 | 2.049028 | -6675.206351 | -6678.807116 | 0.389642               |
| <sup>4</sup> Int4 <sub>B,C6-exo</sub>  | -6677.054862 | 2.049839 | -6675.204363 | -6678.807745 | 0.388363               |
| <sup>4</sup> TS5 <sub>B,C6-exo</sub>   | -6677.045041 | 2.044307 | -6675.197234 | -6678.792720 | 0.383390               |
| <sup>4</sup> INT5 <sub>B,C6-exo</sub>  | -6677.135053 | 2.048678 | -6675.290130 | -6678.895719 | 0.358053               |
| Pathway C6-HAT:                        |              |          |              |              |                        |
| <sup>2</sup> TS6 <sub>B</sub>          | -6677.012161 | 2.039512 | -6675.178016 | -6678.760755 | 0.389879               |
| <sup>4</sup> TS6 <sub>B</sub>          | -6677.012052 | 2.039407 | -6675.179073 | -6678.760560 | 0.389735               |
| <sup>4</sup> Int6 <sub>B</sub>         | -6677.018236 | 2.045007 | -6675.175445 | -6678.769099 | 0.383061               |

**Table S13: Relative (free) energies (in kcal mol<sup>-1</sup>) of local minima and transition states for Pathway 2-C6 as calculated with B3LYP with model B in Gaussian-09.**

| Model B-C6                             | $\Delta E$ | $\Delta E+ZPE$ | $\Delta G$ | $\Delta E$ | $\Delta E+ZPE$ | $\Delta G$ |
|----------------------------------------|------------|----------------|------------|------------|----------------|------------|
|                                        | BS1        | BS1            | BS1        | BS2        | BS2            | BS2        |
| Pathway C6-endo:                       |            |                |            |            |                |            |
| <sup>2</sup> TS4 <sub>B,C6-endo</sub>  | 3.06       | 2.66           | 1.04       | 1.33       | 0.93           | -0.69      |
| <sup>2</sup> Int4 <sub>B,C6-endo</sub> | 1.97       | 2.29           | 2.85       | -2.43      | -2.11          | -1.55      |
| <sup>2</sup> TS5 <sub>B,C6-endo</sub>  | 6.05       | 3.90           | 6.93       | 6.26       | 4.11           | 7.14       |
| <sup>2</sup> INT5 <sub>B,C6-endo</sub> | -49.54     | -47.59         | -44.04     | -50.10     | -48.16         | -44.60     |
| <sup>4</sup> TS4 <sub>B,C6-endo</sub>  | 3.11       | 2.70           | 0.58       | 1.40       | 0.99           | -1.13      |
| <sup>4</sup> Int4 <sub>B,C6-endo</sub> | 2.06       | 2.40           | -0.47      | 0.80       | -0.14          | -1.73      |
| <sup>4</sup> TS5 <sub>B,C6-endo</sub>  | 11.08      | 8.15           | 9.13       | 9.01       | 6.08           | 7.06       |
| <sup>4</sup> INT5 <sub>B,C6-endo</sub> | -37.04     | -36.91         | -34.97     | -40.96     | -40.83         | -38.89     |
| Pathway C6-exo:                        |            |                |            |            |                |            |
| <sup>2</sup> TS4 <sub>B,C6-exo</sub>   | 4.13       | 3.84           | 4.06       | -0.28      | -0.58          | -0.35      |
| <sup>2</sup> Int4 <sub>B,C6-exo</sub>  | 3.80       | 4.10           | 3.88       | -2.08      | -1.78          | -2.00      |
| <sup>2</sup> TS5 <sub>B,C6-exo</sub>   | 4.42       | 2.24           | 6.16       | 5.58       | 3.40           | 7.32       |
| <sup>2</sup> INT5 <sub>B,C6-exo</sub>  | -60.99     | -59.99         | -60.63     | -61.09     | -60.09         | -60.74     |
| <sup>4</sup> TS4 <sub>B,C6-exo</sub>   | 4.13       | 3.85           | 3.76       | -0.28      | -0.56          | -0.65      |
| <sup>4</sup> Int4 <sub>B,C6-exo</sub>  | 3.80       | 4.03           | 5.01       | -0.67      | -0.44          | 0.53       |
| <sup>4</sup> TS5 <sub>B,C6-exo</sub>   | 9.96       | 6.73           | 9.48       | 8.75       | 5.51           | 8.27       |
| <sup>4</sup> INT5 <sub>B,C6-exo</sub>  | -46.52     | -47.01         | -48.81     | -55.88     | -56.38         | -58.17     |
| Pathway C6-HAT:                        |            |                |            |            |                |            |
| <sup>2</sup> TS6 <sub>B</sub>          | 30.60      | 24.35          | 21.54      | 28.81      | 22.56          | 19.75      |
| <sup>4</sup> TS6 <sub>B</sub>          | 30.67      | 24.35          | 20.88      | 28.93      | 22.62          | 19.14      |
| <sup>4</sup> Int6 <sub>B</sub>         | 26.79      | 23.99          | 23.15      | 23.58      | 20.78          | 19.94      |



**Table S14: Group spin densities and charges of local minima and transition states for Pathway 2-C6 as calculated with B3LYP/BS1 with model B in Gaussian-09.**

Spin densities:

| Species                                | $\rho_{\text{Fe}}$ | $\rho_{\text{Porp}}$ | $\rho_{\text{SH}}$ | $\rho_{\text{O}}$ | $\rho_{\text{OH}}$ | $\rho_{\text{NO}_2}$ | $\rho_{\text{Subs}}$ | $\rho_{\text{Subs}(\text{NO}_2)}$ | $\rho_{\text{Lig1}}$ | $\rho_{\text{Arg}}$ | $\rho_{\text{PheGlu}}$ | $\rho_{\text{Tyr}}$ | $\rho_{\text{Total}}$ |
|----------------------------------------|--------------------|----------------------|--------------------|-------------------|--------------------|----------------------|----------------------|-----------------------------------|----------------------|---------------------|------------------------|---------------------|-----------------------|
| ver1:                                  |                    |                      |                    |                   |                    |                      |                      |                                   |                      |                     |                        |                     |                       |
| <sup>2</sup> Re <sub>B</sub>           | 1.34               | -0.12                | -0.20              | -0.03             |                    | 0.00                 | 0.00                 |                                   | 0.00                 | 0.00                | 0.00                   | 0.00                | 1.00                  |
| <sup>2</sup> TS1 <sub>B</sub>          | 1.23               | -0.07                | -0.16              | 0.00              |                    | 0.00                 | 0.00                 |                                   | 0.00                 | 0.00                | 0.00                   | 0.00                | 1.00                  |
| <sup>2</sup> Int1 <sub>B</sub>         | 1.27               | -0.28                | -0.05              | 0.82              |                    | -0.75                | -0.01                |                                   | 0.00                 | 0.00                | 0.00                   | 0.00                | 1.00                  |
| <sup>4</sup> Re <sub>B</sub>           | 2.64               | -0.02                | 0.29               | 0.09              |                    | 0.00                 | 0.00                 |                                   | 0.00                 | 0.00                | 0.00                   | 0.00                | 3.00                  |
| <sup>4</sup> TS1 <sub>B</sub>          | 2.20               | -0.04                | 0.24               | 0.38              |                    | 0.23                 | 0.00                 |                                   | 0.00                 | 0.00                | 0.00                   | 0.00                | 3.00                  |
| <sup>4</sup> Int1 <sub>B</sub>         | 1.25               | 0.12                 | -0.01              | 0.83              |                    | 0.80                 | 0.01                 |                                   | 0.00                 | 0.00                | 0.00                   | 0.00                | 3.00                  |
| Pathway C6-endo:                       |                    |                      |                    |                   |                    |                      |                      |                                   |                      |                     |                        |                     |                       |
| <sup>2</sup> TS4 <sub>B,C6-endo</sub>  | 1.29               | -0.07                | -0.02              | 0.80              |                    | 0.00                 | -0.99                |                                   | 0.00                 | 0.00                | 0.00                   | 0.00                | 1.00                  |
| <sup>2</sup> Int4 <sub>B,C6-endo</sub> | 1.29               | -0.07                | -0.02              | 0.80              |                    |                      |                      | -0.99                             | 0.00                 | 0.00                | 0.00                   | 0.00                | 1.00                  |
| <sup>2</sup> TS5 <sub>B,C6-endo</sub>  | 1.02               | -0.06                | -0.04              |                   | 0.36               | 0.00                 |                      | -0.28                             | 0.00                 | 0.00                | 0.00                   | 0.00                | 1.00                  |
| <sup>2</sup> INT5 <sub>B,C6-endo</sub> | 1.13               | -0.06                | -0.08              |                   | 0.02               | 0.00                 |                      | 0.00                              | 0.00                 | 0.00                | 0.00                   | 0.00                | 1.00                  |
| <sup>4</sup> TS4 <sub>B,C6-endo</sub>  | 1.29               | -0.07                | -0.02              | 0.80              |                    | 0.00                 | 1.00                 |                                   | 0.00                 | 0.00                | 0.00                   | 0.00                | 3.00                  |
| <sup>4</sup> Int4 <sub>B,C6-endo</sub> | 1.29               | -0.07                | -0.02              | 0.80              |                    |                      |                      | 1.00                              | 0.00                 | 0.00                | 0.00                   | 0.00                | 3.00                  |
| <sup>4</sup> TS5 <sub>B,C6-endo</sub>  | 1.92               | -0.10                | 0.00               |                   | 0.47               | 0.00                 |                      | 0.70                              | 0.00                 | 0.00                | 0.00                   | 0.00                | 3.00                  |
| <sup>4</sup> INT5 <sub>B,C6-endo</sub> | 2.63               | -0.06                | 0.11               |                   | 0.31               |                      |                      | 0.00                              | 0.00                 | 0.00                | 0.00                   | 0.00                | 3.00                  |
| Pathway C6-exo:                        |                    |                      |                    |                   |                    |                      |                      |                                   |                      |                     |                        |                     |                       |
| <sup>2</sup> TS4 <sub>B,C6-exo</sub>   | 1.38               | -0.08                | -0.03              | 0.72              |                    | -0.50                | -0.50                |                                   | 0.00                 | 0.00                | 0.00                   | 0.00                | 1.00                  |
| <sup>2</sup> Int4 <sub>B,C6-exo</sub>  | 1.38               | -0.08                | -0.03              | 0.72              |                    | 0.00                 | -1.00                |                                   | 0.00                 | 0.00                | 0.00                   | 0.00                | 1.00                  |
| <sup>2</sup> TS5 <sub>B,C6-exo</sub>   | 1.20               | -0.07                | -0.01              |                   | 0.58               |                      |                      | -0.69                             | 0.00                 | 0.00                | 0.00                   | 0.00                | 1.00                  |
| <sup>2</sup> INT5 <sub>B,C6-exo</sub>  | 0.92               | -0.05                | 0.00               |                   | 0.14               |                      |                      | 0.00                              | 0.00                 | 0.00                | 0.00                   | 0.00                | 1.00                  |

|                                       |      |       |       |      |      |       |      |      |      |      |      |      |      |
|---------------------------------------|------|-------|-------|------|------|-------|------|------|------|------|------|------|------|
| <sup>4</sup> TS4 <sub>B,C6-exo</sub>  | 1.38 | -0.08 | -0.03 | 0.72 |      | 0.24  | 0.76 |      | 0.00 | 0.00 | 0.00 | 0.00 | 3.00 |
| <sup>4</sup> Int4 <sub>B,C6-exo</sub> | 1.38 | -0.08 | -0.03 | 0.72 |      | 0.00  | 1.00 |      | 0.00 | 0.00 | 0.00 | 0.00 | 3.00 |
| <sup>4</sup> TS5 <sub>B,C6-exo</sub>  | 1.45 | -0.08 | -0.02 |      | 0.69 |       |      | 0.97 | 0.00 | 0.00 | 0.00 | 0.00 | 3.00 |
| <sup>4</sup> INT5 <sub>B,C6-exo</sub> | 2.76 | 0.22  | -0.08 |      | 0.10 |       |      | 0.00 | 0.00 | 0.00 | 0.00 | 0.00 | 3.00 |
| Pathway C6-HAT:                       |      |       |       |      |      |       |      |      |      |      |      |      |      |
| <sup>2</sup> TS6 <sub>B,HAT</sub>     | 1.21 | -0.07 | -0.02 |      | 0.57 | -0.96 | 0.27 |      | 0.00 | 0.00 | 0.00 | 0.00 | 1.00 |
| <sup>4</sup> TS6 <sub>B,HAT</sub>     | 1.20 | -0.05 | 0.00  |      | 0.61 | 0.96  | 0.28 |      | 0.00 | 0.00 | 0.00 | 0.00 | 3.00 |
| <sup>4</sup> Int6 <sub>B,HAT</sub>    | 0.99 | -0.04 | 0.02  |      | 0.25 | 0.96  | 0.82 |      | 0.00 | 0.00 | 0.00 | 0.00 | 3.00 |

Charges:

| Species                                | Fe   | Porp  | SH    | O     | OH    | NO2   | Subs | Subs(NO <sub>2</sub> ) | Lig1 | Arg  | PheGlu | Tyr   | Total |
|----------------------------------------|------|-------|-------|-------|-------|-------|------|------------------------|------|------|--------|-------|-------|
| ver1:                                  |      |       |       |       |       |       |      |                        |      |      |        |       |       |
| <sup>2</sup> Re <sub>B</sub>           | 0.33 | -1.08 | -0.23 | -0.35 |       | -0.28 | 0.11 |                        | 0.51 | 0.71 | -0.65  | -0.06 | -1.00 |
| <sup>2</sup> TS1 <sub>B</sub>          | 0.40 | -1.01 | -0.34 | -0.32 |       | -0.28 | 0.02 |                        | 0.52 | 0.69 | -0.63  | -0.06 | -1.00 |
| <sup>2</sup> Int1 <sub>B</sub>         | 0.43 | -0.90 | -0.46 | -0.49 |       | -0.19 | 0.08 |                        | 0.51 | 0.72 | -0.65  | -0.06 | -1.00 |
| <sup>4</sup> Re <sub>B</sub>           | 0.47 | -1.01 | -0.40 | -0.38 |       | -0.29 | 0.11 |                        | 0.51 | 0.71 | -0.65  | -0.06 | -1.00 |
| <sup>4</sup> TS1 <sub>B</sub>          | 0.49 | -0.94 | -0.37 | -0.40 |       | -0.32 | 0.02 |                        | 0.52 | 0.69 | -0.63  | -0.06 | -1.00 |
| <sup>4</sup> Int1 <sub>B</sub>         | 0.43 | -0.94 | -0.48 | -0.48 |       | -0.14 | 0.05 |                        | 0.53 | 0.70 | -0.65  | -0.02 | -1.00 |
| Pathway C6-endo:                       |      |       |       |       |       |       |      |                        |      |      |        |       |       |
| <sup>2</sup> TS4 <sub>B,C6-endo</sub>  | 0.42 | -1.05 | -0.44 | -0.51 |       | 0.00  | 0.06 |                        | 0.49 | 0.70 | -0.61  | -0.06 | -1.00 |
| <sup>2</sup> Int4 <sub>B,C6-endo</sub> | 0.42 | -1.05 | -0.44 | -0.51 |       |       |      | 0.06                   | 0.49 | 0.70 | -0.61  | -0.06 | -1.00 |
| <sup>2</sup> TS5 <sub>B,C6-endo</sub>  | 0.40 | -1.15 | -0.43 |       | -0.29 |       |      | -0.02                  | 0.51 | 0.71 | -0.62  | -0.10 | -1.00 |
| <sup>2</sup> INT5 <sub>B,C6-endo</sub> | 0.44 | -1.11 | -0.55 |       | -0.33 |       |      | 0.06                   | 0.46 | 0.74 | -0.65  | -0.05 | -1.00 |
| <sup>4</sup> TS4 <sub>B,C6-endo</sub>  | 0.42 | -1.05 | -0.44 | -0.51 |       | 0.00  | 0.06 |                        | 0.49 | 0.70 | -0.61  | -0.06 | -1.00 |
| <sup>4</sup> Int4 <sub>B,C6-endo</sub> | 0.42 | -1.05 | -0.44 | -0.51 |       |       |      | 0.06                   | 0.49 | 0.70 | -0.61  | -0.06 | -1.00 |
| <sup>4</sup> TS5 <sub>B,C6-endo</sub>  | 0.48 | -1.01 | -0.38 |       | -0.28 |       |      | -0.31                  | 0.51 | 0.71 | -0.62  | -0.10 | -1.00 |
| <sup>4</sup> INT5 <sub>B,C6-endo</sub> | 0.55 | -1.10 | -0.68 |       | -0.41 |       |      | 0.09                   | 0.52 | 0.74 | -0.68  | -0.02 | -1.00 |
| Pathway C6-exo:                        |      |       |       |       |       |       |      |                        |      |      |        |       |       |
| <sup>2</sup> TS4 <sub>B,C6-exo</sub>   | 0.44 | -1.01 | -0.39 | -0.56 |       | -0.30 | 0.31 |                        | 0.51 | 0.69 | -0.65  | -0.04 | -1.00 |
| <sup>2</sup> Int4 <sub>B,C6-exo</sub>  | 0.44 | -1.01 | -0.39 | -0.56 |       | 0.00  | 0.02 |                        | 0.51 | 0.69 | -0.65  | -0.04 | -1.00 |
| <sup>2</sup> TS5 <sub>B,C6-exo</sub>   | 0.41 | -1.09 | -0.41 |       | -0.22 |       |      | -0.27                  | 0.59 | 0.69 | -0.61  | -0.08 | -1.00 |
| <sup>2</sup> INT5 <sub>B,C6-exo</sub>  | 0.30 | -1.17 | -0.46 |       | -0.26 |       |      | 0.00                   | 0.59 | 0.69 | -0.60  | -0.08 | -1.00 |
| <sup>4</sup> TS4 <sub>B,C6-exo</sub>   | 0.44 | -1.01 | -0.39 | -0.56 |       | -0.33 | 0.34 |                        | 0.51 | 0.69 | -0.65  | -0.04 | -1.00 |
| <sup>4</sup> Int4 <sub>B,C6-exo</sub>  | 0.44 | -1.01 | -0.39 | -0.56 |       | 0.00  | 0.00 |                        | 0.51 | 0.70 | -0.65  | -0.03 | -1.00 |
| <sup>4</sup> TS5 <sub>B,C6-exo</sub>   | 0.44 | -1.01 | -0.38 |       | -0.21 |       |      | -0.42                  | 0.58 | 0.69 | -0.61  | -0.08 | -1.00 |

|                                       |      |       |       |  |       |       |       |      |      |      |       |       |       |
|---------------------------------------|------|-------|-------|--|-------|-------|-------|------|------|------|-------|-------|-------|
| <sup>4</sup> INT5 <sub>B,C6-exo</sub> | 0.42 | -1.38 | -0.39 |  | -0.25 |       |       | 0.01 | 0.59 | 0.69 | -0.60 | -0.08 | -1.00 |
| Pathway C6-HAT:                       |      |       |       |  |       |       |       |      |      |      |       |       |       |
| <sup>2</sup> TS6 <sub>B,HAT</sub>     | 0.41 | -1.07 | -0.37 |  | -0.26 | -0.03 | -0.18 |      | 0.50 | 0.69 | -0.64 | -0.06 | -1.00 |
| <sup>4</sup> TS6 <sub>B,HAT</sub>     | 0.41 | -1.07 | -0.37 |  | -0.26 | -0.03 | -0.18 |      | 0.50 | 0.69 | -0.64 | -0.06 | -1.00 |
| <sup>4</sup> Int6 <sub>B,HAT</sub>    | 0.28 | -1.14 | -0.33 |  | -0.30 | -0.05 | 0.04  |      | 0.50 | 0.69 | -0.64 | -0.05 | -1.00 |

**Table S15: Group spin densities and charges of local minima and transition states for Pathway 2-C6 as calculated with B3LYP/BS2 with model B in Gaussian-09.**

Spin densities:

| Species                                | $\rho_{\text{Fe}}$ | $\rho_{\text{Porp}}$ | $\rho_{\text{SH}}$ | $\rho_{\text{O}}$ | $\rho_{\text{OH}}$ | $\rho_{\text{NO}_2}$ | $\rho_{\text{Subs}}$ | $\rho_{\text{Subs}(\text{NO}_2)}$ | $\rho_{\text{Lig1}}$ | $\rho_{\text{Arg}}$ | $\rho_{\text{PheGlu}}$ | $\rho_{\text{Tyr}}$ | $\rho_{\text{Total}}$ |
|----------------------------------------|--------------------|----------------------|--------------------|-------------------|--------------------|----------------------|----------------------|-----------------------------------|----------------------|---------------------|------------------------|---------------------|-----------------------|
| ver1:                                  |                    |                      |                    |                   |                    |                      |                      |                                   |                      |                     |                        |                     |                       |
| <sup>2</sup> Re <sub>B</sub>           | 1.16               | -0.19                | -0.01              | 0.04              |                    | 0.00                 | 0.00                 |                                   | 0.00                 | 0.00                | 0.00                   | 0.00                | 1.00                  |
| <sup>2</sup> TS1 <sub>B</sub>          | 1.54               | -0.23                | -0.03              | 0.06              |                    | -0.34                | 0.00                 |                                   | 0.00                 | 0.00                | 0.00                   | 0.00                | 1.00                  |
| <sup>2</sup> Int1 <sub>B</sub>         | 1.41               | -0.21                | -0.03              | 0.83              |                    | -0.98                | -0.02                |                                   | 0.00                 | 0.00                | 0.00                   | 0.00                | 1.00                  |
| <sup>4</sup> Re <sub>B</sub>           | 3.01               | -0.32                | 0.20               | 0.10              |                    | 0.02                 | 0.00                 |                                   | 0.00                 | 0.00                | 0.00                   | 0.00                | 3.00                  |
| <sup>4</sup> TS1 <sub>B</sub>          | 2.40               | -0.26                | 0.21               | 0.37              |                    | 0.28                 | 0.00                 |                                   | 0.00                 | 0.00                | 0.00                   | 0.00                | 3.00                  |
| <sup>4</sup> Int1 <sub>B</sub>         | 1.33               | 0.09                 | 0.01               | 0.85              |                    | 0.70                 | 0.01                 |                                   | 0.00                 | 0.00                | 0.00                   | 0.00                | 3.00                  |
| Pathway C6-endo:                       |                    |                      |                    |                   |                    |                      |                      |                                   |                      |                     |                        |                     |                       |
| <sup>2</sup> TS4 <sub>B,C6-endo</sub>  | 1.44               | -0.23                | -0.04              | 0.82              |                    | 0.00                 | -1.00                |                                   | 0.00                 | 0.00                | 0.00                   | 0.00                | 1.00                  |
| <sup>2</sup> Int4 <sub>B,C6-endo</sub> | 1.45               | -0.24                | -0.04              | 0.82              |                    |                      |                      | -1.00                             | 0.00                 | 0.00                | 0.00                   | 0.00                | 1.00                  |
| <sup>2</sup> TS5 <sub>B,C6-endo</sub>  | 1.48               | -0.25                | -0.04              |                   | 0.59               | 0.00                 |                      | -0.77                             | 0.00                 | 0.00                | 0.00                   | 0.00                | 1.00                  |
| <sup>2</sup> INT5 <sub>B,C6-endo</sub> | 1.13               | -0.20                | -0.01              |                   | 0.08               | 0.00                 |                      | 0.00                              | 0.00                 | 0.00                | 0.00                   | 0.00                | 1.00                  |
| <sup>4</sup> TS4 <sub>B,C6-endo</sub>  | 1.44               | -0.22                | -0.04              | 0.83              |                    | 0.00                 | 0.99                 |                                   | 0.00                 | 0.00                | 0.00                   | 0.00                | 3.00                  |
| <sup>4</sup> Int4 <sub>B,C6-endo</sub> | 1.45               | -0.22                | -0.04              | 0.82              |                    |                      |                      | 0.99                              | 0.00                 | 0.00                | 0.00                   | 0.00                | 3.00                  |
| <sup>4</sup> TS5 <sub>B,C6-endo</sub>  | 1.90               | -0.27                | -0.04              |                   | 0.57               | 0.00                 |                      | 0.84                              | 0.00                 | 0.00                | 0.01                   | 0.00                | 3.00                  |
| <sup>4</sup> INT5 <sub>B,C6-endo</sub> | 2.94               | -0.30                | 0.10               |                   | 0.26               |                      |                      | 0.00                              | 0.00                 | 0.00                | 0.00                   | 0.00                | 3.00                  |
| Pathway C6-exo:                        |                    |                      |                    |                   |                    |                      |                      |                                   |                      |                     |                        |                     |                       |
| <sup>2</sup> TS4 <sub>B,C6-exo</sub>   | 1.56               | -0.28                | -0.04              | 0.77              |                    | -0.22                | -0.79                |                                   | 0.00                 | 0.00                | 0.00                   | 0.00                | 1.00                  |
| <sup>2</sup> Int4 <sub>B,C6-exo</sub>  | 1.56               | -0.28                | -0.04              | 0.77              |                    |                      |                      | -1.01                             | 0.00                 | 0.00                | 0.00                   | 0.00                | 1.00                  |
| <sup>2</sup> TS5 <sub>B,C6-exo</sub>   | 1.40               | -0.21                | -0.03              |                   | 0.61               |                      |                      | -0.76                             | 0.00                 | -0.01               | 0.00                   | 0.00                | 1.00                  |
| <sup>2</sup> INT5 <sub>B,C6-exo</sub>  | 1.07               | -0.16                | 0.00               |                   | 0.08               |                      |                      | 0.00                              | 0.00                 | 0.00                | 0.00                   | 0.00                | 1.00                  |

|                                              |      |       |       |      |      |       |      |      |      |      |       |      |      |
|----------------------------------------------|------|-------|-------|------|------|-------|------|------|------|------|-------|------|------|
| <sup>4</sup> <b>TS4</b> <sub>B,C6-exo</sub>  | 1.56 | -0.27 | -0.04 | 0.77 |      | 0.22  | 0.77 |      | 0.00 | 0.00 | -0.01 | 0.00 | 3.00 |
| <sup>4</sup> <b>Int4</b> <sub>B,C6-exo</sub> | 1.55 | -0.27 | -0.04 | 0.77 |      |       |      | 0.99 | 0.00 | 0.00 | 0.00  | 0.00 | 3.00 |
| <sup>4</sup> <b>TS5</b> <sub>B,C6-exo</sub>  | 1.87 | -0.24 | -0.04 |      | 0.58 |       |      | 0.83 | 0.00 | 0.01 | 0.00  | 0.00 | 3.00 |
| <sup>4</sup> <b>INT5</b> <sub>B,C6-exo</sub> | 3.09 | -0.03 | -0.08 |      | 0.02 |       |      | 0.00 | 0.00 | 0.00 | 0.00  | 0.00 | 3.00 |
| Pathway C6-HAT:                              |      |       |       |      |      |       |      |      |      |      |       |      |      |
| <sup>2</sup> <b>TS6</b> <sub>B,HAT</sub>     | 1.18 | -0.18 | -0.02 |      | 0.29 | -0.95 | 0.68 |      | 0.00 | 0.00 | 0.00  | 0.00 | 1.00 |
| <sup>4</sup> <b>TS6</b> <sub>B,HAT</sub>     | 1.24 | -0.18 | 0.00  |      | 0.35 | 0.95  | 0.65 |      | 0.00 | 0.00 | 0.00  | 0.00 | 3.00 |
| <sup>4</sup> <b>Int6</b> <sub>B,HAT</sub>    | 1.17 | -0.20 | 0.00  |      | 0.11 | 0.95  | 0.98 |      | 0.00 | 0.00 | 0.00  | 0.00 | 3.00 |

## Charges:

| Species                                | Fe    | Porp  | SH    | O     | OH    | NO2   | Subs  | Subs(NO <sub>2</sub> ) | Lig1 | Arg  | PheGlu | Tyr  | Total |
|----------------------------------------|-------|-------|-------|-------|-------|-------|-------|------------------------|------|------|--------|------|-------|
| ver1:                                  |       |       |       |       |       |       |       |                        |      |      |        |      |       |
| <sup>2</sup> Re <sub>B</sub>           | -1.41 | 0.08  | -0.36 | -0.22 |       | -0.01 | -0.30 |                        | 1.07 | 0.93 | -0.89  | 0.12 | -1.00 |
| <sup>2</sup> TS1 <sub>B</sub>          | -1.79 | 0.60  | -0.33 | 0.01  |       | -0.40 | -0.31 |                        | 1.09 | 0.92 | -0.93  | 0.14 | -1.00 |
| <sup>2</sup> Int1 <sub>B</sub>         | -2.70 | 1.37  | -0.49 | 0.13  |       | -0.18 | -0.40 |                        | 1.05 | 0.94 | -0.87  | 0.15 | -1.00 |
| <sup>4</sup> Re <sub>B</sub>           | -1.01 | 0.16  | -0.70 | -0.29 |       | -0.07 | -0.29 |                        | 1.07 | 0.93 | -0.90  | 0.12 | -1.00 |
| <sup>4</sup> TS1 <sub>B</sub>          | -2.13 | 0.74  | -0.42 | 0.17  |       | -0.26 | -0.30 |                        | 1.08 | 0.93 | -0.93  | 0.13 | -1.00 |
| <sup>4</sup> Int1 <sub>B</sub>         | -2.68 | 1.38  | -0.50 | 0.13  |       | -0.17 | -0.39 |                        | 1.02 | 0.94 | -0.86  | 0.14 | -1.00 |
| Pathway C6-endo:                       |       |       |       |       |       |       |       |                        |      |      |        |      |       |
| <sup>2</sup> TS4 <sub>B,C6-endo</sub>  | -3.69 | 1.97  | -0.41 | 0.14  |       | 0.00  | -0.34 |                        | 1.05 | 1.06 | -0.80  | 0.03 | -1.00 |
| <sup>2</sup> Int4 <sub>B,C6-endo</sub> | -3.66 | 1.94  | -0.43 | 0.16  |       |       |       | -0.35                  | 1.05 | 1.06 | -0.80  | 0.03 | -1.00 |
| <sup>2</sup> TS5 <sub>B,C6-endo</sub>  | -3.97 | 2.43  | -0.27 |       | 0.83  |       |       | -1.04                  | 0.90 | 0.95 | -0.84  | 0.01 | -1.00 |
| <sup>2</sup> INT5 <sub>B,C6-endo</sub> | -2.80 | 1.17  | -0.38 |       | 0.14  |       |       | -0.14                  | 0.85 | 0.97 | -0.86  | 0.05 | -1.00 |
| <sup>4</sup> TS4 <sub>B,C6-endo</sub>  | -3.67 | 1.96  | -0.41 | 0.13  |       | 0.00  | -0.34 |                        | 1.05 | 1.06 | -0.80  | 0.03 | -1.00 |
| <sup>4</sup> Int4 <sub>B,C6-endo</sub> | -3.63 | 1.93  | -0.43 | 0.15  |       |       |       | -0.35                  | 1.05 | 1.06 | -0.80  | 0.03 | -1.00 |
| <sup>4</sup> TS5 <sub>B,C6-endo</sub>  | -2.76 | 1.44  | -0.53 |       | 1.11  |       |       | -1.27                  | 0.89 | 0.94 | -0.84  | 0.01 | -1.00 |
| <sup>4</sup> INT5 <sub>B,C6-endo</sub> | -2.44 | 1.36  | -0.82 |       | 0.09  |       |       | -0.19                  | 0.85 | 0.96 | -0.86  | 0.05 | -1.00 |
| Pathway C6-exo:                        |       |       |       |       |       |       |       |                        |      |      |        |      |       |
| <sup>2</sup> TS4 <sub>B,C6-exo</sub>   | -4.76 | 2.94  | -0.21 | 0.28  |       | -0.21 | -0.12 |                        | 1.01 | 0.91 | -0.97  | 0.13 | -1.00 |
| <sup>2</sup> Int4 <sub>B,C6-exo</sub>  | -4.70 | 2.89  | -0.22 | 0.27  |       |       |       | -0.32                  | 1.01 | 0.92 | -0.97  | 0.11 | -1.00 |
| <sup>2</sup> TS5 <sub>B,C6-exo</sub>   | -2.67 | 1.30  | -0.50 |       | 0.74  |       |       | -0.72                  | 0.76 | 0.91 | -0.86  | 0.04 | -1.00 |
| <sup>2</sup> INT5 <sub>B,C6-exo</sub>  | -0.75 | -0.35 | -0.53 |       | -0.29 |       |       | -0.12                  | 0.99 | 0.92 | -0.88  | 0.00 | -1.00 |
| <sup>4</sup> TS4 <sub>B,C6-exo</sub>   | -4.76 | 2.94  | -0.21 | 0.28  |       | -0.21 | -0.12 |                        | 1.01 | 0.91 | -0.97  | 0.13 | -1.00 |
| <sup>4</sup> Int4 <sub>B,C6-exo</sub>  | -4.56 | 2.79  | -0.23 | 0.25  |       |       |       | -0.34                  | 1.02 | 0.89 | -0.96  | 0.13 | -1.00 |
| <sup>4</sup> TS5 <sub>B,C6-exo</sub>   | -2.35 | 1.03  | -0.63 |       | 1.02  |       |       | -0.89                  | 0.74 | 0.91 | -0.85  | 0.02 | -1.00 |

|                                       |       |       |       |  |       |      |       |      |       |      |       |       |       |
|---------------------------------------|-------|-------|-------|--|-------|------|-------|------|-------|------|-------|-------|-------|
| <sup>4</sup> INT5 <sub>B,C6-exo</sub> | -0.96 | -0.23 | -0.43 |  | -0.29 |      |       | 0.00 | -0.12 | 0.99 | 0.92  | -0.88 | -1.00 |
| Pathway C6-HAT:                       |       |       |       |  |       |      |       |      |       |      |       |       |       |
| <sup>2</sup> TS6 <sub>B,HAT</sub>     | -3.77 | 1.92  | -0.27 |  | 0.54  | 0.02 | -0.72 |      | 1.08  | 0.97 | -0.91 | 0.13  | -1.00 |
| <sup>4</sup> TS6 <sub>B,HAT</sub>     | -3.68 | 1.85  | -0.28 |  | 0.53  | 0.03 | -0.73 |      | 1.09  | 0.97 | -0.90 | 0.13  | -1.00 |
| <sup>4</sup> Int6 <sub>B,HAT</sub>    | -3.42 | 1.53  | -0.27 |  | 0.25  | 0.07 | -0.43 |      | 1.01  | 1.00 | -0.90 | 0.14  | -1.00 |



**Table S16: Absolute (free) energies (in au) of local minima and transition states for Pathway2-C7 as calculated with B3LYP with model B in Gaussian-09.**

| Model B-C7                             | E [au]       | ZPE [au] | G [au]       | E [au]       | E <sub>disp</sub> [au] |
|----------------------------------------|--------------|----------|--------------|--------------|------------------------|
|                                        | [BS1,au]     | [BS1,au] | [BS1,au]     | [BS2,au]     | [BS2,au]               |
| Pathway C7-endo:                       |              |          |              |              |                        |
| <sup>2</sup> TS4 <sub>B,C7-endo</sub>  | -6677.062341 | 2.049647 | -6675.215334 | -6678.808421 | 0.378834               |
| <sup>2</sup> Int4 <sub>B,C7-endo</sub> | -6677.063349 | 2.050901 | -6675.215431 | -6678.810591 | 0.375916               |
| <sup>2</sup> TS5 <sub>B,C7-endo</sub>  | -6677.054162 | 2.046256 | -6675.197569 | -6678.800674 | 0.378810               |
| <sup>2</sup> Int5 <sub>B,C7-endo</sub> | -6677.154592 | 2.052069 | -6675.297970 | -6678.900018 | 0.372764               |
| <sup>4</sup> TS4 <sub>B,C7-endo</sub>  | -6677.062340 | 2.049648 | -6675.215989 | -6678.808421 | 0.378830               |
| <sup>4</sup> Int4 <sub>B,C7-endo</sub> | -6677.063344 | 2.050931 | -6675.215805 | -6678.807858 | 0.378635               |
| <sup>4</sup> TS5 <sub>B,C7-endo</sub>  | -6677.046995 | 2.045581 | -6675.195629 | -6678.796661 | 0.377391               |
| <sup>4</sup> Int5 <sub>B,C7-endo</sub> | -6677.100191 | 2.049187 | -6675.247700 | -6678.849771 | 0.374099               |
| Pathway C7-exo:                        |              |          |              |              |                        |
| <sup>2</sup> TS4 <sub>B,C7-exo</sub>   | -6677.056131 | 2.049153 | -6675.205757 | -6678.807375 | 0.391421               |
| <sup>2</sup> Int4 <sub>B,C7-exo</sub>  | -6677.060800 | 2.050269 | -6675.212555 | -6678.807174 | 0.375421               |
| <sup>2</sup> TS5 <sub>B,C7-exo</sub>   | -6677.055390 | 2.046149 | -6675.210541 | -6678.798992 | 0.384971               |
| <sup>2</sup> Int5 <sub>B,C7-exo</sub>  | -6677.158151 | 2.051257 | -6675.307672 | -6678.905440 | 0.371572               |
| <sup>4</sup> TS4 <sub>B,C7-exo</sub>   | -6677.056228 | 2.049165 | -6675.206540 | -6678.806294 | 0.392233               |
| <sup>4</sup> Int4 <sub>B,C7-exo</sub>  | -6677.060800 | 2.050276 | -6675.213204 | -6678.807165 | 0.375439               |
| <sup>4</sup> TS5 <sub>B,C7-exo</sub>   | -6677.049122 | 2.044940 | -6675.203878 | -6678.795031 | 0.384971               |
| <sup>4</sup> Int5 <sub>B,C7-exo</sub>  | -6677.144509 | 2.049105 | -6675.295677 | -6678.895719 | 0.374360               |

**Table S17: Relative (free) energies (in kcal mol<sup>-1</sup>) of local minima and transition states for Pathway2-C7 as calculated with B3LYP with model B in Gaussian-09.**

| Model B-C7                             | $\Delta E$ | $\Delta E+ZPE$ | $\Delta G$ | $\Delta E$ | $\Delta E+ZPE$ | $\Delta G$ | $\Delta E_d+ZPE$ |
|----------------------------------------|------------|----------------|------------|------------|----------------|------------|------------------|
|                                        | BS1        | BS1            | BS1        | BS2        | BS2            | BS2        | BS2              |
| Pathway C7-endo:                       |            |                |            |            |                |            |                  |
| <sup>2</sup> TS4 <sub>B,C7-endo</sub>  | -0.89      | -0.78          | -1.88      | -1.10      | -0.99          | -2.09      | 1.00             |
| <sup>2</sup> Int4 <sub>B,C7-endo</sub> | -1.52      | -0.63          | -1.94      | -2.46      | -1.56          | -2.88      | -2.19            |
| <sup>2</sup> TS5 <sub>B,C7-endo</sub>  | 4.24       | 2.23           | 9.27       | 3.76       | 1.75           | 8.79       | 5.85             |
| <sup>2</sup> Int5 <sub>B,C7-endo</sub> | -58.78     | -57.15         | -53.73     | -58.58     | -56.95         | -53.53     | -60.29           |
| <sup>4</sup> TS4 <sub>B,C7-endo</sub>  | -0.89      | -0.78          | -2.29      | -1.10      | -0.99          | -2.50      | 1.00             |
| <sup>4</sup> Int4 <sub>B,C7-endo</sub> | -1.52      | -0.60          | -2.17      | -0.75      | 0.17           | -1.40      | 1.23             |
| <sup>4</sup> TS5 <sub>B,C7-endo</sub>  | 8.74       | 6.30           | 10.49      | 6.28       | 3.84           | 8.03       | 7.47             |
| <sup>4</sup> Int5 <sub>B,C7-endo</sub> | -24.64     | -24.82         | -22.19     | -27.05     | -27.22         | -24.59     | -27.92           |
| Pathway C7-exo:                        |            |                |            |            |                |            |                  |
| <sup>2</sup> TS4 <sub>B,C7-exo</sub>   | 3.01       | 2.81           | 4.13       | -0.44      | -0.64          | 0.68       | 9.56             |
| <sup>2</sup> Int4 <sub>B,C7-exo</sub>  | 0.08       | 0.58           | -0.13      | -0.32      | 0.19           | -0.53      | -0.36            |
| <sup>2</sup> TS5 <sub>B,C7-exo</sub>   | 3.47       | 1.39           | 1.13       | 4.82       | 2.73           | 2.48       | 10.77            |
| <sup>4</sup> Int5 <sub>B,C7-exo</sub>  | -61.01     | -59.89         | -59.82     | -61.98     | -60.86         | -60.79     | -64.44           |
| <sup>4</sup> TS4 <sub>B,C7-exo</sub>   | 2.94       | 2.75           | 3.64       | 0.24       | 0.04           | 0.93       | 10.74            |
| <sup>4</sup> Int4 <sub>B,C7-exo</sub>  | 0.08       | 0.58           | -0.54      | -0.31      | 0.20           | -0.93      | -0.34            |
| <sup>4</sup> TS5 <sub>B,C7-exo</sub>   | 7.40       | 4.56           | 5.31       | 7.30       | 4.46           | 5.21       | 10.41            |
| <sup>4</sup> Int5 <sub>B,C7-exo</sub>  | -52.45     | -52.68         | -52.29     | -55.88     | -56.11         | -55.72     | -56.82           |

**Table S18: Group spin densities and charges of local minima and transition states for Pathway2-C7 as calculated with B3LYP/BS1 with model B in Gaussian-09.**

**Spin density:**

| Species                                | $\rho_{\text{Fe}}$ | $\rho_{\text{Porp}}$ | $\rho_{\text{SH}}$ | $\rho_{\text{O}}$ | $\rho_{\text{OH}}$ | $\rho_{\text{NO}_2}$ | $\rho_{\text{Subs}}$ | $\rho_{\text{Subs}(\text{NO}_2)}$ | $\rho_{\text{Lig1}}$ | $\rho_{\text{Arg}}$ | $\rho_{\text{PheGlu}}$ | $\rho_{\text{Tyr}}$ | $\rho_{\text{Total}}$ |
|----------------------------------------|--------------------|----------------------|--------------------|-------------------|--------------------|----------------------|----------------------|-----------------------------------|----------------------|---------------------|------------------------|---------------------|-----------------------|
| Pathway C7-endo:                       |                    |                      |                    |                   |                    |                      |                      |                                   |                      |                     |                        |                     |                       |
| <sup>2</sup> TS4 <sub>B,C7-endo</sub>  | 1.27               | -0.07                | -0.02              | 0.82              |                    |                      |                      | -1.00                             | 0.00                 | 0.00                | 0.00                   | 0.00                | 1.00                  |
| <sup>2</sup> Int5 <sub>B,C7-endo</sub> | 1.28               | -0.07                | -0.03              | 0.81              |                    |                      |                      | -0.99                             | 0.00                 | 0.00                | 0.00                   | 0.00                | 1.00                  |
| <sup>2</sup> TS5 <sub>B,C7-endo</sub>  | 1.24               | -0.07                | -0.02              |                   | 0.63               | 0.00                 |                      | -0.78                             | 0.00                 | 0.00                | 0.00                   | 0.00                | 1.00                  |
| <sup>2</sup> Int5 <sub>B,C7-endo</sub> | 0.90               | -0.05                | -0.01              |                   | 0.17               | 0.00                 |                      | -0.01                             | 0.00                 | 0.00                | 0.00                   | 0.00                | 1.00                  |
| <sup>4</sup> TS4 <sub>B,C7-endo</sub>  | 1.27               | -0.07                | -0.02              | 0.82              |                    |                      |                      | 0.00                              | 1.00                 | 0.00                | 0.00                   | 0.00                | 3.00                  |
| <sup>4</sup> Int5 <sub>B,C7-endo</sub> | 1.28               | -0.07                | -0.02              | 0.81              |                    |                      |                      | 1.00                              | 0.00                 | 0.00                | 0.00                   | 0.00                | 3.00                  |
| <sup>4</sup> TS5 <sub>B,C7-endo</sub>  | 1.51               | -0.09                | -0.03              |                   | 0.59               | 0.00                 |                      | 1.02                              | 0.00                 | 0.00                | 0.00                   | 0.00                | 3.00                  |
| <sup>4</sup> Int5 <sub>B,C7-endo</sub> | 0.93               | 1.56                 | 0.10               |                   | 0.11               |                      |                      | 0.30                              | 0.00                 | 0.00                | 0.00                   | 0.00                | 3.00                  |
| Pathway C7-exo:                        |                    |                      |                    |                   |                    |                      |                      |                                   |                      |                     |                        |                     |                       |
| <sup>2</sup> TS4 <sub>B,C7-exo</sub>   | 1.27               | -0.07                | -0.02              | 0.82              |                    | 0.00                 | -1.00                |                                   | 0.00                 | 0.00                | 0.00                   | 0.00                | 1.00                  |
| <sup>2</sup> Int5 <sub>B,C7-exo</sub>  | 1.27               | -0.07                | -0.02              | 0.82              |                    | 0.00                 | -1.00                |                                   | 0.00                 | 0.00                | 0.00                   | 0.00                | 1.00                  |
| <sup>2</sup> TS5 <sub>B,C7-exo</sub>   | 1.11               | -0.05                | -0.01              |                   | 0.49               |                      |                      | -0.54                             | 0.00                 | 0.00                | 0.00                   | 0.00                | 1.00                  |
| <sup>4</sup> Int5 <sub>B,C7-exo</sub>  | 1.17               | -0.07                | -0.11              |                   | 0.00               |                      |                      | 0.00                              | 0.00                 | 0.00                | 0.00                   | 0.00                | 1.00                  |
| <sup>4</sup> TS4 <sub>B,C7-exo</sub>   | 1.27               | -0.07                | -0.02              | 0.82              |                    | 0.00                 | 1.00                 |                                   | 0.00                 | 0.00                | 0.00                   | 0.00                | 3.00                  |
| <sup>4</sup> Int5 <sub>B,C7-exo</sub>  | 1.23               | -0.06                | -0.02              | 0.84              |                    | 0.00                 | 1.01                 |                                   | 0.00                 | 0.00                | 0.00                   | 0.00                | 3.00                  |
| <sup>4</sup> TS5 <sub>B,C7-exo</sub>   | 1.62               | -0.10                | -0.01              |                   | 0.48               |                      |                      | 1.01                              | 0.00                 | 0.00                | 0.00                   | 0.00                | 3.00                  |
| <sup>4</sup> Int5 <sub>B,C7-exo</sub>  | 2.60               | -0.03                | 0.18               |                   | 0.24               |                      |                      | 0.02                              | 0.00                 | 0.00                | 0.00                   | 0.00                | 3.00                  |

Charge :

| Species                                | Fe   | Porp  | SH    | O     | OH    | NO2  | Subs | Subs(NO <sub>2</sub> ) | Lig1 | Arg  | PheGlu | Tyr   | Total |
|----------------------------------------|------|-------|-------|-------|-------|------|------|------------------------|------|------|--------|-------|-------|
| <sup>2</sup> TS4 <sub>B,C7-endo</sub>  | 0.42 | -1.05 | -0.44 | -0.50 |       |      |      | 0.07                   | 0.50 | 0.70 | -0.62  | -0.08 | -1.00 |
| <sup>2</sup> Int5 <sub>B,C7-endo</sub> | 0.43 | -1.06 | -0.44 | -0.51 |       |      |      | 0.07                   | 0.49 | 0.69 | -0.61  | -0.06 | -1.00 |
| <sup>2</sup> TS5 <sub>B,C7-endo</sub>  | 0.41 | -1.08 | -0.38 |       | -0.42 |      |      | -0.04                  | 0.50 | 0.71 | -0.62  | -0.07 | -1.00 |
| <sup>2</sup> Int5 <sub>B,C7-endo</sub> | 0.38 | -1.18 | -0.49 |       | -0.51 |      |      | 0.29                   | 0.50 | 0.70 | -0.62  | -0.07 | -1.00 |
| <sup>4</sup> TS4 <sub>B,C7-endo</sub>  | 0.42 | -1.05 | -0.44 | -0.50 |       |      |      | 0.07                   | 0.50 | 0.70 | -0.62  | -0.08 | -1.00 |
| <sup>4</sup> Int5 <sub>B,C7-endo</sub> | 0.43 | -1.05 | -0.46 | -0.50 |       |      |      | 0.08                   | 0.50 | 0.69 | -0.62  | -0.07 | -1.00 |
| <sup>4</sup> TS5 <sub>B,C7-endo</sub>  | 0.44 | -1.00 | -0.35 |       | -0.43 |      |      | -0.17                  | 0.50 | 0.71 | -0.62  | -0.07 | -1.00 |
| <sup>4</sup> Int5 <sub>B,C7-endo</sub> | 0.32 | -1.00 | -0.30 |       | -0.56 |      |      | 0.04                   | 0.48 | 0.70 | -0.62  | -0.06 | -1.00 |
| <sup>2</sup> TS4 <sub>B,C7-exo</sub>   | 0.42 | -1.05 | -0.44 | -0.50 |       | 0.00 | 0.07 |                        | 0.50 | 0.70 | -0.62  | -0.08 | -1.00 |
| <sup>2</sup> Int5 <sub>B,C7-exo</sub>  | 0.41 | -1.04 | -0.47 | -0.49 |       |      |      | 0.10                   | 0.50 | 0.69 | -0.64  | -0.07 | -1.00 |
| <sup>2</sup> TS5 <sub>B,C7-exo</sub>   | 0.40 | -1.11 | -0.39 |       | -0.48 |      |      | 0.09                   | 0.49 | 0.71 | -0.64  | -0.06 | -1.00 |
| <sup>2</sup> Int5 <sub>B,C7-exo</sub>  | 0.43 | -1.13 | -0.48 |       | -0.58 |      |      | 0.26                   | 0.50 | 0.71 | -0.63  | -0.07 | -1.00 |
| <sup>4</sup> TS4 <sub>B,C7-exo</sub>   | 0.42 | -1.05 | -0.44 | -0.50 |       |      |      | 0.07                   | 0.50 | 0.70 | -0.62  | -0.08 | -1.00 |
| <sup>4</sup> Int5 <sub>B,C7-exo</sub>  | 0.42 | -1.07 | -0.49 | -0.46 |       |      |      | 0.10                   | 0.50 | 0.69 | -0.63  | -0.07 | -1.00 |
| <sup>4</sup> TS5 <sub>B,C7-exo</sub>   | 0.45 | -0.96 | -0.31 |       | -0.49 |      |      | -0.17                  | 0.48 | 0.71 | -0.64  | -0.06 | -1.00 |
| <sup>4</sup> Int5 <sub>B,C7-exo</sub>  | 0.45 | -1.15 | -0.43 |       | -0.63 |      |      | 0.24                   | 0.50 | 0.71 | -0.62  | -0.07 | -1.00 |

**Table S19: Group spin densities and charges of local minima and transition states for Pathway2-C7 as calculated with B3LYP/BS2 with model B in Gaussian-09.**

**Spin density:**

| Species                                | $\rho_{\text{Fe}}$ | $\rho_{\text{Porp}}$ | $\rho_{\text{SH}}$ | $\rho_{\text{O}}$ | $\rho_{\text{OH}}$ | $\rho_{\text{NO}_2}$ | $\rho_{\text{Subs}}$ | $\rho_{\text{Subs}(\text{NO}_2)}$ | $\rho_{\text{Lig1}}$ | $\rho_{\text{Arg}}$ | $\rho_{\text{PheGlu}}$ | $\rho_{\text{Tyr}}$ | $\rho_{\text{Total}}$ |
|----------------------------------------|--------------------|----------------------|--------------------|-------------------|--------------------|----------------------|----------------------|-----------------------------------|----------------------|---------------------|------------------------|---------------------|-----------------------|
| Pathway C7-endo:                       |                    |                      |                    |                   |                    |                      |                      |                                   |                      |                     |                        |                     |                       |
| <sup>2</sup> TS4 <sub>B,C7-endo</sub>  | 1.43               | -0.23                | -0.03              | 0.83              |                    |                      |                      | -1.00                             | 0.00                 | 0.00                | 0.00                   | 0.00                | 1.00                  |
| <sup>2</sup> Int5 <sub>B,C7-endo</sub> | 1.42               | -0.22                | -0.03              | 0.82              |                    |                      |                      | -0.99                             | 0.00                 | 0.00                | 0.00                   | 0.00                | 1.00                  |
| <sup>2</sup> TS5 <sub>B,C7-endo</sub>  | 1.50               | -0.25                | -0.04              |                   | 0.66               | 0.00                 |                      | -0.87                             | 0.00                 | 0.00                | 0.00                   | 0.00                | 1.00                  |
| <sup>2</sup> Int5 <sub>B,C7-endo</sub> | 1.11               | -0.18                | 0.00               |                   | 0.08               | 0.00                 |                      | -0.01                             | 0.00                 | 0.00                | 0.00                   | 0.00                | 1.00                  |
| <sup>4</sup> TS4 <sub>B,C7-endo</sub>  | 1.42               | -0.22                | -0.03              | 0.83              |                    |                      |                      | 0.00                              | 1.01                 | 0.00                | 0.00                   | 0.00                | 3.00                  |
| <sup>4</sup> Int5 <sub>B,C7-endo</sub> | 1.41               | -0.20                | -0.03              | 0.82              |                    |                      |                      | 1.00                              | 0.00                 | 0.00                | 0.00                   | 0.00                | 3.00                  |
| <sup>4</sup> TS5 <sub>B,C7-endo</sub>  | 1.90               | -0.28                | -0.05              |                   | 0.51               | 0.00                 |                      | 0.91                              | 0.00                 | 0.00                | 0.00                   | 0.00                | 3.00                  |
| <sup>4</sup> Int5 <sub>B,C7-endo</sub> | 0.97               | 0.79                 | 0.13               |                   | 0.12               |                      |                      | 0.98                              | 0.00                 | 0.00                | 0.00                   | 0.00                | 3.00                  |
| Pathway C7-exo:                        |                    |                      |                    |                   |                    |                      |                      |                                   |                      |                     |                        |                     |                       |
| <sup>2</sup> TS4 <sub>B,C7-exo</sub>   | 1.55               | -0.27                | -0.04              | 0.77              |                    | 0.00                 | -1.01                |                                   | 0.00                 | 0.00                | 0.00                   | 0.00                | 1.00                  |
| <sup>2</sup> Int5 <sub>B,C7-exo</sub>  | 1.42               | -0.23                | -0.03              | 0.83              |                    | 0.00                 | -0.99                |                                   | 0.00                 | 0.00                | 0.00                   | 0.00                | 1.00                  |
| <sup>2</sup> TS5 <sub>B,C7-exo</sub>   | 1.53               | -0.27                | -0.04              |                   | 0.68               |                      |                      | -0.89                             | 0.00                 | 0.00                | 0.00                   | 0.00                | 1.00                  |
| <sup>2</sup> Int5 <sub>B,C7-exo</sub>  | 1.19               | -0.20                | -0.06              |                   | 0.07               |                      |                      | 0.00                              | 0.00                 | 0.00                | 0.00                   | 0.00                | 1.00                  |
| <sup>4</sup> TS4 <sub>B,C7-exo</sub>   | 1.55               | -0.27                | -0.04              | 0.78              |                    | 0.00                 | 0.99                 |                                   | 0.00                 | 0.00                | 0.00                   | 0.00                | 3.00                  |
| <sup>4</sup> Int5 <sub>B,C7-exo</sub>  | 1.40               | -0.21                | -0.03              | 0.84              |                    | 0.00                 | 1.00                 |                                   | 0.00                 | 0.00                | 0.00                   | 0.00                | 3.00                  |
| <sup>4</sup> TS5 <sub>B,C7-exo</sub>   | 1.72               | -0.30                | -0.04              |                   | 0.62               |                      |                      | 1.00                              | 0.00                 | 0.00                | 0.00                   | 0.00                | 3.00                  |
| <sup>4</sup> Int5 <sub>B,C7-exo</sub>  | 2.99               | -0.32                | 0.14               |                   | 0.20               |                      |                      | 0.00                              | 0.00                 | 0.00                | 0.00                   | 0.00                | 3.00                  |

Charge :

| Species                                | Fe    | Porp | SH    | O     | OH   | NO2  | Subs  | Subs(NO <sub>2</sub> ) | Lig1 | Arg  | PheGlu | Tyr  | Total |
|----------------------------------------|-------|------|-------|-------|------|------|-------|------------------------|------|------|--------|------|-------|
| Pathway C7-endo:                       |       |      |       |       |      |      |       |                        |      |      |        |      |       |
| <sup>2</sup> TS4 <sub>B,C7-endo</sub>  | -2.72 | 1.21 | -0.42 | -0.12 |      |      |       | -0.10                  | 0.96 | 1.02 | -0.84  | 0.03 | -1.00 |
| <sup>2</sup> Int5 <sub>B,C7-endo</sub> | -2.60 | 1.11 | -0.47 | -0.09 |      |      |       | -0.09                  | 0.96 | 1.01 | -0.86  | 0.03 | -1.00 |
| <sup>2</sup> TS5 <sub>B,C7-endo</sub>  | -3.89 | 2.00 | -0.27 |       | 0.72 |      |       | -0.75                  | 1.01 | 1.04 | -0.88  | 0.03 | -1.00 |
| <sup>2</sup> Int5 <sub>B,C7-endo</sub> | -2.02 | 0.44 | -0.43 |       | 0.07 |      |       | -0.22                  | 0.99 | 1.01 | -0.85  | 0.00 | -1.00 |
| <sup>4</sup> TS4 <sub>B,C7-endo</sub>  | -2.72 | 1.21 | -0.42 | -0.12 |      |      |       | -0.10                  | 0.96 | 1.02 | -0.84  | 0.03 | -1.00 |
| <sup>4</sup> Int5 <sub>B,C7-endo</sub> | -2.60 | 1.11 | -0.47 | -0.09 |      |      |       | -0.09                  | 0.95 | 1.01 | -0.86  | 0.03 | -1.00 |
| <sup>4</sup> TS5 <sub>B,C7-endo</sub>  | -3.61 | 1.88 | -0.37 |       | 0.75 |      |       | -0.83                  | 1.02 | 1.03 | -0.89  | 0.03 | -1.00 |
| <sup>4</sup> Int5 <sub>B,C7-endo</sub> | -2.08 | 1.15 | -0.27 |       | 0.12 |      |       | -1.03                  | 0.96 | 1.00 | -0.86  | 0.01 | -1.00 |
| Pathway C7-exo:                        |       |      |       |       |      |      |       |                        |      |      |        |      |       |
| <sup>2</sup> TS4 <sub>B,C7-exo</sub>   | -4.89 | 3.00 | -0.22 | 0.30  |      | 0.00 | -0.32 |                        | 1.01 | 0.87 | -0.91  | 0.17 | -1.00 |
| <sup>2</sup> Int5 <sub>B,C7-exo</sub>  | -2.66 | 1.18 | -0.43 | -0.13 |      |      |       | -0.12                  | 0.96 | 1.02 | -0.84  | 0.03 | -1.00 |
| <sup>2</sup> TS5 <sub>B,C7-exo</sub>   | -4.06 | 2.28 | -0.30 |       | 0.87 |      |       | -0.61                  | 0.80 | 0.94 | -0.97  | 0.05 | -1.00 |
| <sup>2</sup> Int5 <sub>B,C7-exo</sub>  | -2.87 | 1.18 | -0.49 |       | 0.32 |      |       | -0.19                  | 0.99 | 0.89 | -0.89  | 0.05 | -1.00 |
| <sup>4</sup> TS4 <sub>B,C7-exo</sub>   | -4.80 | 2.91 | -0.23 | 0.29  |      |      |       | -0.32                  | 1.01 | 0.85 | -0.90  | 0.19 | -1.00 |
| <sup>4</sup> Int5 <sub>B,C7-exo</sub>  | -3.17 | 1.58 | -0.43 | 0.06  |      |      |       | -0.12                  | 0.93 | 1.01 | -0.88  | 0.03 | -1.00 |
| <sup>4</sup> TS5 <sub>B,C7-exo</sub>   | -4.15 | 2.40 | -0.27 |       | 0.88 |      |       | -0.69                  | 0.80 | 0.94 | -0.97  | 0.05 | -1.00 |
| <sup>4</sup> Int5 <sub>B,C7-exo</sub>  | -2.71 | 1.49 | -0.70 |       | 0.05 |      |       | -0.19                  | 0.95 | 0.92 | -0.87  | 0.05 | -1.00 |

**Table S20: Absolute (free) energies (in au) of local minima and transition states for Pathway2-C5 as calculated with B3LYP with model B in Gaussian-09.**

| Model B-C5                             | E [au]       | ZPE [au] | G [au]       | E [au]       | E <sub>disp</sub> [au] |
|----------------------------------------|--------------|----------|--------------|--------------|------------------------|
|                                        | [BS1,au]     | [BS1,au] | [BS1,au]     | [BS2,au]     | [BS2,au]               |
| Pathway C5-endo:                       |              |          |              |              |                        |
| <sup>2</sup> TS4 <sub>B,C5-endo</sub>  | -6677.067924 | 2.050186 | -6675.222340 | -6678.814867 | 0.378108               |
| <sup>2</sup> Int4 <sub>B,C5-endo</sub> | -6677.055504 | 2.050010 | -6675.206135 | -6678.802865 | 0.370146               |
| <sup>2</sup> TS5 <sub>B,C5-endo</sub>  | -6677.045160 | 2.046361 | -6675.198212 | -6678.790277 | 0.382804               |
| <sup>2</sup> Int5 <sub>B,C5-endo</sub> | -6677.155874 | 2.051765 | -6675.306932 | -6678.900861 | 0.374702               |
| <sup>4</sup> TS4 <sub>B,C5-endo</sub>  | -6677.067899 | 2.050205 | -6675.222560 | -6678.814824 | 0.378121               |
| <sup>4</sup> Int4 <sub>B,C5-endo</sub> | -6677.067903 | 2.050629 | -6675.222416 | -6678.814570 | 0.378035               |
| <sup>4</sup> TS5 <sub>B,C5-endo</sub>  | -6677.037375 | 2.045225 | -6675.190434 | -6678.785973 | 0.382386               |
| <sup>4</sup> Int5 <sub>B,C5-endo</sub> | -6677.098254 | 2.047838 | -6675.254273 | -6678.842613 | 0.375013               |
| Pathway C5-exo:                        |              |          |              |              |                        |
| <sup>2</sup> TS4 <sub>B,C5-exo</sub>   | -6677.052930 | 2.049042 | -6675.205705 | -6678.804892 | 0.388247               |
| <sup>2</sup> Int4 <sub>B,C5-exo</sub>  | -6677.052982 | 2.049708 | -6675.204256 | -6678.807859 | 0.384344               |
| <sup>2</sup> TS5 <sub>B,C5-exo</sub>   | -6677.029995 | 2.044736 | -6675.183591 | -6678.774948 | 0.398334               |
| <sup>2</sup> Int5 <sub>B,C5-exo</sub>  | -6677.143645 | 2.050014 | -6675.292919 | -6678.886361 | 0.390455               |
| <sup>4</sup> TS4 <sub>B,C5-exo</sub>   | -6677.052943 | 2.049062 | -6675.206010 | -6678.804888 | 0.388357               |
| <sup>4</sup> Int4 <sub>B,C5-exo</sub>  | -6677.052994 | 2.049684 | -6675.205287 | -6678.806894 | 0.385366               |
| <sup>4</sup> TS5 <sub>B,C5-exo</sub>   | -6677.025573 | 2.043977 | -6675.179482 | -6678.772649 | 0.396828               |
| <sup>4</sup> Int5 <sub>B,C5-exo</sub>  | -6677.086070 | 2.045920 | -6675.241170 | -6678.828365 | 0.390307               |

**Table S21: Relative (free) energies (in kcal mol<sup>-1</sup>) of local minima and transition states for Pathway2-C5 as calculated with B3LYP with model B in Gaussian-09.**

| Model B-C5                             | $\Delta E$ | $\Delta E+ZPE$ | $\Delta G$ | $\Delta E$ | $\Delta E+ZPE$ | $\Delta G$ |
|----------------------------------------|------------|----------------|------------|------------|----------------|------------|
|                                        | BS1        | BS1            | BS1        | BS2        | BS2            | BS2        |
| Pathway C5-endo:                       |            |                |            |            |                |            |
| <sup>2</sup> TS4 <sub>B,C5-endo</sub>  | -4.39      | -3.94          | -6.28      | -5.14      | -4.69          | -7.02      |
| <sup>2</sup> Int4 <sub>B,C5-endo</sub> | 3.40       | 3.74           | 3.89       | 2.39       | 2.73           | 2.88       |
| <sup>2</sup> TS5 <sub>B,C5-endo</sub>  | 9.89       | 7.94           | 8.87       | 10.29      | 8.34           | 9.26       |
| <sup>2</sup> Int5 <sub>B,C5-endo</sub> | -59.58     | -58.14         | -59.36     | -59.11     | -57.67         | -58.88     |
| <sup>4</sup> TS4 <sub>B,C5-endo</sub>  | -4.38      | -3.92          | -6.41      | -5.12      | -4.66          | -7.15      |
| <sup>4</sup> Int4 <sub>B,C5-endo</sub> | -4.38      | -3.65          | -6.32      | -4.96      | -4.23          | -6.90      |
| <sup>4</sup> TS5 <sub>B,C5-endo</sub>  | 14.78      | 12.11          | 13.75      | 12.99      | 10.32          | 11.96      |
| <sup>4</sup> Int5 <sub>B,C5-endo</sub> | -23.43     | -24.45         | -26.31     | -22.55     | -23.58         | -25.44     |
| Pathway C5-exo:                        |            |                |            |            |                |            |
| <sup>2</sup> TS4 <sub>B,C5-exo</sub>   | 5.01       | 4.75           | 4.16       | 1.12       | 0.85           | 0.26       |
| <sup>2</sup> Int4 <sub>B,C5-exo</sub>  | 4.98       | 5.13           | 5.07       | -0.75      | -0.60          | -0.66      |
| <sup>2</sup> TS5 <sub>B,C5-exo</sub>   | 19.41      | 16.44          | 18.04      | 19.91      | 16.94          | 18.54      |
| <sup>2</sup> Int5 <sub>B,C5-exo</sub>  | -51.91     | -51.57         | -50.56     | -50.01     | -49.66         | -48.66     |
| <sup>4</sup> TS4 <sub>B,C5-exo</sub>   | 5.01       | 4.75           | 3.97       | 1.12       | 0.86           | 0.08       |
| <sup>4</sup> Int4 <sub>B,C5-exo</sub>  | 4.97       | 5.11           | 4.43       | -0.14      | -0.01          | -0.69      |
| <sup>4</sup> TS5 <sub>B,C5-exo</sub>   | 22.18      | 18.73          | 20.62      | 21.35      | 17.90          | 19.79      |
| <sup>4</sup> Int5 <sub>B,C5-exo</sub>  | -15.78     | -18.01         | -18.09     | -13.61     | -15.84         | -15.92     |



**Table S22: Group spin densities and charges of local minima and transition states for Pathway2-C5 as calculated with B3LYP/BS1 with model B in Gaussian-09.**

**Spin density:**

| Species                                | $\rho_{\text{Fe}}$ | $\rho_{\text{Porp}}$ | $\rho_{\text{SH}}$ | $\rho_{\text{O}}$ | $\rho_{\text{OH}}$ | $\rho_{\text{NO}_2}$ | $\rho_{\text{Subs}}$ | $\rho_{\text{Subs}(\text{NO}_2)}$ | $\rho_{\text{Lig1}}$ | $\rho_{\text{Arg}}$ | $\rho_{\text{PheGlu}}$ | $\rho_{\text{Tyr}}$ | $\rho_{\text{Total}}$ |
|----------------------------------------|--------------------|----------------------|--------------------|-------------------|--------------------|----------------------|----------------------|-----------------------------------|----------------------|---------------------|------------------------|---------------------|-----------------------|
| Pathway C5-endo:                       |                    |                      |                    |                   |                    |                      |                      |                                   |                      |                     |                        |                     |                       |
| <sup>2</sup> TS4 <sub>B,C5-endo</sub>  | 1.35               | -0.08                | -0.02              | 0.75              |                    | 0.00                 | -1.00                |                                   | 0.00                 | 0.00                | 0.00                   | 0.00                | 1.00                  |
| <sup>2</sup> Int4 <sub>B,C5-endo</sub> | 1.06               | -0.07                | -0.01              | 1.02              |                    |                      |                      | -1.00                             | 0.00                 | 0.00                | 0.00                   | 0.00                | 1.00                  |
| <sup>2</sup> TS5 <sub>B,C5-endo</sub>  | 1.00               | -0.05                | -0.02              |                   | 0.53               |                      |                      | -0.46                             | 0.00                 | 0.00                | 0.00                   | 0.00                | 1.00                  |
| <sup>2</sup> Int5 <sub>B,C5-endo</sub> | 0.90               | -0.05                | 0.00               |                   | 0.16               | 0.00                 |                      | -0.01                             | 0.00                 | 0.00                | 0.00                   | 0.00                | 1.00                  |
| <sup>4</sup> TS4 <sub>B,C5-endo</sub>  | 1.36               | -0.08                | -0.02              | 0.75              |                    | 0.00                 | 1.00                 |                                   | 0.00                 | 0.00                | 0.00                   | 0.00                | 3.00                  |
| <sup>4</sup> Int4 <sub>B,C5-endo</sub> | 1.06               | -0.07                | -0.01              | 1.02              |                    |                      |                      | 1.00                              | 0.00                 | 0.00                | 0.00                   | 0.00                | 3.00                  |
| <sup>4</sup> TS5 <sub>B,C5-endo</sub>  | 1.55               | -0.09                | -0.04              |                   | 0.58               |                      |                      | 0.99                              | 0.00                 | 0.00                | 0.00                   | 0.00                | 3.00                  |
| <sup>4</sup> Int5 <sub>B,C5-endo</sub> | 0.94               | 1.87                 | 0.09               |                   | 0.10               |                      |                      | 0.01                              | 0.00                 | 0.00                | 0.00                   | 0.00                | 3.00                  |
| Pathway C5-exo:                        |                    |                      |                    |                   |                    |                      |                      |                                   |                      |                     |                        |                     |                       |
| <sup>2</sup> TS4 <sub>B,C5-exo</sub>   | 1.38               | -0.08                | -0.03              | 0.72              |                    | 0.00                 | -1.00                |                                   | 0.00                 | 0.00                | 0.00                   | 0.00                | 1.00                  |
| <sup>2</sup> Int4 <sub>B,C5-exo</sub>  | 1.38               | -0.08                | -0.03              | 0.72              |                    |                      |                      | -1.00                             | 0.00                 | 0.00                | 0.00                   | 0.00                | 1.00                  |
| <sup>2</sup> TS5 <sub>B,C5-exo</sub>   | 1.21               | -0.06                | -0.02              |                   | 0.68               |                      |                      | -0.81                             | 0.00                 | 0.00                | 0.00                   | 0.00                | 1.00                  |
| <sup>2</sup> Int5 <sub>B,C5-exo</sub>  | 0.96               | -0.06                | -0.01              |                   | 0.11               |                      |                      | 0.00                              | 0.00                 | 0.00                | 0.00                   | 0.00                | 1.00                  |
| <sup>4</sup> TS4 <sub>B,C5-exo</sub>   | 1.38               | -0.08                | -0.03              | 0.72              |                    | 0.00                 | 1.00                 |                                   | 0.00                 | 0.00                | 0.00                   | 0.00                | 3.00                  |
| <sup>4</sup> Int4 <sub>B,C5-exo</sub>  | 1.38               | -0.08                | -0.03              | 0.72              |                    |                      |                      | 1.00                              | 0.00                 | 0.00                | 0.00                   | 0.00                | 3.00                  |
| <sup>4</sup> TS5 <sub>B,C5-exo</sub>   | 1.78               | -0.10                | -0.02              |                   | 0.49               |                      |                      | 0.84                              | 0.00                 | 0.00                | 0.00                   | 0.00                | 3.00                  |
| <sup>4</sup> Int5 <sub>B,C5-exo</sub>  | 0.92               | 1.87                 | 0.09               |                   | 0.12               |                      |                      | 0.00                              | 0.00                 | 0.00                | 0.00                   | 0.00                | 3.00                  |

**Charge:**

| Species                                | Fe   | Porp  | SH    | O     | OH    | NO2  | Subs | Subs(NO <sub>2</sub> ) | Lig1 | Arg  | PheGlu | Tyr   | Total |
|----------------------------------------|------|-------|-------|-------|-------|------|------|------------------------|------|------|--------|-------|-------|
| Pathway C5-endo:                       |      |       |       |       |       |      |      |                        |      |      |        |       |       |
| <sup>2</sup> TS4 <sub>B,C5-endo</sub>  | 0.44 | -1.02 | -0.40 | -0.55 |       | 0.00 | 0.05 |                        | 0.47 | 0.70 | -0.64  | -0.05 | -1.00 |
| <sup>2</sup> Int4 <sub>B,C5-endo</sub> | 0.34 | -1.15 | -0.35 | -0.46 |       |      |      | 0.09                   | 0.51 | 0.69 | -0.61  | -0.06 | -1.00 |
| <sup>2</sup> TS5 <sub>B,C5-endo</sub>  | 0.37 | -1.16 | -0.46 |       | -0.41 |      |      | 0.16                   | 0.51 | 0.71 | -0.63  | -0.09 | -1.00 |
| <sup>2</sup> Int5 <sub>B,C5-endo</sub> | 0.39 | -1.19 | -0.49 |       | -0.54 |      |      | 0.34                   | 0.49 | 0.70 | -0.61  | -0.08 | -1.00 |
| <sup>4</sup> TS4 <sub>B,C5-endo</sub>  | 0.44 | -1.02 | -0.40 | -0.55 |       | 0.00 | 0.05 |                        | 0.47 | 0.70 | -0.64  | -0.05 | -1.00 |
| <sup>4</sup> Int4 <sub>B,C5-endo</sub> | 0.34 | -1.15 | -0.35 | -0.46 |       |      |      | 0.09                   | 0.51 | 0.69 | -0.61  | -0.06 | -1.00 |
| <sup>4</sup> TS5 <sub>B,C5-endo</sub>  | 0.44 | -0.99 | -0.36 |       | -0.41 |      |      | -0.17                  | 0.51 | 0.71 | -0.64  | -0.09 | -1.00 |
| <sup>4</sup> Int5 <sub>B,C5-endo</sub> | 0.32 | -1.24 | -0.31 |       | -0.51 |      |      | 0.24                   | 0.49 | 0.69 | -0.62  | -0.06 | -1.00 |
| Pathway C5-exo:                        |      |       |       |       |       |      |      |                        |      |      |        |       |       |
| <sup>2</sup> TS4 <sub>B,C5-exo</sub>   | 0.44 | -1.01 | -0.39 | -0.56 |       | 0.00 | 0.02 |                        | 0.50 | 0.69 | -0.66  | -0.04 | -1.00 |
| <sup>2</sup> Int4 <sub>B,C5-exo</sub>  | 0.44 | -1.01 | -0.39 | -0.56 |       |      |      | 0.02                   | 0.50 | 0.69 | -0.65  | -0.04 | -1.00 |
| <sup>2</sup> TS5 <sub>B,C5-exo</sub>   | 0.41 | -1.08 | -0.40 |       | -0.38 |      |      | -0.04                  | 0.52 | 0.69 | -0.64  | -0.07 | -1.00 |
| <sup>2</sup> Int5 <sub>B,C5-exo</sub>  | 0.31 | -1.18 | -0.42 |       | -0.56 |      |      | 0.34                   | 0.53 | 0.69 | -0.64  | -0.07 | -1.00 |
| <sup>4</sup> TS4 <sub>B,C5-exo</sub>   | 0.44 | -1.01 | -0.39 | -0.56 |       | 0.00 | 0.02 |                        | 0.50 | 0.69 | -0.66  | -0.04 | -1.00 |
| <sup>4</sup> Int4 <sub>B,C5-exo</sub>  | 0.44 | -1.01 | -0.39 | -0.56 |       |      |      | 0.02                   | 0.50 | 0.69 | -0.65  | -0.04 | -1.00 |
| <sup>4</sup> TS5 <sub>B,C5-exo</sub>   | 0.49 | -1.03 | -0.42 |       | -0.44 |      |      | -0.09                  | 0.52 | 0.69 | -0.65  | -0.07 | -1.00 |
| <sup>4</sup> Int5 <sub>B,C5-exo</sub>  | 0.28 | -1.25 | -0.30 |       | -0.54 |      |      | 0.30                   | 0.52 | 0.68 | -0.62  | -0.07 | -1.00 |

**Table S23: Group spin densities and charges of local minima and transition states for Pathway2-C5 as calculated with B3LYP/BS2 with model B in Gaussian-09.**

**Spin density:**

| Species                                | $\rho_{\text{Fe}}$ | $\rho_{\text{Porp}}$ | $\rho_{\text{SH}}$ | $\rho_{\text{O}}$ | $\rho_{\text{OH}}$ | $\rho_{\text{NO}_2}$ | $\rho_{\text{Subs}}$ | $\rho_{\text{Subs}(\text{NO}_2)}$ | $\rho_{\text{Lig1}}$ | $\rho_{\text{Arg}}$ | $\rho_{\text{PheGlu}}$ | $\rho_{\text{Tyr}}$ | $\rho_{\text{Total}}$ |
|----------------------------------------|--------------------|----------------------|--------------------|-------------------|--------------------|----------------------|----------------------|-----------------------------------|----------------------|---------------------|------------------------|---------------------|-----------------------|
| Pathway C5-endo:                       |                    |                      |                    |                   |                    |                      |                      |                                   |                      |                     |                        |                     |                       |
| <sup>2</sup> TS4 <sub>B,C5-endo</sub>  | 1.46               | -0.21                | -0.03              | 0.79              |                    | 0.00                 | -1.00                |                                   | 0.00                 | 0.00                | -0.01                  | 0.00                | 1.00                  |
| <sup>2</sup> Int4 <sub>B,C5-endo</sub> | 1.38               | -0.17                | -0.03              | 0.82              |                    |                      |                      | -0.99                             | 0.00                 | 0.00                | 0.00                   | 0.00                | 1.00                  |
| <sup>2</sup> TS5 <sub>B,C5-endo</sub>  | 1.00               | -0.05                | -0.02              |                   | 0.53               |                      |                      | -0.46                             | 0.00                 | 0.00                | 0.00                   | 0.00                | 1.00                  |
| <sup>2</sup> Int5 <sub>B,C5-endo</sub> | 1.10               | -0.18                | 0.00               |                   | 0.08               | 0.00                 |                      | 0.00                              | 0.00                 | 0.00                | 0.00                   | 0.00                | 1.00                  |
| <sup>4</sup> TS4 <sub>B,C5-endo</sub>  | 1.47               | -0.22                | -0.03              | 0.79              |                    | 0.00                 | 0.99                 |                                   | 0.00                 | 0.00                | 0.01                   | 0.00                | 3.00                  |
| <sup>4</sup> Int4 <sub>B,C5-endo</sub> | 1.38               | -0.17                | -0.03              | 0.82              |                    |                      |                      | 1.00                              | 0.00                 | 0.00                | 0.00                   | 0.00                | 3.00                  |
| <sup>4</sup> TS5 <sub>B,C5-endo</sub>  | 1.87               | -0.29                | -0.05              |                   | 0.55               | 0.00                 |                      | 0.91                              | 0.00                 | 0.00                | 0.00                   | 0.00                | 3.00                  |
| <sup>4</sup> Int5 <sub>B,C5-endo</sub> | 0.99               | 1.83                 | 0.09               |                   | 0.10               |                      |                      | -0.01                             | 0.00                 | 0.00                | 0.00                   | 0.00                | 3.00                  |
| Pathway C5-exo:                        |                    |                      |                    |                   |                    |                      |                      |                                   |                      |                     |                        |                     |                       |
| <sup>2</sup> TS4 <sub>B,C5-exo</sub>   | 1.56               | -0.27                | -0.04              | 0.77              |                    | 0.00                 | -1.01                |                                   | 0.00                 | 0.00                | -0.01                  | 0.00                | 1.00                  |
| <sup>2</sup> Int4 <sub>B,C5-exo</sub>  | 1.55               | -0.26                | -0.04              | 0.77              |                    |                      |                      | -1.01                             | 0.00                 | 0.00                | 0.00                   | 0.00                | 1.00                  |
| <sup>2</sup> TS5 <sub>B,C5-exo</sub>   | 1.41               | -0.20                | -0.03              |                   | 0.70               |                      |                      | -0.89                             | 0.00                 | 0.00                | 0.00                   | 0.00                | 1.00                  |
| <sup>2</sup> Int5 <sub>B,C5-exo</sub>  | 1.09               | -0.18                | 0.01               |                   | 0.09               |                      |                      | -0.01                             | 0.00                 | 0.00                | 0.00                   | 0.00                | 1.00                  |
| <sup>4</sup> TS4 <sub>B,C5-exo</sub>   | 1.57               | -0.28                | -0.04              | 0.77              |                    | 0.00                 | 0.99                 |                                   | 0.00                 | 0.00                | 0.00                   | 0.00                | 3.00                  |
| <sup>4</sup> Int4 <sub>B,C5-exo</sub>  | 1.55               | -0.27                | -0.04              | 0.77              |                    |                      |                      | 0.99                              | 0.00                 | 0.00                | 0.00                   | 0.00                | 3.00                  |
| <sup>4</sup> TS5 <sub>B,C5-exo</sub>   | 1.86               | -0.23                | -0.04              |                   | 0.54               |                      |                      | 0.87                              | 0.00                 | 0.00                | 0.00                   | 0.00                | 3.00                  |
| <sup>4</sup> Int5 <sub>B,C5-exo</sub>  | 0.92               | 1.87                 | 0.09               |                   | 0.12               |                      |                      | 0.00                              | 0.00                 | 0.00                | 0.00                   | 0.00                | 3.00                  |

Charge:

| Species                                | Fe    | Porp  | SH    | O     | OH    | NO2  | Subs  | Subs(NO <sub>2</sub> ) | Lig1 | Arg  | PheGlu | Tyr   | Total |
|----------------------------------------|-------|-------|-------|-------|-------|------|-------|------------------------|------|------|--------|-------|-------|
| Pathway C5-endo:                       |       |       |       |       |       |      |       |                        |      |      |        |       |       |
| <sup>2</sup> TS4 <sub>B,C5-endo</sub>  | -2.73 | 1.29  | -0.50 | 0.12  |       | 0.00 | -0.13 |                        | 0.94 | 0.93 | -0.94  | 0.03  | -1.00 |
| <sup>2</sup> Int4 <sub>B,C5-endo</sub> | -1.76 | 0.47  | -0.59 | -0.10 |       |      |       | -0.28                  | 1.05 | 1.06 | -0.87  | 0.03  | -1.00 |
| <sup>2</sup> TS5 <sub>B,C5-endo</sub>  | 0.37  | -1.16 | -0.46 |       | -0.41 |      |       | 0.16                   | 0.51 | 0.71 | -0.63  | -0.09 | -1.00 |
| <sup>2</sup> Int5 <sub>B,C5-endo</sub> | -1.83 | 0.27  | -0.48 |       | 0.28  |      |       | -0.54                  | 1.05 | 1.07 | -0.86  | 0.02  | -1.00 |
| <sup>4</sup> TS4 <sub>B,C5-endo</sub>  | -2.73 | 1.29  | -0.50 | 0.11  |       | 0.00 | -0.14 |                        | 0.94 | 0.93 | -0.94  | 0.03  | -1.00 |
| <sup>4</sup> Int4 <sub>B,C5-endo</sub> | -1.75 | 0.47  | -0.60 | -0.10 |       |      |       | -0.29                  | 1.05 | 1.06 | -0.86  | 0.03  | -1.00 |
| <sup>4</sup> TS5 <sub>B,C5-endo</sub>  | 0.44  | -0.99 | -0.36 |       | -0.41 |      |       | -0.17                  | 0.51 | 0.71 | -0.64  | -0.09 | -1.00 |
| <sup>4</sup> Int5 <sub>B,C5-endo</sub> | -1.80 | 0.17  | -0.41 |       | 0.29  |      |       | -0.55                  | 1.06 | 1.07 | -0.86  | 0.03  | -1.00 |
| Pathway C5-exo:                        |       |       |       |       |       |      |       |                        |      |      |        |       |       |
| <sup>2</sup> TS4 <sub>B,C5-exo</sub>   | -4.79 | 2.97  | -0.20 | 0.27  |       | 0.00 | -0.31 |                        | 1.01 | 0.92 | -0.99  | 0.12  | -1.00 |
| <sup>2</sup> Int4 <sub>B,C5-exo</sub>  | -4.50 | 2.74  | -0.23 | 0.26  |       |      |       | -0.31                  | 1.01 | 0.90 | -0.99  | 0.12  | -1.00 |
| <sup>2</sup> TS5 <sub>B,C5-exo</sub>   | -2.34 | 1.15  | -0.59 |       | 0.38  |      |       | -0.30                  | 0.93 | 0.57 | -0.85  | 0.05  | -1.00 |
| <sup>2</sup> Int5 <sub>B,C5-exo</sub>  | -1.61 | 0.35  | -0.48 |       | 0.22  |      |       | -0.52                  | 0.91 | 0.91 | -0.83  | 0.04  | -1.00 |
| <sup>4</sup> TS4 <sub>B,C5-exo</sub>   | -4.80 | 2.98  | -0.19 | 0.27  |       | 0.00 | -0.31 |                        | 1.01 | 0.92 | -0.99  | 0.13  | -1.00 |
| <sup>4</sup> Int4 <sub>B,C5-exo</sub>  | -4.50 | 2.74  | -0.23 | 0.25  |       |      |       | -0.31                  | 1.01 | 0.90 | -0.99  | 0.12  | -1.00 |
| <sup>4</sup> TS5 <sub>B,C5-exo</sub>   | -3.45 | 1.99  | -0.36 |       | 0.54  |      |       | -0.63                  | 0.93 | 0.95 | -1.00  | 0.02  | -1.00 |
| <sup>4</sup> Int5 <sub>B,C5-exo</sub>  | 0.28  | -1.25 | -0.30 |       | -0.54 |      |       | 0.30                   | 0.52 | 0.68 | -0.62  | -0.07 | -1.00 |

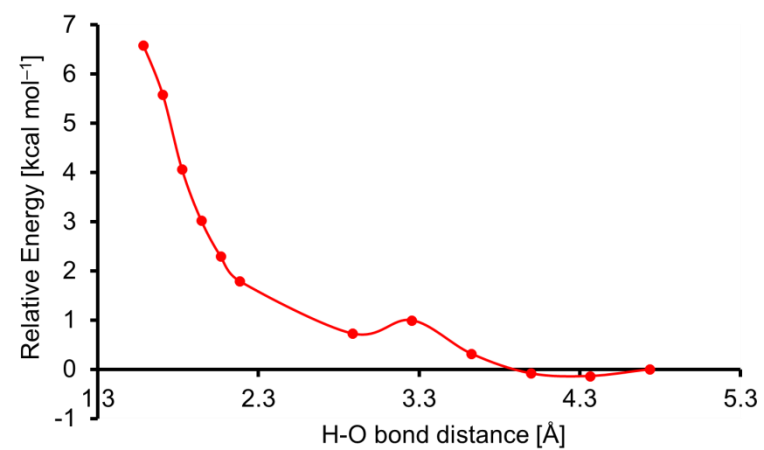

**Figure S26: UB3LYP/BS1 geometry scan for proton transfer for Pathway C4-exo between the substrate to apical oxo of P450, as obtained in Gaussian-09. All points refer to a full geometry optimization. Energies are relative to <sup>2</sup>Int4<sub>C4-oxo</sub>.**

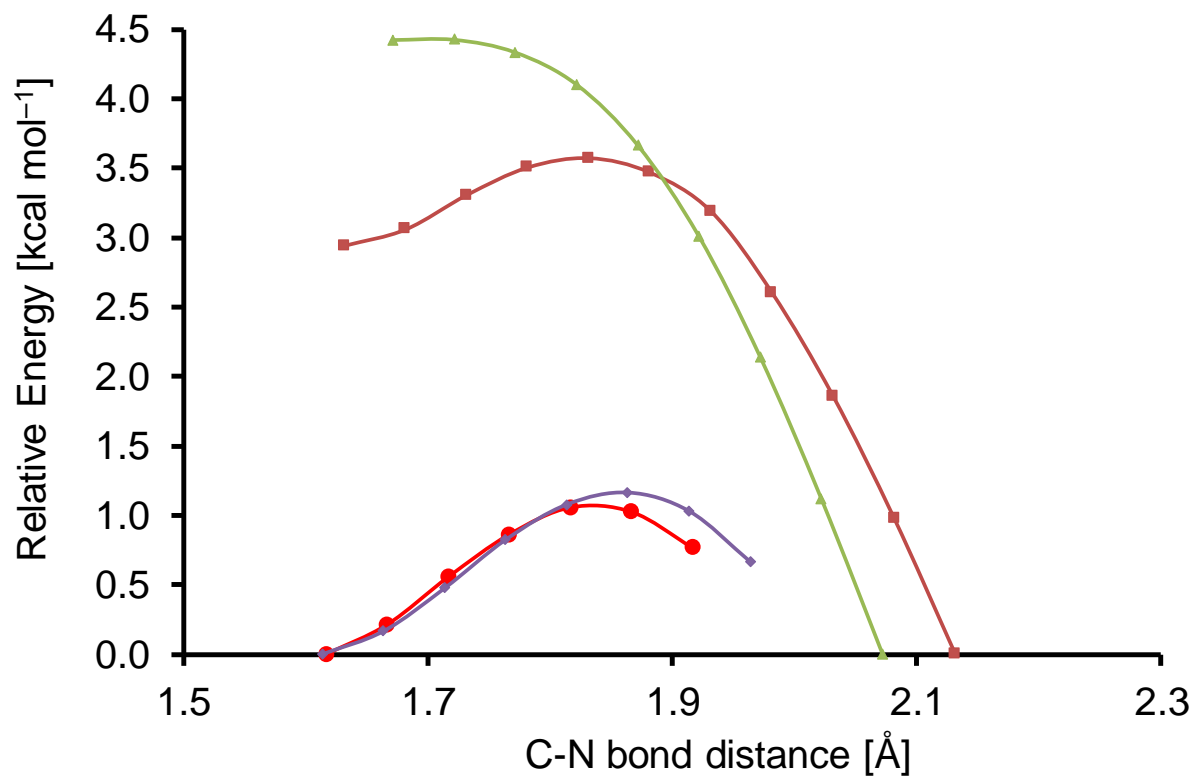

Figure S27: UB3LYP/BS1 geometry scan for NO<sub>2</sub> attack on a carbon position, -C<sup>4</sup> (in purple), -C<sup>5</sup> (in green), -C<sup>6</sup> (in red), -C<sup>7</sup> (in wine-red), of L-Trp substrate starting from <sup>4,2</sup>Int1<sub>B</sub> as obtained in Gaussian-09. All points refer to a full geometry optimization. Energies are relative to <sup>2</sup>Re.

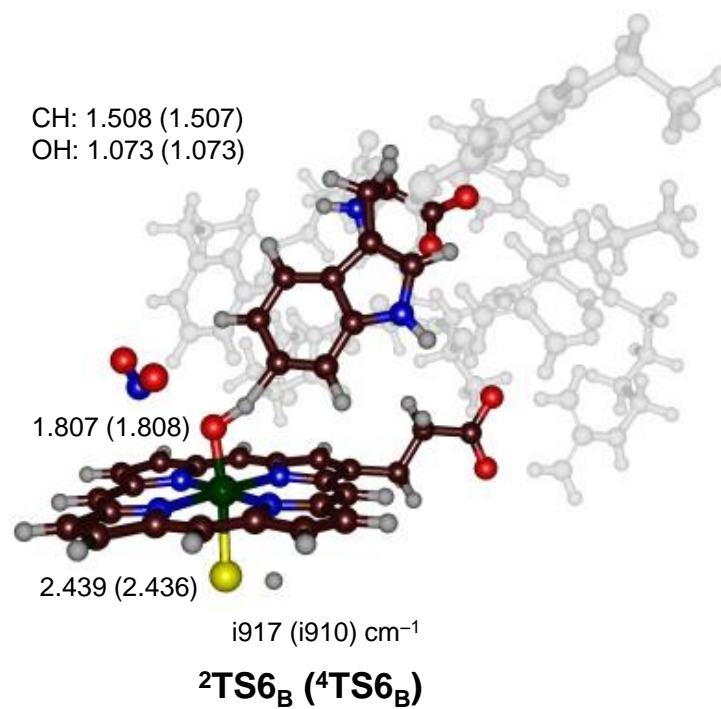

**Figure S28: UB3LYP/BS1 optimized geometries of transition states <sup>4,2</sup>TS<sub>6B</sub> for direct hydrogen atom abstraction from L-Trp from <sup>4,2</sup>Int1<sub>B</sub> as obtained in Gaussian-09.** Bond lengths are in angstroms and the imaginary frequency in wavenumbers.

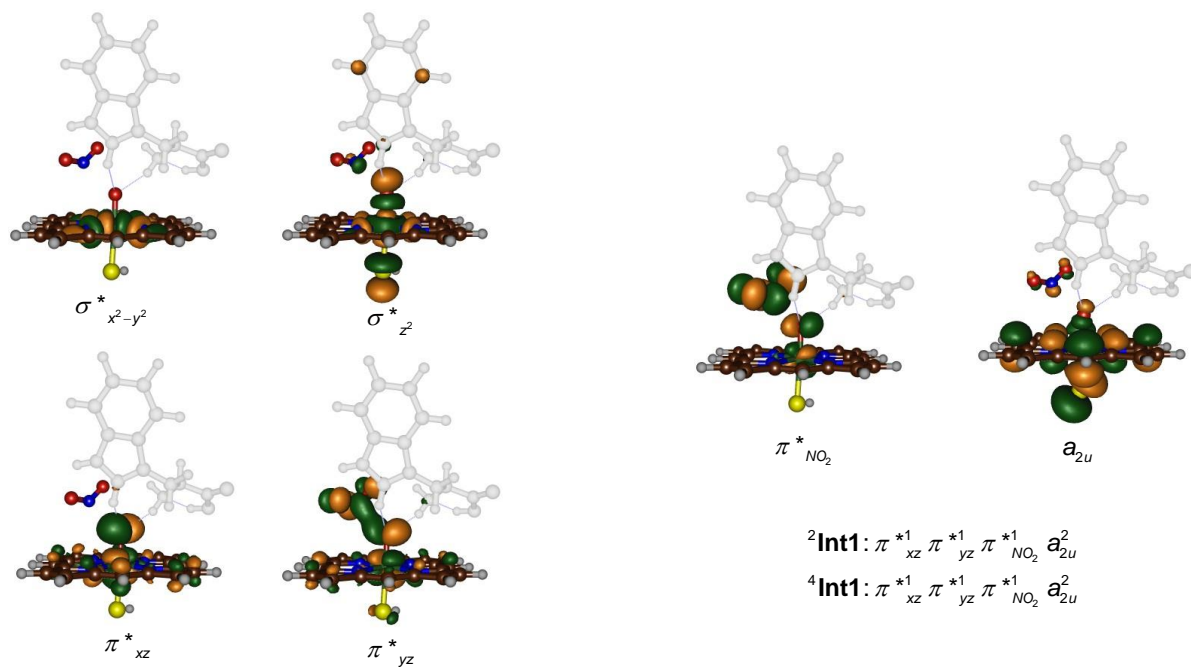

Figure S29: High-lying occupied and low-lying virtual orbitals of  ${}^4,2\text{Int1}_B$  as obtained in Gaussian-09.



**Table S24: Group spin densities and charges of local minima and transition states for Pathway2-C4 as calculated with B3LYP/BS1 with model B in Gaussian-09.**

**Spin density:**

| Species                                | $\rho_{\text{Fe}}$ | $\rho_{\text{Porp}}$ | $\rho_{\text{SH}}$ | $\rho_{\text{O}}$ | $\rho_{\text{OH}}$ | $\rho_{\text{NO2}}$ | $\rho_{\text{Subs}}$ | $\rho_{\text{Subs(NO}_2)}$ | $\rho_{\text{Lig1}}$ | $\rho_{\text{Arg}}$ | $\rho_{\text{PheGlu}}$ | $\rho_{\text{Tyr}}$ | $\rho_{\text{Total}}$ |
|----------------------------------------|--------------------|----------------------|--------------------|-------------------|--------------------|---------------------|----------------------|----------------------------|----------------------|---------------------|------------------------|---------------------|-----------------------|
| Pathway C4-endo:                       |                    |                      |                    |                   |                    |                     |                      |                            |                      |                     |                        |                     |                       |
| <sup>2</sup> TS4 <sub>B,C4-endo</sub>  | -0.01              | 0.00                 | -0.01              | 0.01              |                    | 0.00                | 1.00                 |                            | 0.00                 | 0.00                | 0.00                   | 0.00                | 1.00                  |
| <sup>2</sup> Int4 <sub>B,C4-endo</sub> | 0.00               | 0.00                 | -0.01              | 0.00              |                    |                     |                      | 0.99                       | 0.00                 | 0.00                | 0.01                   | 0.00                | 1.00                  |
| <sup>2</sup> Int4 <sub>B,C4-rot</sub>  | -0.01              | 0.01                 | 0.00               | 0.01              |                    |                     |                      | 0.99                       | 0.00                 | 0.00                | 0.00                   | 0.00                | 1.00                  |
| <sup>2</sup> TS5 <sub>B,C4-endo</sub>  | 1.00               | -0.06                | -0.01              |                   | 0.39               | 0.00                |                      | -0.32                      | 0.00                 | 0.00                | 0.00                   | 0.00                | 1.00                  |
| <sup>2</sup> Int5 <sub>B,C4-endo</sub> | 0.95               | -0.05                | -0.01              |                   | 0.12               | 0.00                |                      | -0.01                      | 0.00                 | 0.00                | 0.00                   | 0.00                | 1.00                  |
| <sup>4</sup> TS4 <sub>B,C4-endo</sub>  | 1.27               | -0.07                | -0.02              | 0.82              |                    | 0.00                | 1.00                 |                            | 0.00                 | 0.00                | 0.00                   | 0.00                | 3.00                  |
| <sup>4</sup> Int4 <sub>B,C4-endo</sub> | 1.27               | -0.07                | -0.02              | 0.82              |                    |                     |                      | 1.00                       | 0.00                 | 0.00                | 0.00                   | 0.00                | 3.00                  |
| <sup>4</sup> Int4 <sub>B,C4-rot</sub>  | 1.26               | -0.06                | -0.02              | 0.83              |                    |                     |                      | 0.99                       | 0.00                 | 0.00                | 0.00                   | 0.00                | 3.00                  |
| <sup>4</sup> TS5 <sub>B,C4-endo</sub>  | 2.22               | -0.09                | 0.06               |                   | 0.26               | 0.00                |                      | 0.55                       | 0.00                 | 0.00                | 0.00                   | 0.00                | 3.00                  |
| <sup>4</sup> Int5 <sub>B,C4-endo</sub> | 0.96               | 1.85                 | 0.07               |                   | 0.09               |                     |                      | 0.02                       | 0.00                 | 0.00                | 0.00                   | 0.00                | 3.00                  |
| Pathway C4-exo:                        |                    |                      |                    |                   |                    |                     |                      |                            |                      |                     |                        |                     |                       |
| <sup>2</sup> TS4 <sub>B,C4-exo</sub>   | -0.01              | 0.00                 | -0.01              | 0.01              |                    | 0.00                | 1.00                 |                            | 0.00                 | 0.00                | 0.00                   | 0.00                | 1.00                  |
| <sup>2</sup> Int4 <sub>B,C4-exo</sub>  | 1.27               | -0.07                | -0.02              | 0.82              |                    |                     |                      | -1.00                      | 0.00                 | 0.00                | 0.00                   | 0.00                | 1.00                  |
| <sup>2</sup> Int4 <sub>B,C4-rot</sub>  | -0.06              | 0.02                 | -0.03              | 0.07              |                    |                     |                      | 1.00                       | 0.00                 | 0.00                | 0.00                   | 0.00                | 1.00                  |
| <sup>2</sup> Int5 <sub>B,C4-exo</sub>  | 0.94               | -0.05                | -0.01              |                   | 0.12               |                     |                      | 0.00                       | 0.00                 | 0.00                | 0.00                   | 0.00                | 1.00                  |
| <sup>4</sup> TS4 <sub>B,C4-exo</sub>   | 1.27               | -0.07                | -0.02              | 0.82              |                    | 0.00                | 1.00                 |                            | 0.00                 | 0.00                | 0.00                   | 0.00                | 3.00                  |
| <sup>4</sup> Int4 <sub>B,C4-exo</sub>  | 1.27               | -0.07                | -0.02              | 0.82              |                    |                     |                      | 1.00                       | 0.00                 | 0.00                | 0.00                   | 0.00                | 3.00                  |
| <sup>4</sup> Int4 <sub>B,C4-rot</sub>  | 1.26               | -0.07                | -0.02              | 0.82              |                    |                     |                      | 1.00                       | 0.00                 | 0.00                | 0.00                   | 0.00                | 3.00                  |
| <sup>4</sup> Int5 <sub>B,C4-exo</sub>  | 0.89               | 1.68                 | 0.14               |                   | 0.13               |                     |                      | 0.16                       | 0.00                 | 0.00                | 0.00                   | 0.00                | 3.00                  |

Charge:

| Species                                | Fe   | Porp  | SH    | O     | OH    | NO2  | Subs | Subs(NO <sub>2</sub> ) | Lig1 | Arg  | PheGlu | Tyr   | Total |
|----------------------------------------|------|-------|-------|-------|-------|------|------|------------------------|------|------|--------|-------|-------|
| Pathway C4-endo:                       |      |       |       |       |       |      |      |                        |      |      |        |       |       |
| <sup>2</sup> TS4 <sub>B,C4-endo</sub>  | 0.40 | -1.03 | -0.44 | -0.49 |       | 0.00 | 0.06 |                        | 0.50 | 0.70 | -0.62  | -0.08 | -1.00 |
| <sup>2</sup> Int4 <sub>B,C4-endo</sub> | 0.42 | -1.04 | -0.46 | -0.49 |       |      |      | 0.08                   | 0.50 | 0.69 | -0.63  | -0.07 | -1.00 |
| <sup>2</sup> Int4 <sub>B,C4-rot</sub>  | 0.38 | -1.06 | -0.47 | -0.48 |       |      |      | 0.13                   | 0.52 | 0.71 | -0.62  | -0.10 | -1.00 |
| <sup>2</sup> TS5 <sub>B,C4-endo</sub>  | 0.35 | -1.16 | -0.38 |       | -0.51 |      |      | 0.21                   | 0.52 | 0.73 | -0.69  | -0.08 | -1.00 |
| <sup>2</sup> Int5 <sub>B,C4-endo</sub> | 0.34 | -1.16 | -0.39 |       | -0.63 |      |      | 0.36                   | 0.52 | 0.73 | -0.69  | -0.07 | -1.00 |
| <sup>4</sup> TS4 <sub>B,C4-endo</sub>  | 0.41 | -1.03 | -0.44 | -0.50 |       | 0.00 | 0.06 |                        | 0.50 | 0.70 | -0.62  | -0.08 | -1.00 |
| <sup>4</sup> Int4 <sub>B,C4-endo</sub> | 0.42 | -1.04 | -0.46 | -0.49 |       |      |      | 0.07                   | 0.50 | 0.70 | -0.63  | -0.07 | -1.00 |
| <sup>4</sup> Int4 <sub>B,C4-rot</sub>  | 0.39 | -1.06 | -0.47 | -0.49 |       |      |      | 0.13                   | 0.52 | 0.71 | -0.62  | -0.10 | -1.00 |
| <sup>4</sup> TS5 <sub>B,C4-endo</sub>  | 0.47 | -1.05 | -0.39 |       | -0.58 |      |      | 0.06                   | 0.52 | 0.73 | -0.68  | -0.08 | -1.00 |
| <sup>4</sup> Int5 <sub>B,C4-endo</sub> | 0.27 | -1.19 | -0.25 |       | -0.62 |      |      | 0.35                   | 0.51 | 0.74 | -0.71  | -0.09 | -1.00 |
| Pathway C4-exo:                        |      |       |       |       |       |      |      |                        |      |      |        |       |       |
| <sup>2</sup> TS4 <sub>B,C4-exo</sub>   | 0.40 | -1.03 | -0.44 | -0.49 |       | 0.00 | 0.06 |                        | 0.50 | 0.70 | -0.62  | -0.08 | -1.00 |
| <sup>2</sup> Int4 <sub>B,C4-exo</sub>  | 0.43 | -1.06 | -0.46 | -0.50 |       |      |      | 0.11                   | 0.50 | 0.69 | -0.64  | -0.07 | -1.00 |
| <sup>2</sup> Int4 <sub>B,C4-rot</sub>  | 0.40 | -1.06 | -0.46 | -0.49 |       |      |      | 0.10                   | 0.54 | 0.67 | -0.60  | -0.10 | -1.00 |
| <sup>2</sup> Int5 <sub>B,C4-exo</sub>  | 0.36 | -1.13 | -0.44 |       | -0.62 |      |      | 0.28                   | 0.48 | 0.73 | -0.58  | -0.09 | -1.00 |
| <sup>4</sup> TS4 <sub>B,C4-exo</sub>   | 0.41 | -1.03 | -0.44 | -0.50 |       | 0.00 | 0.06 |                        | 0.50 | 0.70 | -0.62  | -0.08 | -1.00 |
| <sup>4</sup> Int4 <sub>B,C4-exo</sub>  | 0.42 | -1.03 | -0.46 | -0.49 |       |      |      | 0.10                   | 0.49 | 0.69 | -0.65  | -0.07 | -1.00 |
| <sup>4</sup> Int4 <sub>B,C4-rot</sub>  | 0.41 | -1.06 | -0.46 | -0.49 |       |      |      | 0.10                   | 0.54 | 0.67 | -0.60  | -0.10 | -1.00 |
| <sup>4</sup> Int5 <sub>B,C4-exo</sub>  | 0.36 | -1.12 | -0.35 |       | -0.62 |      |      | 0.18                   | 0.49 | 0.73 | -0.58  | -0.09 | -1.00 |

**Table S25: Group spin densities and charges of local minima and transition states for Pathway2-C4 as calculated with B3LYP/BS2 with model B in Gaussian-09.**

**Spin density:**

| Species                                  | $\rho_{\text{Fe}}$ | $\rho_{\text{Porp}}$ | $\rho_{\text{SH}}$ | $\rho_{\text{O}}$ | $\rho_{\text{OH}}$ | $\rho_{\text{NO2}}$ | $\rho_{\text{Subs}}$ | $\rho_{\text{Subs(NO}_2)}$ | $\rho_{\text{Lig1}}$ | $\rho_{\text{Arg}}$ | $\rho_{\text{PheGlu}}$ | $\rho_{\text{Tyr}}$ | $\rho_{\text{Total}}$ |
|------------------------------------------|--------------------|----------------------|--------------------|-------------------|--------------------|---------------------|----------------------|----------------------------|----------------------|---------------------|------------------------|---------------------|-----------------------|
| Pathway C4-endo:                         |                    |                      |                    |                   |                    |                     |                      |                            |                      |                     |                        |                     |                       |
| <sup>2</sup> TS4 <sub>B,C4-endo</sub>    | 0.00               | 0.00                 | -0.01              | 0.02              |                    | 0.00                | 1.00                 |                            | 0.00                 | 0.00                | 0.00                   | 0.00                | 1.00                  |
| <sup>2</sup> Int4 <sub>B,C4-endo</sub>   | 0.00               | 0.00                 | -0.01              | 0.01              |                    |                     |                      | 0.99                       | 0.00                 | 0.00                | 0.00                   | 0.00                | 1.00                  |
| <sup>2</sup> Int4 <sub>B,C4-rotate</sub> | 0.00               | 0.00                 | 0.00               | -0.01             |                    |                     |                      | 1.00                       | 0.00                 | 0.00                | 0.00                   | 0.00                | 1.00                  |
| <sup>2</sup> TS5 <sub>B,C4-endo</sub>    | 1.56               | -0.30                | -0.06              |                   | 0.63               | 0.00                |                      | -0.83                      | 0.00                 | 0.00                | 0.00                   | 0.00                | 1.00                  |
| <sup>2</sup> Int5 <sub>B,C4-endo</sub>   | 1.20               | -0.25                | -0.02              |                   | 0.06               | 0.00                |                      | -0.01                      | 0.00                 | 0.00                | 0.00                   | 0.00                | 1.00                  |
| <sup>4</sup> TS4 <sub>B,C4-endo</sub>    | 1.42               | -0.22                | -0.03              | 0.83              |                    | 0.00                | 1.00                 |                            | 0.00                 | 0.00                | 0.00                   | 0.00                | 3.00                  |
| <sup>4</sup> Int4 <sub>B,C4-endo</sub>   | 1.42               | -0.21                | -0.03              | 0.83              |                    |                     |                      | 1.00                       | 0.00                 | 0.00                | 0.00                   | 0.00                | 3.00                  |
| <sup>4</sup> Int4 <sub>B,C4-rotate</sub> | 1.39               | -0.20                | -0.03              | 0.83              |                    |                     |                      | 1.00                       | 0.00                 | 0.00                | 0.00                   | 0.00                | 3.00                  |
| <sup>4</sup> TS5 <sub>B,C4-endo</sub>    | 2.25               | -0.38                | -0.07              |                   | 0.42               | 0.00                |                      | 0.78                       | 0.00                 | 0.00                | 0.00                   | 0.00                | 3.00                  |
| <sup>4</sup> Int5 <sub>B,C4-endo</sub>   | 1.04               | 1.76                 | 0.07               |                   | 0.09               |                     |                      | 0.03                       | 0.00                 | 0.00                | 0.00                   | 0.00                | 3.00                  |
| Pathway C4-exo:                          |                    |                      |                    |                   |                    |                     |                      |                            |                      |                     |                        |                     |                       |
| <sup>2</sup> TS4 <sub>B,C4-exo</sub>     | 1.39               | -0.20                | -0.03              | 0.83              |                    | 0.00                | -0.99                |                            | 0.00                 | 0.00                | 0.00                   | 0.00                | 1.00                  |
| <sup>2</sup> Int4 <sub>B,C4-exo</sub>    | 1.41               | -0.22                | -0.03              | 0.83              |                    |                     |                      | -0.99                      | 0.00                 | 0.00                | 0.00                   | 0.00                | 1.00                  |
| <sup>4</sup> Int4 <sub>B,C4-rotate</sub> | 0.00               | 0.00                 | 0.00               | 0.01              |                    |                     |                      | 1.00                       | 0.00                 | 0.00                | 0.00                   | 0.00                | 1.00                  |
| <sup>2</sup> Int5 <sub>B,C4-endo</sub>   | 1.20               | -0.25                | -0.02              |                   | 0.06               | 0.00                |                      | -0.01                      | 0.00                 | 0.00                | 0.00                   | 0.00                | 1.00                  |
| <sup>4</sup> TS4 <sub>B,C4-endo</sub>    | 1.42               | -0.22                | -0.03              | 0.83              |                    | 0.00                | 1.00                 |                            | 0.00                 | 0.00                | 0.00                   | 0.00                | 3.00                  |
| <sup>4</sup> Int4 <sub>B,C4-exo</sub>    | 1.42               | -0.22                | -0.03              | 0.83              |                    |                     |                      | 1.00                       | 0.00                 | 0.00                | 0.00                   | 0.00                | 3.00                  |
| <sup>4</sup> Int4 <sub>B,C4-rotate</sub> | 1.39               | -0.19                | -0.03              | 0.82              |                    |                     |                      | 1.00                       | 0.00                 | 0.00                | 0.00                   | 0.00                | 3.00                  |
| <sup>4</sup> Int5 <sub>B,C4-exo</sub>    | 1.07               | 1.81                 | 0.06               |                   | 0.07               |                     |                      | -0.01                      | 0.00                 | 0.00                | 0.00                   | 0.00                | 3.00                  |

Charge:

| Species                                  | Fe    | Porp | SH    | O     | OH   | NO2  | Subs  | Subs(NO <sub>2</sub> ) | Lig1 | Arg  | PheGlu | Tyr  | Total |
|------------------------------------------|-------|------|-------|-------|------|------|-------|------------------------|------|------|--------|------|-------|
| Pathway C4-endo:                         |       |      |       |       |      |      |       |                        |      |      |        |      |       |
| <sup>2</sup> TS4 <sub>B,C4-endo</sub>    | -2.95 | 1.46 | -0.45 | -0.04 |      | 0.00 | -0.25 |                        | 1.01 | 1.03 | -0.84  | 0.02 | -1.00 |
| <sup>2</sup> Int4 <sub>B,C4-endo</sub>   | -2.59 | 1.22 | -0.50 | -0.10 |      |      |       | -0.23                  | 0.94 | 1.02 | -0.81  | 0.04 | -1.00 |
| <sup>2</sup> Int4 <sub>B,C4-rotate</sub> | 0.00  | 0.00 | 0.00  | -0.01 |      |      |       | 1.00                   | 0.00 | 0.00 | 0.00   | 0.00 | 1.00  |
| <sup>2</sup> TS5 <sub>B,C4-endo</sub>    | -4.93 | 3.42 | -0.17 |       | 0.67 |      |       | -0.71                  | 1.00 | 0.96 | -1.32  | 0.08 | -1.00 |
| <sup>2</sup> Int5 <sub>B,C4-endo</sub>   | -4.15 | 2.46 | -0.17 |       | 0.35 |      |       | -0.15                  | 0.98 | 0.98 | -1.33  | 0.02 | -1.00 |
| <sup>4</sup> TS4 <sub>B,C4-endo</sub>    | -2.96 | 1.48 | -0.45 | -0.05 |      | 0.00 | -0.25 |                        | 1.01 | 1.03 | -0.84  | 0.02 | -1.00 |
| <sup>4</sup> Int4 <sub>B,C4-endo</sub>   | -2.60 | 1.24 | -0.50 | -0.10 |      |      |       | -0.23                  | 0.94 | 1.02 | -0.81  | 0.04 | -1.00 |
| <sup>4</sup> Int4 <sub>B,C4-rotate</sub> | -2.17 | 1.05 | -0.52 | -0.25 |      |      |       | -0.32                  | 0.96 | 1.06 | -0.84  | 0.03 | -1.00 |
| <sup>4</sup> TS5 <sub>B,C4-endo</sub>    | -4.55 | 3.19 | -0.29 |       | 0.65 |      |       | -0.72                  | 1.00 | 0.97 | -1.34  | 0.08 | -1.00 |
| <sup>4</sup> Int5 <sub>B,C4-endo</sub>   | -4.27 | 2.51 | -0.11 |       | 0.41 |      |       | -0.19                  | 0.98 | 0.98 | -1.34  | 0.02 | -1.00 |
| Pathway C4-exo:                          |       |      |       |       |      |      |       |                        |      |      |        |      |       |
| <sup>2</sup> TS4 <sub>B,C4-exo</sub>     | -1.80 | 0.68 | -0.55 | -0.28 |      | 0.00 | -0.22 |                        | 0.95 | 1.06 | -0.88  | 0.05 | -1.00 |
| <sup>2</sup> Int4 <sub>B,C4-exo</sub>    | -2.50 | 1.14 | -0.49 | -0.14 |      |      |       | -0.12                  | 0.97 | 1.02 | -0.92  | 0.05 | -1.00 |
| <sup>4</sup> Int4 <sub>B,C4-rotate</sub> | -1.59 | 0.57 | -0.58 | -0.32 |      |      |       | -0.31                  | 0.97 | 1.05 | -0.80  | 0.01 | -1.00 |
| <sup>2</sup> Int5 <sub>B,C4-exo</sub>    | -3.42 | 1.76 | -0.23 |       | 0.21 |      |       | 0.03                   | 0.90 | 1.01 | -1.32  | 0.06 | -1.00 |
| <sup>4</sup> TS4 <sub>B,C4-exo</sub>     | -1.80 | 0.68 | -0.55 | -0.28 |      | 0.00 | -0.22 |                        | 0.95 | 1.06 | -0.88  | 0.05 | -1.00 |
| <sup>4</sup> Int4 <sub>B,C4-exo</sub>    | -2.50 | 1.15 | -0.49 | -0.14 |      |      |       | -0.12                  | 0.97 | 1.02 | -0.92  | 0.05 | -1.00 |
| <sup>4</sup> Int4 <sub>B,C4-rotate</sub> | -1.60 | 0.59 | -0.58 | -0.33 |      |      |       | -0.31                  | 0.97 | 1.05 | -0.80  | 0.01 | -1.00 |
| <sup>4</sup> Int5 <sub>B,C4-exo</sub>    | -3.53 | 1.77 | -0.17 |       | 0.24 |      |       | 0.03                   | 0.91 | 1.01 | -1.33  | 0.07 | -1.00 |

## Part III: Cartesian coordinates.

### Cartesian coordinates of optimized geometries

#### Small model A results:

##### <sup>2</sup>Re<sub>A</sub>:

|    |              |              |              |
|----|--------------|--------------|--------------|
| 26 | 0.394425000  | 0.130821000  | 0.203226000  |
| 7  | 0.362866000  | -1.135833000 | -1.373441000 |
| 7  | -0.296076000 | 1.643572000  | -0.941584000 |
| 7  | 1.127074000  | -1.379214000 | 1.340969000  |
| 7  | 0.464854000  | 1.402287000  | 1.775644000  |
| 6  | 0.746683000  | -2.449377000 | -1.408179000 |
| 6  | -0.562825000 | 2.930696000  | -0.560388000 |
| 6  | -0.046222000 | -0.820522000 | -2.640222000 |
| 6  | -0.626741000 | 1.555919000  | -2.265887000 |
| 6  | 1.404843000  | -2.664241000 | 0.957310000  |
| 6  | 0.103959000  | 2.721302000  | 1.803125000  |
| 6  | 1.440019000  | -1.296846000 | 2.671187000  |
| 6  | 0.870093000  | 1.084741000  | 3.043013000  |
| 6  | 0.576722000  | -2.985334000 | -2.741160000 |
| 6  | -1.075953000 | 3.685595000  | -1.681605000 |
| 6  | 0.081785000  | -1.973572000 | -3.504961000 |
| 6  | -1.115689000 | 2.831806000  | -2.740819000 |
| 6  | 1.910477000  | -3.421531000 | 2.081088000  |
| 6  | 0.289158000  | 3.260658000  | 3.131566000  |
| 6  | 1.931262000  | -2.571911000 | 3.145165000  |
| 6  | 0.765800000  | 2.244196000  | 3.901928000  |
| 1  | 0.826813000  | -3.997562000 | -3.032699000 |
| 1  | -1.360491000 | 4.730212000  | -1.643914000 |
| 1  | -0.170583000 | -1.984248000 | -4.558412000 |
| 1  | -1.438074000 | 3.028788000  | -3.756130000 |
| 1  | 2.208822000  | -4.461876000 | 2.039414000  |
| 1  | 0.076184000  | 4.283679000  | 3.417716000  |
| 1  | 2.251670000  | -2.770377000 | 4.160768000  |
| 1  | 1.026631000  | 2.257940000  | 4.953452000  |
| 6  | 1.233265000  | -3.173792000 | -0.325703000 |
| 6  | -0.378533000 | 3.443817000  | 0.717880000  |
| 6  | 1.324663000  | -0.160233000 | 3.464266000  |
| 6  | -0.510582000 | 0.420467000  | -3.059312000 |
| 1  | 1.514399000  | -4.207597000 | -0.500529000 |
| 1  | -0.632657000 | 4.487254000  | 0.881697000  |
| 1  | 1.615481000  | -0.253834000 | 4.506986000  |
| 1  | -0.804254000 | 0.512610000  | -4.101234000 |
| 8  | 2.230433000  | 0.502193000  | -0.269175000 |
| 16 | -1.782623000 | -0.435035000 | 0.757867000  |
| 1  | -1.668187000 | -1.775856000 | 0.619375000  |
| 6  | 5.245934000  | -2.198420000 | -1.323948000 |
| 6  | 4.975873000  | -3.660735000 | -1.762234000 |
| 7  | 4.188085000  | -1.342138000 | -1.877138000 |
| 8  | 3.926723000  | -3.775591000 | -2.582611000 |
| 8  | 5.656814000  | -4.601969000 | -1.406543000 |
| 1  | 6.204198000  | -1.924869000 | -1.784153000 |
| 1  | 4.552251000  | -0.527293000 | -2.359982000 |
| 1  | 3.541781000  | -0.970316000 | -1.176966000 |
| 6  | 5.414251000  | -2.135237000 | 0.214194000  |
| 6  | 5.900948000  | -0.806749000 | 0.713895000  |
| 1  | 6.103011000  | -2.938420000 | 0.498244000  |
| 1  | 4.447514000  | -2.376251000 | 0.673870000  |
| 6  | 5.111609000  | 0.245939000  | 1.107889000  |
| 7  | 5.903870000  | 1.321129000  | 1.465631000  |
| 6  | 7.231169000  | 0.990864000  | 1.294518000  |
| 6  | 7.267404000  | -0.355074000 | 0.822592000  |
| 1  | 4.032200000  | 0.316348000  | 1.135380000  |
| 6  | 8.394623000  | 1.734633000  | 1.515881000  |
| 6  | 8.517713000  | -0.949209000 | 0.576567000  |
| 6  | 9.676895000  | -0.211688000 | 0.794716000  |
| 6  | 9.616211000  | 1.118357000  | 1.258640000  |
| 1  | 5.546397000  | 2.228151000  | 1.721395000  |
| 1  | 8.347625000  | 2.760320000  | 1.874833000  |
| 1  | 10.537923000 | 1.672465000  | 1.419305000  |
| 1  | 8.576529000  | -1.974601000 | 0.218796000  |
| 1  | 10.646717000 | -0.665403000 | 0.604798000  |
| 1  | 3.599129000  | -2.824784000 | -2.655395000 |

|   |             |             |              |
|---|-------------|-------------|--------------|
| 8 | 2.570138000 | 1.886164000 | -0.222224000 |
| 7 | 3.111083000 | 2.392800000 | -1.385990000 |
| 8 | 3.227863000 | 1.627738000 | -2.297525000 |

##### <sup>4</sup>Re<sub>A</sub>:

|    |              |              |              |
|----|--------------|--------------|--------------|
| 26 | 0.303950000  | 0.085358000  | 0.223202000  |
| 7  | 0.268609000  | -1.141056000 | -1.376542000 |
| 7  | -0.365221000 | 1.613272000  | -0.929388000 |
| 7  | 1.137687000  | -1.400067000 | 1.331623000  |
| 7  | 0.383552000  | 1.324955000  | 1.816337000  |
| 6  | 0.675523000  | -2.450583000 | -1.419854000 |
| 6  | -0.654702000 | 2.885715000  | -0.513914000 |
| 6  | -0.124749000 | -0.815187000 | -2.649399000 |
| 6  | -0.690289000 | 1.554665000  | -2.257672000 |
| 6  | 1.410547000  | -2.677680000 | 0.922913000  |
| 6  | -0.005516000 | 2.637676000  | 1.853986000  |
| 6  | 1.483165000  | -1.332860000 | 2.654890000  |
| 6  | 0.832033000  | 1.012974000  | 3.072793000  |
| 6  | 0.517109000  | -2.973060000 | -2.755402000 |
| 6  | -1.169778000 | 3.660672000  | -1.618969000 |
| 6  | 0.019033000  | -1.958549000 | -3.516989000 |
| 6  | -1.190536000 | 2.835187000  | -2.701525000 |
| 6  | 1.958418000  | -3.442695000 | 2.020376000  |
| 6  | 0.190383000  | 3.170202000  | 3.180237000  |
| 6  | 2.003389000  | -2.607115000 | 3.094903000  |
| 6  | 0.711570000  | 2.162292000  | 3.936279000  |
| 1  | 0.782775000  | -3.978818000 | -3.054998000 |
| 1  | -1.470278000 | 4.699418000  | -1.556210000 |
| 1  | -0.219568000 | -1.963011000 | -4.573492000 |
| 1  | -1.510936000 | 3.054784000  | -3.712613000 |
| 1  | 2.265116000  | -4.479200000 | 1.955860000  |
| 1  | -0.039854000 | 4.186273000  | 3.476812000  |
| 1  | 2.353114000  | -2.816983000 | 4.098252000  |
| 1  | 0.996556000  | 2.180604000  | 4.981197000  |
| 6  | 1.198250000  | -3.176952000 | -0.356059000 |
| 6  | -0.494779000 | 3.369602000  | 0.777375000  |
| 6  | 1.344666000  | -0.217284000 | 3.470647000  |
| 6  | -0.579823000 | 0.430365000  | -3.065474000 |
| 1  | 1.492690000  | -4.202753000 | -0.551396000 |
| 1  | -0.766385000 | 4.405059000  | 0.960642000  |
| 1  | 1.661637000  | -0.313269000 | 4.504993000  |
| 1  | -0.864089000 | 0.533701000  | -4.108454000 |
| 8  | 2.394387000  | 0.553925000  | -0.253784000 |
| 16 | -2.049095000 | -0.557017000 | 0.931086000  |
| 1  | -2.338023000 | -1.283919000 | -0.173460000 |
| 6  | 5.268891000  | -2.168460000 | -1.241682000 |
| 6  | 4.967947000  | -3.648108000 | -1.598493000 |
| 7  | 4.216847000  | -1.328226000 | -1.829695000 |
| 8  | 3.892757000  | -3.782955000 | -2.380747000 |
| 8  | 5.645195000  | -4.581743000 | -1.215556000 |
| 1  | 6.231175000  | -1.939356000 | -1.717870000 |
| 1  | 4.584544000  | -0.598032000 | -2.430663000 |
| 1  | 3.619373000  | -0.839398000 | -1.152483000 |
| 6  | 5.448305000  | -2.027695000 | 0.289651000  |
| 6  | 5.997914000  | -0.698268000 | 0.718469000  |
| 1  | 6.104282000  | -2.843148000 | 0.613361000  |
| 1  | 4.475238000  | -2.202875000 | 0.765431000  |
| 6  | 5.259621000  | 0.422429000  | 1.011410000  |
| 7  | 6.104158000  | 1.469736000  | 1.331723000  |
| 6  | 7.414259000  | 1.051441000  | 1.236953000  |
| 6  | 7.384783000  | -0.322588000 | 0.852952000  |
| 1  | 4.183687000  | 0.551396000  | 0.981212000  |
| 6  | 8.611920000  | 1.738730000  | 1.457787000  |
| 6  | 8.604952000  | -1.003079000 | 0.694808000  |
| 6  | 9.798322000  | -0.321794000 | 0.912324000  |
| 6  | 9.802507000  | 1.036852000  | 1.288992000  |
| 1  | 5.795483000  | 2.410178000  | 1.521157000  |
| 1  | 8.614314000  | 2.786651000  | 1.749651000  |
| 1  | 10.749933000 | 1.545311000  | 1.451280000  |
| 1  | 8.614447000  | -2.050861000 | 0.403404000  |
| 1  | 10.744916000 | -0.842880000 | 0.789719000  |
| 1  | 3.584621000  | -2.823420000 | -2.481997000 |
| 8  | 2.652927000  | 1.935573000  | -0.415277000 |
| 7  | 3.040110000  | 2.333910000  | -1.676191000 |
| 8  | 3.117405000  | 1.467960000  | -2.503724000 |

| <sup>2</sup> TS1A: |              |              |              |
|--------------------|--------------|--------------|--------------|
| 26                 | 0.467863000  | 0.125661000  | 0.208803000  |
| 7                  | 0.369533000  | -1.175500000 | -1.351445000 |
| 7                  | -0.257148000 | 1.607253000  | -0.939389000 |
| 7                  | 1.116929000  | -1.405090000 | 1.387330000  |
| 7                  | 0.483024000  | 1.384251000  | 1.784598000  |
| 6                  | 0.742649000  | -2.492105000 | -1.365203000 |
| 6                  | -0.523548000 | 2.897275000  | -0.567538000 |
| 6                  | -0.023726000 | -0.870224000 | -2.623518000 |
| 6                  | -0.581225000 | 1.511361000  | -2.266040000 |
| 6                  | 1.387434000  | -2.692201000 | 1.008804000  |
| 6                  | 0.125681000  | 2.703775000  | 1.799926000  |
| 6                  | 1.429602000  | -1.314870000 | 2.714945000  |
| 6                  | 0.876781000  | 1.072649000  | 3.057924000  |
| 6                  | 0.577741000  | -3.041822000 | -2.693767000 |
| 6                  | -1.028633000 | 3.645256000  | -1.696336000 |
| 6                  | 0.099301000  | -2.034836000 | -3.473796000 |
| 6                  | -1.063915000 | 2.785415000  | -2.750410000 |
| 6                  | 1.883845000  | -3.446650000 | 2.123942000  |
| 6                  | 0.300561000  | 3.250577000  | 3.126320000  |
| 6                  | 1.908809000  | -2.591326000 | 3.198412000  |
| 6                  | 0.767878000  | 2.238269000  | 3.907206000  |
| 1                  | 0.822302000  | -4.059053000 | -2.971603000 |
| 1                  | -1.312819000 | 4.690127000  | -1.665699000 |
| 1                  | -0.144957000 | -2.055693000 | -4.528896000 |
| 1                  | -1.381931000 | 2.975687000  | -3.768272000 |
| 1                  | 2.173251000  | -4.489720000 | 2.104774000  |
| 1                  | 0.086473000  | 4.275714000  | 3.403617000  |
| 1                  | 2.223973000  | -2.786152000 | 4.216262000  |
| 1                  | 1.018421000  | 2.257430000  | 4.961031000  |
| 6                  | 1.215950000  | -3.208501000 | -0.271666000 |
| 6                  | -0.346435000 | 3.420023000  | 0.706935000  |
| 6                  | 1.319614000  | -0.169771000 | 3.495595000  |
| 6                  | -0.471642000 | 0.372448000  | -3.053867000 |
| 1                  | 1.485131000  | -4.247600000 | -0.434484000 |
| 1                  | -0.599262000 | 4.465046000  | 0.861202000  |
| 1                  | 1.603466000  | -0.253772000 | 4.540903000  |
| 1                  | -0.759330000 | 0.462520000  | -4.097476000 |
| 8                  | 2.116058000  | 0.384570000  | -0.181351000 |
| 16                 | -1.773654000 | -0.463665000 | 0.770882000  |
| 1                  | -1.643557000 | -1.807557000 | 0.695731000  |
| 6                  | 5.177580000  | -2.147829000 | -1.387559000 |
| 6                  | 4.912333000  | -3.597754000 | -1.864685000 |
| 7                  | 4.108731000  | -1.286084000 | -1.907984000 |
| 8                  | 3.929907000  | -3.678420000 | -2.769522000 |
| 8                  | 5.546279000  | -4.559666000 | -1.479740000 |
| 1                  | 6.117838000  | -1.851376000 | -1.871736000 |
| 1                  | 4.447007000  | -0.380805000 | -2.220289000 |
| 1                  | 3.392548000  | -1.066196000 | -1.211521000 |
| 6                  | 5.393570000  | -2.114668000 | 0.144930000  |
| 6                  | 5.878546000  | -0.787764000 | 0.652521000  |
| 1                  | 6.100832000  | -2.913024000 | 0.394231000  |
| 1                  | 4.444690000  | -2.378066000 | 0.629114000  |
| 6                  | 5.086649000  | 0.277247000  | 1.007696000  |
| 7                  | 5.877847000  | 1.348400000  | 1.379894000  |
| 6                  | 7.206597000  | 1.002759000  | 1.260528000  |
| 6                  | 7.245018000  | -0.348712000 | 0.803853000  |
| 1                  | 4.006971000  | 0.360137000  | 0.998453000  |
| 6                  | 8.369191000  | 1.737114000  | 1.515280000  |
| 6                  | 8.497328000  | -0.957040000 | 0.607459000  |
| 6                  | 9.655705000  | -0.229028000 | 0.859041000  |
| 6                  | 9.592717000  | -1.106245000 | 1.307555000  |
| 1                  | 5.520093000  | 2.258509000  | 1.624186000  |
| 1                  | 8.320023000  | 2.766932000  | 1.862013000  |
| 1                  | 10.513922000 | 1.652690000  | 1.495267000  |
| 1                  | 8.558289000  | -1.986363000 | 0.261587000  |
| 1                  | 10.626854000 | -0.694342000 | 0.707646000  |
| 1                  | 3.611944000  | -2.726065000 | -2.839060000 |
| 8                  | 2.708660000  | 2.217490000  | -0.262816000 |
| 7                  | 3.312815000  | 2.551641000  | -1.306527000 |
| 8                  | 3.530397000  | 1.800775000  | -2.235030000 |

| <sup>4</sup> TS1A: |              |              |              |
|--------------------|--------------|--------------|--------------|
| 26                 | 0.471301000  | 0.054822000  | 0.207516000  |
| 7                  | 0.309609000  | -1.167564000 | -1.375048000 |
| 7                  | -0.294321000 | 1.598056000  | -0.912639000 |
| 7                  | 1.185549000  | -1.450756000 | 1.317136000  |
| 7                  | 0.485250000  | 1.275091000  | 1.844896000  |
| 6                  | 0.657642000  | -2.491572000 | -1.426276000 |
| 6                  | -0.546881000 | 2.869734000  | -0.483519000 |
| 6                  | -0.086010000 | -0.818666000 | -2.644139000 |
| 6                  | -0.605036000 | 1.563235000  | -2.239246000 |
| 6                  | 1.404681000  | -2.741869000 | 0.907596000  |
| 6                  | 0.117367000  | 2.592768000  | 1.883959000  |
| 6                  | 1.541283000  | -1.396118000 | 2.643173000  |
| 6                  | 0.941090000  | 0.957692000  | 3.090903000  |
| 6                  | 0.462883000  | -3.003226000 | -2.761895000 |
| 6                  | -1.039992000 | 3.673008000  | -1.582427000 |
| 6                  | 0.002605000  | -1.965869000 | -3.515460000 |
| 6                  | -1.074798000 | 2.861417000  | -2.674393000 |
| 6                  | 1.932442000  | -3.523111000 | 2.002046000  |
| 6                  | 0.332343000  | 3.122652000  | 3.211597000  |
| 6                  | 2.018586000  | -2.688841000 | 3.074977000  |
| 6                  | 0.845565000  | 2.107513000  | 3.961422000  |
| 1                  | 0.676605000  | -4.020036000 | -3.066006000 |
| 1                  | -1.315250000 | 4.718072000  | -1.508287000 |
| 1                  | -0.249129000 | -1.957583000 | -4.568939000 |
| 1                  | -1.384541000 | 3.099827000  | -3.684656000 |
| 1                  | 2.196980000  | -4.571123000 | 1.937062000  |
| 1                  | 0.118131000  | 4.141501000  | 3.510910000  |
| 1                  | 2.366517000  | -2.912027000 | 4.076089000  |
| 1                  | 1.139151000  | 2.119135000  | 5.004117000  |
| 6                  | 1.159397000  | -3.237470000 | -0.365659000 |
| 6                  | -0.364079000 | 3.336897000  | 0.812536000  |
| 6                  | 1.437231000  | -0.286934000 | 3.470443000  |
| 6                  | -0.510388000 | 0.438783000  | -3.052850000 |
| 1                  | 1.409175000  | -4.275441000 | -0.558716000 |
| 1                  | -0.610726000 | 4.377402000  | 1.004268000  |
| 1                  | 1.763150000  | -4.402574000 | 4.500023000  |
| 1                  | -0.790442000 | 0.551530000  | -4.096221000 |
| 8                  | 2.161075000  | 0.568249000  | -0.247273000 |
| 16                 | -1.930528000 | -0.399501000 | 0.881246000  |
| 1                  | -2.350655000 | -0.808152000 | -0.338691000 |
| 6                  | 5.185878000  | -2.224846000 | -1.208497000 |
| 6                  | 4.930266000  | -3.711514000 | -1.568721000 |
| 7                  | 4.081797000  | -1.421256000 | -1.749457000 |
| 8                  | 3.866188000  | -3.877915000 | -2.361289000 |
| 8                  | 5.632134000  | -4.626168000 | -1.185092000 |
| 1                  | 6.111901000  | -1.950735000 | -1.730693000 |
| 1                  | 4.393174000  | -0.609974000 | -2.274213000 |
| 1                  | 3.445975000  | -1.043771000 | -1.041656000 |
| 6                  | 5.435484000  | -2.085937000 | 0.313760000  |
| 6                  | 5.914541000  | -0.723333000 | 0.722918000  |
| 1                  | 6.158883000  | -2.858336000 | 0.595847000  |
| 1                  | 4.501828000  | -2.329839000 | 0.836542000  |
| 6                  | 5.115632000  | 0.363445000  | 0.982793000  |
| 7                  | 5.898449000  | 1.463990000  | 1.276589000  |
| 6                  | 7.229700000  | 1.116952000  | 1.193310000  |
| 6                  | 7.278125000  | -0.267901000 | 0.850853000  |
| 1                  | 4.036229000  | 0.446110000  | 0.948414000  |
| 6                  | 8.386512000  | 1.876125000  | 1.395756000  |
| 6                  | 8.535041000  | -0.883807000 | 0.718445000  |
| 6                  | 9.687801000  | -0.131073000 | 0.918594000  |
| 6                  | 9.614950000  | 1.236919000  | 1.252155000  |
| 1                  | 5.533193000  | 2.395557000  | 1.399123000  |
| 1                  | 8.329073000  | 2.930932000  | 1.655154000  |
| 1                  | 10.531948000 | 1.802108000  | 1.401062000  |
| 1                  | 8.604387000  | -1.938040000 | 0.460350000  |
| 1                  | 10.662336000 | -0.602595000 | 0.815580000  |
| 1                  | 3.522809000  | -2.932677000 | -2.460100000 |
| 8                  | 2.959145000  | 2.141562000  | -0.553330000 |
| 7                  | 3.423157000  | 2.345798000  | -1.720860000 |
| 8                  | 3.392006000  | 1.487198000  | -2.578195000 |

|               |              |              |              |             |              |              |               |
|---------------|--------------|--------------|--------------|-------------|--------------|--------------|---------------|
| <b>Int1A:</b> |              |              | 7            | 0.202757000 | -1.215381000 | -1.480273000 |               |
| 26            | 0.507756000  | 0.038586000  | 0.187520000  | 7           | -0.110154000 | 1.573042000  | -0.919797000  |
| 7             | 0.308960000  | -1.215840000 | -1.389825000 | 7           | 1.023951000  | -1.676346000 | 1.223675000   |
| 7             | -0.145879000 | 1.577406000  | -0.948768000 | 7           | 0.635927000  | 1.094481000  | 1.808495000   |
| 7             | 1.053883000  | -1.535464000 | 1.352344000  | 6           | 0.437046000  | -2.560738000 | -1.570248000  |
| 7             | 0.521009000  | 1.247282000  | 1.806729000  | 6           | -0.230847000 | 2.852422000  | -0.455989000  |
| 6             | 0.632719000  | -2.546113000 | -1.424267000 | 6           | -0.168081000 | -0.800391000 | -2.731102000  |
| 6             | -0.339265000 | 2.870112000  | -0.546004000 | 6           | -0.447519000 | 1.604247000  | -2.243531000  |
| 6             | -0.051967000 | -0.870545000 | -2.663266000 | 6           | 1.143032000  | -2.958301000 | 0.761399000   |
| 6             | -0.464306000 | 1.531969000  | -2.277782000 | 6           | 0.413906000  | 2.441809000  | 1.892146000   |
| 6             | 1.270635000  | -2.821822000 | 0.943593000  | 6           | 1.377428000  | -1.705109000 | 2.544246000   |
| 6             | 0.245376000  | 2.586060000  | 1.832591000  | 6           | 1.034767000  | 0.686177000  | 3.051381000   |
| 6             | 1.347339000  | -1.495172000 | 2.685879000  | 6           | 0.190136000  | -3.017259000 | -2.919219000  |
| 6             | 0.880991000  | 0.897330000  | 3.079943000  | 6           | -0.657667000 | 3.728989000  | -1.525422000  |
| 6             | 0.456111000  | -3.064037000 | -2.762095000 | 6           | -0.186950000 | -1.924690000 | -3.639054000  |
| 6             | -0.787903000 | 3.674473000  | -1.661300000 | 6           | -0.792240000 | 2.954136000  | -2.635693000  |
| 6             | 0.027063000  | -2.024508000 | -3.529800000 | 6           | 1.597685000  | -3.829374000 | 1.823985000   |
| 6             | -0.866543000 | 2.843863000  | -2.735888000 | 6           | 0.672258000  | 2.901392000  | 3.238012000   |
| 6             | 1.721553000  | -3.627390000 | 2.058970000  | 6           | 1.741452000  | -3.051438000 | 2.930833000   |
| 6             | 0.429770000  | 3.102881000  | 3.169347000  | 6           | 1.057887000  | 1.811925000  | 3.256727000   |
| 6             | 1.766189000  | -2.803654000 | 3.140949000  | 1           | 0.304296000  | -4.041571000 | -3.9251888000 |
| 6             | 0.823762000  | 2.054734000  | 3.943680000  | 1           | -0.827312000 | 4.793587000  | -1.418496000  |
| 1             | 0.655819000  | -4.087083000 | -3.054678000 | 1           | -0.449703000 | -1.864351000 | -4.688283000  |
| 1             | -1.011779000 | 4.732950000  | -1.606190000 | 1           | -1.096349000 | 3.247609000  | -3.633226000  |
| 1             | -0.207691000 | -2.017355000 | -4.587272000 | 1           | 1.783121000  | -4.890283000 | 1.712398000   |
| 1             | -1.167553000 | 3.075896000  | -3.750316000 | 1           | 0.568662000  | 3.927762000  | 3.568668000   |
| 1             | 1.966978000  | -4.680389000 | 1.997884000  | 1           | 2.064443000  | -3.341409000 | 3.923196000   |
| 1             | 0.273620000  | 4.135469000  | 3.457189000  | 1           | 1.337510000  | 1.755570000  | 5.002629000   |
| 1             | 2.055355000  | -3.038708000 | 4.157996000  | 6           | 0.871041000  | -3.379942000 | -3.379942000  |
| 1             | 1.059540000  | 2.045625000  | 5.000924000  | 6           | 0.011138000  | 3.265377000  | 0.847691000   |
| 6             | 1.081215000  | -3.301677000 | -0.346696000 | 6           | 1.382544000  | -0.613195000 | 3.402903000   |
| 6             | -0.155044000 | 3.350790000  | 0.743217000  | 6           | -0.477283000 | 0.505832000  | -3.093680000  |
| 6             | 1.265657000  | -0.370886000 | 3.497577000  | 1           | 1.035360000  | -4.428072000 | -0.761869000  |
| 6             | -0.422742000 | 0.401521000  | -3.082830000 | 1           | -0.123432000 | 4.320073000  | 1.069851000   |
| 1             | 1.315112000  | -4.344780000 | -0.534005000 | 1           | 1.685071000  | -0.788052000 | 4.431324000   |
| 1             | -0.343591000 | 4.406372000  | 0.915793000  | 1           | -0.762415000 | 0.681361000  | -4.127152000  |
| 1             | 1.529185000  | -0.491303000 | 4.544412000  | 8           | 2.092727000  | 0.232110000  | -0.276687000  |
| 1             | -0.695322000 | 0.521997000  | -4.127374000 | 16          | -1.823745000 | -0.361090000 | 0.796518000   |
| 8             | 2.107225000  | 0.323662000  | -0.168140000 | 1           | -2.269786000 | -0.935625000 | -0.344435000  |
| 16            | -1.809157000 | -0.417872000 | 0.814419000  | 6           | 5.167058000  | -2.313363000 | -0.818986000  |
| 1             | -2.017740000 | -1.485498000 | 0.010317000  | 6           | 4.878437000  | -3.829043000 | -0.941520000  |
| 6             | 5.142204000  | -2.216263000 | -1.174318000 | 7           | 4.135895000  | -1.580142000 | -1.567757000  |
| 6             | 4.839035000  | -3.693057000 | -1.525207000 | 8           | 3.932272000  | -4.109225000 | -1.846959000  |
| 7             | 4.094859000  | -1.371797000 | -1.765884000 | 8           | 5.470786000  | -4.680628000 | -0.310708000  |
| 8             | 3.862192000  | -3.826128000 | -2.431197000 | 1           | 6.126090000  | -2.162353000 | -1.333212000  |
| 8             | 5.443271000  | -4.634738000 | -1.053473000 | 1           | 4.522422000  | -0.772277000 | -2.047904000  |
| 1             | 6.086787000  | -1.986774000 | -1.685890000 | 1           | 3.395960000  | -1.200904000 | -0.965279000  |
| 1             | 4.468279000  | -0.498584000 | -2.126805000 | 6           | 5.350094000  | -1.901771000 | 0.662306000   |
| 1             | 3.375619000  | -1.091486000 | -1.091279000 | 6           | 5.832141000  | -0.488025000 | 0.813650000   |
| 6             | 5.370551000  | -2.050482000 | 0.348692000  | 1           | 6.046216000  | -2.612712000 | 1.120219000   |
| 6             | 5.857397000  | -0.679613000 | 0.719677000  | 1           | 4.389163000  | -2.030541000 | 1.175938000   |
| 1             | 6.079530000  | -2.824290000 | 0.662186000  | 6           | 5.033268000  | 0.627981000  | 0.866330000   |
| 1             | 4.425827000  | -2.267331000 | 0.862934000  | 7           | 5.812139000  | 1.767922000  | 0.930645000   |
| 6             | 5.061151000  | 0.409390000  | 0.977965000  | 6           | 7.143108000  | 1.413151000  | 0.888713000   |
| 7             | 5.843535000  | 1.524803000  | 1.211499000  | 6           | 7.194918000  | -0.012521000 | 0.827392000   |
| 6             | 7.172884000  | 1.185038000  | 1.080471000  | 1           | 3.952641000  | 0.693565000  | 0.839602000   |
| 6             | 7.220837000  | -0.209981000 | 0.780773000  | 6           | 8.299022000  | 2.200143000  | 0.910596000   |
| 1             | 3.979935000  | 0.475913000  | 0.988259000  | 6           | 8.453212000  | -0.639189000 | 0.796169000   |
| 6             | 8.330188000  | 1.959853000  | 1.207899000  | 6           | 9.604477000  | 0.141613000  | 0.816994000   |
| 6             | 8.476954000  | -0.820190000 | 0.617434000  | 6           | 9.528694000  | 1.548496000  | 0.871144000   |
| 6             | 9.629743000  | -0.051706000 | 0.743479000  | 1           | 5.436109000  | 2.698301000  | 0.822668000   |
| 6             | 9.557467000  | 1.326339000  | 1.033229000  | 1           | 8.239304000  | 3.285253000  | 0.955558000   |
| 1             | 5.470397000  | 2.459850000  | 1.277648000  | 1           | 10.444604000 | 2.134569000  | 0.884439000   |
| 1             | 8.273430000  | 3.022035000  | 1.434969000  | 1           | 8.525403000  | -1.723702000 | 0.754653000   |
| 1             | 10.474464000 | 1.903705000  | 1.124104000  | 1           | 10.580062000 | -0.338232000 | 0.790693000   |
| 1             | 8.545761000  | -1.882329000 | 0.393678000  | 1           | 3.641022000  | -3.197607000 | -2.153733000  |
| 1             | 10.603694000 | -0.518505000 | 0.616224000  | 8           | 3.356060000  | 3.136159000  | -0.473141000  |
| 1             | 3.567470000  | -2.877879000 | -2.584876000 | 7           | 3.129178000  | 2.375783000  | -1.390746000  |
| 8             | 3.346046000  | 3.051326000  | -0.150256000 | 8           | 3.884089000  | 1.886648000  | -2.198264000  |
| 7             | 3.084702000  | 2.295434000  | -1.060270000 |             |              |              |               |
| 8             | 3.751480000  | 1.974647000  | -2.016799000 |             |              |              |               |

**Int1A:**  
26 0.507528000 -0.046551000 0.142960000

**²TS2A:**

|    |              |               |              |
|----|--------------|---------------|--------------|
| 26 | 1.271543000  | 0.291322000   | 0.165237000  |
| 7  | 2.360446000  | -0.171933000  | -1.492273000 |
| 7  | 1.118181000  | 2.211507000   | -0.440064000 |
| 7  | 1.346099000  | -1.662538000  | 0.717855000  |
| 7  | 0.117004000  | 0.734565000   | 1.754740000  |
| 6  | 2.881673000  | -1.389599000  | -1.826857000 |
| 6  | 0.433533000  | 3.232119000   | 0.169030000  |
| 6  | 2.759069000  | 0.703478000   | -2.460284000 |
| 6  | 1.678821000  | 2.748873000   | -1.571446000 |
| 6  | 1.995609000  | -2.683969000  | 0.082990000  |
| 6  | -0.431797000 | 1.945897000   | 2.084735000  |
| 6  | 0.786977000  | -2.196296000  | 1.841251000  |
| 6  | -0.276799000 | -0.143052000  | 2.731046000  |
| 6  | 3.642016000  | -1.284883000  | -3.052750000 |
| 6  | 0.575562000  | 4.453095000   | -0.591858000 |
| 6  | 3.566110000  | 0.019267000   | -3.449278000 |
| 6  | 1.350245000  | 4.154368000   | -1.670449000 |
| 6  | 1.837098000  | -3.914563000  | 0.829827000  |
| 6  | -1.190497000 | 1.838283000   | 3.311914000  |
| 6  | 1.086749000  | -3.6111379000 | 1.923389000  |
| 6  | -1.091523000 | 0.541878000   | 3.712791000  |
| 1  | 4.145414000  | -2.110358000  | -3.542002000 |
| 1  | 0.132102000  | 5.402369000   | -0.318181000 |
| 1  | 3.991675000  | 0.483966000   | 0.4331037000 |
| 1  | 1.677908000  | 4.807757000   | -2.469699000 |
| 1  | 2.251133000  | -4.872262000  | 0.537874000  |
| 1  | -1.711647000 | 2.666768000   | 3.773709000  |
| 1  | 0.754986000  | -4.267885000  | 2.718808000  |
| 1  | -1.527273000 | 0.070762000   | 4.585798000  |
| 6  | 2.710270000  | -2.566395000  | -1.102953000 |
| 6  | -0.291663000 | 3.120155000   | 1.352138000  |
| 6  | 0.037014000  | -1.495569000  | 2.781549000  |
| 6  | 2.447908000  | 2.060946000   | -2.503290000 |
| 1  | 3.177384000  | -3.465521000  | -1.495744000 |
| 1  | -0.786030000 | 4.005775000   | 1.738867000  |
| 1  | -0.351692000 | -2.060471000  | 3.624629000  |
| 1  | 2.833326000  | 2.632742000   | -3.343154000 |
| 8  | 2.784165000  | 0.461765000   | 1.038322000  |
| 16 | -0.718313000 | -0.296552000  | -1.080976000 |
| 1  | -1.384049000 | 0.871166000   | -0.923987000 |
| 6  | 6.233467000  | 2.310859000   | -1.809975000 |
| 6  | 6.570803000  | 3.012275000   | -3.139183000 |
| 7  | 6.632266000  | 0.895776000   | -1.907557000 |
| 8  | 7.376905000  | 2.284834000   | -3.930462000 |
| 8  | 6.180646000  | 4.122881000   | -3.426198000 |
| 1  | 5.157508000  | 2.425009000   | -1.643997000 |
| 1  | 5.830417000  | 0.331621000   | -2.193737000 |
| 1  | 6.916797000  | 0.556336000   | -0.989359000 |
| 6  | 6.993862000  | 3.042522000   | -0.670432000 |
| 6  | 6.836228000  | 2.387587000   | 0.670457000  |
| 1  | 6.630763000  | 4.076923000   | -0.662990000 |
| 1  | 8.060704000  | 3.083621000   | -0.928904000 |
| 6  | 7.844311000  | 1.825656000   | 1.414958000  |
| 7  | 7.322097000  | 1.280835000   | 2.579133000  |
| 6  | 5.956533000  | 1.453671000   | 2.592561000  |
| 6  | 5.606891000  | 2.160870000   | 1.407535000  |
| 1  | 8.906533000  | 1.780708000   | 1.214209000  |
| 6  | 5.000803000  | 1.055864000   | 3.551145000  |
| 6  | 4.266958000  | 2.478442000   | 1.178651000  |
| 6  | 3.268188000  | 1.941985000   | 2.043300000  |
| 6  | 3.680241000  | 1.327204000   | 3.284081000  |
| 1  | 7.850479000  | 0.775085000   | 3.272210000  |
| 1  | 5.302742000  | 0.551855000   | 4.466424000  |
| 1  | 2.907134000  | 1.022426000   | 3.982290000  |
| 1  | 3.955015000  | 3.044543000   | 0.307971000  |
| 1  | 2.284457000  | 2.391328000   | 2.020145000  |
| 1  | 7.488535000  | 1.434355000   | -3.417528000 |
| 8  | -2.057763000 | 5.256861000   | 3.595967000  |
| 7  | -1.061578000 | 5.699812000   | 4.173471000  |
| 8  | -1.053822000 | 6.678810000   | 4.910022000  |

**²Int2A:**

|    |              |              |              |
|----|--------------|--------------|--------------|
| 26 | 1.198154000  | 0.278450000  | 0.131124000  |
| 7  | 2.332324000  | -0.169361000 | -1.495155000 |
| 7  | 1.103253000  | 2.224417000  | -0.431390000 |
| 7  | 1.290476000  | -1.666863000 | 0.685204000  |
| 7  | 0.098001000  | 0.739067000  | 1.755502000  |
| 6  | 2.867534000  | -1.382066000 | -1.826957000 |
| 6  | 0.438948000  | 3.249307000  | 0.193541000  |
| 6  | 2.736588000  | 0.713353000  | -2.456121000 |
| 6  | 1.651310000  | 2.759200000  | -1.568918000 |
| 6  | 1.946252000  | -2.687071000 | 0.055420000  |
| 6  | -0.417634000 | 1.959483000  | 2.109249000  |
| 6  | 0.715207000  | -2.204135000 | 1.800162000  |
| 6  | -0.308329000 | -0.143173000 | 2.721129000  |
| 6  | 3.647751000  | -1.266352000 | -3.039245000 |
| 6  | 0.580608000  | 4.471250000  | -0.565552000 |
| 6  | 3.565610000  | 0.038565000  | -3.433513000 |
| 6  | 1.333139000  | 4.167986000  | -1.658979000 |
| 6  | 1.771479000  | -3.921408000 | 0.792273000  |
| 6  | -1.161680000 | 1.852782000  | 3.345501000  |
| 6  | 1.006033000  | -3.621492000 | 1.876452000  |
| 6  | -1.093388000 | 0.547287000  | 3.723686000  |
| 1  | 4.164985000  | -2.086009000 | -3.524113000 |
| 1  | 0.151699000  | 5.424133000  | -0.281198000 |
| 1  | 3.999475000  | 0.508837000  | -4.308408000 |
| 1  | 1.653868000  | 4.821535000  | -2.461137000 |
| 1  | 2.187912000  | -4.878748000 | 0.502224000  |
| 1  | -1.651633000 | 2.688739000  | 3.872835000  |
| 1  | 0.662594000  | -4.280906000 | 2.664615000  |
| 1  | -1.529242000 | 0.074350000  | 4.595793000  |
| 6  | 2.686398000  | -2.564277000 | -1.114547000 |
| 6  | -0.269834000 | 3.138723000  | 1.386484000  |
| 6  | -0.025143000 | -1.504301000 | 2.748394000  |
| 6  | 2.418853000  | 2.069643000  | -2.502823000 |
| 1  | 3.161546000  | -3.460789000 | -1.503639000 |
| 1  | -0.738552000 | 4.029343000  | 1.794469000  |
| 1  | -0.422018000 | -2.073704000 | 3.584686000  |
| 1  | 2.801071000  | 2.639676000  | -3.345439000 |
| 8  | 2.822844000  | 0.474100000  | 1.095326000  |
| 16 | -0.732746000 | -0.220074000 | -1.091052000 |
| 1  | -1.431358000 | 0.909489000  | -0.831419000 |
| 6  | 6.310426000  | 2.250330000  | -1.860222000 |
| 6  | 6.728433000  | 2.874215000  | -3.206730000 |
| 7  | 6.690301000  | 0.826616000  | -1.858820000 |
| 8  | 7.544499000  | 2.085821000  | -3.924294000 |
| 8  | 6.386132000  | 3.980723000  | -3.561570000 |
| 1  | 5.228263000  | 2.383113000  | -1.765960000 |
| 1  | 5.888211000  | 0.258628000  | -2.137488000 |
| 1  | 6.944438000  | 0.533507000  | -0.916745000 |
| 6  | 7.015711000  | 3.049291000  | -0.731243000 |
| 6  | 6.838073000  | 2.469719000  | 0.642113000  |
| 1  | 6.629681000  | 4.073922000  | -0.788977000 |
| 1  | 8.089463000  | 3.105792000  | -0.954866000 |
| 6  | 7.849283000  | 2.097063000  | 1.487371000  |
| 7  | 7.309991000  | 1.592315000  | 2.670372000  |
| 6  | 5.946785000  | 1.602532000  | 2.599562000  |
| 6  | 5.591142000  | 2.164493000  | 1.334126000  |
| 1  | 8.920974000  | 2.162174000  | 1.357541000  |
| 6  | 4.990954000  | 1.119968000  | 3.542687000  |
| 6  | 4.255167000  | 2.278118000  | 1.001464000  |
| 6  | 3.192667000  | 1.616843000  | 1.836413000  |
| 6  | 3.679996000  | 1.153724000  | 3.190687000  |
| 1  | 7.846933000  | 1.219639000  | 3.438432000  |
| 1  | 5.321124000  | 0.710574000  | 4.495403000  |
| 1  | 2.917987000  | 0.751337000  | 3.851989000  |
| 1  | 3.925937000  | 2.698815000  | 0.058095000  |
| 1  | 2.342061000  | 2.301233000  | 1.981988000  |
| 1  | 7.611990000  | 1.260351000  | -3.365319000 |
| 8  | -1.928046000 | 5.271811000  | 3.709784000  |
| 7  | -1.086888000 | 5.745018000  | 4.483579000  |
| 8  | -1.307181000 | 6.674507000  | 5.255592000  |



| <sup>4</sup> TS2A: |              |              |              |
|--------------------|--------------|--------------|--------------|
| 26                 | 1.287058000  | 0.281799000  | 0.175332000  |
| 7                  | 2.348323000  | -0.188748000 | -1.494383000 |
| 7                  | 1.144931000  | 2.210261000  | -0.434380000 |
| 7                  | 1.319064000  | -1.670331000 | 0.717800000  |
| 7                  | 0.136680000  | 0.737274000  | 1.771710000  |
| 6                  | 2.845180000  | -1.413454000 | -1.836633000 |
| 6                  | 0.473705000  | 3.234982000  | 0.179407000  |
| 6                  | 2.768616000  | 0.686776000  | -2.453379000 |
| 6                  | 1.718875000  | 2.745817000  | -1.557640000 |
| 6                  | 1.940235000  | -2.701653000 | 0.069293000  |
| 6                  | -0.399947000 | 1.955620000  | 2.099640000  |
| 6                  | 0.772782000  | -2.197238000 | 1.852587000  |
| 6                  | -0.249126000 | -0.130863000 | 2.758236000  |
| 6                  | 3.613337000  | -1.314687000 | -3.058309000 |
| 6                  | 0.635168000  | 4.459366000  | -0.572864000 |
| 6                  | 3.566586000  | -0.006004000 | -3.444095000 |
| 6                  | 1.411128000  | 4.156827000  | -1.650018000 |
| 6                  | 1.772177000  | -3.930992000 | 0.815678000  |
| 6                  | -1.145267000 | 1.859023000  | 3.336109000  |
| 6                  | 1.049257000  | -3.617244000 | 1.924851000  |
| 6                  | -1.047726000 | 0.565048000  | 3.745590000  |
| 1                  | 4.103390000  | -2.145982000 | -3.551202000 |
| 1                  | 0.203954000  | 5.413362000  | -0.295648000 |
| 1                  | 4.006693000  | 0.456968000  | -4.319639000 |
| 1                  | 1.752318000  | 4.811040000  | -2.442968000 |
| 1                  | 2.163864000  | -4.895166000 | 0.514308000  |
| 1                  | -1.661965000 | 2.689737000  | 3.799058000  |
| 1                  | 0.722107000  | -4.270112000 | 2.725191000  |
| 1                  | -1.475513000 | 0.102717000  | 4.627192000  |
| 6                  | 2.648803000  | -2.592127000 | -1.121196000 |
| 6                  | -0.254164000 | 3.125678000  | 1.362377000  |
| 6                  | 0.052840000  | -1.486815000 | 2.808539000  |
| 6                  | 2.480049000  | 2.049692000  | -2.491499000 |
| 1                  | 3.096312000  | -3.498127000 | -1.520880000 |
| 1                  | -0.738203000 | 4.017382000  | 1.749368000  |
| 1                  | -0.325872000 | -2.045936000 | 3.659911000  |
| 1                  | 2.879663000  | 2.619342000  | -3.326188000 |
| 8                  | 2.806463000  | 0.468343000  | 1.032291000  |
| 16                 | -0.796010000 | -0.284436000 | -1.017847000 |
| 1                  | -1.349870000 | 0.949881000  | -1.047871000 |
| 6                  | 6.280163000  | 2.300492000  | -1.835562000 |
| 6                  | 6.616677000  | 2.987400000  | -3.171777000 |
| 7                  | 6.668702000  | 0.881401000  | -1.922669000 |
| 8                  | 7.415260000  | 2.247298000  | -3.959397000 |
| 8                  | 6.232197000  | 4.097592000  | -3.469046000 |
| 1                  | 5.205834000  | 2.422396000  | -1.665318000 |
| 1                  | 5.859841000  | 0.319228000  | -2.191798000 |
| 1                  | 6.960256000  | 0.552452000  | -1.002572000 |
| 6                  | 7.048825000  | 3.034577000  | -0.702401000 |
| 6                  | 6.889871000  | 2.385234000  | 0.641072000  |
| 1                  | 6.691347000  | 4.071093000  | -0.700319000 |
| 1                  | 8.115085000  | 3.068430000  | -0.964983000 |
| 6                  | 7.897182000  | 1.819681000  | 1.386714000  |
| 7                  | 7.373509000  | 1.278641000  | 2.549609000  |
| 6                  | 6.004388000  | 1.453119000  | 2.557485000  |
| 6                  | 5.658659000  | 2.161126000  | 1.374327000  |
| 1                  | 8.959354000  | 1.771797000  | 1.185450000  |
| 6                  | 5.043165000  | 1.061171000  | 3.514268000  |
| 6                  | 4.318375000  | 2.486016000  | 1.141566000  |
| 6                  | 3.308691000  | 1.929285000  | 1.988988000  |
| 6                  | 3.723640000  | 1.330233000  | 3.242988000  |
| 1                  | 7.897020000  | 0.759946000  | 3.236439000  |
| 1                  | 5.341724000  | 0.565471000  | 4.435649000  |
| 1                  | 2.950062000  | 1.029284000  | 3.942742000  |
| 1                  | 4.013735000  | 3.058692000  | 0.272441000  |
| 1                  | 2.336106000  | 2.404358000  | 1.980377000  |
| 1                  | 7.521287000  | 1.400639000  | -3.438278000 |
| 8                  | -2.206293000 | 5.286175000  | 3.581225000  |
| 7                  | -1.559131000 | 5.852546000  | 4.457846000  |
| 8                  | -1.964567000 | 6.733359000  | 5.201532000  |

| <sup>4</sup> Int2A: |              |              |              |
|---------------------|--------------|--------------|--------------|
| 26                  | 1.224314000  | 0.279355000  | 0.169906000  |
| 7                   | 2.318221000  | -0.193169000 | -1.478058000 |
| 7                   | 1.131203000  | 2.219125000  | -0.413550000 |
| 7                   | 1.258828000  | -1.672757000 | 0.711606000  |
| 7                   | 0.101223000  | 0.747825000  | 1.778071000  |
| 6                   | 2.830105000  | -1.413814000 | -1.810776000 |
| 6                   | 0.476883000  | 3.250527000  | 0.250503000  |
| 6                   | 2.745649000  | 0.682770000  | -2.433552000 |
| 6                   | 1.695345000  | 2.746848000  | -1.545013000 |
| 6                   | 1.889926000  | -2.704927000 | 0.075035000  |
| 6                   | -0.412588000 | 1.972562000  | 2.119371000  |
| 6                   | 0.692010000  | -2.199938000 | 1.835817000  |
| 6                   | -0.307535000 | -0.124806000 | 2.751443000  |
| 6                   | 3.617545000  | -1.312149000 | -3.019921000 |
| 6                   | 0.640216000  | 4.472197000  | 0.250501000  |
| 6                   | 3.564591000  | -0.005313000 | -3.410351000 |
| 6                   | 1.398473000  | 4.160054000  | -1.637452000 |
| 6                   | 1.703674000  | -3.935676000 | 0.814923000  |
| 6                   | -1.165017000 | 1.875322000  | 3.350864000  |
| 6                   | 0.960144000  | -3.621729000 | 1.910105000  |
| 6                   | -1.096949000 | 0.574107000  | 3.743579000  |
| 1                   | 4.122729000  | -2.140516000 | -3.502343000 |
| 1                   | 0.222109000  | 5.430925000  | -0.269553000 |
| 1                   | 4.014102000  | 0.459472000  | -4.280064000 |
| 1                   | 1.736809000  | 4.809718000  | -2.435315000 |
| 1                   | 2.099965000  | -4.900033000 | 0.520297000  |
| 1                   | -1.667465000 | 2.709358000  | 3.823501000  |
| 1                   | 0.617562000  | -4.274342000 | 2.704169000  |
| 1                   | -1.537577000 | 0.109575000  | 4.617646000  |
| 6                   | 2.624561000  | -2.593533000 | -1.099293000 |
| 6                   | -0.247533000 | 3.145488000  | 1.390821000  |
| 6                   | -0.028828000 | -1.486610000 | 2.789074000  |
| 6                   | 2.451650000  | 2.044618000  | -2.478456000 |
| 1                   | 3.082754000  | -3.498109000 | -1.490009000 |
| 1                   | -0.717833000 | 4.042370000  | 1.782702000  |
| 1                   | -0.422332000 | -2.047057000 | 3.632898000  |
| 1                   | 2.851400000  | 2.610657000  | -3.315546000 |
| 8                   | 2.821508000  | 0.458652000  | 1.081020000  |
| 16                  | -0.791185000 | -0.220456000 | -1.025894000 |
| 1                   | -1.449393000 | 0.942439000  | -0.811651000 |
| 6                   | 6.344372000  | 2.303557000  | -1.868045000 |
| 6                   | 6.706935000  | 2.958501000  | -3.213145000 |
| 7                   | 6.763443000  | 0.890149000  | -1.900998000 |
| 8                   | 7.534725000  | 2.208161000  | -3.959818000 |
| 8                   | 6.315761000  | 4.054926000  | -3.550804000 |
| 1                   | 5.262972000  | 2.404023000  | -1.735894000 |
| 1                   | 5.966461000  | 0.301899000  | -2.147615000 |
| 1                   | 7.060011000  | 0.603768000  | -0.968245000 |
| 6                   | 7.055846000  | 3.090950000  | -0.732408000 |
| 6                   | 6.905230000  | 2.459502000  | 0.620595000  |
| 1                   | 6.648001000  | 4.108728000  | -0.757652000 |
| 1                   | 8.124161000  | 3.173969000  | -0.975449000 |
| 6                   | 7.933901000  | 2.023860000  | 1.422843000  |
| 7                   | 7.416808000  | 1.466904000  | 2.582063000  |
| 6                   | 6.039322000  | 1.499508000  | 2.531368000  |
| 6                   | 5.668483000  | 2.132420000  | 1.313523000  |
| 1                   | 9.003148000  | 2.082335000  | 1.267302000  |
| 6                   | 5.083018000  | 1.007789000  | 3.467901000  |
| 6                   | 4.321524000  | 2.303587000  | 1.008180000  |
| 6                   | 3.256892000  | 1.598412000  | 1.814795000  |
| 6                   | 3.764084000  | 1.093631000  | 3.151285000  |
| 1                   | 7.960813000  | 1.030652000  | 3.309214000  |
| 1                   | 5.413317000  | 0.567976000  | 4.408151000  |
| 1                   | 3.009232000  | 0.698815000  | 3.826037000  |
| 1                   | 3.998199000  | 2.808352000  | 0.104511000  |
| 1                   | 2.410783000  | 2.279832000  | 1.990639000  |
| 1                   | 7.636813000  | 1.377278000  | -3.412673000 |
| 8                   | -2.197795000 | 5.344744000  | 3.628100000  |
| 7                   | -1.579952000 | 5.904242000  | 4.525221000  |
| 8                   | -1.988914000 | 6.783607000  | 5.264695000  |

**²TS3A:**

|    |              |              |              |
|----|--------------|--------------|--------------|
| 26 | 1.141346000  | 0.172826000  | 0.115410000  |
| 7  | 2.141054000  | 0.164116000  | -1.647118000 |
| 7  | 1.124325000  | 2.241432000  | 0.032302000  |
| 7  | 1.244111000  | -1.822240000 | 0.243790000  |
| 7  | 0.195325000  | 0.237243000  | 1.894148000  |
| 6  | 2.610182000  | -0.956588000 | -2.283040000 |
| 6  | 0.402056000  | 3.072170000  | 0.888550000  |
| 6  | 2.479870000  | 1.229907000  | -2.433629000 |
| 6  | 1.480111000  | 3.033899000  | -1.060707000 |
| 6  | 1.821419000  | -2.663529000 | -0.665543000 |
| 6  | -0.274015000 | 1.345563000  | 2.538481000  |
| 6  | 0.788680000  | -2.610710000 | 1.260975000  |
| 6  | -0.114086000 | -0.831856000 | 2.695961000  |
| 6  | 3.286490000  | -0.583223000 | -3.501550000 |
| 6  | 0.387465000  | 4.408026000  | 0.361504000  |
| 6  | 3.205592000  | 0.777037000  | -3.597090000 |
| 6  | 1.049716000  | 4.385214000  | -0.835192000 |
| 6  | 1.713877000  | -4.036914000 | -0.210945000 |
| 6  | -0.890357000 | 0.968053000  | 3.794824000  |
| 6  | 1.074316000  | -4.004752000 | 0.988804000  |
| 6  | -0.786553000 | -0.385689000 | 3.896178000  |
| 1  | 3.747493000  | -1.279584000 | -4.191566000 |
| 1  | -0.091576000 | 5.252747000  | 0.842076000  |
| 1  | 3.587103000  | 1.421473000  | -4.380039000 |
| 1  | 1.218426000  | 5.207225000  | -1.520576000 |
| 1  | 2.093300000  | -4.895074000 | -0.752744000 |
| 1  | -1.336646000 | 1.666120000  | 4.493408000  |
| 1  | 0.810490000  | -4.809189000 | 1.663188000  |
| 1  | -1.110440000 | -1.063825000 | 4.676098000  |
| 6  | 2.457938000  | -2.266141000 | -1.836092000 |
| 6  | -0.192624000 | 2.659793000  | 2.069890000  |
| 6  | 0.147564000  | -2.165235000 | 2.414244000  |
| 6  | 2.162635000  | 2.568347000  | -2.172161000 |
| 1  | 2.882471000  | -3.049858000 | -2.457982000 |
| 1  | -0.669168000 | 3.426546000  | 2.675184000  |
| 1  | -0.149020000 | -2.913772000 | 3.150838000  |
| 1  | 2.444905000  | 3.299028000  | -2.925460000 |
| 8  | 2.818386000  | 0.206289000  | 1.063585000  |
| 16 | -0.871924000 | -0.031019000 | -1.002551000 |
| 1  | -0.859014000 | 1.156332000  | -1.653614000 |
| 6  | 7.324692000  | 1.596518000  | -1.757289000 |
| 6  | 8.114633000  | 1.526886000  | -3.083183000 |
| 7  | 7.966495000  | 0.702596000  | -0.775767000 |
| 8  | 8.933173000  | 0.466756000  | -3.158414000 |
| 8  | 7.995985000  | 2.339539000  | -3.972630000 |
| 1  | 6.341431000  | 1.167610000  | -1.984276000 |
| 1  | 7.269323000  | 0.288943000  | -0.160513000 |
| 1  | 8.600141000  | 1.230980000  | -0.177024000 |
| 6  | 7.142920000  | 3.074288000  | -1.324664000 |
| 6  | 6.666631000  | 3.264717000  | 0.087074000  |
| 1  | 6.456009000  | 3.538662000  | -2.041931000 |
| 1  | 8.098733000  | 3.599267000  | -1.449754000 |
| 6  | 7.263374000  | 4.067576000  | 1.023552000  |
| 7  | 6.541261000  | 4.034299000  | 2.210901000  |
| 6  | 5.470864000  | 3.191491000  | 2.072413000  |
| 6  | 5.504175000  | 2.681668000  | 0.736983000  |
| 1  | 8.145773000  | 4.687485000  | 0.937289000  |
| 6  | 4.488690000  | 2.815171000  | 3.015278000  |
| 6  | 4.541140000  | 1.761895000  | 0.343098000  |
| 6  | 3.442223000  | 1.400446000  | 1.237386000  |
| 6  | 3.529484000  | 1.920438000  | 2.617418000  |
| 1  | 6.774638000  | 4.544769000  | 3.048382000  |
| 1  | 4.515746000  | 3.201951000  | 4.031504000  |
| 1  | 2.760473000  | 1.575641000  | 3.300739000  |
| 1  | 4.522292000  | 1.321812000  | -0.647215000 |
| 1  | 2.595514000  | 2.168087000  | 0.779620000  |
| 1  | 8.843218000  | 0.031085000  | -2.269057000 |
| 8  | -0.106487000 | -4.893021000 | 4.163021000  |
| 7  | -0.720697000 | -4.578799000 | 5.208678000  |
| 8  | -1.109799000 | -3.398637000 | 5.358594000  |

**²Int3A:**

|    |              |              |               |
|----|--------------|--------------|---------------|
| 26 | 0.880300000  | 0.086401000  | -0.192269000  |
| 7  | 1.494799000  | -0.439776000 | -2.047231000  |
| 7  | 1.718764000  | 2.034826000  | -0.484443000  |
| 7  | 0.181728000  | -1.746838000 | 0.105820000   |
| 7  | 0.307049000  | 0.703412000  | 1.629797000   |
| 6  | 1.440747000  | -1.693450000 | -2.595873000  |
| 6  | 1.387258000  | 3.186409000  | 0.320446000   |
| 6  | 2.083422000  | 0.363493000  | -2.977207000  |
| 6  | 1.987028000  | 2.550764000  | -1.800819000  |
| 6  | 0.251383000  | -2.813524000 | -0.741332000  |
| 6  | 0.503652000  | 1.915012000  | 2.231698000   |
| 6  | -0.459836000 | -2.175904000 | 1.229312000   |
| 6  | -0.304490000 | -0.090786000 | 2.566781000   |
| 6  | 2.035475000  | -1.686463000 | -3.914637000  |
| 6  | 1.568732000  | 4.345475000  | -4.637105000  |
| 6  | 2.431253000  | -0.407201000 | -4.154058000  |
| 6  | 1.921423000  | 3.963927000  | -1.745811000  |
| 6  | -0.384024000 | -3.964674000 | -0.139238000  |
| 6  | 0.030773000  | 1.887291000  | 3.600912000   |
| 6  | -0.829489000 | -3.567271000 | 1.084977000   |
| 6  | -0.482744000 | 0.645356000  | 3.803252000   |
| 1  | 2.121404000  | -2.551979000 | -4.559875000  |
| 1  | 1.402629000  | 5.351992000  | -0.105227000  |
| 1  | 2.915661000  | -0.002858000 | -5.034124000  |
| 1  | 2.081655000  | 4.612284000  | -2.598309000  |
| 1  | -0.467117000 | -4.938999000 | -0.604750000  |
| 1  | 0.135593000  | 2.728739000  | 4.274404000   |
| 1  | -1.351657000 | -4.148543000 | -4.1834857000 |
| 1  | -0.932168000 | 0.238247000  | 4.700765000   |
| 6  | 0.856957000  | -2.800562000 | -1.996059000  |
| 6  | 0.971694000  | 3.091657000  | 1.629654000   |
| 6  | -0.680794000 | -1.412406000 | 2.376122000   |
| 6  | 2.270022000  | 1.751327000  | -2.886127000  |
| 1  | 0.860079000  | -3.731235000 | -2.556469000  |
| 1  | 0.967304000  | 3.983709000  | 2.253958000   |
| 1  | -1.178044000 | -1.906687000 | 3.206181000   |
| 1  | 2.617248000  | 2.253865000  | -3.784636000  |
| 8  | 2.591244000  | -0.570710000 | 0.447662000   |
| 16 | -1.161682000 | 0.737205000  | -1.098721000  |
| 1  | -1.376096000 | 1.844617000  | -0.351146000  |
| 6  | 7.761514000  | 2.254022000  | -0.680161000  |
| 6  | 8.421905000  | 2.650492000  | -2.010759000  |
| 7  | 8.791204000  | 2.221287000  | 0.375467000   |
| 8  | 9.652175000  | 3.173305000  | -1.857514000  |
| 8  | 7.876466000  | 2.544715000  | -3.087195000  |
| 1  | 7.272794000  | 1.283522000  | -0.825765000  |
| 1  | 9.138403000  | 1.273686000  | 0.508212000   |
| 1  | 8.361595000  | 2.502883000  | 1.258976000   |
| 6  | 6.664640000  | 3.299978000  | -0.327341000  |
| 6  | 6.000810000  | 3.033818000  | 0.989009000   |
| 1  | 5.945171000  | 3.297069000  | -1.155042000  |
| 1  | 7.131592000  | 4.294459000  | -0.314190000  |
| 6  | 6.142659000  | 3.777083000  | 2.148958000   |
| 7  | 5.439200000  | 3.220629000  | 3.189279000   |
| 6  | 4.775994000  | 2.115345000  | 2.688145000   |
| 6  | 5.086388000  | 1.964167000  | 1.313534000   |
| 1  | 6.689295000  | 4.702027000  | 2.291234000   |
| 6  | 3.896269000  | 1.245234000  | 3.345317000   |
| 6  | 4.398002000  | 0.986659000  | 0.557137000   |
| 6  | 3.407099000  | 0.196266000  | 1.178682000   |
| 6  | 3.236012000  | 0.290113000  | 2.594583000   |
| 1  | 4.962695000  | 3.782126000  | 3.945537000   |
| 1  | 3.693804000  | 1.369498000  | 4.404877000   |
| 1  | 2.509683000  | -0.370215000 | 3.056758000   |
| 1  | 4.586477000  | 0.844954000  | -0.506162000  |
| 1  | 2.626695000  | 1.683666000  | -0.097411000  |
| 1  | 9.813787000  | 3.092841000  | -0.877084000  |
| 8  | 1.614179000  | 4.749636000  | 4.338952000   |
| 7  | 2.751489000  | 4.358208000  | 3.975843000   |
| 8  | 3.683184000  | 4.503406000  | 4.839562000   |

**4TS3A:**

|    |              |              |              |
|----|--------------|--------------|--------------|
| 26 | 0.931855000  | 0.292635000  | 0.135417000  |
| 7  | 2.020159000  | 0.177564000  | -1.577467000 |
| 7  | 1.085065000  | 2.367922000  | 0.022535000  |
| 7  | 0.862208000  | -1.704673000 | 0.289071000  |
| 7  | -0.144805000 | 0.464187000  | 1.848457000  |
| 6  | 2.477216000  | -0.977213000 | -2.151246000 |
| 6  | 0.361698000  | 3.265793000  | 0.815000000  |
| 6  | 2.445114000  | 1.203878000  | -2.387218000 |
| 6  | 1.507780000  | 3.106836000  | -1.092814000 |
| 6  | 1.477501000  | -2.598355000 | -0.552259000 |
| 6  | -0.565334000 | 1.622654000  | 2.443473000  |
| 6  | 0.270831000  | -2.439191000 | 1.275387000  |
| 6  | -0.615687000 | -0.559899000 | 2.626677000  |
| 6  | 3.225497000  | -0.680901000 | -3.336795000 |
| 6  | 0.448981000  | 4.586704000  | 0.249654000  |
| 6  | 3.198606000  | 0.686620000  | -3.488247000 |
| 6  | 1.148719000  | 4.491437000  | -0.917564000 |
| 6  | 1.242191000  | -3.952883000 | -0.086645000 |
| 6  | -1.314235000 | 1.329591000  | 3.632388000  |
| 6  | 0.493420000  | -3.855021000 | 1.041919000  |
| 6  | -1.344131000 | -0.035682000 | 3.748706000  |
| 1  | 3.691235000  | -1.418865000 | -3.978734000 |
| 1  | 0.003706000  | 5.470023000  | 0.691354000  |
| 1  | 3.648780000  | 1.285587000  | -4.270825000 |
| 1  | 1.388817000  | 5.280834000  | -1.619655000 |
| 1  | 1.614655000  | -4.845177000 | -0.575656000 |
| 1  | -1.737995000 | 2.077000000  | 4.291411000  |
| 1  | 0.121047000  | -4.649719000 | 1.677445000  |
| 1  | -1.816762000 | -0.636631000 | 4.516322000  |
| 6  | 2.227880000  | -2.274266000 | -1.666193000 |
| 6  | -0.334918000 | 2.924950000  | 1.960513000  |
| 6  | -0.424807000 | -1.920122000 | 2.359842000  |
| 6  | 2.184246000  | 2.567844000  | -2.165914000 |
| 1  | 2.656549000  | -3.097291000 | -2.232084000 |
| 1  | -0.818762000 | 3.732133000  | 2.498692000  |
| 1  | -0.850485000 | -2.628612000 | 3.065248000  |
| 1  | 2.523661000  | 3.259261000  | -2.933405000 |
| 8  | 2.520699000  | 0.249347000  | 1.178951000  |
| 16 | -1.037366000 | 0.217227000  | -1.119698000 |
| 1  | -0.875384000 | 1.372718000  | -1.806691000 |
| 6  | 7.278089000  | 1.135419000  | -1.391402000 |
| 6  | 8.240393000  | 0.869446000  | -2.568609000 |
| 7  | 7.682815000  | 0.288987000  | -0.251449000 |
| 8  | 8.967218000  | -0.249317000 | -2.416070000 |
| 8  | 8.325045000  | 1.587047000  | -3.540684000 |
| 1  | 6.299461000  | 0.772717000  | -1.727800000 |
| 1  | 6.859487000  | -0.003283000 | 0.272249000  |
| 1  | 8.245424000  | 0.835779000  | 0.400122000  |
| 6  | 7.177595000  | 2.659014000  | -1.108115000 |
| 6  | 6.615223000  | 3.007989000  | 0.240821000  |
| 1  | 6.581346000  | 3.099026000  | -1.916599000 |
| 1  | 8.176406000  | 3.104185000  | -1.203873000 |
| 6  | 7.188943000  | 3.875269000  | 1.138166000  |
| 7  | 6.392799000  | 3.985387000  | 2.266982000  |
| 6  | 5.289519000  | 3.174029000  | 2.129284000  |
| 6  | 5.385621000  | 2.538801000  | 0.855926000  |
| 1  | 8.103493000  | 4.447372000  | 1.052421000  |
| 6  | 4.235319000  | 2.920224000  | 3.033169000  |
| 6  | 4.402284000  | 1.626197000  | 0.475313000  |
| 6  | 3.229562000  | 1.413130000  | 1.316140000  |
| 6  | 3.265205000  | 2.027867000  | 2.654075000  |
| 1  | 6.583568000  | 4.574218000  | 3.062036000  |
| 1  | 4.190696000  | 3.403632000  | 4.005278000  |
| 1  | 2.442257000  | 1.793626000  | 3.319805000  |
| 1  | 4.429126000  | 1.102338000  | -0.473266000 |
| 1  | 2.403712000  | 2.192767000  | 0.759914000  |
| 1  | 8.706647000  | -0.574933000 | -1.511402000 |
| 8  | -0.239785000 | 4.666021000  | 4.849351000  |
| 7  | 0.763468000  | 4.055982000  | 4.505844000  |
| 8  | 1.768479000  | 3.873978000  | 5.177454000  |

**4Int3A:**

|    |              |              |              |
|----|--------------|--------------|--------------|
| 26 | 0.929515000  | 0.969512000  | 0.094773000  |
| 7  | 1.758238000  | 1.516350000  | -1.672810000 |
| 7  | -0.067696000 | 2.910294000  | 0.220459000  |
| 7  | 1.982613000  | -0.704995000 | 0.076234000  |
| 7  | 0.093333000  | 0.544828000  | 1.890305000  |
| 6  | 2.645660000  | 0.793121000  | -2.426360000 |
| 6  | -1.197546000 | 3.173181000  | 1.058689000  |
| 6  | 1.515960000  | 2.676548000  | -2.375782000 |
| 6  | -0.216402000 | 3.754789000  | -0.929050000 |
| 6  | 2.835468000  | -1.153553000 | -0.907220000 |
| 6  | -0.818959000 | 1.266654000  | 2.618648000  |
| 6  | 1.982803000  | -1.651027000 | 1.069533000  |
| 6  | 0.382927000  | -0.569213000 | 2.637597000  |
| 6  | 2.988038000  | 1.505961000  | -3.615544000 |
| 6  | -1.958643000 | 4.224739000  | 0.462160000  |
| 6  | 2.276537000  | 2.685357000  | -3.582919000 |
| 6  | -1.367949000 | 4.577521000  | -0.722680000 |
| 6  | 3.392579000  | -2.436533000 | -0.518323000 |
| 6  | -1.106248000 | 0.605248000  | 3.850938000  |
| 6  | 2.870822000  | -2.738457000 | 0.699949000  |
| 6  | -0.349845000 | -0.544061000 | 3.866589000  |
| 1  | 3.673385000  | 1.151708000  | -4.375666000 |
| 1  | -2.881143000 | 4.614144000  | 0.875467000  |
| 1  | 2.270819000  | 3.486466000  | -4.312538000 |
| 1  | -1.730438000 | 5.300638000  | -1.443502000 |
| 1  | 4.096560000  | -2.998121000 | -1.119962000 |
| 1  | -1.783926000 | 0.978450000  | 4.608992000  |
| 1  | 3.050860000  | -3.615010000 | 1.311491000  |
| 1  | -0.297813000 | -1.304985000 | 4.636028000  |
| 6  | 3.146396000  | -0.480174000 | -2.071969000 |
| 6  | -1.458356000 | 2.464951000  | 2.202949000  |
| 6  | 1.258450000  | -1.596448000 | 2.247564000  |
| 6  | 0.575799000  | 3.680097000  | -2.041225000 |
| 1  | 3.868048000  | -0.942590000 | -2.738642000 |
| 1  | -2.292380000 | 2.800087000  | 2.812335000  |
| 1  | 1.375968000  | -2.427200000 | 2.938265000  |
| 1  | 0.412580000  | 4.442623000  | -2.799669000 |
| 8  | 2.190553000  | 2.111686000  | 1.111049000  |
| 16 | -0.856247000 | 0.004049000  | -0.969242000 |
| 1  | -0.196556000 | -0.502018000 | -2.035673000 |
| 6  | 6.845944000  | -0.885957000 | -0.409647000 |
| 6  | 7.128212000  | -1.935625000 | -1.496541000 |
| 7  | 7.648350000  | -1.216242000 | 0.785947000  |
| 8  | 8.228626000  | -2.669163000 | -1.253685000 |
| 8  | 6.453097000  | -2.072194000 | -2.495062000 |
| 1  | 5.770707000  | -0.897759000 | -0.207868000 |
| 1  | 7.083342000  | -1.743899000 | 1.448869000  |
| 1  | 7.908972000  | -0.347098000 | 1.254312000  |
| 6  | 7.230134000  | 0.519261000  | -0.952890000 |
| 6  | 7.072638000  | 1.607556000  | 0.067359000  |
| 1  | 6.601586000  | 0.702150000  | -1.831964000 |
| 1  | 8.271586000  | 0.485554000  | -1.302146000 |
| 6  | 8.089711000  | 2.337122000  | 0.645186000  |
| 7  | 7.565207000  | 3.233067000  | 1.555381000  |
| 6  | 6.180728000  | 3.101779000  | 1.573382000  |
| 6  | 5.836130000  | 2.080814000  | 0.654243000  |
| 1  | 9.155389000  | 2.299037000  | 0.457382000  |
| 6  | 5.199637000  | 3.776066000  | 2.310790000  |
| 6  | 4.488786000  | 1.722838000  | 0.468148000  |
| 6  | 3.487421000  | 2.382324000  | 1.196753000  |
| 6  | 3.876801000  | 3.410649000  | 2.116003000  |
| 1  | 8.091149000  | 3.931276000  | 2.054858000  |
| 1  | 5.460141000  | 4.562373000  | 3.017117000  |
| 1  | 3.082484000  | 3.902672000  | 2.670306000  |
| 1  | 4.210744000  | 0.954991000  | -0.239725000 |
| 1  | 0.835479000  | 3.074148000  | 0.724116000  |
| 1  | 8.519885000  | -2.348851000 | -0.354764000 |
| 8  | -1.016272000 | 4.326067000  | 4.943157000  |
| 7  | -0.238462000 | 4.191107000  | 4.019044000  |
| 8  | 0.676398000  | 4.908342000  | 3.673268000  |

**²TS4A:**

|    |              |              |              |
|----|--------------|--------------|--------------|
| 26 | 1.509262000  | 0.119696000  | -0.357359000 |
| 7  | 2.220934000  | -0.374382000 | -2.191790000 |
| 7  | 1.286383000  | 2.039897000  | -0.963277000 |
| 7  | 1.565910000  | -1.828193000 | 0.187575000  |
| 7  | 0.684704000  | 0.598303000  | 1.435566000  |
| 6  | 2.592366000  | -1.619015000 | -2.614911000 |
| 6  | 0.813510000  | 3.084837000  | -0.217521000 |
| 6  | 2.479683000  | 0.481779000  | -3.223973000 |
| 6  | 1.686072000  | 2.566501000  | -2.162073000 |
| 6  | 2.022618000  | -2.873769000 | -0.564867000 |
| 6  | 0.275960000  | 1.834669000  | 1.845254000  |
| 6  | 1.220641000  | -2.343337000 | 1.405418000  |
| 6  | 0.461597000  | -0.252560000 | 2.480533000  |
| 6  | 3.106379000  | -1.549947000 | -3.966871000 |
| 6  | 0.905033000  | 4.314579000  | -0.973829000 |
| 6  | 3.040121000  | -0.244829000 | -4.344511000 |
| 6  | 1.450427000  | 3.993435000  | -2.179290000 |
| 6  | 1.957701000  | -4.099050000 | 0.200692000  |
| 6  | -0.223900000 | 1.768927000  | 3.203774000  |
| 6  | 1.461298000  | -3.769319000 | 1.424906000  |
| 6  | -0.104698000 | 0.472122000  | 3.598641000  |
| 1  | 3.466774000  | -2.400221000 | -4.533427000 |
| 1  | 0.595406000  | 5.286863000  | -0.610040000 |
| 1  | 3.340743000  | 0.207120000  | -5.281394000 |
| 1  | 1.684468000  | 4.645821000  | -3.011482000 |
| 1  | 2.256826000  | -5.072983000 | -0.167931000 |
| 1  | -0.611586000 | 2.613524000  | 3.760723000  |
| 1  | 1.266465000  | -4.415789000 | 2.272270000  |
| 1  | -0.376638000 | 0.027042000  | 4.548270000  |
| 6  | 2.499992000  | -2.786914000 | -1.868283000 |
| 6  | 0.328998000  | 2.997622000  | 1.083728000  |
| 6  | 0.713067000  | -1.618902000 | 2.478510000  |
| 6  | 2.242680000  | 1.851387000  | -3.217391000 |
| 1  | 2.831088000  | -3.708022000 | -2.339876000 |
| 1  | -0.031899000 | 3.913611000  | 1.543549000  |
| 1  | 0.480612000  | -2.170129000 | 3.385517000  |
| 1  | 2.517936000  | 2.408854000  | -4.107489000 |
| 8  | 3.045226000  | 0.408916000  | 0.198816000  |
| 16 | -0.748289000 | -0.404108000 | -1.170920000 |
| 1  | -1.092598000 | 0.829252000  | -1.609296000 |
| 6  | 5.660579000  | 2.182499000  | -1.223964000 |
| 6  | 5.926007000  | 2.707614000  | -2.655075000 |
| 7  | 5.521817000  | 0.720231000  | -1.269259000 |
| 8  | 5.838811000  | 1.750177000  | -3.583531000 |
| 8  | 6.191036000  | 3.866320000  | -2.906425000 |
| 1  | 4.697422000  | 2.604943000  | -0.916291000 |
| 1  | 4.637674000  | 0.444784000  | -0.815732000 |
| 1  | 6.276014000  | 0.268815000  | -0.755237000 |
| 6  | 6.770665000  | 2.713622000  | -0.281769000 |
| 6  | 6.680791000  | 2.204839000  | 1.126281000  |
| 1  | 6.731952000  | 3.808125000  | -0.318036000 |
| 1  | 7.747883000  | 2.430237000  | -0.697443000 |
| 6  | 7.600656000  | 1.399417000  | 1.746551000  |
| 7  | 7.189665000  | 1.115912000  | 3.043940000  |
| 6  | 5.977023000  | 1.714292000  | 3.273800000  |
| 6  | 5.621246000  | 2.428932000  | 2.093628000  |
| 1  | 8.540683000  | 1.014834000  | 1.373957000  |
| 6  | 5.127880000  | 1.638021000  | 4.406142000  |
| 6  | 4.415489000  | 3.118091000  | 2.048296000  |
| 6  | 3.568272000  | 3.168435000  | 3.234574000  |
| 6  | 3.940495000  | 2.310763000  | 4.374519000  |
| 1  | 7.658001000  | 0.487533000  | 3.677480000  |
| 1  | 5.399405000  | 1.024601000  | 5.262340000  |
| 1  | 3.250121000  | 2.259950000  | 5.208747000  |
| 1  | 4.083220000  | 3.628526000  | 1.152509000  |
| 1  | 2.496582000  | 3.179095000  | 3.024692000  |
| 1  | 5.628331000  | 0.931584000  | -3.035027000 |
| 8  | 4.261573000  | 5.658669000  | 3.270754000  |
| 7  | 3.612891000  | 4.821317000  | 3.874487000  |
| 8  | 2.957732000  | 5.009760000  | 4.890964000  |

**⁴TS4A:**

|    |              |              |              |
|----|--------------|--------------|--------------|
| 26 | 1.511381000  | 0.096929000  | -0.361728000 |
| 7  | 2.216287000  | -0.390710000 | -2.200092000 |
| 7  | 1.299994000  | 2.022574000  | -0.956307000 |
| 7  | 1.556143000  | -1.853776000 | 0.172303000  |
| 7  | 0.694083000  | 0.571012000  | 1.436159000  |
| 6  | 2.578684000  | -1.635308000 | -2.631036000 |
| 6  | 0.835267000  | 3.066022000  | -0.203587000 |
| 6  | 2.479305000  | 0.469764000  | -3.227687000 |
| 6  | 1.701213000  | 2.553617000  | -2.152628000 |
| 6  | 2.003882000  | -2.898111000 | -0.587338000 |
| 6  | 0.294104000  | 1.807617000  | 1.853401000  |
| 6  | 1.210032000  | -2.373633000 | 1.387936000  |
| 6  | 0.467603000  | -0.284047000 | 2.476843000  |
| 6  | 3.091307000  | -1.561772000 | -3.983270000 |
| 6  | 0.933802000  | 4.299685000  | -0.952653000 |
| 6  | 3.033408000  | -0.254014000 | -4.353149000 |
| 6  | 1.475241000  | 3.982191000  | -2.160939000 |
| 6  | 1.932069000  | -4.127334000 | 0.171182000  |
| 6  | -0.203720000 | 1.737629000  | 3.212478000  |
| 6  | 1.440739000  | -3.801328000 | 1.398454000  |
| 6  | -0.092119000 | 0.438045000  | 3.600035000  |
| 1  | 3.445135000  | -2.411127000 | -4.555322000 |
| 1  | 0.630939000  | 5.271815000  | -0.582762000 |
| 1  | 3.335620000  | 0.201388000  | -5.287863000 |
| 1  | 1.712427000  | 4.638013000  | -2.989525000 |
| 1  | 2.223525000  | -5.101160000 | -0.203809000 |
| 1  | -0.585401000 | 2.581593000  | 3.774556000  |
| 1  | 1.243277000  | -4.451413000 | 2.242442000  |
| 1  | -0.365160000 | -0.010575000 | 4.547688000  |
| 6  | 2.479443000  | -2.806912000 | -1.891077000 |
| 6  | 0.352438000  | 2.974292000  | 1.098086000  |
| 6  | 0.709854000  | -1.651997000 | 2.466445000  |
| 6  | 2.251206000  | 1.840844000  | -3.213027000 |
| 1  | 2.803322000  | -3.727514000 | -2.368638000 |
| 1  | -0.003200000 | 3.889675000  | 1.563288000  |
| 1  | 0.475522000  | -2.206963000 | 3.370691000  |
| 1  | 2.528887000  | 2.401573000  | -4.100309000 |
| 8  | 3.049901000  | 0.374890000  | 0.193197000  |
| 16 | -0.751535000 | -0.405633000 | -1.172551000 |
| 1  | -1.082210000 | 0.828310000  | -1.619649000 |
| 6  | 5.654581000  | 2.187474000  | -1.219591000 |
| 6  | 5.916066000  | 2.718411000  | -2.649437000 |
| 7  | 5.521180000  | 0.724925000  | -1.270003000 |
| 8  | 5.833974000  | 1.763145000  | -3.580502000 |
| 8  | 6.174196000  | 3.879408000  | -2.897403000 |
| 1  | 4.690992000  | 2.606440000  | -0.908368000 |
| 1  | 4.637069000  | 0.443168000  | -0.819894000 |
| 1  | 6.275785000  | 0.274382000  | -0.755851000 |
| 6  | 6.765157000  | 2.718082000  | -0.277736000 |
| 6  | 6.670041000  | 2.215280000  | 1.131968000  |
| 1  | 6.730741000  | 3.812536000  | -0.318298000 |
| 1  | 7.741750000  | 2.428825000  | -0.690925000 |
| 6  | 7.575802000  | 1.394824000  | 1.753084000  |
| 7  | 7.161327000  | 1.121733000  | 3.051678000  |
| 6  | 5.960117000  | 1.742382000  | 3.281582000  |
| 6  | 5.615991000  | 2.461007000  | 2.100114000  |
| 1  | 8.508254000  | 0.992275000  | 1.380445000  |
| 6  | 5.111270000  | 1.684645000  | 4.415028000  |
| 6  | 4.423807000  | 3.172927000  | 2.054942000  |
| 6  | 3.577594000  | 3.239895000  | 3.241046000  |
| 6  | 3.936080000  | 2.378508000  | 4.382878000  |
| 1  | 7.617897000  | 0.484755000  | 3.685244000  |
| 1  | 5.372531000  | 1.068772000  | 5.272628000  |
| 1  | 3.245857000  | 2.342394000  | 5.218059000  |
| 1  | 4.100294000  | 3.687124000  | 1.157850000  |
| 1  | 2.506109000  | 3.267255000  | 3.031819000  |
| 1  | 5.628189000  | 0.941965000  | -3.033803000 |
| 8  | 4.341675000  | 5.708899000  | 3.296563000  |
| 7  | 3.650413000  | 4.891467000  | 3.879844000  |
| 8  | 2.973754000  | 5.098176000  | 4.878613000  |

| <sup>2</sup> Int4A: |              |              |              |
|---------------------|--------------|--------------|--------------|
| 26                  | 1.515887000  | 0.120406000  | -0.337914000 |
| 7                   | 2.213121000  | -0.363069000 | -2.180654000 |
| 7                   | 1.300962000  | 2.046640000  | -0.927240000 |
| 7                   | 1.563742000  | -1.832183000 | 0.191247000  |
| 7                   | 0.705779000  | 0.589091000  | 1.464095000  |
| 6                   | 2.574142000  | -1.606543000 | -2.615970000 |
| 6                   | 0.839080000  | 3.088194000  | -0.170188000 |
| 6                   | 2.471257000  | 0.499692000  | -3.207442000 |
| 6                   | 1.696772000  | 2.580579000  | -2.124101000 |
| 6                   | 2.008416000  | -2.874514000 | -0.572872000 |
| 6                   | 0.308907000  | 1.824905000  | 1.886845000  |
| 6                   | 1.221894000  | -2.355339000 | 1.406577000  |
| 6                   | 0.484337000  | -0.268504000 | 2.503903000  |
| 6                   | 3.080626000  | -1.529837000 | -3.970351000 |
| 6                   | 0.933568000  | 4.323602000  | -0.916906000 |
| 6                   | 3.020462000  | -0.221330000 | -4.337121000 |
| 6                   | 1.469854000  | 4.009031000  | -2.128231000 |
| 6                   | 1.939285000  | -4.105832000 | 0.182562000  |
| 6                   | -0.180265000 | 1.752124000  | 3.249003000  |
| 6                   | 1.452409000  | -3.783118000 | 1.412463000  |
| 6                   | -0.067955000 | 0.451351000  | 3.632232000  |
| 1                   | 3.432274000  | -2.377763000 | -4.545848000 |
| 1                   | 0.631584000  | 5.294670000  | -0.543523000 |
| 1                   | 3.318575000  | 0.236252000  | -5.272065000 |
| 1                   | 1.702535000  | 4.666747000  | -2.956621000 |
| 1                   | 2.229200000  | -5.078672000 | -0.196156000 |
| 1                   | -0.554647000 | 2.595787000  | 3.816243000  |
| 1                   | 1.257781000  | -4.435451000 | 2.255373000  |
| 1                   | -0.335266000 | 0.000682000  | 4.580544000  |
| 6                   | 2.478559000  | -2.779888000 | -1.878355000 |
| 6                   | 0.363198000  | 2.993536000  | 1.133875000  |
| 6                   | 0.726089000  | -1.636423000 | 2.488969000  |
| 6                   | 2.242767000  | 1.870670000  | -3.188450000 |
| 1                   | 2.800659000  | -3.699222000 | -2.359549000 |
| 1                   | 0.010871000  | 3.907785000  | 1.603737000  |
| 1                   | 0.495446000  | -2.193618000 | 3.392792000  |
| 1                   | 2.515956000  | 2.433557000  | -4.075793000 |
| 8                   | 3.056647000  | 0.396507000  | 0.211617000  |
| 16                  | -0.749766000 | -0.383235000 | -1.141646000 |
| 1                   | -1.085153000 | 0.852854000  | -1.579282000 |
| 6                   | 5.684234000  | 2.170845000  | -1.230231000 |
| 6                   | 5.954923000  | 2.693825000  | -2.661002000 |
| 7                   | 5.520535000  | 0.711316000  | -1.277876000 |
| 8                   | 5.847765000  | 1.739831000  | -3.590941000 |
| 8                   | 6.239085000  | 3.848302000  | -2.911257000 |
| 1                   | 4.729451000  | 2.609524000  | -0.918949000 |
| 1                   | 4.635682000  | 0.447016000  | -0.818866000 |
| 1                   | 6.270666000  | 0.246580000  | -0.769730000 |
| 6                   | 6.804996000  | 2.679360000  | -0.288101000 |
| 6                   | 6.690507000  | 2.184469000  | 1.122693000  |
| 1                   | 6.797541000  | 3.774159000  | -0.334266000 |
| 1                   | 7.775343000  | 2.364178000  | -0.697250000 |
| 6                   | 7.566128000  | 1.335069000  | 1.749824000  |
| 7                   | 7.134841000  | 1.075620000  | 3.044441000  |
| 6                   | 5.950474000  | 1.734110000  | 3.264475000  |
| 6                   | 5.636629000  | 2.462943000  | 2.082438000  |
| 1                   | 8.487065000  | 0.902198000  | 1.382492000  |
| 6                   | 5.092300000  | 1.705828000  | 4.395425000  |
| 6                   | 4.474232000  | 3.219204000  | 2.024128000  |
| 6                   | 3.579780000  | 3.295355000  | 3.201275000  |
| 6                   | 3.939513000  | 2.427772000  | 4.364119000  |
| 1                   | 7.562063000  | 0.418796000  | 3.678083000  |
| 1                   | 5.334149000  | 1.087237000  | 5.257110000  |
| 1                   | 3.244608000  | 2.412025000  | 5.195917000  |
| 1                   | 4.181203000  | 3.750875000  | 1.126901000  |
| 1                   | 2.521902000  | 3.184708000  | 2.933025000  |
| 1                   | 5.624990000  | 0.923999000  | -3.042881000 |
| 8                   | 4.269734000  | 5.659726000  | 3.269168000  |
| 7                   | 3.530140000  | 4.824682000  | 3.768252000  |
| 8                   | 2.730329000  | 5.031133000  | 4.675555000  |

| <sup>4</sup> Int4A: |              |              |              |
|---------------------|--------------|--------------|--------------|
| 26                  | 1.541711000  | 0.067227000  | -0.319744000 |
| 7                   | 2.210830000  | -0.360519000 | -2.186378000 |
| 7                   | 1.312763000  | 2.008571000  | -0.852313000 |
| 7                   | 1.603575000  | -1.898423000 | 0.155268000  |
| 7                   | 0.758765000  | 0.481759000  | 1.507813000  |
| 6                   | 2.563123000  | -1.591193000 | -2.663290000 |
| 6                   | 0.848764000  | 3.024007000  | -0.062798000 |
| 6                   | 2.457476000  | 0.531942000  | -3.190287000 |
| 6                   | 1.694642000  | 2.579119000  | -2.037015000 |
| 6                   | 2.034046000  | -2.917859000 | -0.647329000 |
| 6                   | 0.355870000  | 1.702026000  | 1.967033000  |
| 6                   | 1.288539000  | -2.456269000 | 1.362210000  |
| 6                   | 0.561186000  | -0.403749000 | 2.528658000  |
| 6                   | 3.050398000  | -1.475327000 | -4.021767000 |
| 6                   | 0.927262000  | 4.280910000  | -4.774875000 |
| 6                   | 2.989006000  | -0.156123000 | -4.348455000 |
| 6                   | 1.457635000  | 4.005360000  | -1.998402000 |
| 6                   | 1.982867000  | -4.169995000 | 0.074416000  |
| 6                   | -0.113270000 | 1.590097000  | 3.333423000  |
| 6                   | 1.521917000  | -3.883026000 | 1.323124000  |
| 6                   | 0.017956000  | 0.281953000  | 3.682755000  |
| 1                   | 3.391474000  | -2.306453000 | -4.627338000 |
| 1                   | 0.618879000  | 5.238414000  | -0.372631000 |
| 1                   | 3.274314000  | 0.328037000  | -5.274047000 |
| 1                   | 1.677026000  | 4.688221000  | -2.809994000 |
| 1                   | 2.266137000  | -5.131189000 | -0.337593000 |
| 1                   | -0.490808000 | 2.415035000  | 3.925710000  |
| 1                   | 1.345972000  | -4.559424000 | 2.151076000  |
| 1                   | -0.231370000 | -0.195247000 | 4.623002000  |
| 6                   | 2.479282000  | -2.785250000 | -1.958182000 |
| 6                   | 0.387001000  | 2.889463000  | 1.243437000  |
| 6                   | 0.811198000  | -1.769002000 | 2.473554000  |
| 6                   | 2.230537000  | 1.902114000  | -3.127542000 |
| 1                   | 2.792519000  | -3.690246000 | -2.471385000 |
| 1                   | 0.024597000  | 3.786433000  | 1.738688000  |
| 1                   | 0.599595000  | -2.351688000 | 3.365926000  |
| 1                   | 2.492088000  | 2.491031000  | -4.001494000 |
| 8                   | 3.089427000  | 0.331833000  | 0.214701000  |
| 16                  | -0.734117000 | -0.419403000 | -1.104758000 |
| 1                   | -1.033040000 | 0.795749000  | -1.620592000 |
| 6                   | 5.734276000  | 2.130722000  | -1.236396000 |
| 6                   | 6.054039000  | 2.678416000  | -2.647935000 |
| 7                   | 5.509892000  | 0.682288000  | -1.326804000 |
| 8                   | 5.880156000  | 1.765561000  | -3.608617000 |
| 8                   | 6.420608000  | 3.817111000  | -2.860555000 |
| 1                   | 4.789316000  | 2.597658000  | -0.934927000 |
| 1                   | 4.634159000  | 0.428536000  | -0.844398000 |
| 1                   | 6.262755000  | 0.169874000  | -0.871197000 |
| 6                   | 6.846303000  | 2.568101000  | -0.250413000 |
| 6                   | 6.621188000  | 2.098980000  | 1.154947000  |
| 1                   | 6.921588000  | 3.659891000  | -0.303476000 |
| 1                   | 7.807718000  | 2.177252000  | -0.613312000 |
| 6                   | 7.335623000  | 1.132214000  | 1.814126000  |
| 7                   | 6.813921000  | 0.938123000  | 3.087321000  |
| 6                   | 5.727143000  | 1.758606000  | 3.257874000  |
| 6                   | 5.576626000  | 2.526330000  | 2.068423000  |
| 1                   | 8.198268000  | 0.568188000  | 1.485326000  |
| 6                   | 4.824711000  | 1.857653000  | 4.349269000  |
| 6                   | 4.544226000  | 3.446936000  | 1.963413000  |
| 6                   | 3.610512000  | 3.646379000  | 3.095654000  |
| 6                   | 3.791757000  | 2.739362000  | 4.270779000  |
| 1                   | 7.099495000  | 0.212409000  | 3.725624000  |
| 1                   | 4.934626000  | 1.211767000  | 5.217638000  |
| 1                   | 3.064438000  | 2.823298000  | 5.070116000  |
| 1                   | 4.379071000  | 4.020401000  | 1.058622000  |
| 1                   | 2.561179000  | 3.671961000  | 2.774823000  |
| 1                   | 5.604786000  | 0.948451000  | -3.087243000 |
| 8                   | 4.614198000  | 5.889527000  | 3.224546000  |
| 7                   | 3.733377000  | 5.166326000  | 3.665651000  |
| 8                   | 2.909861000  | 5.483375000  | 4.518524000  |

| <sup>2</sup> TS5A: |              |              |              |
|--------------------|--------------|--------------|--------------|
| 26                 | 1.619871000  | -0.116949000 | -0.181853000 |
| 7                  | 2.426952000  | -0.698197000 | -1.957520000 |
| 7                  | 1.863151000  | 1.816551000  | -0.690464000 |
| 7                  | 1.235940000  | -2.065102000 | 0.255976000  |
| 7                  | 0.705564000  | 0.458203000  | 1.528919000  |
| 6                  | 2.616277000  | -1.979559000 | -2.393850000 |
| 6                  | 1.505963000  | 2.914276000  | 0.043789000  |
| 6                  | 2.933360000  | 0.124750000  | -2.921185000 |
| 6                  | 2.433854000  | 2.290700000  | -1.842263000 |
| 6                  | 1.591830000  | -3.160730000 | -0.481258000 |
| 6                  | 0.524107000  | 1.735478000  | 1.974690000  |
| 6                  | 0.647649000  | -2.535764000 | 1.394586000  |
| 6                  | 0.186643000  | -0.367000000 | 2.487067000  |
| 6                  | 3.265724000  | -1.970824000 | -3.685979000 |
| 6                  | 1.862872000  | 4.123631000  | -0.664409000 |
| 6                  | 3.462049000  | -0.660299000 | -4.016358000 |
| 6                  | 2.437894000  | 3.737210000  | -1.833891000 |
| 6                  | 1.202616000  | -4.370605000 | 0.209961000  |
| 6                  | -0.131480000 | 1.723829000  | 3.265188000  |
| 6                  | 0.615736000  | -3.982241000 | 1.375436000  |
| 6                  | -0.342014000 | 0.418588000  | 3.582934000  |
| 1                  | 3.512144000  | -2.855846000 | -4.260963000 |
| 1                  | 1.698476000  | 5.126050000  | -0.289781000 |
| 1                  | 3.901765000  | -0.249062000 | -4.917705000 |
| 1                  | 2.841628000  | 4.355237000  | -2.626344000 |
| 1                  | 1.366474000  | -5.374578000 | -0.163325000 |
| 1                  | -0.385660000 | 2.609705000  | 3.834220000  |
| 1                  | 0.196936000  | -4.600366000 | 2.160637000  |
| 1                  | -0.808834000 | 0.004283000  | 4.468551000  |
| 6                  | 2.232082000  | -3.131278000 | -1.714891000 |
| 6                  | 0.891523000  | 2.887247000  | 1.289913000  |
| 6                  | 0.155903000  | -1.754155000 | 2.435356000  |
| 6                  | 2.943280000  | 1.516329000  | -2.876375000 |
| 1                  | 2.446706000  | -4.085205000 | -2.189041000 |
| 1                  | 0.685360000  | 3.841008000  | 1.765753000  |
| 1                  | -0.291596000 | -2.273513000 | 3.278369000  |
| 1                  | 3.372673000  | 2.040296000  | -3.725654000 |
| 8                  | 3.112775000  | -0.256742000 | 0.580507000  |
| 16                 | -0.537720000 | 0.009715000  | -1.303841000 |
| 1                  | -0.670323000 | -1.304149000 | -1.598808000 |
| 6                  | 7.015370000  | 0.448702000  | -3.043741000 |
| 6                  | 7.306641000  | 1.010942000  | -4.448585000 |
| 7                  | 6.812848000  | -1.006362000 | -3.148813000 |
| 8                  | 7.558564000  | 0.054096000  | -5.357466000 |
| 8                  | 7.345291000  | 2.195528000  | -4.699641000 |
| 1                  | 6.127066000  | 0.962709000  | -2.660087000 |
| 1                  | 5.815555000  | -1.213154000 | -3.227074000 |
| 1                  | 7.142329000  | -1.459761000 | -2.297242000 |
| 6                  | 8.224049000  | 0.789641000  | -2.129318000 |
| 6                  | 8.118011000  | 0.202872000  | -0.753214000 |
| 1                  | 8.301482000  | 1.882702000  | -2.101083000 |
| 1                  | 9.139931000  | 0.419526000  | -2.609875000 |
| 6                  | 8.936724000  | -0.769378000 | -0.226819000 |
| 7                  | 8.521774000  | -1.091352000 | 1.053671000  |
| 6                  | 7.402212000  | -0.351152000 | 1.367774000  |
| 6                  | 7.115150000  | 0.489798000  | 0.257429000  |
| 1                  | 9.800447000  | -1.251908000 | -0.664943000 |
| 6                  | 6.623744000  | -0.335329000 | 2.553932000  |
| 6                  | 6.037703000  | 1.371067000  | 0.308623000  |
| 6                  | 5.100774000  | 1.289924000  | 1.442670000  |
| 6                  | 5.535712000  | 0.482693000  | 2.610481000  |
| 1                  | 8.925439000  | -1.810143000 | 1.632752000  |
| 1                  | 6.890381000  | -0.962145000 | 3.402229000  |
| 1                  | 4.908565000  | 0.523436000  | 3.492103000  |
| 1                  | 5.800723000  | 2.049559000  | -0.500662000 |
| 1                  | 4.095241000  | 0.748119000  | 1.040946000  |
| 1                  | 7.438512000  | -0.789520000 | -4.834213000 |
| 8                  | 4.651461000  | 3.580809000  | 1.075805000  |
| 7                  | 4.551720000  | 2.645933000  | 1.867364000  |
| 8                  | 3.988298000  | 2.716299000  | 2.959602000  |

| <sup>4</sup> TS5A: |              |              |              |
|--------------------|--------------|--------------|--------------|
| 26                 | 1.609030000  | -0.106066000 | -0.175240000 |
| 7                  | 2.388667000  | -0.666733000 | -1.960769000 |
| 7                  | 1.739733000  | 1.835567000  | -0.746535000 |
| 7                  | 1.351633000  | -2.051295000 | 0.329309000  |
| 7                  | 0.666931000  | 0.447090000  | 1.527758000  |
| 6                  | 2.606724000  | -1.949201000 | -2.384234000 |
| 6                  | 1.329399000  | 2.921013000  | -0.025566000 |
| 6                  | 2.871130000  | 0.159290000  | -2.939231000 |
| 6                  | 2.310560000  | 2.321269000  | -1.890291000 |
| 6                  | 1.712764000  | -3.139953000 | -0.415299000 |
| 6                  | 0.412873000  | 1.728024000  | 1.931208000  |
| 6                  | 0.827220000  | -2.532230000 | 1.495633000  |
| 6                  | 0.239131000  | -0.373245000 | 2.533403000  |
| 6                  | 3.238857000  | -1.937610000 | -3.682683000 |
| 6                  | 1.642618000  | 4.138666000  | -0.741836000 |
| 6                  | 3.405242000  | -0.626208000 | -4.027981000 |
| 6                  | 2.252504000  | 3.767420000  | -1.897652000 |
| 6                  | 1.407601000  | -4.355403000 | 0.306539000  |
| 6                  | -0.207627000 | 1.719258000  | 3.237547000  |
| 6                  | 0.860290000  | -3.977978000 | 1.494033000  |
| 6                  | -0.314769000 | 0.415955000  | 3.611856000  |
| 1                  | 3.503096000  | -2.822836000 | -4.249022000 |
| 1                  | 1.430838000  | 5.136189000  | -0.378247000 |
| 1                  | 3.835150000  | -0.215484000 | -4.934011000 |
| 1                  | 2.643811000  | 4.394438000  | -2.689171000 |
| 1                  | 1.594848000  | -5.355766000 | -0.064854000 |
| 1                  | -0.505039000 | 2.607023000  | 3.781777000  |
| 1                  | 0.501815000  | -4.603089000 | -2.303016000 |
| 1                  | -0.723991000 | 0.006201000  | 4.527391000  |
| 6                  | 2.292092000  | -3.104141000 | -1.676271000 |
| 6                  | 0.710006000  | 2.880909000  | 1.216338000  |
| 6                  | 0.311904000  | -1.760616000 | 2.530515000  |
| 6                  | 2.846101000  | 1.551172000  | -2.914030000 |
| 1                  | 2.523632000  | -4.055497000 | -2.146927000 |
| 1                  | 0.455481000  | 3.830806000  | 1.676053000  |
| 1                  | -0.074647000 | -2.283827000 | 3.400398000  |
| 1                  | 3.267341000  | 2.074314000  | -3.767506000 |
| 8                  | 3.126878000  | -0.036826000 | 0.566203000  |
| 16                 | -0.614373000 | -0.153607000 | -1.186324000 |
| 1                  | -0.242129000 | 0.227234000  | -2.429930000 |
| 6                  | 7.012006000  | 0.391583000  | -3.020862000 |
| 6                  | 7.298403000  | 0.952504000  | -4.426232000 |
| 7                  | 6.773109000  | -1.058138000 | -3.130358000 |
| 8                  | 7.523180000  | -0.006884000 | -5.340754000 |
| 8                  | 7.355474000  | 2.136558000  | -4.676831000 |
| 1                  | 6.143431000  | 0.925753000  | -2.620004000 |
| 1                  | 5.771063000  | -1.241434000 | -3.196999000 |
| 1                  | 7.102577000  | -1.519648000 | -2.282690000 |
| 6                  | 8.239015000  | 0.692597000  | -2.115799000 |
| 6                  | 8.124250000  | 0.098201000  | -0.743993000 |
| 1                  | 8.347123000  | 1.782934000  | -2.080888000 |
| 1                  | 9.139231000  | 0.299849000  | -2.608206000 |
| 6                  | 8.908696000  | -0.914358000 | -0.235899000 |
| 7                  | 8.492402000  | -1.230121000 | 1.043476000  |
| 6                  | 7.407062000  | -0.443903000 | 1.376005000  |
| 6                  | 7.143313000  | 0.417228000  | 0.277189000  |
| 1                  | 9.748069000  | -1.426937000 | -0.687319000 |
| 6                  | 6.651462000  | -0.395211000 | 2.578866000  |
| 6                  | 6.102976000  | 1.346550000  | 0.347925000  |
| 6                  | 5.184472000  | 1.283204000  | 1.493496000  |
| 6                  | 5.603251000  | 0.472555000  | 2.654469000  |
| 1                  | 8.873988000  | -1.966620000 | -1.614914000 |
| 1                  | 6.910163000  | -1.029287000 | 3.424470000  |
| 1                  | 5.001914000  | 0.553039000  | 3.551306000  |
| 1                  | 5.882147000  | 2.044330000  | -0.448958000 |
| 1                  | 4.117513000  | 0.683554000  | 1.040464000  |
| 1                  | 7.391049000  | -0.848968000 | -4.817713000 |
| 8                  | 4.529597000  | 3.473564000  | 1.011368000  |
| 7                  | 4.552218000  | 2.576865000  | 1.863776000  |
| 8                  | 3.997387000  | 2.661490000  | 2.969111000  |

| <sup>2</sup> Int5A: |              |              |              |
|---------------------|--------------|--------------|--------------|
| 26                  | 1.374842000  | -0.553541000 | -1.042298000 |
| 7                   | 1.326712000  | -1.097535000 | -2.982561000 |
| 7                   | 0.385737000  | 1.171773000  | -1.453939000 |
| 7                   | 2.383215000  | -2.252957000 | -0.616524000 |
| 7                   | 1.435682000  | 0.011772000  | 0.916264000  |
| 6                   | 1.880632000  | -2.209073000 | -3.551191000 |
| 6                   | 0.025809000  | 2.168255000  | -0.584978000 |
| 6                   | 0.742557000  | -0.391469000 | -3.995667000 |
| 6                   | -0.082018000 | 1.544065000  | -2.684796000 |
| 6                   | 2.793253000  | -3.218679000 | -1.492149000 |
| 6                   | 0.967960000  | 1.172531000  | 1.469840000  |
| 6                   | 2.786144000  | -2.660947000 | 0.625148000  |
| 6                   | 1.983424000  | -0.716447000 | 1.936657000  |
| 6                   | 1.635444000  | -2.213320000 | -4.978708000 |
| 6                   | -0.691073000 | 3.208165000  | -1.290375000 |
| 6                   | 0.925834000  | -1.086297000 | -5.254159000 |
| 6                   | -0.760979000 | 2.818831000  | -2.593095000 |
| 6                   | 3.482746000  | -4.276890000 | -0.783411000 |
| 6                   | 1.241901000  | 1.191139000  | 2.889113000  |
| 6                   | 3.475005000  | -3.932265000 | 0.532446000  |
| 6                   | 1.868869000  | 0.012877000  | 3.181470000  |
| 1                   | 1.972972000  | -2.983875000 | -5.661114000 |
| 1                   | -1.085062000 | 4.107323000  | -0.831985000 |
| 1                   | 0.558236000  | -0.736353000 | -6.211263000 |
| 1                   | -1.222614000 | 3.333609000  | -3.427144000 |
| 1                   | 3.909619000  | -5.156733000 | -1.249330000 |
| 1                   | 0.963917000  | 1.992827000  | 3.563117000  |
| 1                   | 3.896562000  | -4.468743000 | 1.373838000  |
| 1                   | 2.207911000  | -0.350367000 | 4.144747000  |
| 6                   | 2.568933000  | -3.203660000 | -2.865431000 |
| 6                   | 0.307790000  | 2.184790000  | 0.777092000  |
| 6                   | 2.599671000  | -1.958967000 | 1.811053000  |
| 6                   | 0.080710000  | 0.824815000  | -3.865007000 |
| 1                   | 2.955018000  | -4.037141000 | -3.445408000 |
| 1                   | -0.025231000 | 3.047503000  | 1.347430000  |
| 1                   | 2.986753000  | -2.412227000 | 2.719513000  |
| 1                   | -0.339126000 | 1.257930000  | -4.768835000 |
| 8                   | 3.024029000  | 0.319814000  | -1.349148000 |
| 16                  | -0.689450000 | -1.602403000 | -0.683501000 |
| 1                   | -0.372261000 | -2.829954000 | -1.156457000 |
| 6                   | 6.905546000  | 0.776038000  | -2.039385000 |
| 6                   | 7.607109000  | 0.141529000  | -3.267891000 |
| 7                   | 5.581032000  | 1.262467000  | -2.457887000 |
| 8                   | 6.945775000  | 0.351390000  | -4.410802000 |
| 8                   | 8.660178000  | -0.457800000 | -3.200508000 |
| 1                   | 7.522268000  | 1.645305000  | -1.773909000 |
| 1                   | 5.396627000  | 2.187613000  | -2.082060000 |
| 1                   | 4.792775000  | 0.670269000  | -2.150266000 |
| 6                   | 6.924127000  | -0.209248000 | -0.847644000 |
| 6                   | 6.447657000  | 0.379266000  | 0.450592000  |
| 1                   | 7.947235000  | -0.587798000 | -0.754629000 |
| 1                   | 6.296930000  | -1.070928000 | -1.109474000 |
| 6                   | 5.134501000  | 0.495368000  | 0.834405000  |
| 7                   | 5.056983000  | 1.090707000  | 2.082855000  |
| 6                   | 6.316264000  | 1.362750000  | 2.542351000  |
| 6                   | 7.234320000  | 0.932728000  | 1.527417000  |
| 1                   | 4.238469000  | 0.231005000  | 0.275396000  |
| 6                   | 6.746079000  | 1.939830000  | 3.745411000  |
| 6                   | 8.604939000  | 1.100383000  | 1.746117000  |
| 6                   | 9.013200000  | 1.679689000  | 2.946950000  |
| 6                   | 8.107777000  | 2.098892000  | 3.944274000  |
| 1                   | 4.188894000  | 1.212165000  | 2.589798000  |
| 1                   | 6.034219000  | 2.256939000  | 4.502725000  |
| 1                   | 8.498682000  | 2.539883000  | 4.851873000  |
| 1                   | 9.348601000  | 0.794939000  | 1.019484000  |
| 1                   | 2.801711000  | 1.253716000  | -1.195792000 |
| 1                   | 6.126813000  | 0.846160000  | -4.102546000 |
| 8                   | 11.233831000 | 1.499082000  | 2.314455000  |
| 7                   | 10.439619000 | 1.862336000  | 3.187807000  |
| 8                   | 10.789731000 | 2.374291000  | 4.258375000  |

| <sup>4</sup> Int5A: |              |              |              |
|---------------------|--------------|--------------|--------------|
| 26                  | 1.436713000  | -0.617310000 | -1.053266000 |
| 7                   | 1.208319000  | -1.156235000 | -2.949351000 |
| 7                   | 0.436015000  | 1.267443000  | -1.477111000 |
| 7                   | 2.484442000  | -2.434033000 | -0.639721000 |
| 7                   | 1.533439000  | -0.112190000 | 0.878759000  |
| 6                   | 1.703532000  | -2.302789000 | -3.520223000 |
| 6                   | 0.095533000  | 2.211810000  | -0.563552000 |
| 6                   | 0.619147000  | -0.412437000 | -3.943150000 |
| 6                   | -0.091918000 | 1.630599000  | -2.672033000 |
| 6                   | 2.769694000  | -3.405652000 | -1.537812000 |
| 6                   | 1.083891000  | 1.061257000  | 1.435598000  |
| 6                   | 2.924665000  | -2.844216000 | 0.574915000  |
| 6                   | 2.126468000  | -0.852900000 | 1.871868000  |
| 6                   | 1.394962000  | -2.293648000 | -4.933643000 |
| 6                   | -0.669109000 | 3.263489000  | -1.217229000 |
| 6                   | 0.727212000  | -1.133527000 | -5.193124000 |
| 6                   | -0.786497000 | 2.901576000  | -2.528601000 |
| 6                   | 3.456606000  | -4.502088000 | -0.867284000 |
| 6                   | 1.405319000  | 1.061249000  | 2.845186000  |
| 6                   | 3.552394000  | -4.152837000 | 0.447425000  |
| 6                   | 2.044153000  | -0.119589000 | 3.114574000  |
| 1                   | 1.669642000  | -3.078303000 | -5.628259000 |
| 1                   | -1.070670000 | 4.145251000  | -0.731284000 |
| 1                   | 0.345825000  | -0.778532000 | -6.143073000 |
| 1                   | -1.302074000 | 3.430624000  | -3.321800000 |
| 1                   | 3.807342000  | -5.410129000 | -1.343588000 |
| 1                   | 1.149956000  | 1.856486000  | 3.535947000  |
| 1                   | 3.997062000  | -4.718982000 | -1.257460000 |
| 1                   | 2.418818000  | -0.476185000 | 4.066951000  |
| 6                   | 2.409345000  | -3.334790000 | -2.887427000 |
| 6                   | 0.423891000  | 2.120295000  | 0.791946000  |
| 6                   | 2.758379000  | -2.099834000 | 1.745163000  |
| 6                   | 0.014206000  | 0.846822000  | -3.826568000 |
| 1                   | 2.701465000  | -4.167518000 | -3.522257000 |
| 1                   | 0.122984000  | 2.946961000  | 1.431041000  |
| 1                   | 3.160293000  | -2.522160000 | 2.662648000  |
| 1                   | -0.422176000 | 1.247461000  | -4.738274000 |
| 8                   | 3.087027000  | 0.266777000  | -1.443878000 |
| 16                  | -0.696909000 | -1.633979000 | -0.483327000 |
| 1                   | -1.019919000 | -2.069367000 | -1.722109000 |
| 6                   | 6.999624000  | 0.793502000  | -2.015519000 |
| 6                   | 7.730568000  | 0.125767000  | -3.207126000 |
| 7                   | 5.677747000  | 1.251049000  | -2.473777000 |
| 8                   | 7.106589000  | 0.317336000  | -4.375245000 |
| 8                   | 8.775826000  | -0.479909000 | -3.096686000 |
| 1                   | 7.599390000  | 1.681231000  | -1.772666000 |
| 1                   | 5.455925000  | 2.161109000  | -2.080818000 |
| 1                   | 4.903811000  | 0.630739000  | -2.189252000 |
| 6                   | 7.003617000  | -0.142873000 | -0.785752000 |
| 6                   | 6.476454000  | 0.491053000  | 0.471216000  |
| 1                   | 8.030156000  | -0.496410000 | -0.645538000 |
| 1                   | 6.401860000  | -1.027634000 | -1.030587000 |
| 6                   | 5.149258000  | 0.645688000  | 0.790144000  |
| 7                   | 5.029079000  | 1.273475000  | 2.019255000  |
| 6                   | 6.271569000  | 1.527588000  | 2.530955000  |
| 6                   | 7.225066000  | 1.054877000  | 1.569557000  |
| 1                   | 4.270073000  | 0.384104000  | 0.203000000  |
| 6                   | 6.658416000  | 2.124692000  | 3.738894000  |
| 6                   | 8.587573000  | 1.201394000  | 1.846196000  |
| 6                   | 8.953220000  | 1.802084000  | 3.050242000  |
| 6                   | 8.012640000  | 2.262403000  | 3.995637000  |
| 1                   | 4.143619000  | 1.396800000  | 2.495026000  |
| 1                   | 5.919704000  | 2.474093000  | 4.455161000  |
| 1                   | 8.371333000  | 2.717923000  | 4.909328000  |
| 1                   | 9.356986000  | 0.863725000  | 1.161887000  |
| 1                   | 2.771172000  | 1.168143000  | -1.629026000 |
| 1                   | 6.281862000  | 0.821574000  | -4.106330000 |
| 8                   | 11.195882000 | 1.563754000  | 2.523423000  |
| 7                   | 10.370728000 | 1.964104000  | 3.350716000  |
| 8                   | 10.682748000 | 2.496888000  | 4.422889000  |

## Large model structures:

### <sup>4</sup>FeOO+NO:

|    |              |               |              |
|----|--------------|---------------|--------------|
| 26 | -2.580902000 | -4.949569000  | -4.292668000 |
| 7  | -2.915750000 | -4.448410000  | -2.360324000 |
| 7  | -2.236514000 | -6.866019000  | -3.785016000 |
| 7  | -2.169814000 | -5.421045000  | -6.217587000 |
| 7  | -2.831274000 | -3.003484000  | -4.793787000 |
| 6  | -3.284906000 | -3.229964000  | -1.852818000 |
| 6  | -3.550501000 | -3.332031000  | -0.423323000 |
| 6  | -3.306752000 | -4.633836000  | -0.098643000 |
| 6  | -2.918617000 | -5.318947000  | -1.307932000 |
| 6  | -2.304358000 | -7.383645000  | -2.521249000 |
| 6  | -1.998963000 | -8.797765000  | -2.544941000 |
| 6  | -1.744057000 | -9.121579000  | -3.841308000 |
| 6  | -1.893151000 | -7.904429000  | -4.608035000 |
| 6  | -1.843510000 | -6.648153000  | -6.726567000 |
| 6  | -1.643782000 | -6.560981000  | -8.155755000 |
| 6  | -1.847714000 | -5.259920000  | -8.498142000 |
| 6  | -2.172819000 | -4.554873000  | -7.277658000 |
| 6  | -2.742054000 | -2.480899000  | -6.056314000 |
| 6  | -3.021612000 | -1.062886000  | -6.027422000 |
| 6  | -3.294484000 | -0.745101000  | -4.727117000 |
| 6  | -3.174616000 | -1.967914000  | -3.968524000 |
| 6  | -3.398134000 | -2.064228000  | -2.597708000 |
| 6  | -2.626778000 | -6.676362000  | -1.370498000 |
| 6  | -1.715676000 | -7.815778000  | -5.982972000 |
| 6  | -2.435594000 | -3.192611000  | -7.211680000 |
| 1  | -3.683546000 | -1.152650000  | -2.081218000 |
| 1  | -2.655313000 | -7.232595000  | -0.437764000 |
| 1  | -1.446750000 | -8.723966000  | -6.514767000 |
| 1  | -2.399256000 | -2.634279000  | -8.142994000 |
| 1  | -3.403286000 | -5.103887000  | 0.873553000  |
| 1  | -1.981178000 | -9.438688000  | -1.671751000 |
| 1  | -1.471686000 | -10.083672000 | -4.258086000 |
| 1  | -1.374233000 | -7.394281000  | -8.793284000 |
| 1  | -1.781449000 | -4.800143000  | -9.476805000 |
| 1  | -3.024913000 | -0.414164000  | -6.895394000 |
| 1  | -3.538767000 | 0.221268000   | -4.304032000 |
| 6  | -4.039237000 | -2.244687000  | 0.491160000  |
| 6  | -2.935922000 | -1.293790000  | 1.031453000  |
| 6  | -3.509864000 | -0.388154000  | 2.115340000  |
| 8  | -3.605458000 | 0.883781000   | 1.872141000  |
| 8  | -3.891060000 | -0.912362000  | 3.185195000  |
| 1  | -4.524629000 | -2.705236000  | 1.358548000  |
| 1  | -4.804807000 | -1.641605000  | -0.016275000 |
| 1  | -2.139712000 | -1.899940000  | 1.476330000  |
| 1  | -2.504974000 | -0.698435000  | 0.221480000  |
| 16 | -4.857891000 | -5.341889000  | -4.595605000 |
| 1  | -4.755094000 | -6.488344000  | -5.307032000 |
| 6  | 5.535536000  | 0.430375000   | 2.556962000  |
| 6  | 5.607967000  | 0.961923000   | 3.991018000  |
| 8  | 5.116293000  | 0.340178000   | 4.928809000  |
| 6  | 4.099958000  | 0.096279000   | 2.103464000  |
| 6  | 3.243187000  | 1.186764000   | 1.461257000  |
| 8  | 2.033387000  | 0.959690000   | 1.276952000  |
| 7  | 3.832994000  | 2.308374000   | 1.019988000  |
| 7  | 6.274190000  | 2.142512000   | 4.169897000  |
| 6  | 6.517979000  | 2.650239000   | 5.508113000  |
| 6  | 5.294770000  | 3.208242000   | 6.254171000  |
| 8  | 5.316173000  | 3.378412000   | 7.472411000  |
| 7  | 4.263293000  | 3.524426000   | 5.447632000  |
| 6  | 2.930389000  | 3.855538000   | 5.886744000  |
| 6  | 2.060302000  | 3.700842000   | 4.622633000  |
| 8  | 2.553879000  | 3.352147000   | 3.553064000  |
| 6  | 2.835288000  | 5.238639000   | 6.594150000  |
| 6  | 3.399130000  | 6.397376000   | 5.804037000  |
| 6  | 4.760630000  | 6.719278000   | 5.908880000  |
| 6  | 2.590861000  | 7.161198000   | 4.951811000  |
| 6  | 5.301952000  | 7.772837000   | 5.171078000  |
| 6  | 3.128781000  | 8.216051000   | 4.211547000  |
| 6  | 4.487043000  | 8.522070000   | 4.318167000  |
| 7  | 0.725785000  | 3.903489000   | 4.766218000  |
| 6  | -0.137029000 | 3.938236000   | 3.599107000  |
| 6  | -1.203081000 | 5.012028000   | 3.879431000  |

|   |              |              |              |
|---|--------------|--------------|--------------|
| 8 | -1.219270000 | 5.639384000  | 4.943266000  |
| 6 | -0.699704000 | 2.523152000  | 3.279068000  |
| 8 | -1.434271000 | 2.620447000  | 2.038590000  |
| 6 | -1.558485000 | 1.956354000  | 4.405121000  |
| 7 | -2.078118000 | 5.244568000  | 2.871885000  |
| 6 | -2.936242000 | 6.406141000  | 2.865427000  |
| 6 | -4.384006000 | 6.022466000  | 3.158446000  |
| 8 | -4.889484000 | 4.958904000  | 2.758035000  |
| 6 | -2.858071000 | 7.155845000  | 1.493483000  |
| 6 | -1.496590000 | 7.680479000  | 1.182158000  |
| 6 | -0.558815000 | 7.058979000  | 0.379816000  |
| 6 | -0.873436000 | 8.879087000  | 1.676926000  |
| 7 | 0.597984000  | 7.784142000  | 0.336729000  |
| 6 | 0.444719000  | 8.899554000  | 1.125442000  |
| 6 | -1.278595000 | 9.942923000  | 2.503555000  |
| 6 | 1.341489000  | 9.941941000  | 1.390509000  |
| 6 | -0.389251000 | 10.979767000 | 2.764679000  |
| 6 | 0.910430000  | 10.977886000 | 2.214489000  |
| 7 | -5.123959000 | 6.943465000  | 3.817460000  |
| 6 | -6.543032000 | 6.764239000  | 4.094107000  |
| 6 | -6.826537000 | 6.289337000  | 5.533819000  |
| 6 | -6.258141000 | 4.905961000  | 5.897131000  |
| 6 | -7.030070000 | 3.749087000  | 5.243382000  |
| 7 | -6.487262000 | 2.422856000  | 5.530612000  |
| 6 | -5.653896000 | 1.722091000  | 4.718218000  |
| 7 | -5.167416000 | 2.263385000  | 3.604903000  |
| 7 | -5.333019000 | 0.462329000  | 5.033085000  |
| 1 | 3.538586000  | -0.293613000 | 2.958013000  |
| 1 | 4.124006000  | -0.715770000 | 1.365911000  |
| 1 | 4.773460000  | 2.536149000  | 1.307911000  |
| 1 | 3.244615000  | 3.115760000  | 0.742282000  |
| 1 | 6.059341000  | 1.086612000  | 1.853626000  |
| 1 | 6.103220000  | -0.508196000 | 2.575841000  |
| 1 | 6.651998000  | 2.650746000  | 3.372189000  |
| 1 | 6.919872000  | 1.858997000  | 6.148473000  |
| 1 | 7.269327000  | 3.443869000  | 5.440851000  |
| 1 | 4.319837000  | 3.278764000  | 4.464278000  |
| 1 | 2.587582000  | 3.105253000  | 6.615433000  |
| 1 | 3.385651000  | 5.124657000  | 7.532580000  |
| 1 | 1.786986000  | 5.430106000  | 6.858291000  |
| 1 | 5.389438000  | 6.141369000  | 6.581682000  |
| 1 | 1.529962000  | 6.934299000  | 4.868131000  |
| 1 | 6.358214000  | 8.013771000  | 5.268915000  |
| 1 | 2.487412000  | 8.796498000  | 3.555659000  |
| 1 | 4.905524000  | 9.345200000  | 3.744111000  |
| 1 | 0.370200000  | 4.435699000  | 5.554207000  |
| 1 | 0.456569000  | 4.255304000  | 2.731038000  |
| 1 | 0.174409000  | 1.881724000  | 3.115346000  |
| 1 | -0.975260000 | 1.914276000  | 5.329883000  |
| 1 | -1.895518000 | 0.941592000  | 4.172304000  |
| 1 | -2.442832000 | 2.581365000  | 4.577065000  |
| 1 | -2.156787000 | 1.944030000  | 2.017291000  |
| 1 | -2.045905000 | 4.621778000  | 2.070619000  |
| 1 | -2.568549000 | 7.065395000  | 3.657101000  |
| 1 | -3.602309000 | 7.963827000  | 1.516813000  |
| 1 | -3.177413000 | 6.454073000  | 0.715031000  |
| 1 | -0.669743000 | 6.159472000  | -0.212175000 |
| 1 | -2.280001000 | 9.963987000  | 2.932338000  |
| 1 | -0.696510000 | 11.806044000 | 3.401492000  |
| 1 | 2.338668000  | 9.930732000  | 0.959403000  |
| 1 | 1.584092000  | 11.802056000 | 2.435788000  |
| 1 | 1.512262000  | 7.420302000  | -0.025201000 |
| 1 | -4.662145000 | 7.776822000  | 4.157507000  |
| 1 | -6.926149000 | 6.057459000  | 3.356504000  |
| 1 | -7.049543000 | 7.721231000  | 3.924613000  |
| 1 | -6.416441000 | 7.032037000  | 6.229820000  |
| 1 | -7.915423000 | 6.298615000  | 5.686669000  |
| 1 | -6.295157000 | 4.781397000  | 6.987243000  |
| 1 | -5.199943000 | 4.849423000  | 5.618203000  |
| 1 | -8.072911000 | 3.758432000  | 5.583723000  |
| 1 | -7.052929000 | 3.861684000  | 4.157245000  |
| 1 | -6.648288000 | 2.038586000  | 6.450997000  |
| 1 | -5.084905000 | 3.273932000  | 3.493935000  |
| 1 | -4.539337000 | 1.683703000  | 2.988523000  |
| 1 | -5.931196000 | -0.057085000 | 5.660091000  |



|   |              |              |               |                                |              |              |              |
|---|--------------|--------------|---------------|--------------------------------|--------------|--------------|--------------|
| 1 | -4.733653000 | -0.084844000 | 4.358077000   | 6                              | -1.419716000 | 3.458336000  | -1.594363000 |
| 6 | -7.148024000 | 7.828233000  | -0.284893000  | 8                              | -1.882508000 | 4.626533000  | -1.747389000 |
| 6 | -5.938338000 | 6.891796000  | -0.182028000  | 6                              | 0.971411000  | 3.110263000  | -2.483521000 |
| 6 | -6.044480000 | 5.647975000  | -1.079064000  | 6                              | 0.805950000  | 1.787183000  | -3.178875000 |
| 7 | -4.982889000 | 4.657066000  | -0.846830000  | 6                              | -0.148899000 | 1.455296000  | -4.114917000 |
| 6 | -5.159153000 | 3.501279000  | -0.191360000  | 6                              | 1.539215000  | 0.568390000  | -2.908499000 |
| 7 | -4.364518000 | 2.463309000  | -0.380159000  | 7                              | -0.051032000 | 0.124605000  | -4.448040000 |
| 7 | -6.235532000 | 3.393111000  | 0.658415000   | 6                              | 0.953428000  | -0.458289000 | -3.701689000 |
| 1 | -7.013977000 | 8.708367000  | 0.353623000   | 6                              | 2.627639000  | 0.236509000  | -2.076550000 |
| 1 | -8.073857000 | 7.325304000  | 0.022858000   | 6                              | 1.376819000  | -1.790437000 | -3.651676000 |
| 1 | -5.817562000 | 6.568148000  | 0.857407000   | 6                              | 3.064061000  | -1.084036000 | -2.037704000 |
| 1 | -5.026637000 | 7.439974000  | -0.443358000  | 6                              | 2.436099000  | -2.089419000 | -2.803442000 |
| 1 | -7.002730000 | 5.142727000  | -0.922482000  | 8                              | -2.065229000 | 2.378139000  | -1.705861000 |
| 1 | -5.995310000 | 5.929751000  | -2.135067000  | 1                              | 0.739679000  | 3.947219000  | -3.153159000 |
| 1 | -4.099721000 | 4.754192000  | -1.352350000  | 1                              | 2.005834000  | 3.259200000  | -2.153328000 |
| 1 | -4.244793000 | 1.766715000  | 0.365250000   | 1                              | -0.899073000 | 2.074653000  | -4.587635000 |
| 1 | -3.576331000 | 2.495448000  | -1.069069000  | 1                              | 3.118019000  | 0.996190000  | -1.473135000 |
| 1 | -6.280798000 | 2.503222000  | 1.141764000   | 1                              | 3.899617000  | -1.351002000 | -1.394102000 |
| 1 | -6.304626000 | 4.172970000  | 1.305030000   | 1                              | 0.887999000  | -2.568062000 | -4.230300000 |
| 1 | -7.293091000 | 8.185037000  | -1.311627000  | 1                              | 2.764772000  | -3.122236000 | -2.803442000 |
| 6 | -8.555019000 | 2.165242000  | -3.902891000  | 1                              | 0.453998000  | 4.150131000  | -0.663286000 |
| 6 | -7.788940000 | 2.496889000  | -5.197969000  | 1                              | -0.470127000 | 2.230331000  | 0.489190000  |
| 6 | -6.561030000 | 3.342117000  | -4.933895000  | 1                              | -0.192703000 | 1.287285000  | -0.863021000 |
| 6 | -5.412362000 | 2.769899000  | -4.370127000  | 1                              | 1.085563000  | 1.859687000  | 0.072243000  |
| 6 | -6.547390000 | 4.723915000  | -5.164013000  | 1                              | -0.750317000 | -0.380120000 | -4.979032000 |
| 6 | -4.309348000 | 3.538717000  | -4.005201000  | 7                              | 2.150856000  | -5.307739000 | -4.110335000 |
| 6 | -5.453667000 | 5.513664000  | -4.805772000  | 8                              | 0.011035000  | -5.040772000 | -3.137936000 |
| 6 | -4.335656000 | 4.931477000  | -4.189726000  | 8                              | 1.941750000  | -4.992600000 | -5.219413000 |
| 8 | -3.336753000 | 5.752648000  | -3.775012000  |                                |              |              |              |
| 1 | -8.458401000 | 3.020299000  | -5.892960000  |                                |              |              |              |
| 1 | -7.501644000 | 1.558221000  | -5.690009000  | <sup>4</sup> Re <sub>B</sub> : |              |              |              |
| 1 | -5.381804000 | 1.695017000  | -4.202307000  | 26                             | -1.555555000 | -4.511456000 | -4.281126000 |
| 1 | -7.414658000 | 5.197475000  | -5.6221534000 | 7                              | -2.287204000 | -4.191792000 | -2.417039000 |
| 1 | -3.445014000 | 3.067415000  | -3.545825000  | 7                              | -1.031406000 | -6.392200000 | -3.759780000 |
| 1 | -5.454158000 | 6.586628000  | -4.977856000  | 7                              | -0.771690000 | -4.809759000 | -6.124301000 |
| 1 | -2.712067000 | 5.272011000  | -3.176214000  | 7                              | -1.951417000 | -2.586414000 | -4.760341000 |
| 1 | -7.918439000 | 1.610864000  | -3.204488000  | 6                              | -2.840609000 | -3.034708000 | -1.933344000 |
| 1 | -9.440969000 | 1.552430000  | -4.110536000  | 6                              | -3.256878000 | -3.216369000 | -0.551375000 |
| 1 | -8.883257000 | 3.082309000  | -3.398821000  | 6                              | -2.928605000 | -4.502371000 | -0.231493000 |
| 6 | 6.994001000  | 5.915234000  | 1.497102000   | 6                              | -2.324141000 | -5.099219000 | -1.394416000 |
| 6 | 7.489265000  | 4.527484000  | 1.127953000   | 6                              | -1.256784000 | -6.998727000 | -2.552917000 |
| 8 | 7.257180000  | 3.516312000  | 1.806424000   | 6                              | -0.797489000 | -8.367241000 | -2.593438000 |
| 6 | 5.751297000  | 6.353185000  | 0.680525000   | 6                              | -0.300035000 | -8.577941000 | -3.842709000 |
| 6 | 4.670011000  | 5.278646000  | 0.700792000   | 6                              | -0.454018000 | -7.337946000 | -4.566791000 |
| 6 | 3.270995000  | 5.663387000  | 0.180200000   | 6                              | -0.210581000 | -5.964405000 | -6.600781000 |
| 8 | 3.086257000  | 6.854734000  | -0.180637000  | 6                              | 0.234839000  | -5.772850000 | -7.959447000 |
| 8 | 2.421060000  | 4.720107000  | 0.190247000   | 6                              | -0.055273000 | -4.482687000 | -8.289940000 |
| 7 | 8.195714000  | 4.445020000  | -0.025147000  | 6                              | -0.679162000 | -3.887013000 | -7.133605000 |
| 6 | 8.662921000  | 3.181251000  | -0.572884000  | 6                              | -1.701445000 | -1.970625000 | -5.959253000 |
| 6 | 8.748424000  | 3.219938000  | -2.109124000  | 6                              | -2.152660000 | -0.600428000 | -5.913094000 |
| 6 | 7.402328000  | 3.359449000  | -2.788991000  | 6                              | -2.678967000 | -0.403176000 | -4.671926000 |
| 6 | 6.552161000  | 2.250132000  | -2.898730000  | 6                              | -2.550915000 | -1.653150000 | -3.960503000 |
| 6 | 6.959539000  | 4.591844000  | -3.286163000  | 6                              | -2.972163000 | -1.852117000 | -2.649665000 |
| 6 | 5.290004000  | 2.367525000  | -3.479615000  | 6                              | -1.854229000 | -6.406123000 | -1.448869000 |
| 6 | 5.693178000  | 4.718479000  | -3.863036000  | 6                              | -0.068774000 | -7.149072000 | -5.886395000 |
| 6 | 4.855486000  | 3.606539000  | -3.958058000  | 6                              | -1.112872000 | -2.567799000 | -7.066744000 |
| 1 | 5.361516000  | 7.283710000  | 1.104633000   | 1                              | -3.428949000 | -1.002798000 | -2.151874000 |
| 1 | 6.033019000  | 6.580375000  | -0.355948000  | 1                              | -1.960709000 | -7.011546000 | -0.553724000 |
| 1 | 4.525319000  | 4.820546000  | 1.729236000   | 1                              | 0.390534000  | -7.989375000 | -6.398370000 |
| 1 | 5.007981000  | 4.415730000  | 0.114692000   | 1                              | -0.975595000 | -1.952294000 | -7.950894000 |
| 1 | 6.736104000  | 5.887187000  | 2.560297000   | 1                              | -3.081787000 | -5.008994000 | 0.714492000  |
| 1 | 9.239107000  | 2.292451000  | -2.430290000  | 1                              | -0.853586000 | -9.060238000 | -1.763014000 |
| 1 | 9.414659000  | 4.039904000  | -2.413191000  | 1                              | 0.138499000  | -9.479525000 | -4.252252000 |
| 1 | 6.881959000  | 1.282367000  | -2.525527000  | 1                              | 0.714960000  | -6.532748000 | -8.563689000 |
| 1 | 7.613561000  | 5.460947000  | -3.229429000  | 1                              | 0.136953000  | -3.965310000 | -9.221916000 |
| 1 | 4.642499000  | 1.498573000  | -3.548736000  | 1                              | -2.063871000 | 0.108272000  | -6.727053000 |
| 1 | 5.361608000  | 5.684995000  | -4.232823000  | 1                              | -3.095063000 | 0.500687000  | -4.250527000 |
| 1 | 3.866900000  | 3.697479000  | -4.398285000  | 6                              | -3.895601000 | -2.194460000 | 0.344092000  |
| 1 | 7.972231000  | 2.400698000  | -0.244390000  | 6                              | -2.902153000 | -1.145646000 | 0.907505000  |
| 1 | 8.298967000  | 5.280352000  | -0.584517000  | 6                              | -3.559673000 | -0.287928000 | 1.982675000  |
| 1 | 9.650716000  | 2.935420000  | -0.156350000  | 8                              | -3.640498000 | 0.991911000  | 1.778411000  |
| 1 | 7.807291000  | 6.643374000  | 1.371612000   | 8                              | -3.999245000 | -0.849591000 | 3.008802000  |
| 8 | -0.634243000 | -4.560313000 | -4.155141000  | 1                              | -4.356826000 | -2.704037000 | 1.196540000  |
| 7 | 0.149186000  | 2.097520000  | -0.334573000  | 1                              | -4.702493000 | -1.670400000 | -0.186850000 |
| 6 | 0.069179000  | 3.301533000  | -1.231648000  | 1                              | -2.061469000 | -1.677682000 | 1.368161000  |
|   |              |              |               | 1                              | -2.505261000 | -0.512887000 | 0.108301000  |

|    |              |              |              |   |              |              |              |
|----|--------------|--------------|--------------|---|--------------|--------------|--------------|
| 16 | -3.882834000 | -5.241745000 | -5.016866000 | 1 | -1.004258000 | 1.900900000  | 5.295131000  |
| 1  | -3.687133000 | -4.999389000 | -6.334120000 | 1 | -1.871436000 | 0.915414000  | 4.108067000  |
| 6  | 5.802690000  | 0.405712000  | 2.507653000  | 1 | -2.460899000 | 2.543256000  | 4.500978000  |
| 6  | 5.754674000  | 0.930244000  | 3.944371000  | 1 | -2.122500000 | 1.978180000  | 1.969204000  |
| 8  | 5.271713000  | 0.266390000  | 4.856825000  | 1 | -2.041674000 | 4.564504000  | 2.066935000  |
| 6  | 4.434248000  | -0.057028000 | 1.975092000  | 1 | -2.573800000 | 7.056729000  | 3.566144000  |
| 6  | 3.442993000  | 0.996590000  | 1.487443000  | 1 | -3.603274000 | 7.864997000  | 1.394041000  |
| 8  | 2.250849000  | 0.672122000  | 1.333129000  | 1 | -3.233237000 | 6.307157000  | 0.665915000  |
| 7  | 3.909595000  | 2.209222000  | 1.157187000  | 1 | -0.676904000 | 5.914641000  | -0.265052000 |
| 7  | 6.311795000  | 2.163325000  | 4.156563000  | 1 | -2.269609000 | 9.888325000  | 2.690007000  |
| 6  | 6.517979000  | 2.650239000  | 5.508113000  | 1 | -0.660286000 | 11.726343000 | 3.082549000  |
| 6  | 5.286748000  | 3.195835000  | 6.244099000  | 1 | 2.355108000  | 9.698171000  | 0.737920000  |
| 8  | 5.308252000  | 3.385865000  | 7.459930000  | 1 | 1.623442000  | 11.645508000 | 2.127729000  |
| 7  | 4.248151000  | 3.483633000  | 5.436959000  | 1 | 1.503312000  | 7.174545000  | -0.135858000 |
| 6  | 2.921927000  | 3.828847000  | 5.885315000  | 1 | -4.642062000 | 7.743360000  | 4.162513000  |
| 6  | 2.039432000  | 3.665106000  | 4.633830000  | 1 | -6.940418000 | 6.075223000  | 3.347168000  |
| 8  | 2.514459000  | 3.277093000  | 3.570310000  | 1 | -7.033096000 | 7.732665000  | 3.943046000  |
| 6  | 2.842434000  | 5.221838000  | 6.575851000  | 1 | -6.390901000 | 6.992112000  | 6.232861000  |
| 6  | 3.385080000  | 6.373403000  | 5.760131000  | 1 | -7.913217000 | 6.308167000  | 5.689819000  |
| 6  | 4.747018000  | 6.702107000  | 5.833308000  | 1 | -6.336027000 | 4.724159000  | 6.953172000  |
| 6  | 2.556179000  | 7.127018000  | 4.918223000  | 1 | -5.236356000 | 4.790821000  | 5.587917000  |
| 6  | 5.268242000  | 7.751634000  | 5.075485000  | 1 | -8.137267000 | 3.775154000  | 5.525875000  |
| 6  | 3.073911000  | 8.177494000  | 4.157485000  | 1 | -7.109985000 | 3.876047000  | 4.104724000  |
| 6  | 4.432709000  | 8.490239000  | 4.233396000  | 1 | -6.799083000 | 1.984703000  | 6.353883000  |
| 7  | 0.709968000  | 3.902790000  | 4.776879000  | 1 | -5.119124000 | 3.301050000  | 3.498838000  |
| 6  | -0.137029000 | 3.938236000  | 3.599107000  | 1 | -4.557481000 | 1.729002000  | 2.957743000  |
| 6  | -1.216636000 | 5.000377000  | 3.868309000  | 1 | -6.094899000 | -0.100604000 | 5.500305000  |
| 8  | -1.232916000 | 5.654398000  | 4.915436000  | 1 | -4.854262000 | -0.093760000 | 4.243041000  |
| 6  | -0.676560000 | 2.520881000  | 3.256277000  | 6 | -7.148024000 | 7.828233000  | -0.284893000 |
| 8  | -1.369067000 | 2.615891000  | 1.991657000  | 6 | -5.940483000 | 6.888245000  | -0.257727000 |
| 6  | -1.560205000 | 1.935826000  | 4.353372000  | 6 | -6.133824000 | 5.611703000  | -1.088475000 |
| 7  | -2.104294000 | 5.193770000  | 2.862327000  | 7 | -4.982473000 | 4.702776000  | -1.015496000 |
| 6  | -2.953457000 | 6.361617000  | 2.811545000  | 6 | -4.973300000 | 3.538531000  | -0.352062000 |
| 6  | -4.403403000 | 6.004397000  | 3.127492000  | 7 | -4.063060000 | 2.604249000  | -0.556540000 |
| 8  | -4.931696000 | 4.954708000  | 2.718136000  | 7 | -5.978979000 | 3.296533000  | 0.555505000  |
| 6  | -2.880002000 | 7.038196000  | 1.401950000  | 1 | -6.956479000 | 8.725319000  | 0.314001000  |
| 6  | -1.512079000 | 7.516979000  | 1.049528000  | 1 | -8.047372000 | 7.342098000  | 0.115225000  |
| 6  | -0.579063000 | 6.846236000  | 0.278869000  | 1 | -5.722671000 | 6.603887000  | 0.776576000  |
| 6  | -0.875094000 | 8.730589000  | 1.486362000  | 1 | -5.054105000 | 7.416588000  | -0.627393000 |
| 7  | 0.583465000  | 7.557237000  | 0.201773000  | 1 | -7.021573000 | 5.061452000  | -0.761798000 |
| 6  | 0.442913000  | 8.708648000  | 0.937680000  | 1 | -6.277308000 | 5.858854000  | -2.144753000 |
| 6  | -1.267900000 | 9.834893000  | 2.264670000  | 1 | -4.222734000 | 4.885957000  | -1.677253000 |
| 6  | 1.355951000  | 9.746783000  | 1.161387000  | 1 | -3.927187000 | 1.890868000  | 0.169784000  |
| 6  | -0.363851000 | 10.868711000 | 2.483113000  | 1 | -3.303332000 | 2.631739000  | -1.269354000 |
| 6  | 0.937887000  | 10.823080000 | 1.938565000  | 1 | -5.865447000 | 2.416042000  | 1.045826000  |
| 7  | -5.121109000 | 6.925218000  | 3.809325000  | 1 | -6.118743000 | 4.061152000  | 1.208764000  |
| 6  | -6.543032000 | 6.764239000  | 4.094107000  | 1 | -7.378797000 | 8.156153000  | -1.305626000 |
| 6  | -6.826119000 | 6.272327000  | 5.528124000  | 6 | -8.555019000 | 2.165242000  | -3.902891000 |
| 6  | -6.293552000 | 4.868141000  | 5.865794000  | 6 | -7.771446000 | 2.392703000  | -5.212856000 |
| 6  | -7.094001000 | 3.743661000  | 5.189169000  | 6 | -6.485598000 | 3.147084000  | -4.956345000 |
| 7  | -6.592138000 | 2.396486000  | 5.454968000  | 6 | -5.325290000 | 2.471733000  | -4.554076000 |
| 6  | -5.734222000 | 1.711276000  | 4.655000000  | 6 | -6.445642000 | 4.547645000  | -4.983657000 |
| 7  | -5.181106000 | 2.288014000  | 3.595370000  | 6 | -4.196886000 | 3.155508000  | -4.102820000 |
| 7  | -5.451984000 | 0.431701000  | 4.931300000  | 6 | -5.325350000 | 5.250151000  | -4.540952000 |
| 1  | 3.926951000  | -0.643563000 | 2.746162000  | 6 | -4.215430000 | 4.555959000  | -4.035639000 |
| 1  | 4.585931000  | -0.725586000 | 1.118138000  | 8 | -3.253065000 | 5.280334000  | -3.400564000 |
| 1  | 4.848265000  | 2.476469000  | 1.410694000  | 1 | -8.402137000 | 2.946557000  | -5.920955000 |
| 1  | 3.265139000  | 2.987001000  | 0.933266000  | 1 | -7.556233000 | 1.421403000  | -5.675867000 |
| 1  | 6.296913000  | 1.114528000  | 1.833878000  | 1 | -5.312567000 | 1.383591000  | -4.562531000 |
| 1  | 6.454251000  | -0.476550000 | 2.546200000  | 1 | -7.316272000 | 5.100447000  | -5.333818000 |
| 1  | 6.736196000  | 2.676573000  | 3.385594000  | 1 | -3.324229000 | 2.618575000  | -3.742146000 |
| 1  | 6.912096000  | 1.850272000  | 6.142989000  | 1 | -5.302471000 | 6.336888000  | -4.543855000 |
| 1  | 7.266340000  | 3.449076000  | 5.472205000  | 1 | -2.424606000 | 4.740184000  | -3.169006000 |
| 1  | 4.296921000  | 3.209636000  | 4.460195000  | 1 | -7.955587000 | 1.589685000  | -3.188900000 |
| 1  | 2.581802000  | 3.091701000  | 6.628751000  | 1 | -9.487074000 | 1.615929000  | -4.085761000 |
| 1  | 3.413939000  | 5.119918000  | 7.502789000  | 1 | -8.808519000 | 3.121976000  | -3.430824000 |
| 1  | 1.800161000  | 5.414611000  | 6.862386000  | 6 | 6.994001000  | 5.915234000  | 1.497102000  |
| 1  | 5.392546000  | 6.132957000  | 6.497705000  | 6 | 7.563722000  | 4.551479000  | 1.136990000  |
| 1  | 1.494562000  | 6.896001000  | 4.859003000  | 8 | 7.471713000  | 3.558316000  | 1.872561000  |
| 1  | 6.325276000  | 7.997539000  | 5.149080000  | 6 | 5.730698000  | 6.292944000  | 0.690290000  |
| 1  | 2.417540000  | 8.749046000  | 3.508341000  | 6 | 4.681711000  | 5.190080000  | 0.762098000  |
| 1  | 4.835673000  | 9.309991000  | 3.643710000  | 6 | 3.272205000  | 5.524929000  | 0.537246000  |
| 1  | 0.365711000  | 4.464476000  | 5.549019000  | 8 | 3.083051000  | 6.681814000  | -0.223066000 |
| 1  | 0.462390000  | 4.266984000  | 2.738696000  | 8 | 2.424373000  | 4.587483000  | 0.335867000  |
| 1  | 0.209592000  | 1.890004000  | 3.118125000  | 7 | 8.197473000  | 4.464562000  | -0.059968000 |

|   |              |              |              |   |              |              |              |
|---|--------------|--------------|--------------|---|--------------|--------------|--------------|
| 6 | 8.662921000  | 3.181251000  | -0.572884000 | 8 | -1.050669000 | 4.181080000  | -2.523908000 |
| 6 | 9.285380000  | 3.333502000  | -1.970439000 | 6 | 1.592643000  | 2.482904000  | -2.331316000 |
| 6 | 8.318477000  | 3.891196000  | -2.997585000 | 6 | 1.783419000  | 1.020526000  | -2.644805000 |
| 6 | 7.230033000  | 3.125967000  | -3.445214000 | 6 | 0.856810000  | 0.084189000  | -3.073011000 |
| 6 | 8.463995000  | 5.195794000  | -3.488457000 | 6 | 3.033876000  | 0.311992000  | -2.533974000 |
| 6 | 6.309059000  | 3.654620000  | -4.348524000 | 7 | 1.450288000  | -1.144040000 | -3.239557000 |
| 6 | 7.543396000  | 5.728551000  | -4.396083000 | 6 | 2.781267000  | -1.038525000 | -2.915531000 |
| 6 | 6.462093000  | 4.959739000  | -4.825678000 | 6 | 4.337925000  | 0.676084000  | -2.146074000 |
| 1 | 5.320005000  | 7.222996000  | 1.095259000  | 6 | 3.789565000  | -2.013618000 | -2.920764000 |
| 1 | 5.984416000  | 6.503624000  | -0.356854000 | 6 | 5.336359000  | -0.292060000 | -2.142346000 |
| 1 | 4.556942000  | 4.863992000  | 1.803476000  | 6 | 5.064116000  | -1.623988000 | -2.529471000 |
| 1 | 5.036350000  | 4.314526000  | 0.204035000  | 8 | -1.764444000 | 2.152136000  | -1.818245000 |
| 1 | 6.748456000  | 5.881393000  | 2.562915000  | 1 | 1.382546000  | 3.081084000  | -3.227312000 |
| 1 | 9.638438000  | 2.342007000  | -2.280446000 | 1 | 2.527151000  | 2.876351000  | -1.918739000 |
| 1 | 10.171172000 | 3.978139000  | -1.903770000 | 1 | -0.197673000 | 0.210630000  | -3.282186000 |
| 1 | 7.093336000  | 2.108404000  | -3.086200000 | 1 | 4.559489000  | 1.694906000  | -1.838089000 |
| 1 | 9.311998000  | 5.797396000  | -3.164815000 | 1 | 6.344603000  | -0.025261000 | -1.829394000 |
| 1 | 5.469917000  | 3.045861000  | -4.673129000 | 1 | 3.572073000  | -3.034002000 | -3.219193000 |
| 1 | 7.672663000  | 6.743459000  | -4.763353000 | 1 | 5.866019000  | -2.358243000 | -2.519443000 |
| 1 | 5.740115000  | 5.372776000  | -5.524610000 | 1 | 0.797792000  | 3.741876000  | -0.781968000 |
| 1 | 7.826717000  | 2.470795000  | -0.609267000 | 1 | -0.338700000 | 2.061740000  | 0.456949000  |
| 1 | 8.076992000  | 5.220491000  | -0.723032000 | 1 | -0.037154000 | 0.925807000  | -0.728742000 |
| 1 | 9.397226000  | 2.769116000  | 0.127683000  | 1 | 1.219330000  | 1.490346000  | 0.233563000  |
| 1 | 7.772493000  | 6.678610000  | 1.359902000  | 1 | 0.964482000  | -2.040404000 | -3.449168000 |
| 8 | 0.327980000  | -3.685648000 | -3.577779000 | 8 | 1.486524000  | -4.463192000 | -3.839367000 |
| 7 | 0.334297000  | 1.764356000  | -0.270592000 | 7 | 1.776371000  | -5.263801000 | -2.739019000 |
| 6 | 0.479546000  | 2.839137000  | -1.309478000 | 8 | 2.771774000  | -5.900927000 | -2.951356000 |
| 6 | -0.902942000 | 3.074444000  | -1.945864000 |   |              |              |              |

## Cartesian coordinates of optimized geometries:

### Model B system – C6

| ${}^2\text{Re}_B$ |              |              |              |   |              |              |              |
|-------------------|--------------|--------------|--------------|---|--------------|--------------|--------------|
| 26                | 0.044462000  | -5.961780000 | -2.255076000 | 7 | 4.443612000  | 3.889952000  | 5.111186000  |
| 7                 | -0.082372000 | -4.584191000 | -0.768116000 | 1 | 4.577217000  | 3.658667000  | 4.133690000  |
| 7                 | 1.962518000  | -5.428300000 | -2.547481000 | 6 | 3.125958000  | 4.391248000  | 5.466122000  |
| 7                 | 0.139835000  | -7.307814000 | -3.763423000 | 1 | 2.724548000  | 3.756486000  | 6.265654000  |
| 7                 | -1.890786000 | -6.478050000 | -1.974403000 | 6 | 3.126671000  | 5.845290000  | 6.027037000  |
| 6                 | -1.218615000 | -4.222542000 | -0.086977000 | 1 | 3.701416000  | 5.801687000  | 6.957016000  |
| 6                 | -0.938548000 | -3.116879000 | 0.827035000  | 1 | 2.092552000  | 6.092457000  | 6.295511000  |
| 6                 | 0.394220000  | -2.851910000 | 0.683514000  | 6 | 3.691703000  | 6.908017000  | 5.113461000  |
| 6                 | 0.911039000  | -3.753946000 | -0.317139000 | 6 | 5.055962000  | 7.231025000  | 5.155196000  |
| 6                 | 2.700251000  | -4.520269000 | -1.832729000 | 6 | 2.863042000  | 7.604706000  | 4.221126000  |
| 6                 | 4.049119000  | -4.460727000 | -2.348212000 | 6 | 5.582089000  | 8.222399000  | 4.323631000  |
| 6                 | 4.110712000  | -5.339953000 | -3.387252000 | 6 | 3.385179000  | 8.596245000  | 3.387807000  |
| 6                 | 2.802365000  | -5.944336000 | -3.501779000 | 6 | 4.747134000  | 8.907683000  | 3.436850000  |
| 6                 | 1.234911000  | -7.548770000 | -4.550574000 | 1 | 5.705676000  | 6.709636000  | 5.853982000  |
| 6                 | 0.937130000  | -8.590974000 | -5.508288000 | 1 | 1.800187000  | 7.373760000  | 4.188559000  |
| 6                 | -0.347362000 | -8.981835000 | -5.276898000 | 1 | 6.640494000  | 8.465330000  | 4.375215000  |
| 6                 | -0.836601000 | -8.172641000 | -4.183420000 | 1 | 2.729194000  | 9.128811000  | 2.705057000  |
| 6                 | -2.603597000 | -7.456080000 | -2.620243000 | 1 | 5.152179000  | 9.683280000  | 2.792323000  |
| 6                 | -3.954957000 | -7.504978000 | -2.110750000 | 6 | 2.247254000  | 4.232343000  | 4.223728000  |
| 6                 | -4.050224000 | -6.531399000 | -1.162400000 | 8 | 2.729350000  | 4.235239000  | 3.085134000  |
| 6                 | -2.753624000 | -5.894918000 | -1.084887000 | 7 | 0.932133000  | 4.063724000  | 4.482928000  |
| 6                 | -2.457148000 | -4.838512000 | -0.226177000 | 1 | 0.616559000  | 4.252571000  | 5.426285000  |
| 6                 | 2.221338000  | -3.742985000 | -0.783086000 | 6 | -0.080918000 | 4.122616000  | 3.449378000  |
| 6                 | 2.468939000  | -6.914763000 | -4.440660000 | 1 | 0.438573000  | 4.316406000  | 2.505571000  |
| 6                 | -2.116236000 | -8.260556000 | -3.644301000 | 6 | -0.800577000 | 2.757429000  | 3.291212000  |
| 1                 | -3.270832000 | -4.476875000 | 0.393903000  | 1 | -0.000293000 | 2.014431000  | 3.159378000  |
| 1                 | 2.913382000  | -3.047871000 | -0.317025000 | 8 | -1.571525000 | 2.853153000  | 2.094508000  |
| 1                 | 3.245734000  | -7.218265000 | -5.136247000 | 1 | -2.185964000 | 2.082814000  | 2.027248000  |
| 1                 | -2.792064000 | -8.995335000 | -4.071430000 | 6 | -1.654910000 | 2.368644000  | 4.499178000  |
| 1                 | 0.978914000  | -2.094171000 | 1.194400000  | 1 | -1.046235000 | 2.303820000  | 5.407991000  |
| 1                 | 4.830196000  | -3.819671000 | -1.958548000 | 1 | -2.111674000 | 1.386864000  | 4.336918000  |
| 1                 | 4.953811000  | -5.571369000 | -4.026425000 | 1 | -2.459494000 | 3.094798000  | 4.661754000  |
| 1                 | 1.633389000  | -8.964012000 | -6.249235000 | 6 | -0.983241000 | 5.341854000  | 3.735177000  |
| 1                 | -0.925620000 | -9.740536000 | -5.789523000 | 8 | -0.691135000 | 6.159250000  | 4.613961000  |
| 1                 | -4.718891000 | -8.191976000 | -2.453220000 | 7 | -2.059758000 | 5.449432000  | 2.927985000  |
| 1                 | -4.908302000 | -6.255289000 | -0.562012000 | 1 | -2.267492000 | 4.657611000  | 2.318454000  |
| 6                 | -1.926035000 | -2.392924000 | 1.705262000  | 6 | -2.945767000 | 6.590812000  | 2.965880000  |
| 6                 | -2.392948000 | -1.046022000 | 1.112269000  | 1 | -2.596144000 | 7.236184000  | 3.774845000  |
| 6                 | -3.434772000 | -0.309231000 | 1.963464000  | 6 | -2.932400000 | 7.372549000  | 1.615431000  |
| 8                 | -3.544875000 | 0.963057000  | 1.770657000  | 1 | -3.642785000 | 8.204121000  | 1.703808000  |
| 8                 | -4.130353000 | -0.955434000 | 2.777215000  | 1 | -3.336778000 | 6.692945000  | 0.858602000  |
| 1                 | -1.465137000 | -2.201389000 | 2.682117000  | 6 | -1.595697000 | 7.871588000  | 1.161641000  |
| 1                 | -2.807332000 | -3.009969000 | 1.902278000  | 6 | -0.715390000 | 7.165647000  | 0.369620000  |
| 1                 | -1.539778000 | -0.378416000 | 0.950063000  | 7 | 0.392698000  | 7.921393000  | 0.079284000  |
| 1                 | -2.840183000 | -1.210465000 | 0.121409000  | 1 | -0.811564000 | 6.155964000  | -0.007879000 |
| 16                | 0.760054000  | -7.743023000 | -0.826271000 | 1 | 1.169922000  | 7.607186000  | -0.523005000 |
| 1                 | 1.538549000  | -7.035955000 | 0.024855000  | 6 | -0.987331000 | 9.160018000  | 1.382366000  |
| 8                 | -0.577687000 | -4.726537000 | -3.554875000 | 6 | 0.258131000  | 9.150015000  | 0.683107000  |
| 7                 | 3.762214000  | 1.806918000  | 1.801397000  | 6 | -1.359594000 | 10.326484000 | 2.078387000  |
| 1                 | 4.733268000  | 2.073131000  | 1.666154000  | 6 | 1.121808000  | 10.253824000 | 0.670742000  |
| 1                 | 3.101197000  | 2.573772000  | 1.876808000  | 6 | -0.507421000 | 11.425852000 | 2.064119000  |
| 6                 | 3.384493000  | 0.610497000  | 2.318563000  | 6 | 0.722803000  | 11.389285000 | 1.369478000  |
| 8                 | 2.209132000  | 0.355823000  | 2.603275000  | 1 | -2.301014000 | 10.370429000 | 2.621999000  |
| 6                 | 4.474810000  | -0.447250000 | 2.497642000  | 1 | -0.788072000 | 12.329515000 | 2.599481000  |
| 1                 | 4.108961000  | -1.133129000 | 3.265298000  | 1 | 1.368363000  | 12.263726000 | 1.382362000  |
| 1                 | 4.548666000  | -1.019264000 | 1.563489000  | 1 | 2.068266000  | 10.198831000 | 0.139950000  |
| 6                 | 5.872490000  | 0.069280000  | 2.882389000  | 6 | -4.378339000 | 6.118021000  | 3.224125000  |
| 1                 | 6.307290000  | 0.687694000  | 2.092993000  | 8 | -4.791966000 | 5.043249000  | 2.759503000  |
| 1                 | 6.532462000  | -0.799257000 | 2.999536000  | 7 | -5.167649000 | 6.978046000  | 3.896040000  |
| 6                 | 5.877304000  | 0.797422000  | 4.225737000  | 1 | -4.749982000 | 7.816082000  | 4.279094000  |
| 8                 | 5.428367000  | 0.279836000  | 5.249878000  | 6 | -6.604577000 | 6.787316000  | 4.074927000  |
| 7                 | 6.436385000  | 2.041668000  | 4.225998000  | 1 | -7.069927000 | 7.777053000  | 4.037637000  |
| 1                 | 6.713346000  | 2.459152000  | 3.339435000  | 1 | -6.970442000 | 6.220602000  | 3.215190000  |
| 6                 | 6.601234000  | 2.779770000  | 5.464661000  | 6 | -6.973058000 | 6.108236000  | 5.400130000  |
| 1                 | 6.963664000  | 2.111416000  | 6.248846000  | 1 | -6.492372000 | 6.666764000  | 6.213092000  |
| 1                 | 7.354847000  | 3.557921000  | 5.304178000  | 1 | -8.055363000 | 6.233452000  | 5.548144000  |
| 6                 | 5.335541000  | 3.449747000  | 6.029792000  | 6 | -6.618282000 | 4.622817000  | 5.540288000  |
| 8                 | 5.195633000  | 3.609800000  | 7.243203000  | 1 | -6.744939000 | 4.326726000  | 6.588875000  |
|                   |              |              |              | 1 | -5.564031000 | 4.456702000  | 5.294033000  |



|    |              |              |              |   |              |              |              |
|----|--------------|--------------|--------------|---|--------------|--------------|--------------|
| 1  | -5.024324000 | -5.666331000 | -0.260717000 | 6 | -0.968625000 | 6.996722000  | 0.351513000  |
| 6  | -1.912115000 | -2.012317000 | 2.152485000  | 7 | 0.177052000  | 7.684008000  | 0.026038000  |
| 6  | -2.502376000 | -0.708035000 | 1.587110000  | 1 | -1.120506000 | 5.987561000  | -0.011134000 |
| 6  | -3.450230000 | 0.041960000  | 2.522417000  | 1 | 0.942307000  | 7.337607000  | -0.571414000 |
| 8  | -3.719721000 | 1.262533000  | 2.176868000  | 6 | -1.094742000 | 9.020375000  | 1.339227000  |
| 8  | -3.907762000 | -0.519387000 | 3.537156000  | 6 | 0.133216000  | 8.924980000  | 0.620026000  |
| 1  | -1.368390000 | -1.783499000 | 3.076059000  | 6 | -1.379855000 | 10.211788000 | 2.034574000  |
| 1  | -2.726104000 | -2.687620000 | 2.433851000  | 6 | 1.071677000  | 9.965998000  | 0.592086000  |
| 1  | -1.691090000 | -0.025135000 | 1.308619000  | 6 | -0.457027000 | 11.251776000 | 2.001641000  |
| 1  | -3.051421000 | -0.912290000 | 0.657195000  | 6 | 0.759050000  | 11.127824000 | 1.291881000  |
| 16 | 0.601255000  | -6.926782000 | -0.706146000 | 1 | -2.308259000 | 10.320822000 | 2.591210000  |
| 1  | -0.311478000 | -7.871975000 | -1.020518000 | 1 | -0.668815000 | 12.174977000 | 2.535318000  |
| 8  | -0.916095000 | -4.098631000 | -3.253868000 | 1 | 1.462954000  | 11.956207000 | 1.293166000  |
| 7  | 3.526138000  | 1.555665000  | 2.055140000  | 1 | 2.009125000  | 9.842319000  | 0.056267000  |
| 1  | 4.500572000  | 1.780051000  | 1.874548000  | 6 | -4.411814000 | 6.522627000  | 3.714794000  |
| 1  | 2.901805000  | 2.350390000  | 2.149457000  | 8 | -5.037410000 | 5.541696000  | 3.280628000  |
| 6  | 3.131751000  | 0.400908000  | 2.646722000  | 7 | -4.936426000 | 7.398468000  | 4.596169000  |
| 8  | 1.964178000  | 0.213507000  | 3.008891000  | 1 | -4.351614000 | 8.155500000  | 4.925494000  |
| 6  | 4.182446000  | -0.698933000 | 2.806014000  | 6 | -6.311131000 | 7.335178000  | 5.090371000  |
| 1  | 3.831956000  | -1.340847000 | 3.617629000  | 1 | -6.689891000 | 8.360964000  | 5.141025000  |
| 1  | 4.177624000  | -1.306040000 | 1.891411000  | 1 | -6.898199000 | 6.805338000  | 4.336820000  |
| 6  | 5.621402000  | -0.235242000 | 3.094290000  | 6 | -6.445083000 | 6.676484000  | 6.473749000  |
| 1  | 6.031292000  | 0.353687000  | 2.269582000  | 1 | -5.828124000 | 7.235269000  | 7.188369000  |
| 1  | 6.251204000  | -1.128500000 | 3.186311000  | 1 | -7.486284000 | 6.801528000  | 6.802064000  |
| 6  | 5.734548000  | 0.510249000  | 4.422693000  | 6 | -6.057034000 | 5.190778000  | 6.539146000  |
| 8  | 5.361784000  | 0.006695000  | 5.483946000  | 1 | -6.039395000 | 4.876793000  | 7.590333000  |
| 7  | 6.293675000  | 1.752608000  | 4.364459000  | 1 | -5.039067000 | 5.049837000  | 6.156525000  |
| 1  | 6.509978000  | 2.159305000  | 3.455545000  | 6 | -7.024875000 | 4.274963000  | 5.773422000  |
| 6  | 6.543548000  | 2.505803000  | 5.578748000  | 1 | -8.040645000 | 4.388490000  | 6.166546000  |
| 1  | 6.941807000  | 1.842698000  | 6.349702000  | 1 | -7.062906000 | 4.537871000  | 4.714142000  |
| 1  | 7.298231000  | 3.269298000  | 5.362008000  | 7 | -6.684787000 | 2.855421000  | 5.875092000  |
| 6  | 5.327040000  | 3.207763000  | 6.207663000  | 1 | -6.915382000 | 2.392105000  | 6.743882000  |
| 8  | 5.272744000  | 3.398584000  | 7.423866000  | 6 | -5.873345000 | 2.180058000  | 5.034228000  |
| 7  | 4.386127000  | 3.646508000  | 5.338821000  | 7 | -5.332493000 | 2.763653000  | 3.964915000  |
| 1  | 4.440148000  | 3.386369000  | 4.360557000  | 1 | -5.298118000 | 3.776251000  | 3.848112000  |
| 6  | 3.127122000  | 4.229985000  | 5.764466000  | 1 | -4.741575000 | 2.195502000  | 3.335864000  |
| 1  | 2.709891000  | 3.612089000  | 6.569783000  | 7 | -5.622021000 | 0.884080000  | 5.265989000  |
| 6  | 3.269438000  | 5.670832000  | 6.344566000  | 1 | -6.180011000 | 0.373184000  | 5.934526000  |
| 1  | 3.958335000  | 5.580394000  | 7.189010000  | 1 | -5.004999000 | 0.350805000  | 4.624846000  |
| 1  | 2.296123000  | 5.961989000  | 6.757610000  | 6 | -7.329113000 | 6.610608000  | -1.371977000 |
| 6  | 3.753353000  | 6.726833000  | 5.376280000  | 1 | -7.480310000 | 7.496559000  | -0.746361000 |
| 6  | 5.123011000  | 6.995527000  | 5.237195000  | 1 | -8.196863000 | 5.953315000  | -1.237469000 |
| 6  | 2.842114000  | 7.469241000  | 4.608687000  | 1 | -7.317281000 | 6.937924000  | -2.418502000 |
| 6  | 5.573371000  | 7.975667000  | 4.349538000  | 6 | -6.025835000 | 5.895644000  | -1.002035000 |
| 6  | 3.288930000  | 8.448506000  | 3.718357000  | 1 | -6.044440000 | 5.603969000  | 0.056968000  |
| 6  | 4.656735000  | 8.704469000  | 3.586489000  | 1 | -5.174841000 | 6.578074000  | -1.119136000 |
| 1  | 5.838768000  | 6.441510000  | 5.839592000  | 6 | -5.781523000 | 4.656231000  | -1.877851000 |
| 1  | 1.775287000  | 7.282842000  | 4.714233000  | 1 | -6.622867000 | 3.955980000  | -1.804502000 |
| 1  | 6.638151000  | 8.175843000  | 4.260815000  | 1 | -5.721357000 | 4.953329000  | -2.929446000 |
| 1  | 2.571220000  | 9.014519000  | 3.130367000  | 7 | -4.538126000 | 3.952325000  | -1.572410000 |
| 1  | 5.004085000  | 9.469937000  | 2.897844000  | 1 | -3.690254000 | 4.213728000  | -2.107645000 |
| 6  | 2.176420000  | 4.167171000  | 4.558314000  | 6 | -4.398957000 | 3.014414000  | -0.631072000 |
| 8  | 2.600569000  | 3.964739000  | 3.414385000  | 7 | -3.222852000 | 2.407083000  | -0.451774000 |
| 7  | 0.864868000  | 4.325133000  | 4.840278000  | 1 | -5.217739000 | 2.013610000  | 0.917389000  |
| 1  | 0.594176000  | 4.668405000  | 5.753803000  | 1 | -6.258999000 | 3.188433000  | 0.213372000  |
| 6  | -0.154350000 | 4.377221000  | 3.808422000  | 7 | -5.451396000 | 2.592262000  | 0.113336000  |
| 1  | 0.350016000  | 4.588629000  | 2.859479000  | 1 | -3.130957000 | 1.859873000  | 0.404867000  |
| 6  | -0.851734000 | 2.998913000  | 3.644791000  | 1 | -2.373005000 | 2.800377000  | -0.887781000 |
| 1  | -0.045267000 | 2.267019000  | 3.492092000  | 6 | -7.557082000 | 0.102408000  | -5.467632000 |
| 8  | -1.640027000 | 3.089346000  | 2.454355000  | 1 | -7.250126000 | -0.569387000 | -6.277548000 |
| 1  | -2.329872000 | 2.386575000  | 2.453986000  | 1 | -8.597839000 | -0.128629000 | -5.210375000 |
| 6  | -1.675946000 | 2.588272000  | 4.864695000  | 1 | -6.933000000 | -0.121811000 | -4.594862000 |
| 1  | -1.044874000 | 2.546141000  | 5.758837000  | 6 | -7.405579000 | 1.575706000  | -5.887871000 |
| 1  | -2.108694000 | 1.592970000  | 4.718332000  | 6 | -5.981369000 | 1.942848000  | -6.250677000 |
| 1  | -2.495054000 | 3.293928000  | 5.042564000  | 6 | -5.080886000 | 2.402516000  | -5.280365000 |
| 6  | -1.089383000 | 5.569582000  | 4.105756000  | 6 | -5.502645000 | 1.795332000  | -7.561218000 |
| 8  | -0.832372000 | 6.375462000  | 5.005510000  | 6 | -3.752848000 | 2.700577000  | -5.590672000 |
| 7  | -2.150817000 | 5.670415000  | 3.273834000  | 6 | -4.178851000 | 2.081023000  | -7.891276000 |
| 1  | -2.298510000 | 4.891743000  | 2.631511000  | 6 | -3.294525000 | 2.531006000  | -6.902809000 |
| 6  | -3.000799000 | 6.844266000  | 3.206564000  | 8 | -2.008216000 | 2.799693000  | -7.279771000 |
| 1  | -2.532317000 | 7.604448000  | 3.836052000  | 1 | -1.460116000 | 2.976185000  | -6.492616000 |
| 6  | -3.102464000 | 7.361522000  | 1.740508000  | 1 | -7.753485000 | 2.218518000  | -5.068756000 |
| 1  | -3.806494000 | 8.204340000  | 1.734007000  | 1 | -8.066564000 | 1.774005000  | -6.741571000 |
| 1  | -3.562226000 | 6.566892000  | 1.140944000  | 1 | -5.420300000 | 2.533268000  | -4.254734000 |
| 6  | -1.785651000 | 7.768552000  | 1.151974000  | 1 | -6.177742000 | 1.447256000  | -8.340595000 |



|   |              |              |              |   |              |             |              |
|---|--------------|--------------|--------------|---|--------------|-------------|--------------|
| 1 | 6.823274000  | 8.384262000  | 4.913902000  | 1 | -5.612113000 | 6.259584000 | -2.266807000 |
| 1 | 3.138544000  | 9.237446000  | 2.857022000  | 7 | -4.647005000 | 4.860926000 | -1.081062000 |
| 1 | 5.555003000  | 9.705493000  | 3.225277000  | 1 | -3.722584000 | 5.085035000 | -1.453677000 |
| 6 | 2.269668000  | 4.264920000  | 4.208761000  | 6 | -4.722221000 | 3.684898000 | -0.443155000 |
| 8 | 2.759591000  | 4.327756000  | 3.075771000  | 7 | -3.669704000 | 2.865983000 | -0.435814000 |
| 7 | 0.955693000  | 4.064979000  | 4.446470000  | 1 | -5.842407000 | 2.469689000 | 0.727423000  |
| 1 | 0.628970000  | 4.196198000  | 5.395479000  | 1 | -6.521254000 | 3.994115000 | 0.454206000  |
| 6 | -0.046333000 | 4.154820000  | 3.405799000  | 7 | -5.888030000 | 3.280522000 | 0.121195000  |
| 1 | 0.484834000  | 4.378739000  | 2.475124000  | 1 | -3.624691000 | 2.081408000 | 0.221909000  |
| 6 | -0.752886000 | 2.790127000  | 3.209622000  | 1 | -2.798441000 | 3.218206000 | -0.839780000 |
| 1 | 0.056237000  | 2.058600000  | 3.070735000  | 6 | -8.455566000 | 1.954831000 | -4.226740000 |
| 8 | -1.521243000 | 2.895162000  | 2.009019000  | 1 | -8.014996000 | 0.956885000 | -4.118805000 |
| 1 | -2.108131000 | 2.104009000  | 1.938198000  | 1 | -9.546217000 | 1.853123000 | -4.170636000 |
| 6 | -1.611697000 | 2.370153000  | 4.404013000  | 1 | -8.126992000 | 2.557293000 | -3.371774000 |
| 1 | -1.008502000 | 2.294637000  | 5.315488000  | 6 | -8.025501000 | 2.603331000 | -5.554772000 |
| 1 | -2.056571000 | 1.387180000  | 4.220560000  | 6 | -6.523970000 | 2.767520000 | -5.654038000 |
| 1 | -2.424679000 | 3.084919000  | 4.573903000  | 6 | -5.870166000 | 3.798882000 | -4.964845000 |
| 6 | -0.951473000 | 5.365171000  | 3.719146000  | 6 | -5.730507000 | 1.866966000 | -6.378299000 |
| 8 | -0.650518000 | 6.171111000  | 4.604619000  | 6 | -4.482300000 | 3.923342000 | -4.974981000 |
| 7 | -2.041103000 | 5.481377000  | 2.929739000  | 6 | -4.339901000 | 1.975769000 | -6.404168000 |
| 1 | -2.255546000 | 4.704891000  | 2.304452000  | 6 | -3.704960000 | 3.000299000 | -5.690975000 |
| 6 | -2.931314000 | 6.616704000  | 3.013350000  | 8 | -2.343727000 | 3.068015000 | -5.728670000 |
| 1 | -2.588952000 | 7.222177000  | 3.855696000  | 1 | -2.030051000 | 3.742050000 | -5.076433000 |
| 6 | -2.912604000 | 7.471271000  | 1.705756000  | 1 | -8.515736000 | 3.581721000 | -5.648990000 |
| 1 | -3.619556000 | 8.300152000  | 1.839126000  | 1 | -8.387580000 | 1.991506000 | -6.390454000 |
| 1 | -3.317513000 | 6.835222000  | 0.913554000  | 1 | -6.459698000 | 4.521952000 | -4.403563000 |
| 6 | -1.568902000 | 7.972227000  | 1.281147000  | 1 | -6.207494000 | 1.058852000 | -6.929515000 |
| 6 | -0.740187000 | 7.323009000  | 0.392798000  | 1 | -3.986491000 | 4.717803000 | -4.426245000 |
| 7 | 0.407897000  | 8.042865000  | 0.179460000  | 1 | -3.734335000 | 1.269575000 | -6.965321000 |
| 1 | -0.919333000 | 6.396051000  | -0.136129000 | 8 | 2.412559000  | 6.353378000 | -0.796075000 |
| 1 | 1.219862000  | 7.660214000  | -0.327717000 | 8 | 3.767973000  | 8.068505000 | -0.327333000 |
| 6 | -0.882427000 | 9.183443000  | 1.655193000  | 6 | 3.509596000  | 6.852345000 | -0.332061000 |
| 6 | 0.358735000  | 9.184939000  | 0.946694000  | 6 | 4.500497000  | 5.853698000 | 0.292903000  |
| 6 | -1.184433000 | 10.274841000 | 2.492064000  | 1 | 4.018960000  | 5.462184000 | 1.199928000  |
| 6 | 1.285238000  | 10.229598000 | 1.064753000  | 1 | 4.613585000  | 4.995442000 | -0.382272000 |
| 6 | -0.268163000 | 11.315140000 | 2.607359000  | 6 | 5.852349000  | 6.479099000 | 0.647350000  |
| 6 | 0.956143000  | 11.291373000 | 1.902672000  | 1 | 5.665197000  | 7.447248000 | 1.119785000  |
| 1 | -2.122033000 | 10.306808000 | 3.043188000  | 1 | 6.417319000  | 6.692135000 | -0.269555000 |
| 1 | -0.493913000 | 12.161252000 | 3.251628000  | 6 | 6.711514000  | 5.639108000 | 1.616410000  |
| 1 | 1.652514000  | 12.118272000 | 2.016129000  | 1 | 6.148308000  | 5.438960000 | 2.532413000  |
| 1 | 2.224072000  | 10.190153000 | 0.520124000  | 1 | 7.600107000  | 6.219068000 | 1.898974000  |
| 6 | -4.363189000 | 6.128921000  | 3.243940000  | 6 | 7.166617000  | 4.297933000 | 1.061192000  |
| 8 | -4.764038000 | 5.053241000  | 2.768135000  | 8 | 6.722251000  | 3.210581000 | 1.480533000  |
| 7 | -5.165185000 | 6.983709000  | 3.906830000  | 7 | 8.088316000  | 4.353845000 | 0.077465000  |
| 1 | -4.753382000 | 7.819342000  | 4.301571000  | 1 | 8.453356000  | 5.262232000 | -0.178376000 |
| 6 | -6.602058000 | 6.788228000  | 4.076355000  | 6 | 8.662938000  | 3.181235000 | -0.572897000 |
| 1 | -7.070747000 | 7.776218000  | 4.035881000  | 1 | 7.921403000  | 2.381221000 | -0.513940000 |
| 1 | -6.961119000 | 6.220026000  | 3.214859000  | 1 | 9.552912000  | 2.846086000 | -0.023197000 |
| 6 | -6.973020000 | 6.108254000  | 5.400110000  | 6 | 9.046856000  | 3.467213000 | -2.035264000 |
| 1 | -6.495449000 | 6.667328000  | 6.214553000  | 1 | 9.554829000  | 2.571717000 | -2.413221000 |
| 1 | -8.055885000 | 6.231781000  | 5.545341000  | 1 | 9.788035000  | 4.276723000 | -2.060216000 |
| 6 | -6.617673000 | 4.624557000  | 5.537406000  | 6 | 7.872359000  | 3.814119000 | -2.927698000 |
| 1 | -6.760134000 | 4.320815000  | 6.581679000  | 6 | 7.014233000  | 2.808324000 | -3.397085000 |
| 1 | -5.560143000 | 4.459640000  | 5.304736000  | 6 | 7.606418000  | 5.141103000 | -3.293053000 |
| 6 | -7.499720000 | 3.737068000  | 4.650419000  | 6 | 5.920166000  | 3.119738000 | -4.206658000 |
| 1 | -8.554188000 | 3.888551000  | 4.900140000  | 6 | 6.510098000  | 5.458922000 | -4.099744000 |
| 1 | -7.385228000 | 3.993787000  | 3.593145000  | 6 | 5.663168000  | 4.448211000 | -4.559397000 |
| 7 | -7.231199000 | 2.309540000  | 4.798273000  | 1 | 7.207205000  | 1.770890000 | -3.132109000 |
| 1 | -7.710989000 | 1.814711000  | 5.537812000  | 1 | 8.268888000  | 5.933956000 | -2.952174000 |
| 6 | -6.271002000 | 1.641194000  | 4.136097000  | 1 | 5.271914000  | 2.324645000 | -4.564237000 |
| 7 | -5.467263000 | 2.264200000  | 3.264346000  | 1 | 6.322236000  | 6.494291000 | -4.371351000 |
| 1 | -5.355341000 | 3.277310000  | 3.261580000  | 1 | 4.814513000  | 4.691217000 | -5.193148000 |
| 1 | -4.730268000 | 1.722484000  | 2.772648000  | 7 | 0.968145000  | 4.202204000 | -1.204221000 |
| 7 | -6.120429000 | 0.323045000  | 4.326396000  | 1 | 0.116649000  | 4.224899000 | -0.618807000 |
| 1 | -6.870541000 | -0.202203000 | 4.754075000  | 1 | 1.355199000  | 3.254312000 | -1.155883000 |
| 1 | -5.464567000 | -0.187951000 | 3.702683000  | 1 | 1.684758000  | 4.931988000 | -0.868794000 |
| 6 | -7.104654000 | 7.773255000  | -0.293235000 | 6 | 0.522753000  | 4.554148000 | -2.596705000 |
| 1 | -7.094050000 | 8.520790000  | 0.506566000  | 1 | 0.859147000  | 5.583240000 | -2.756029000 |
| 1 | -8.032826000 | 7.195623000  | -0.202891000 | 6 | -1.030632000 | 4.589962000 | -2.643127000 |
| 1 | -7.136087000 | 8.307797000  | -1.250203000 | 8 | -1.547282000 | 4.750995000 | -3.768813000 |
| 6 | -5.867515000 | 6.872066000  | -0.193209000 | 8 | -1.626585000 | 4.535347000 | -1.521758000 |
| 1 | -5.849216000 | 6.378207000  | 0.785123000  | 6 | 1.179712000  | 3.655244000 | -3.664091000 |
| 1 | -4.968182000 | 7.493474000  | -0.244164000 | 1 | 0.739560000  | 3.955096000 | -4.619113000 |
| 6 | -5.764286000 | 5.794381000  | -1.288346000 | 1 | 2.246102000  | 3.904270000 | -3.716026000 |
| 1 | -6.689885000 | 5.212809000  | -1.362021000 | 6 | 1.014900000  | 2.174709000 | -3.443232000 |



|                                            |              |              |              |   |              |              |              |
|--------------------------------------------|--------------|--------------|--------------|---|--------------|--------------|--------------|
| 6                                          | -0.074817000 | 1.397200000  | -3.829637000 | 6 | 5.084901000  | -0.359025000 | 2.374789000  |
| 1                                          | -0.961379000 | 1.684382000  | -4.379681000 | 1 | 5.461196000  | 0.223640000  | 1.529646000  |
| 7                                          | 0.128178000  | 0.096841000  | -3.440873000 | 1 | 5.656543000  | -1.295039000 | 3.292985000  |
| 1                                          | -0.489389000 | -0.676554000 | -3.643431000 | 6 | 5.364566000  | 0.349319000  | 3.698893000  |
| 6                                          | 1.355977000  | -0.018049000 | -2.808188000 | 8 | 5.059321000  | -0.149968000 | 4.783901000  |
| 6                                          | 1.929740000  | 1.295982000  | -2.795964000 | 7 | 5.993009000  | 1.556612000  | 3.606171000  |
| 6                                          | 3.212299000  | 1.471515000  | -2.177103000 | 1 | 6.147498000  | 1.971823000  | 2.688343000  |
| 6                                          | 3.862496000  | 0.412374000  | -1.629282000 | 6 | 6.386512000  | 2.278467000  | 4.800519000  |
| 6                                          | 1.959828000  | -1.127107000 | -2.262626000 | 1 | 6.799382000  | 1.583301000  | 5.534536000  |
| 6                                          | 3.315553000  | -0.982944000 | -1.683577000 | 1 | 7.169575000  | 2.994674000  | 4.529070000  |
| 1                                          | 3.667778000  | 2.458051000  | -2.132941000 | 6 | 5.266744000  | 3.045919000  | 5.523839000  |
| 1                                          | 4.827507000  | 0.540750000  | -1.150954000 | 8 | 5.291596000  | 3.195269000  | 6.746721000  |
| 1                                          | 1.497412000  | -2.106636000 | -2.245326000 | 7 | 4.309964000  | 3.583163000  | 4.728665000  |
| 1                                          | 3.419892000  | -1.514016000 | -0.731982000 | 1 | 4.285128000  | 3.363244000  | 3.738974000  |
| 4                                          | 4.378432000  | -1.837856000 | -2.546492000 | 6 | 3.109716000  | 4.198289000  | 5.265748000  |
| 8                                          | 5.476530000  | -2.005646000 | -2.025887000 | 1 | 2.759090000  | 3.588433000  | 6.107511000  |
| 8                                          | 4.056838000  | -2.236128000 | -3.657146000 | 6 | 3.338077000  | 5.633586000  | 5.828471000  |
| <b><sup>2</sup>TS4<sub>B,C6-endo</sub></b> |              |              |              | 1 | 4.087595000  | 5.525722000  | 6.617878000  |
| 26                                         | 2.306863000  | -4.885341000 | -0.372653000 | 1 | 2.407861000  | 5.953283000  | 6.313865000  |
| 7                                          | 1.179793000  | -4.229160000 | 1.181144000  | 6 | 3.775443000  | 6.669929000  | 4.818852000  |
| 7                                          | 3.874234000  | -5.170936000 | 0.873651000  | 6 | 5.137238000  | 6.914446000  | 4.589679000  |
| 7                                          | 3.384785000  | -5.688608000 | -1.890862000 | 6 | 2.828467000  | 7.413318000  | 4.096826000  |
| 7                                          | 0.676661000  | -4.803999000 | -1.568540000 | 6 | 5.545494000  | 7.874509000  | 3.660247000  |
| 6                                          | -0.121297000 | -3.799605000 | 1.138247000  | 6 | 3.233009000  | 8.371131000  | 3.164651000  |
| 6                                          | -0.542541000 | -3.317848000 | 2.450303000  | 6 | 4.593483000  | 8.605345000  | 2.944859000  |
| 6                                          | 0.536585000  | -3.488079000 | 3.266100000  | 1 | 5.881129000  | 6.357504000  | 5.154145000  |
| 6                                          | 1.602102000  | -4.051866000 | 2.470128000  | 1 | 1.767549000  | 7.241993000  | 4.268412000  |
| 6                                          | 3.918841000  | -4.870027000 | 2.208434000  | 1 | 6.605437000  | 8.056286000  | 3.501627000  |
| 6                                          | 5.238166000  | -5.143756000 | 2.734990000  | 1 | 2.487304000  | 8.936891000  | 2.612648000  |
| 6                                          | 5.987106000  | -5.605180000 | 1.695290000  | 1 | 4.907241000  | 9.352927000  | 2.221461000  |
| 6                                          | 5.125448000  | -5.616674000 | 0.533826000  | 6 | 2.050568000  | 4.156072000  | 4.154580000  |
| 6                                          | 4.702877000  | -6.056893000 | -1.858044000 | 8 | 2.368897000  | 3.990558000  | 2.970929000  |
| 6                                          | 5.126000000  | -6.506329000 | -3.166124000 | 7 | 0.771223000  | 4.287967000  | 4.563848000  |
| 6                                          | 4.043151000  | -6.402159000 | -3.985202000 | 1 | 0.583024000  | 4.554812000  | 5.521202000  |
| 6                                          | 2.958602000  | -5.889094000 | -3.177452000 | 6 | -0.353565000 | 4.246063000  | 3.649306000  |
| 6                                          | 0.617552000  | -5.152466000 | -2.893932000 | 1 | 0.048538000  | 4.392844000  | 2.641415000  |
| 6                                          | -0.708423000 | -4.900514000 | -3.411341000 | 6 | -1.011400000 | 2.839771000  | 3.667278000  |
| 6                                          | -1.440391000 | -4.386832000 | -2.381611000 | 1 | -0.197486000 | 2.125108000  | 3.484876000  |
| 6                                          | -0.562581000 | -4.328484000 | -1.234943000 | 8 | -1.924495000 | 2.808623000  | 2.566808000  |
| 6                                          | -0.940263000 | -3.851311000 | 0.018298000  | 1 | -2.428781000 | 1.962872000  | 2.585919000  |
| 6                                          | 2.865774000  | -4.359328000 | 2.960547000  | 6 | -1.695819000 | 2.501868000  | 4.993277000  |
| 6                                          | 5.521255000  | -6.027775000 | -0.733439000 | 1 | -0.979718000 | 2.532309000  | 5.821871000  |
| 6                                          | 1.672967000  | -5.650971000 | -3.649949000 | 1 | -2.112825000 | 1.489634000  | 4.958133000  |
| 1                                          | -1.962737000 | -3.502744000 | 0.122868000  | 1 | -2.513250000 | 3.199746000  | 5.206070000  |
| 1                                          | 3.051931000  | -4.169091000 | 4.013191000  | 6 | -1.290122000 | 5.438795000  | 3.937704000  |
| 1                                          | 6.548776000  | -6.357489000 | -0.853850000 | 8 | -0.952638000 | 6.351491000  | 4.695841000  |
| 1                                          | 1.478859000  | -5.865079000 | -4.696444000 | 7 | -2.459243000 | 5.404370000  | 3.255262000  |
| 1                                          | 0.616015000  | -3.248766000 | 4.319940000  | 1 | -2.655195000 | 4.557494000  | 2.720879000  |
| 1                                          | 5.532417000  | -4.993186000 | 3.766201000  | 6 | -3.368614000 | 6.529440000  | 3.177406000  |
| 1                                          | 7.025184000  | -5.913713000 | 1.694489000  | 1 | -2.959909000 | 7.308989000  | 3.824279000  |
| 1                                          | 6.123735000  | -6.853045000 | -3.405043000 | 6 | -3.480554000 | 7.062719000  | 1.713449000  |
| 1                                          | 3.965415000  | -6.644374000 | -5.037758000 | 1 | -4.198660000 | 7.893545000  | 1.716249000  |
| 1                                          | -1.019063000 | -5.095178000 | -4.430363000 | 1 | -3.927843000 | 6.263826000  | 1.109704000  |
| 1                                          | -2.477897000 | -4.076070000 | -2.379431000 | 6 | -2.173888000 | 7.492790000  | 1.118815000  |
| 6                                          | -1.875743000 | -2.724240000 | 2.809384000  | 6 | -1.333817000 | 6.713111000  | 0.349656000  |
| 6                                          | -2.047672000 | -1.270155000 | 2.328909000  | 7 | -0.209532000 | 7.419897000  | -0.004903000 |
| 6                                          | -3.270474000 | -0.559052000 | 2.915292000  | 1 | -1.456561000 | 5.686616000  | 0.026901000  |
| 8                                          | -3.570000000 | 0.592126000  | 2.398172000  | 1 | 0.571003000  | 7.063254000  | -0.576042000 |
| 8                                          | -3.895894000 | -1.080785000 | 3.859480000  | 6 | -1.520104000 | 8.771090000  | 1.254398000  |
| 1                                          | -1.991493000 | -2.741088000 | 3.897168000  | 6 | -0.289499000 | 8.681846000  | 0.537465000  |
| 1                                          | -2.694420000 | -3.334274000 | 2.406128000  | 6 | -1.839023000 | 9.982741000  | 1.897932000  |
| 1                                          | -1.160437000 | -0.681757000 | 2.602173000  | 6 | 0.616203000  | 9.749078000  | 0.460605000  |
| 1                                          | -2.106496000 | -1.219430000 | 1.235016000  | 6 | -0.947226000 | 11.047289000 | 1.818602000  |
| 16                                         | 1.538390000  | -7.233562000 | 0.195505000  | 6 | 0.270515000  | 10.930238000 | 1.110818000  |
| 1                                          | 2.746603000  | -7.777885000 | 0.466756000  | 1 | -2.769533000 | 10.088437000 | 2.451683000  |
| 8                                          | 2.790508000  | -3.356323000 | -0.751025000 | 1 | -1.185898000 | 11.985700000 | 2.312999000  |
| 7                                          | 2.978213000  | 1.556042000  | 1.500944000  | 1 | 0.948613000  | 11.779029000 | 1.073464000  |
| 1                                          | 3.928493000  | 1.687765000  | 1.169722000  | 1 | 1.553897000  | 9.633210000  | -0.076930000 |
| 1                                          | 2.476107000  | 2.411163000  | 1.722753000  | 6 | -4.764364000 | 6.104603000  | 3.645422000  |
| 6                                          | 2.624545000  | 0.455054000  | 2.219573000  | 8 | -5.281956000 | 5.053639000  | 3.231916000  |
| 8                                          | 1.551585000  | 0.386602000  | 2.828417000  | 7 | -5.403055000 | 6.969135000  | 4.459676000  |
| 6                                          | 3.597105000  | -0.722219000 | 2.202037000  | 1 | -4.900295000 | 7.788748000  | 4.773892000  |
| 1                                          | 3.284623000  | -1.393692000 | 3.003388000  | 6 | -6.796180000 | 6.822240000  | 4.879855000  |
| 1                                          | 3.469620000  | -1.267636000 | 1.257901000  | 1 | -7.237089000 | 7.823804000  | 4.900049000  |
|                                            |              |              |              | 1 | -7.310492000 | 6.254343000  | 4.100963000  |



|    |              |              |              |   |              |              |              |
|----|--------------|--------------|--------------|---|--------------|--------------|--------------|
| 1  | 1.385285000  | -5.926631000 | -4.702416000 | 1 | -2.657262000 | 4.543906000  | 2.722879000  |
| 1  | 0.637180000  | -3.235622000 | 4.301091000  | 6 | -3.371131000 | 6.517494000  | 3.171842000  |
| 1  | 5.561401000  | -4.933235000 | 3.685412000  | 1 | -2.960877000 | 7.300996000  | 3.812919000  |
| 1  | 7.035711000  | -5.842168000 | 1.595378000  | 6 | -3.485613000 | 7.040581000  | 1.704438000  |
| 1  | 6.061678000  | -6.846397000 | -3.477872000 | 1 | -4.203948000 | 7.871224000  | 1.702756000  |
| 1  | 3.871993000  | -6.688692000 | -5.074279000 | 1 | -3.933885000 | 6.237368000  | 1.107241000  |
| 1  | -1.112202000 | -5.164384000 | -4.408071000 | 6 | -2.180311000 | 7.466906000  | 1.104512000  |
| 1  | -2.543133000 | -4.122353000 | -2.349077000 | 6 | -1.340966000 | 6.682407000  | 0.339437000  |
| 6  | -1.875128000 | -2.726518000 | 2.819184000  | 7 | -0.217811000 | 7.387416000  | -0.021905000 |
| 6  | -2.055162000 | -1.276220000 | 2.330992000  | 1 | -1.463417000 | 5.653554000  | 0.024054000  |
| 6  | -3.274885000 | -0.564656000 | 2.922350000  | 1 | 0.562783000  | 7.025912000  | -0.590122000 |
| 8  | -3.577708000 | 0.584774000  | 2.403553000  | 6 | -1.527284000 | 8.746521000  | 1.229958000  |
| 8  | -3.894823000 | -1.084400000 | 3.871240000  | 6 | -0.297677000 | 8.653073000  | 0.511884000  |
| 1  | -1.977320000 | -2.736742000 | 3.908426000  | 6 | -1.846307000 | 9.962378000  | 1.865465000  |
| 1  | -2.697215000 | -3.340892000 | 2.429829000  | 6 | 0.607188000  | 9.720414000  | 0.426452000  |
| 1  | -1.167225000 | -0.683702000 | 2.592848000  | 6 | -0.955374000 | 11.026945000 | 1.777600000  |
| 1  | -2.123216000 | -1.232977000 | 1.237289000  | 6 | 0.261513000  | 10.905754000 | 1.069011000  |
| 16 | 1.538390000  | -7.233562000 | 0.195505000  | 1 | -2.776151000 | 10.071200000 | 2.419730000  |
| 1  | 2.758971000  | -7.767351000 | 0.430178000  | 1 | -1.194035000 | 11.968609000 | 2.265795000  |
| 8  | 2.735182000  | -3.348164000 | -0.804163000 | 1 | 0.938971000  | 11.754746000 | 1.024888000  |
| 7  | 2.987432000  | 1.569921000  | 1.489429000  | 1 | 1.544180000  | 9.601289000  | -0.111536000 |
| 1  | 3.938954000  | 1.704196000  | 1.162703000  | 6 | -4.766897000 | 6.097327000  | 3.643720000  |
| 1  | 2.484683000  | 2.423344000  | 1.716523000  | 8 | -5.288081000 | 5.047221000  | 3.232451000  |
| 6  | 2.632599000  | 0.463771000  | 2.199774000  | 7 | -5.401990000 | 6.964381000  | 4.458056000  |
| 8  | 1.558611000  | 0.390443000  | 2.806053000  | 1 | -4.896832000 | 7.783304000  | 4.770220000  |
| 6  | 3.606136000  | -0.712584000 | 2.176739000  | 6 | -6.795192000 | 6.821655000  | 4.879680000  |
| 1  | 3.291500000  | -1.390143000 | 2.971978000  | 1 | -7.233155000 | 7.824499000  | 4.900043000  |
| 1  | 3.481952000  | -1.251015000 | 1.228143000  | 1 | -7.311808000 | 6.255073000  | 4.101351000  |
| 6  | 5.093084000  | -0.349595000 | 2.357038000  | 6 | -6.970229000 | 6.165370000  | 6.259178000  |
| 1  | 5.472003000  | 0.238624000  | 1.516987000  | 1 | -6.429502000 | 6.763244000  | 7.003341000  |
| 1  | 5.665132000  | -1.285426000 | 2.371558000  | 1 | -8.034760000 | 6.232487000  | 6.523654000  |
| 6  | 5.367274000  | 0.350747000  | 3.686564000  | 6 | -6.505816000 | 4.704224000  | 6.364344000  |
| 8  | 5.058189000  | -0.155514000 | 4.767236000  | 1 | -6.580941000 | 4.387888000  | 7.412430000  |
| 7  | 5.994900000  | 1.559236000  | 3.603626000  | 1 | -5.447293000 | 4.621762000  | 6.089989000  |
| 1  | 6.153516000  | 1.979536000  | 2.688881000  | 6 | -7.333819000 | 3.739322000  | 5.501586000  |
| 6  | 6.384453000  | 2.273893000  | 4.803619000  | 1 | -8.395610000 | 3.820677000  | 5.758024000  |
| 1  | 6.791734000  | 1.573652000  | 5.535917000  | 1 | -7.240152000 | 3.983226000  | 4.441806000  |
| 1  | 7.170982000  | 2.989150000  | 4.539822000  | 7 | -6.960509000 | 2.336503000  | 5.681739000  |
| 6  | 5.263912000  | 3.041325000  | 5.525763000  | 1 | -7.291544000 | 1.883967000  | 6.523074000  |
| 8  | 5.286876000  | 3.189075000  | 6.748888000  | 6 | -6.044766000 | 1.654991000  | 4.962159000  |
| 7  | 4.309203000  | 3.580806000  | 4.729730000  | 7 | -5.389362000 | 2.216759000  | 3.944277000  |
| 1  | 4.286532000  | 3.363548000  | 7.339438000  | 1 | -5.383376000 | 3.223428000  | 3.782557000  |
| 6  | 3.109716000  | 4.198289000  | 5.265748000  | 1 | -4.729459000 | 1.636985000  | 3.404831000  |
| 1  | 2.759715000  | 3.591429000  | 6.109827000  | 7 | -5.804084000 | 0.373132000  | 5.265527000  |
| 6  | 3.339068000  | 5.635730000  | 5.822800000  | 1 | -6.417118000 | -0.117455000 | 5.900293000  |
| 1  | 4.090296000  | 5.531077000  | 6.611051000  | 1 | -5.111507000 | -0.178309000 | 4.721088000  |
| 1  | 2.409676000  | 5.956952000  | 6.308776000  | 6 | -7.598912000 | 5.379367000  | -1.308401000 |
| 6  | 3.773920000  | 6.668126000  | 4.808023000  | 1 | -7.822719000 | 6.253215000  | -0.687471000 |
| 6  | 5.135075000  | 6.912957000  | 4.575455000  | 1 | -8.418536000 | 4.661133000  | -1.183711000 |
| 6  | 2.824998000  | 7.406989000  | 4.083895000  | 1 | -7.595502000 | 5.704673000  | -2.355844000 |
| 6  | 5.540815000  | 7.868868000  | 3.640634000  | 6 | -6.251956000 | 4.762019000  | -0.918937000 |
| 6  | 3.226978000  | 8.360557000  | 3.146273000  | 1 | -6.258796000 | 4.475670000  | 0.141191000  |
| 6  | 4.586869000  | 8.595089000  | 2.923097000  | 1 | -5.451349000 | 5.503655000  | -1.033231000 |
| 1  | 5.880494000  | 6.359432000  | 5.141272000  | 6 | -5.907149000 | 3.540570000  | -1.785459000 |
| 1  | 1.764545000  | 7.235288000  | 4.257986000  | 1 | -6.692596000 | 2.777725000  | -1.719702000 |
| 1  | 6.600305000  | 8.050967000  | 3.479397000  | 1 | -5.856815000 | 3.837787000  | -2.837374000 |
| 1  | 2.479788000  | 8.922708000  | 2.592567000  | 7 | -4.613943000 | 2.940329000  | -1.462378000 |
| 1  | 4.898673000  | 9.339486000  | 2.195558000  | 1 | -3.788979000 | 3.290803000  | -1.971766000 |
| 6  | 2.050137000  | 4.153893000  | 4.154862000  | 6 | -4.392118000 | 2.054046000  | -0.487214000 |
| 8  | 2.369407000  | 3.993900000  | 2.970729000  | 7 | -3.147366000 | 1.616578000  | -0.251281000 |
| 7  | 0.770057000  | 4.279158000  | 4.564197000  | 1 | -5.132970000 | 1.011838000  | 1.075224000  |
| 1  | 0.580993000  | 4.539844000  | 5.523059000  | 1 | -6.319072000 | 1.927553000  | 0.213633000  |
| 6  | -0.354493000 | 4.237036000  | 3.649056000  | 7 | -5.401365000 | 1.510398000  | 0.229141000  |
| 1  | 0.048735000  | 4.383836000  | 2.641622000  | 1 | -3.021008000 | 1.108919000  | 0.626759000  |
| 6  | -1.011677000 | 2.830366000  | 3.666224000  | 1 | -2.367291000 | 2.206832000  | -0.571088000 |
| 1  | -0.197315000 | 2.116647000  | 3.482381000  | 6 | -8.716201000 | 6.935027000  | -6.256532000 |
| 8  | -1.925459000 | 2.799406000  | 2.566220000  | 1 | -8.914569000 | 5.990552000  | -5.990552000 |
| 1  | -2.430248000 | 1.954000000  | 2.585382000  | 1 | -9.532793000 | 7.629040000  | -6.488814000 |
| 6  | -1.694976000 | 2.490898000  | 4.992401000  | 1 | -8.738279000 | 6.733065000  | -5.179096000 |
| 1  | -0.978331000 | 2.520979000  | 5.820549000  | 6 | -7.356192000 | 7.521393000  | -6.678077000 |
| 1  | -2.111461000 | 1.478469000  | 4.956781000  | 6 | -6.189205000 | 6.603123000  | -6.376234000 |
| 1  | -2.512621000 | 3.188155000  | 5.206379000  | 6 | -5.540153000 | 6.636099000  | -5.134111000 |
| 6  | -1.291626000 | 5.430166000  | 3.935298000  | 6 | -5.735505000 | 5.666718000  | -7.317897000 |
| 8  | -0.953188000 | 6.346089000  | 4.689008000  | 6 | -4.484725000 | 5.772575000  | -4.833049000 |
| 7  | -2.462334000 | 5.392177000  | 3.255492000  | 6 | -4.684605000 | 4.795281000  | -7.036517000 |

|   |              |              |              |    |              |              |              |
|---|--------------|--------------|--------------|----|--------------|--------------|--------------|
| 6 | -4.050167000 | 4.838668000  | -5.786916000 | 7  | 1.828378000  | -3.620196000 | 0.480091000  |
| 8 | -3.023838000 | 3.975452000  | -5.555441000 | 7  | 4.481625000  | -4.129458000 | -0.471549000 |
| 1 | -2.720691000 | 4.046011000  | -4.613745000 | 7  | 3.391994000  | -5.335131000 | -2.830254000 |
| 1 | -7.208869000 | 8.481876000  | -6.167274000 | 7  | 0.755800000  | -4.756693000 | -1.928581000 |
| 1 | -7.380731000 | 7.741860000  | -7.753010000 | 6  | 0.499259000  | -3.446823000 | 0.764983000  |
| 1 | -5.856181000 | 7.360344000  | -4.385433000 | 6  | 0.335782000  | -2.845650000 | 2.085165000  |
| 1 | -6.212159000 | 5.619880000  | -8.295231000 | 6  | 1.599494000  | -2.658353000 | 2.563614000  |
| 1 | -3.984391000 | 5.826288000  | -3.869931000 | 6  | 2.519664000  | -3.140417000 | 1.559166000  |
| 1 | -4.340425000 | 4.076992000  | -7.775306000 | 6  | 4.809638000  | -3.552481000 | 0.724062000  |
| 8 | 1.970778000  | 6.268731000  | -1.412484000 | 6  | 6.248563000  | -3.483460000 | 0.864444000  |
| 8 | 3.408720000  | 7.856468000  | -0.749368000 | 6  | 6.778296000  | -4.028573000 | -0.266618000 |
| 6 | 3.077795000  | 6.668227000  | -0.867604000 | 6  | 5.662193000  | -4.435765000 | -1.092946000 |
| 6 | 3.973341000  | 5.561032000  | -0.284000000 | 6  | 4.723813000  | -5.518941000 | -3.104972000 |
| 1 | 3.549649000  | 5.301328000  | 0.698293000  | 6  | 4.879041000  | -6.244381000 | -4.344923000 |
| 1 | 3.882808000  | 4.657847000  | -0.900060000 | 6  | 3.625266000  | -6.494895000 | -4.813723000 |
| 6 | 5.442042000  | 5.959367000  | -0.123617000 | 6  | 2.702522000  | -5.917654000 | -3.863757000 |
| 1 | 5.490375000  | 6.923668000  | 0.389956000  | 6  | 0.418630000  | -5.379301000 | -3.101827000 |
| 1 | 5.890744000  | 6.124491000  | -1.112948000 | 6  | -1.018921000 | -5.403937000 | -3.255046000 |
| 6 | 6.270414000  | 4.938490000  | 0.682023000  | 6  | -1.539486000 | -4.794558000 | -2.152706000 |
| 1 | 5.902704000  | 4.889651000  | 1.711043000  | 6  | -0.420731000 | -4.401651000 | -1.092946000 |
| 1 | 7.317238000  | 5.268061000  | 0.724307000  | 6  | -0.549104000 | -3.796402000 | -0.077447000 |
| 6 | 6.236628000  | 3.513830000  | 0.141866000  | 6  | 3.904295000  | -3.106317000 | 1.680957000  |
| 8 | 5.900973000  | 2.546494000  | 0.852301000  | 6  | 5.783921000  | -5.084577000 | -2.316507000 |
| 7 | 6.605200000  | 3.347310000  | -1.144587000 | 6  | 1.319203000  | -5.937553000 | -4.002309000 |
| 1 | 6.794270000  | 4.168899000  | -1.705823000 | 1  | -1.559444000 | -3.602671000 | 0.268648000  |
| 6 | 6.604180000  | 2.055163000  | -1.822942000 | 1  | 4.313475000  | -2.701259000 | 2.600925000  |
| 1 | 5.597001000  | 1.829319000  | -2.199138000 | 1  | 6.787985000  | -5.286957000 | -2.677114000 |
| 1 | 6.853601000  | 1.291383000  | -1.082917000 | 1  | 0.912316000  | -6.420642000 | -4.885403000 |
| 6 | 7.617393000  | 2.024977000  | -2.980942000 | 1  | 1.889354000  | -2.211447000 | 3.507596000  |
| 1 | 7.589076000  | 1.015646000  | -3.408118000 | 1  | 6.765411000  | -3.074812000 | 1.723935000  |
| 1 | 8.624594000  | 2.174881000  | -2.575089000 | 1  | 7.820616000  | -4.161626000 | -0.528767000 |
| 6 | 7.333891000  | 3.052768000  | -4.058695000 | 1  | 5.831244000  | -6.515521000 | -4.783749000 |
| 6 | 6.321753000  | 2.835699000  | -5.007749000 | 1  | 3.333003000  | -7.011550000 | -5.719304000 |
| 6 | 8.052389000  | 4.256212000  | -4.114436000 | 1  | -1.542133000 | -5.842009000 | -4.096097000 |
| 6 | 6.033949000  | 3.795087000  | -5.979322000 | 1  | -2.579705000 | -4.628426000 | -1.900780000 |
| 6 | 7.764474000  | 5.221405000  | -5.084663000 | 6  | -0.961773000 | -2.481002000 | 2.751073000  |
| 6 | 6.753208000  | 4.993817000  | -6.019189000 | 6  | -1.486944000 | -2.103783000 | 2.313111000  |
| 1 | 5.761432000  | 1.903328000  | -4.990272000 | 6  | -2.754851000 | -0.640952000 | 3.030388000  |
| 1 | 8.854283000  | 4.434241000  | -3.400869000 | 8  | -3.147953000 | 0.557885000  | 2.741585000  |
| 1 | 5.251225000  | 3.605407000  | -6.709036000 | 8  | -3.340433000 | -1.388910000 | 3.838289000  |
| 1 | 8.334818000  | 6.146066000  | -5.111053000 | 1  | -0.817269000 | -2.472113000 | 3.836768000  |
| 1 | 6.529428000  | 5.740357000  | -6.776227000 | 1  | -1.728580000 | -3.238618000 | 2.552500000  |
| 7 | 1.191453000  | 3.882962000  | -2.066302000 | 1  | -0.715991000 | -0.339433000 | 2.474216000  |
| 1 | 0.735913000  | 3.443906000  | -1.245601000 | 1  | -1.689672000 | -1.090338000 | 1.233908000  |
| 1 | 1.900192000  | 3.243361000  | -2.428409000 | 16 | 2.511315000  | -6.574968000 | -0.009812000 |
| 1 | 1.646655000  | 4.832767000  | -1.744657000 | 1  | 2.645512000  | -7.419100000 | -1.058875000 |
| 6 | 0.078992000  | 4.137413000  | -3.043713000 | 8  | 2.676293000  | -2.838516000 | -1.915521000 |
| 1 | 0.077608000  | 5.213233000  | -3.243009000 | 7  | 3.475250000  | 1.558187000  | 2.970050000  |
| 6 | -1.243893000 | 3.772504000  | -2.320132000 | 1  | 4.384246000  | 1.814123000  | 2.596282000  |
| 8 | -2.325003000 | 3.907258000  | -2.959578000 | 1  | 2.728892000  | 2.222082000  | 2.791653000  |
| 8 | -1.133063000 | 3.373207000  | -1.132463000 | 6  | 3.324240000  | 0.737351000  | 4.039722000  |
| 6 | 0.275327000  | 3.386829000  | -4.381161000 | 8  | 2.229866000  | 0.560695000  | 4.585047000  |
| 1 | -0.466398000 | 3.788372000  | -5.078039000 | 6  | 4.565022000  | -0.020321000 | 4.517916000  |
| 1 | 1.255706000  | 3.665298000  | -4.786998000 | 1  | 4.393870000  | -0.256600000 | 5.570857000  |
| 6 | 0.134569000  | 1.889620000  | -4.297062000 | 1  | 4.598573000  | -0.973639000 | 3.976762000  |
| 6 | -1.065696000 | 1.198805000  | -4.439129000 | 6  | 5.920756000  | 0.689853000  | 4.359902000  |
| 1 | -2.050193000 | 1.583289000  | -4.663837000 | 1  | 6.147698000  | 0.909122000  | 3.313091000  |
| 7 | -0.850740000 | -0.143498000 | -4.260895000 | 1  | 6.702128000  | 0.006575000  | 4.714498000  |
| 1 | -1.560415000 | -0.859737000 | -4.310188000 | 6  | 6.018532000  | 1.942909000  | 5.225486000  |
| 6 | 0.491573000  | -0.369419000 | -4.002256000 | 8  | 5.813673000  | 1.908211000  | 6.440860000  |
| 6 | 1.134356000  | 0.912413000  | -4.029675000 | 7  | 6.367411000  | 3.093301000  | 4.583797000  |
| 6 | 2.546893000  | 0.959702000  | -3.782844000 | 1  | 6.425128000  | 3.107844000  | 3.566665000  |
| 6 | 3.241109000  | -0.175000000 | -3.506542000 | 6  | 6.543595000  | 4.319239000  | 5.339119000  |
| 6 | 1.137704000  | -1.553656000 | -3.734785000 | 1  | 7.148561000  | 4.127412000  | 6.227994000  |
| 6 | 2.599500000  | -1.532017000 | -3.487401000 | 1  | 7.077352000  | 5.037773000  | 4.708343000  |
| 1 | 3.079713000  | 1.908808000  | -3.817347000 | 6  | 5.249509000  | 4.985692000  | 5.838447000  |
| 1 | 4.307839000  | -0.142501000 | -3.312255000 | 8  | 5.231396000  | 5.610704000  | 6.900622000  |
| 1 | 0.611170000  | -2.499624000 | -3.685168000 | 7  | 4.186507000  | 4.888634000  | 5.007239000  |
| 1 | 2.871246000  | -2.110626000 | -2.590079000 | 1  | 4.242303000  | 4.327516000  | 4.164306000  |
| 7 | 3.361879000  | -2.402719000 | -4.598399000 | 6  | 2.867057000  | 5.396954000  | 5.329084000  |
| 8 | 4.558720000  | -2.593185000 | -4.405569000 | 1  | 2.580548000  | 5.040987000  | 6.327102000  |
| 8 | 2.730242000  | -2.824711000 | -5.558330000 | 6  | 2.795601000  | 6.955598000  | 5.371493000  |
|   |              |              |              | 1  | 3.510497000  | 7.264503000  | 6.138882000  |
|   |              |              |              | 1  | 1.798796000  | 7.238805000  | 5.730024000  |
|   |              |              |              | 6  | 3.090766000  | 7.643377000  | 4.058488000  |

<sup>2</sup>TSS<sub>B,C6-endo</sub>

26 2.616516000 -4.383647000 -1.230999000

|   |              |              |              |   |              |              |              |
|---|--------------|--------------|--------------|---|--------------|--------------|--------------|
| 6 | 4.408609000  | 7.962963000  | 3.699536000  | 1 | -9.130779000 | 4.383162000  | -1.686130000 |
| 6 | 2.055762000  | 7.967632000  | 3.167601000  | 1 | -8.246200000 | 5.012043000  | -3.086728000 |
| 6 | 4.688408000  | 8.573173000  | 2.474400000  | 6 | -6.971082000 | 4.526196000  | -1.384396000 |
| 6 | 2.332551000  | 8.575947000  | 1.941556000  | 1 | -7.020917000 | 4.570714000  | -0.287940000 |
| 6 | 3.650842000  | 8.876425000  | 1.589113000  | 1 | -6.149499000 | 5.187262000  | -1.686603000 |
| 1 | 5.217844000  | 7.741662000  | 4.390889000  | 6 | -6.633991000 | 3.094128000  | -1.828802000 |
| 1 | 1.025905000  | 7.742275000  | 3.437423000  | 1 | -7.440052000 | 2.400657000  | -1.559681000 |
| 1 | 5.715826000  | 8.815316000  | 2.214358000  | 1 | -6.552772000 | 3.058421000  | -2.919859000 |
| 1 | 1.519834000  | 8.816259000  | 1.261924000  | 7 | -5.365360000 | 2.592427000  | -1.303397000 |
| 1 | 3.864567000  | 9.337004000  | 0.629299000  | 1 | -4.523158000 | 2.753311000  | -1.876352000 |
| 6 | 1.899031000  | 4.797122000  | 4.296989000  | 6 | -5.196645000 | 1.955971000  | -0.137542000 |
| 8 | 2.313582000  | 4.239275000  | 3.273989000  | 7 | -3.988197000 | 1.517439000  | 0.202341000  |
| 7 | 0.583873000  | 4.910626000  | 4.584667000  | 1 | -6.068604000 | 1.422786000  | 1.626466000  |
| 1 | 0.281455000  | 5.544994000  | 5.315623000  | 1 | -7.093196000 | 2.249082000  | 0.555300000  |
| 6 | -0.436851000 | 4.531982000  | 3.624451000  | 7 | -6.260393000 | 1.689292000  | 0.666157000  |
| 1 | -0.014812000 | 4.643909000  | 2.618344000  | 1 | -3.795981000 | 1.093332000  | 1.115392000  |
| 6 | -0.834153000 | 3.038913000  | 3.758580000  | 1 | -3.172707000 | 1.782113000  | -0.371484000 |
| 1 | 0.105550000  | 2.468529000  | 3.770960000  | 6 | -6.024456000 | 10.474966000 | -3.936183000 |
| 8 | -1.566848000 | 2.735156000  | 2.570652000  | 1 | -6.637365000 | 10.188777000 | -4.799057000 |
| 1 | -2.044403000 | 1.873416000  | 2.673806000  | 1 | -6.164144000 | 11.548494000 | -0.202341000 |
| 6 | -1.609356000 | 2.720144000  | 5.037737000  | 1 | -6.407209000 | 9.935468000  | -3.061888000 |
| 1 | -1.023735000 | 3.004467000  | 5.918854000  | 6 | -4.540514000 | 10.143411000 | -4.180082000 |
| 1 | -1.811129000 | 1.646219000  | 5.100954000  | 6 | -4.286607000 | 8.669736000  | -4.428490000 |
| 1 | -2.567912000 | 3.249761000  | 5.064700000  | 6 | -3.981990000 | 7.797517000  | -3.374718000 |
| 6 | -1.599092000 | 5.537852000  | 3.744159000  | 6 | -4.370481000 | 8.121366000  | -5.717806000 |
| 8 | -1.482846000 | 6.570451000  | 4.412733000  | 6 | -3.767214000 | 6.434098000  | -3.588211000 |
| 7 | -2.701455000 | 5.206977000  | 3.034969000  | 6 | -4.159372000 | 6.763188000  | -5.951117000 |
| 1 | -2.678182000 | 4.300332000  | 2.564796000  | 6 | -3.853105000 | 5.904623000  | -4.885144000 |
| 6 | -3.801253000 | 6.124284000  | 2.796704000  | 8 | -3.649784000 | 4.586771000  | -5.161154000 |
| 1 | -3.515607000 | 7.077239000  | 3.247774000  | 1 | -3.418705000 | 4.092278000  | -4.333605000 |
| 6 | -4.043046000 | 6.307731000  | 1.268187000  | 1 | -3.954077000 | 10.473025000 | -3.312869000 |
| 1 | -4.872978000 | 7.015213000  | 1.143870000  | 1 | -4.182371000 | 10.727502000 | -5.037926000 |
| 1 | -4.393050000 | 5.344973000  | 0.877539000  | 1 | -3.895833000 | 8.188002000  | -2.362900000 |
| 6 | -2.832111000 | 6.769187000  | 0.513660000  | 1 | -4.598578000 | 8.771682000  | -6.560451000 |
| 6 | -1.864349000 | 5.955528000  | -0.041634000 | 1 | -3.520702000 | 5.782754000  | -2.754515000 |
| 7 | -0.870413000 | 6.708437000  | -0.618712000 | 1 | -4.219024000 | 6.352703000  | -6.955349000 |
| 1 | -1.811781000 | 4.874154000  | -0.064915000 | 8 | 1.379640000  | 5.470077000  | -7.108576000 |
| 1 | -0.031244000 | 6.328412000  | -1.086762000 | 8 | 2.818023000  | 7.172535000  | -1.466680000 |
| 6 | -2.403429000 | 8.123543000  | 0.263620000  | 6 | 2.501769000  | 5.984061000  | -1.313515000 |
| 6 | -1.167664000 | 8.039404000  | -0.446712000 | 6 | 3.436706000  | 5.036589000  | -0.537226000 |
| 6 | -2.929986000 | 9.398364000  | 0.550833000  | 1 | 3.157765000  | 5.137347000  | 0.523148000  |
| 6 | -0.457437000 | 9.175892000  | -0.857749000 | 1 | 3.217703000  | 3.998313000  | -0.808532000 |
| 6 | -2.232106000 | 10.528538000 | 0.136852000  | 6 | 4.927741000  | 5.353341000  | -0.703752000 |
| 6 | -1.005388000 | 10.418945000 | -0.556832000 | 1 | 5.048702000  | 6.440085000  | -0.663580000 |
| 1 | -3.869242000 | 9.501863000  | 1.089883000  | 1 | 5.264948000  | 5.057015000  | -1.707785000 |
| 1 | -2.631259000 | 11.515698000 | 0.355827000  | 6 | 5.831179000  | 4.737211000  | 0.379072000  |
| 1 | -0.481560000 | 11.321859000 | -0.859337000 | 1 | 5.577479000  | 5.158848000  | 1.357187000  |
| 1 | 0.489671000  | 9.071785000  | -1.380902000 | 1 | 6.878284000  | 5.010586000  | 0.185482000  |
| 6 | -5.085156000 | 5.581613000  | 3.439758000  | 6 | 5.793685000  | 3.223720000  | 0.559628000  |
| 8 | -5.517024000 | 4.457301000  | 3.137397000  | 8 | 5.937510000  | 2.713725000  | 1.689340000  |
| 7 | -5.721618000 | 6.408997000  | 4.293201000  | 7 | 5.621518000  | 2.469113000  | -0.544564000 |
| 1 | -5.288415000 | 7.297172000  | 4.508942000  | 1 | 5.547140000  | 2.940446000  | -1.436072000 |
| 6 | -7.030540000 | 6.126652000  | 4.883901000  | 6 | 5.582311000  | 1.008855000  | -0.541295000 |
| 1 | -7.572186000 | 7.076293000  | 4.934735000  | 1 | 4.758877000  | 0.687443000  | -1.187778000 |
| 1 | -7.567514000 | 5.481146000  | 4.184535000  | 1 | 5.352366000  | 0.694783000  | 0.477523000  |
| 6 | -6.973845000 | 5.503876000  | 6.289659000  | 6 | 6.901398000  | 0.353314000  | -1.004831000 |
| 1 | -6.398154000 | 6.169614000  | 6.944402000  | 1 | 6.813383000  | -0.722943000 | -0.812029000 |
| 1 | -7.998712000 | 5.492382000  | 6.686189000  | 1 | 7.715965000  | 0.729944000  | -0.374926000 |
| 6 | -6.377219000 | 4.089820000  | 6.371879000  | 6 | 7.207332000  | 0.591808000  | -2.468209000 |
| 1 | -6.269593000 | 3.814161000  | 7.428306000  | 6 | 6.691737000  | -0.267966000 | -3.451361000 |
| 1 | -5.368603000 | 4.082408000  | 5.942584000  | 6 | 7.975065000  | 1.690982000  | -2.880418000 |
| 6 | -7.240755000 | 3.025473000  | 5.676153000  | 6 | 6.928405000  | -0.031727000 | -4.807210000 |
| 1 | -8.253561000 | 3.030131000  | 6.091545000  | 6 | 8.215992000  | 1.929992000  | -4.236566000 |
| 1 | -7.333752000 | 3.231189000  | 4.607340000  | 6 | 7.691431000  | 1.070329000  | -5.204391000 |
| 7 | -6.727602000 | 1.662924000  | 5.837067000  | 1 | 6.104229000  | -1.134319000 | -3.155751000 |
| 1 | -6.956114000 | 1.187857000  | 6.699822000  | 1 | 8.392809000  | 2.360900000  | -2.132246000 |
| 6 | -5.804250000 | 1.077588000  | 5.050126000  | 1 | 6.516162000  | -0.712335000 | -5.547090000 |
| 7 | -5.351546000 | 1.681287000  | 3.939304000  | 1 | 8.816443000  | 2.785644000  | -4.534918000 |
| 1 | -5.456946000 | 2.689145000  | 3.816862000  | 1 | 7.879659000  | 1.254040000  | -6.258849000 |
| 1 | -4.508721000 | 1.253200000  | 3.502823000  | 7 | 0.506142000  | 3.074146000  | -2.223881000 |
| 7 | -5.360090000 | -0.147970000 | 5.345022000  | 1 | 0.094306000  | 2.617459000  | -1.389923000 |
| 1 | -5.746272000 | -0.655868000 | 6.127634000  | 1 | 1.152918000  | 2.413324000  | -2.659214000 |
| 1 | -4.633954000 | -0.613826000 | 4.763106000  | 1 | 1.021779000  | 3.988829000  | -1.931836000 |
| 6 | -8.289354000 | 5.017397000  | -1.991068000 | 6 | -0.664244000 | 3.409590000  | -3.106377000 |
| 1 | -8.508742000 | 6.041276000  | -1.670854000 | 1 | -0.699617000 | 4.501282000  | -3.166548000 |





|    |              |              |              |   |              |              |              |
|----|--------------|--------------|--------------|---|--------------|--------------|--------------|
| 6  | -2.410104000 | -4.545887000 | -0.356724000 | 6 | -1.650022000 | 2.394810000  | 4.452519000  |
| 6  | 2.297585000  | -3.557961000 | -0.891566000 | 1 | -1.046557000 | 2.326700000  | 5.364486000  |
| 6  | 2.535059000  | -6.693682000 | -4.585565000 | 1 | -2.098292000 | 1.410897000  | 4.279604000  |
| 6  | -2.129409000 | -7.823506000 | -3.924252000 | 1 | -2.460843000 | 3.113655000  | 4.616217000  |
| 1  | -3.212061000 | -4.193326000 | 0.282692000  | 6 | -0.987384000 | 5.377017000  | 3.731173000  |
| 1  | 3.003948000  | -2.893614000 | -0.403895000 | 8 | -0.705906000 | 6.184806000  | 4.622234000  |
| 1  | 3.316516000  | -7.017344000 | -5.265797000 | 7 | -2.058848000 | 5.487232000  | 2.917989000  |
| 1  | -2.829180000 | -8.509527000 | -4.391109000 | 1 | -2.254331000 | 4.701997000  | 2.295898000  |
| 1  | 1.095854000  | -1.933020000 | 1.124613000  | 6 | -2.954059000 | 6.620827000  | 2.961011000  |
| 1  | 4.922968000  | -3.714439000 | -1.995602000 | 1 | -2.614412000 | 7.261862000  | 3.777747000  |
| 1  | 5.050387000  | -5.452661000 | -4.074019000 | 6 | -2.936373000 | 7.414232000  | 1.617485000  |
| 1  | 1.632771000  | -8.641622000 | -6.471042000 | 1 | -3.651481000 | 8.241531000  | 1.707918000  |
| 1  | -0.975784000 | -9.284516000 | -6.091952000 | 1 | -3.331733000 | 6.739515000  | 0.851559000  |
| 1  | -4.731163000 | -7.730246000 | -2.759292000 | 6 | -1.598003000 | 7.922824000  | 1.178715000  |
| 1  | -4.889309000 | -5.886913000 | -0.774946000 | 6 | -0.709550000 | 7.229373000  | 0.384512000  |
| 6  | -1.810887000 | -2.196820000 | 1.647068000  | 7 | 0.399967000  | 7.990839000  | 0.114593000  |
| 6  | -2.382653000 | -0.906608000 | 1.023822000  | 1 | -0.800633000 | 6.224865000  | -0.007905000 |
| 6  | -3.431092000 | -0.208083000 | 1.895498000  | 1 | 1.183406000  | 7.688261000  | -0.485930000 |
| 8  | -3.574199000 | 1.062907000  | 1.717198000  | 6 | -0.993461000 | 9.208810000  | 1.422988000  |
| 8  | -4.098886000 | -0.880479000 | 2.710405000  | 6 | 0.257938000  | 9.210511000  | 0.734443000  |
| 1  | -1.299671000 | -1.939011000 | 2.582220000  | 6 | -1.373154000 | 10.364694000 | 2.132535000  |
| 1  | -2.644724000 | -2.848773000 | 1.923474000  | 6 | 1.120138000  | 10.315487000 | 0.744897000  |
| 1  | -1.580045000 | -0.195948000 | 0.800349000  | 6 | -0.522371000 | 11.465204000 | 2.141183000  |
| 1  | -2.861427000 | -1.138766000 | 0.061748000  | 6 | 0.713625000  | 11.440353000 | 1.456302000  |
| 16 | 0.760049000  | -7.743003000 | -0.826253000 | 1 | -2.319130000 | 10.399594000 | 2.668850000  |
| 1  | 1.904816000  | -8.015417000 | -1.493292000 | 1 | -0.808747000 | 12.360714000 | 2.687106000  |
| 8  | -0.523459000 | -4.239016000 | -3.893516000 | 1 | 1.357710000  | 12.315423000 | 1.487082000  |
| 7  | 3.760597000  | 1.846689000  | 1.771164000  | 1 | 2.071076000  | 10.269399000 | 0.221161000  |
| 1  | 4.731795000  | 2.117769000  | 1.647366000  | 6 | -4.384179000 | 6.133170000  | 3.209623000  |
| 1  | 3.096222000  | 2.609339000  | 1.857574000  | 8 | -4.785000000 | 5.055478000  | 2.740834000  |
| 6  | 3.380924000  | 0.632741000  | 2.241899000  | 7 | -5.182973000 | 6.983590000  | 3.883068000  |
| 8  | 2.202615000  | 0.364770000  | 2.503327000  | 1 | -4.772893000 | 7.823058000  | 4.271169000  |
| 6  | 4.473351000  | -0.425811000 | 2.402046000  | 6 | -6.617112000 | 6.777452000  | 4.066253000  |
| 1  | 4.102883000  | -1.133301000 | 3.147548000  | 1 | -7.095045000 | 7.760843000  | 4.018945000  |
| 1  | 4.557041000  | -0.972140000 | 1.453446000  | 1 | -6.976952000 | 6.196763000  | 3.213320000  |
| 1  | 5.866298000  | 0.084034000  | 2.811857000  | 6 | -6.973030000 | 6.108244000  | 5.400125000  |
| 6  | 6.307089000  | 0.720781000  | 2.040733000  | 1 | -6.487361000 | 6.674277000  | 6.204749000  |
| 1  | 6.526567000  | -0.786046000 | 2.915284000  | 1 | -8.054468000 | 6.229951000  | 5.556731000  |
| 6  | 5.858726000  | 0.781369000  | 4.171494000  | 6 | -6.609815000 | 4.623511000  | 5.547436000  |
| 8  | 5.399829000  | 0.240824000  | 5.179159000  | 1 | -6.709435000 | 4.337623000  | 6.601679000  |
| 7  | 6.419103000  | 2.024831000  | 4.205295000  | 1 | -5.560861000 | 4.459624000  | 5.277916000  |
| 1  | 6.705274000  | 2.461444000  | 3.331014000  | 6 | -7.520189000 | 3.709687000  | 4.712561000  |
| 6  | 6.578965000  | 2.732504000  | 5.462158000  | 1 | -8.562150000 | 3.840042000  | 5.019783000  |
| 1  | 6.919430000  | 2.039836000  | 6.234948000  | 1 | -7.470860000 | 3.963089000  | 3.649477000  |
| 1  | 7.347852000  | 3.501036000  | 5.330161000  | 7 | -7.214506000 | 2.285416000  | 4.848080000  |
| 6  | 5.317922000  | 3.410887000  | 6.027571000  | 1 | -7.641334000 | 1.782966000  | 5.614331000  |
| 8  | 5.171401000  | 3.553605000  | 7.242384000  | 6 | -6.271015000 | 1.641227000  | 4.136090000  |
| 7  | 4.439566000  | 3.879983000  | 5.110069000  | 7 | -5.539332000 | 2.295119000  | 3.222453000  |
| 1  | 4.575458000  | 3.660750000  | 4.130038000  | 1 | -5.431803000 | 3.308401000  | 3.252308000  |
| 6  | 3.125962000  | 4.391232000  | 5.466115000  | 1 | -4.785227000 | 1.777707000  | 2.722698000  |
| 1  | 2.716289000  | 3.752107000  | 6.257944000  | 7 | -6.066210000 | 0.331027000  | 4.309456000  |
| 6  | 3.140081000  | 5.838907000  | 6.042371000  | 1 | -6.735988000 | -0.225815000 | 4.820586000  |
| 1  | 3.722350000  | 5.781989000  | 6.966999000  | 1 | -5.347175000 | -0.151425000 | 3.734390000  |
| 1  | 2.109880000  | 6.089082000  | 6.323052000  | 6 | -7.147999000 | 7.828208000  | -0.284898000 |
| 6  | 3.702231000  | 6.908720000  | 5.135307000  | 1 | -7.070036000 | 8.557994000  | 0.527813000  |
| 6  | 5.069130000  | 7.221737000  | 5.163997000  | 1 | -8.086936000 | 7.276427000  | -0.152401000 |
| 6  | 2.867418000  | 7.622632000  | 4.262507000  | 1 | -7.218972000 | 8.384755000  | -1.227252000 |
| 6  | 5.591623000  | 8.220429000  | 4.338897000  | 6 | -5.937986000 | 6.888034000  | -0.278194000 |
| 6  | 3.385854000  | 8.621718000  | 3.436002000  | 1 | -5.877367000 | 6.370011000  | 0.686247000  |
| 6  | 4.750439000  | 8.923196000  | 3.471919000  | 1 | -5.019444000 | 7.476300000  | -0.372291000 |
| 1  | 5.724074000  | 6.686826000  | 5.847484000  | 6 | -5.942105000 | 5.836184000  | -1.402287000 |
| 1  | 1.802735000  | 7.398866000  | 4.239694000  | 1 | -6.895996000 | 5.295262000  | -1.436488000 |
| 1  | 6.652281000  | 8.455348000  | 4.380194000  | 1 | -5.837287000 | 6.323774000  | -2.376035000 |
| 1  | 2.725094000  | 9.167850000  | 2.768754000  | 7 | -4.837152000 | 4.877018000  | -1.292995000 |
| 1  | 5.152788000  | 9.704394000  | 2.832528000  | 1 | -3.970874000 | 5.058422000  | -1.828320000 |
| 6  | 2.249106000  | 4.253415000  | 4.219644000  | 6 | -4.849765000 | 3.768159000  | -0.540392000 |
| 8  | 2.735098000  | 4.257064000  | 3.082738000  | 7 | -3.762041000 | 3.003284000  | -0.456382000 |
| 7  | 0.931046000  | 4.099302000  | 4.472709000  | 1 | -5.897767000 | 2.696568000  | 0.833763000  |
| 1  | 0.612141000  | 4.286923000  | 5.415196000  | 1 | -6.719201000 | 4.045804000  | 0.229491000  |
| 6  | -0.076377000 | 4.167216000  | 3.434346000  | 7 | -5.992131000 | 3.363005000  | 0.075674000  |
| 1  | 0.447281000  | 4.375500000  | 2.495886000  | 1 | -3.738534000 | 2.212117000  | 0.193415000  |
| 6  | -0.790164000 | 2.801128000  | 3.254481000  | 1 | -2.854696000 | 3.361153000  | -0.798380000 |
| 1  | 0.012687000  | 2.061878000  | 3.117423000  | 6 | -8.555025000 | 2.165240000  | -3.902892000 |
| 8  | -1.553839000 | 2.908916000  | 2.053432000  | 1 | -8.439715000 | 1.080639000  | -4.012275000 |
| 1  | -2.193459000 | 2.159577000  | 1.991104000  | 1 | -9.617569000 | 2.379727000  | -3.736888000 |





|   |              |              |              |   |              |              |              |
|---|--------------|--------------|--------------|---|--------------|--------------|--------------|
| 1 | 4.446811000  | 3.383040000  | 4.368268000  | 1 | -5.296231000 | 3.775875000  | 3.849089000  |
| 6 | 3.127105000  | 4.229978000  | 5.764459000  | 1 | -4.738199000 | 2.195515000  | 3.337372000  |
| 1 | 2.711003000  | 3.612978000  | 6.571167000  | 7 | -5.625311000 | 0.884143000  | 5.268274000  |
| 6 | 3.260706000  | 5.674105000  | 6.339461000  | 1 | -6.187220000 | 0.375391000  | 5.935158000  |
| 1 | 3.946188000  | 5.590023000  | 7.187171000  | 1 | -5.007707000 | 0.349783000  | 4.628327000  |
| 1 | 2.284553000  | 5.963380000  | 6.746953000  | 6 | -7.329123000 | 6.610613000  | -1.371972000 |
| 6 | 3.745271000  | 6.727774000  | 5.368915000  | 1 | -7.472840000 | 7.500179000  | -0.749748000 |
| 6 | 5.114937000  | 6.998289000  | 5.232922000  | 1 | -8.198998000 | 5.957824000  | -1.229495000 |
| 6 | 2.835132000  | 7.466421000  | 4.596442000  | 1 | -7.321613000 | 6.932848000  | -2.420104000 |
| 6 | 5.566313000  | 7.976196000  | 4.343357000  | 6 | -6.026893000 | 5.891584000  | -1.005805000 |
| 6 | 3.282980000  | 8.443518000  | 3.704205000  | 1 | -6.040611000 | 5.606123000  | 0.054992000  |
| 6 | 4.650744000  | 8.7011058000 | 3.575266000  | 1 | -5.173539000 | 6.569450000  | -1.131858000 |
| 1 | 5.829763000  | 6.447833000  | 5.839660000  | 6 | -5.793416000 | 4.646209000  | -1.876288000 |
| 1 | 1.768290000  | 7.279180000  | 4.699983000  | 1 | -6.635940000 | 3.948679000  | -1.791734000 |
| 1 | 6.631024000  | 8.177814000  | 4.257119000  | 1 | -5.741371000 | 4.937424000  | -2.929985000 |
| 1 | 2.566052000  | 9.006640000  | 3.112505000  | 7 | -4.549384000 | 3.940236000  | -1.577787000 |
| 1 | 4.998889000  | 9.464800000  | 2.885108000  | 1 | -3.705352000 | 4.197433000  | -2.121107000 |
| 6 | 2.178145000  | 4.158667000  | 4.557895000  | 6 | -4.405155000 | 3.005578000  | -0.634003000 |
| 8 | 2.601690000  | 3.942045000  | 3.416341000  | 7 | -3.230604000 | 2.392609000  | -0.464356000 |
| 7 | 0.867409000  | 4.327102000  | 4.837270000  | 1 | -5.213601000 | 2.015357000  | 0.926739000  |
| 1 | 0.597366000  | 4.682780000  | 5.746303000  | 1 | -6.253121000 | 3.196532000  | 0.231970000  |
| 6 | -0.150211000 | 4.376713000  | 3.803984000  | 7 | -5.452269000 | 2.592747000  | 0.123222000  |
| 1 | 0.353915000  | 4.589427000  | 2.855122000  | 1 | -3.130633000 | 1.850515000  | 0.394325000  |
| 6 | -0.844746000 | 2.997324000  | 3.639766000  | 1 | -2.383994000 | 2.772188000  | -0.918718000 |
| 1 | -0.036363000 | 2.266122000  | 3.492681000  | 6 | -7.557076000 | 0.102412000  | -5.467632000 |
| 8 | -1.627176000 | 3.085285000  | 2.445443000  | 1 | -7.248112000 | -0.576904000 | -6.270499000 |
| 1 | -2.323928000 | 2.389194000  | 2.447085000  | 1 | -8.595703000 | -0.131883000 | -5.204894000 |
| 6 | -1.672750000 | 2.588211000  | 4.857643000  | 1 | -6.929274000 | -0.107724000 | -4.594025000 |
| 1 | -1.045021000 | 2.553399000  | 5.754434000  | 6 | -7.416219000 | 1.571835000  | -5.905411000 |
| 1 | -2.100492000 | 1.590312000  | 4.714887000  | 6 | -5.996154000 | 1.947697000  | -6.276698000 |
| 1 | -2.495570000 | 3.291131000  | 5.028833000  | 6 | -5.097374000 | 2.428537000  | -5.315035000 |
| 6 | -1.088653000 | 5.566163000  | 4.101983000  | 6 | -5.520297000 | 1.792085000  | -7.587421000 |
| 8 | -0.834563000 | 6.371108000  | 5.003475000  | 6 | -3.774515000 | 2.740832000  | -5.633850000 |
| 7 | -2.150060000 | 5.665524000  | 3.269912000  | 6 | -4.201577000 | 2.091468000  | -7.925924000 |
| 1 | -2.293072000 | 4.888969000  | 2.624062000  | 6 | -3.319341000 | 2.564246000  | -6.946211000 |
| 6 | -3.001027000 | 6.838866000  | 3.202182000  | 8 | -2.038590000 | 2.847768000  | -7.331728000 |
| 1 | -2.531486000 | 7.600587000  | 3.829021000  | 1 | -1.491662000 | 3.045719000  | -6.548760000 |
| 6 | -3.105700000 | 7.352562000  | 1.735134000  | 1 | -7.767051000 | 2.221438000  | -5.092919000 |
| 1 | -3.809461000 | 8.195561000  | 1.727994000  | 1 | -8.080965000 | 1.755433000  | -6.759487000 |
| 1 | -3.566947000 | 6.556600000  | 1.138495000  | 1 | -5.434210000 | 2.565480000  | -4.289347000 |
| 6 | -1.789853000 | 7.757643000  | 1.143307000  | 1 | -6.193876000 | 1.427516000  | -8.360554000 |
| 6 | -0.973231000 | 6.982768000  | 0.345417000  | 1 | -3.110369000 | 3.140816000  | -4.871040000 |
| 7 | 0.172262000  | 7.668847000  | 0.016597000  | 1 | -3.840977000 | 1.964325000  | -8.942619000 |
| 1 | -1.125664000 | 5.972185000  | -0.013094000 | 8 | 2.339729000  | 6.646727000  | -1.496881000 |
| 1 | 0.938259000  | 7.319961000  | -0.578638000 | 8 | 3.789095000  | 8.079822000  | -0.562443000 |
| 6 | -1.098827000 | 9.010101000  | 1.325513000  | 6 | 3.397224000  | 6.927995000  | -6.804577000 |
| 6 | 0.128727000  | 8.911980000  | 0.606124000  | 6 | 4.152799000  | 5.719645000  | -0.219650000 |
| 6 | -1.383553000 | 10.203997000 | 2.016763000  | 1 | 3.425564000  | 5.152852000  | 0.379296000  |
| 6 | 1.067383000  | 9.952731000  | 0.574095000  | 1 | 4.445973000  | 5.050392000  | -1.039952000 |
| 6 | -0.460576000 | 11.243680000 | 1.979759000  | 6 | 5.351051000  | 6.103764000  | 0.653690000  |
| 6 | 0.755208000  | 11.117015000 | 1.269944000  | 1 | 5.057914000  | 6.949760000  | 1.281574000  |
| 1 | -2.311706000 | 10.315126000 | 2.573381000  | 1 | 6.170574000  | 6.488234000  | 0.030866000  |
| 1 | -0.671987000 | 12.168804000 | 2.510237000  | 6 | 5.832365000  | 4.984603000  | 1.590175000  |
| 1 | 1.459248000  | 11.945276000 | 1.268075000  | 1 | 4.994833000  | 4.636279000  | 2.203157000  |
| 1 | 2.004620000  | 9.826922000  | 0.038413000  | 1 | 6.573380000  | 5.393774000  | 2.292507000  |
| 6 | -4.411420000 | 6.518871000  | 3.713371000  | 6 | 6.475164000  | 3.742980000  | 0.986664000  |
| 8 | -5.039459000 | 5.539516000  | 3.279179000  | 8 | 6.388599000  | 2.635520000  | 1.557343000  |
| 7 | -4.933166000 | 7.394749000  | 4.596455000  | 7 | 7.188384000  | 3.902187000  | -0.145970000 |
| 1 | -4.346691000 | 8.150735000  | 4.925237000  | 1 | 7.255464000  | 4.833380000  | -0.535898000 |
| 6 | -6.308230000 | 7.335071000  | 5.090506000  | 6 | 7.998898000  | 2.852955000  | -0.756006000 |
| 1 | -6.684139000 | 8.361914000  | 5.141102000  | 1 | 7.710088000  | 1.916072000  | -0.277370000 |
| 1 | -6.896482000 | 6.806976000  | 4.336657000  | 1 | 9.056946000  | 3.030979000  | -0.522343000 |
| 6 | -6.445096000 | 6.676537000  | 6.473775000  | 6 | 7.829007000  | 2.776134000  | -2.281514000 |
| 1 | -5.828740000 | 7.234647000  | 7.189448000  | 1 | 8.579912000  | 2.062235000  | -2.646474000 |
| 1 | -7.486738000 | 6.802708000  | 6.800217000  | 1 | 8.090861000  | 3.744976000  | -2.725232000 |
| 6 | -6.058624000 | 5.190590000  | 6.539395000  | 6 | 6.452307000  | 2.354233000  | -2.757125000 |
| 1 | -6.043830000 | 4.875929000  | 7.590437000  | 6 | 5.925282000  | 1.099891000  | -2.409684000 |
| 1 | -5.039838000 | 5.048946000  | 6.159180000  | 6 | 5.693563000  | 3.186442000  | -3.589994000 |
| 6 | -7.025308000 | 4.276144000  | 5.770654000  | 6 | 4.678625000  | 0.689101000  | -2.881806000 |
| 1 | -8.042007000 | 4.390550000  | 6.161171000  | 6 | 4.448314000  | 2.774366000  | -4.077258000 |
| 1 | -7.060278000 | 4.539750000  | 4.711468000  | 6 | 3.936010000  | 1.523884000  | -3.723310000 |
| 7 | -6.686863000 | 2.856420000  | 5.872591000  | 1 | 6.501509000  | 0.431642000  | -1.773481000 |
| 1 | -6.919180000 | 2.393623000  | 6.741191000  | 1 | 6.089388000  | 4.157808000  | -3.878307000 |
| 6 | -5.873270000 | 2.179949000  | 5.034157000  | 1 | 4.291425000  | -0.288796000 | -2.607289000 |
| 7 | -5.329109000 | 2.763341000  | 3.966738000  | 1 | 3.892564000  | 3.419676000  | -4.753442000 |





|    |              |              |              |   |              |              |              |
|----|--------------|--------------|--------------|---|--------------|--------------|--------------|
| 6  | 4.055314000  | -6.402440000 | -3.976995000 | 6 | -0.353604000 | 4.247022000  | 3.649488000  |
| 6  | 2.969734000  | -5.887887000 | -3.171538000 | 1 | 0.048406000  | 4.393730000  | 2.641550000  |
| 6  | 0.629235000  | -5.147532000 | -2.893087000 | 6 | -1.011571000 | 2.840795000  | 3.667571000  |
| 6  | -0.695190000 | -4.893454000 | -3.413425000 | 1 | -0.197760000 | 2.126006000  | 3.485248000  |
| 6  | -1.429143000 | -4.380336000 | -2.384822000 | 8 | -1.924643000 | 2.809681000  | 2.567074000  |
| 6  | -0.554064000 | -4.324357000 | -1.235941000 | 1 | -2.428786000 | 1.963841000  | 2.586062000  |
| 6  | -0.934266000 | -3.848276000 | 0.016965000  | 6 | -1.696077000 | 2.503075000  | 4.993574000  |
| 6  | 2.864548000  | -4.362587000 | 2.967492000  | 1 | -0.979993000 | 2.533483000  | 5.822186000  |
| 6  | 5.525488000  | -6.034949000 | -0.720831000 | 1 | -2.113209000 | 1.490890000  | 4.958479000  |
| 6  | 1.685799000  | -5.646696000 | -3.647068000 | 1 | -2.513425000 | 3.201071000  | 5.206300000  |
| 1  | -1.956644000 | -3.498834000 | 0.119513000  | 6 | -1.290077000 | 5.439775000  | 3.937954000  |
| 1  | 3.048595000  | -4.172973000 | 4.020618000  | 8 | -0.952608000 | 6.352364000  | 4.696233000  |
| 1  | 6.552606000  | -6.366786000 | -0.838836000 | 7 | -2.459138000 | 5.405456000  | 3.255427000  |
| 1  | 1.494014000  | -5.859068000 | -4.694342000 | 1 | -2.655177000 | 4.558581000  | 2.721072000  |
| 1  | 0.612877000  | -3.250749000 | 4.322576000  | 6 | -3.368587000 | 6.530457000  | 3.177805000  |
| 1  | 5.528137000  | -5.001755000 | 3.779140000  | 1 | -2.960084000 | 7.309811000  | 3.825040000  |
| 1  | 7.023787000  | -5.925017000 | 1.710717000  | 6 | -3.480238000 | 7.064301000  | 1.714027000  |
| 1  | 6.133234000  | -6.858927000 | -3.391709000 | 1 | -4.198309000 | 7.895154000  | 1.716991000  |
| 1  | 3.979864000  | -6.643272000 | -5.030036000 | 1 | -3.927417000 | 6.265654000  | 1.109871000  |
| 1  | -1.003526000 | -5.086485000 | -4.433457000 | 6 | -2.173406000 | 7.494542000  | 1.119849000  |
| 1  | -2.466327000 | -4.068493000 | -2.384767000 | 6 | -1.333147000 | 6.715054000  | 0.350698000  |
| 6  | -1.875478000 | -2.723952000 | 2.807407000  | 7 | -0.208717000 | 7.421891000  | -0.003320000 |
| 6  | -2.046491000 | -1.269186000 | 2.328608000  | 1 | -1.455851000 | 5.688660000  | 0.027614000  |
| 6  | -3.269524000 | -0.558364000 | 2.914988000  | 1 | 0.571951000  | 7.065485000  | -0.574414000 |
| 8  | -3.569340000 | 0.592748000  | 2.397877000  | 6 | -1.519590000 | 8.772770000  | 1.256010000  |
| 8  | -3.894779000 | -1.080154000 | 3.859258000  | 6 | -0.288786000 | 8.683680000  | 0.539397000  |
| 1  | -1.993421000 | -2.742177000 | 3.894931000  | 6 | -1.838612000 | 9.984248000  | 1.899819000  |
| 1  | -2.693402000 | -3.333410000 | 2.401737000  | 6 | 0.616995000  | 9.750882000  | 0.463100000  |
| 1  | -1.159300000 | -0.681449000 | 2.603430000  | 6 | -0.946733000 | 11.048771000 | 1.821050000  |
| 1  | -2.104370000 | -1.216999000 | 1.234742000  | 6 | 0.271195000  | 10.931871000 | 1.113564000  |
| 16 | 1.538390000  | -7.233562000 | 0.195505000  | 1 | -2.769269000 | 10.089835000 | 2.453343000  |
| 1  | 2.744021000  | -7.778512000 | 0.476693000  | 1 | -1.185490000 | 11.987046000 | 2.315662000  |
| 8  | 2.800859000  | -3.358144000 | -0.744008000 | 1 | 0.949349000  | 11.780635000 | 1.076648000  |
| 7  | 2.976062000  | 1.554816000  | 1.501806000  | 1 | 1.554836000  | 9.635137000  | -0.074208000 |
| 1  | 3.926325000  | 1.686032000  | 1.170346000  | 6 | -4.764328000 | 6.105225000  | 3.645513000  |
| 1  | 2.474378000  | 2.410243000  | 1.723386000  | 8 | -5.281549000 | 5.054097000  | 3.231967000  |
| 6  | 2.622025000  | 0.454238000  | 2.220872000  | 7 | -5.403360000 | 6.969595000  | 4.459672000  |
| 8  | 1.549126000  | 0.386539000  | 2.829929000  | 1 | -4.900840000 | 7.789321000  | 4.773981000  |
| 6  | 3.594014000  | -0.723495000 | 2.203631000  | 6 | -6.796432000 | 6.822260000  | 4.879837000  |
| 1  | 3.281525000  | -1.394360000 | 3.005502000  | 1 | -7.237666000 | 7.823681000  | 4.900016000  |
| 1  | 3.465951000  | -1.269465000 | 1.259877000  | 1 | -7.310566000 | 6.254183000  | 4.100959000  |
| 6  | 5.082013000  | -0.360809000 | 2.375739000  | 6 | -6.970229000 | 6.165370000  | 6.259178000  |
| 1  | 5.458279000  | 0.221348000  | 1.530223000  | 1 | -6.429824000 | 6.763709000  | 7.003202000  |
| 1  | 5.653318000  | -1.297023000 | 2.394148000  | 1 | -8.034696000 | 6.231293000  | 6.524239000  |
| 6  | 5.362392000  | 0.347977000  | 3.699468000  | 6 | -6.504406000 | 4.704614000  | 6.364102000  |
| 8  | 5.057267000  | -0.150731000 | 4.784777000  | 1 | -6.577952000 | 4.388482000  | 7.412351000  |
| 7  | 5.991349000  | 1.554947000  | 3.606067000  | 1 | -5.446202000 | 4.622798000  | 6.088355000  |
| 1  | 6.145641000  | 1.969779000  | 2.688029000  | 6 | -7.333118000 | 3.738992000  | 5.502834000  |
| 6  | 6.385605000  | 2.277091000  | 4.800000000  | 1 | -8.394622000 | 3.820214000  | 5.760447000  |
| 1  | 6.798537000  | 1.582045000  | 5.534096000  | 1 | -7.240911000 | 3.982318000  | 4.442755000  |
| 1  | 7.168798000  | 2.992930000  | 4.527953000  | 7 | -6.959383000 | 2.336240000  | 5.683063000  |
| 6  | 5.266373000  | 3.045159000  | 5.523512000  | 1 | -7.291319000 | 1.882829000  | 6.523564000  |
| 8  | 5.291420000  | 3.194410000  | 6.746398000  | 6 | -6.044766000 | 1.654991000  | 4.962159000  |
| 7  | 4.309826000  | 3.583038000  | 4.728463000  | 7 | -5.389550000 | 2.218053000  | 3.944553000  |
| 1  | 4.284627000  | 3.362925000  | 3.738819000  | 1 | -5.382355000 | 3.225029000  | 3.785009000  |
| 6  | 3.109716000  | 4.198289000  | 5.265748000  | 1 | -4.729387000 | 1.639584000  | 3.404159000  |
| 1  | 2.758987000  | 3.588257000  | 6.107348000  | 7 | -5.804019000 | 0.372514000  | 5.262847000  |
| 6  | 3.338352000  | 5.633330000  | 5.828953000  | 1 | -6.416533000 | -0.119603000 | 5.896925000  |
| 1  | 4.087868000  | 5.525035000  | 6.618302000  | 1 | -5.112273000 | -0.177383000 | 4.716023000  |
| 1  | 2.408216000  | 5.953008000  | 6.314515000  | 6 | -7.598912000 | 5.379367000  | -1.308401000 |
| 6  | 3.775867000  | 6.670032000  | 4.819771000  | 1 | -7.827835000 | 6.250662000  | -0.685740000 |
| 6  | 5.137699000  | 6.914457000  | 4.590722000  | 1 | -8.415267000 | 4.656932000  | -1.186556000 |
| 6  | 2.829002000  | 7.413928000  | 4.098121000  | 1 | -7.595695000 | 5.707203000  | -2.355069000 |
| 6  | 5.546100000  | 7.874950000  | 3.661800000  | 6 | -6.249659000 | 4.767630000  | -0.918566000 |
| 6  | 3.233692000  | 8.372178000  | 3.166462000  | 1 | -6.256165000 | 4.479050000  | 0.140937000  |
| 6  | 4.594200000  | 8.606320000  | 2.946812000  | 1 | -5.452309000 | 5.513098000  | -1.030718000 |
| 1  | 5.881502000  | 6.357113000  | 5.154906000  | 6 | -5.898351000 | 3.549588000  | -1.787061000 |
| 1  | 1.768056000  | 7.242673000  | 4.269607000  | 1 | -6.679518000 | 2.782284000  | -1.722692000 |
| 1  | 6.606071000  | 8.056653000  | 3.503279000  | 1 | -5.849645000 | 3.848669000  | -2.838554000 |
| 1  | 2.488073000  | 8.938337000  | 2.614755000  | 7 | -4.601679000 | 2.956627000  | -1.464788000 |
| 1  | 4.908073000  | 9.354236000  | 2.223811000  | 1 | -3.778957000 | 3.316824000  | -1.970983000 |
| 6  | 2.050498000  | 4.156412000  | 4.154631000  | 6 | -4.374031000 | 2.070498000  | -0.490886000 |
| 8  | 2.368667000  | 3.990466000  | 2.970990000  | 7 | -3.125215000 | 1.644956000  | -0.252538000 |
| 7  | 0.771240000  | 4.288906000  | 4.563948000  | 1 | -5.108534000 | 1.016506000  | 1.066985000  |
| 1  | 0.583156000  | 4.556128000  | 5.521220000  | 1 | -6.302576000 | 1.919267000  | 0.200753000  |



|   |              |              |              |   |              |              |              |
|---|--------------|--------------|--------------|---|--------------|--------------|--------------|
| 6 | 6.385330000  | 2.275590000  | 4.803140000  | 1 | -8.395468000 | 3.820634000  | 5.758408000  |
| 1 | 6.794073000  | 1.576739000  | 5.535960000  | 1 | -7.240402000 | 3.983026000  | 4.441842000  |
| 1 | 7.170899000  | 2.991223000  | 4.537490000  | 7 | -6.960365000 | 2.336465000  | 5.681890000  |
| 6 | 5.264799000  | 3.042864000  | 5.525428000  | 1 | -7.291661000 | 1.883773000  | 6.523038000  |
| 8 | 5.288150000  | 3.191128000  | 6.748482000  | 6 | -6.044766000 | 1.654991000  | 4.962159000  |
| 7 | 4.309428000  | 3.581399000  | 4.729523000  | 7 | -5.389304000 | 2.216936000  | 3.944380000  |
| 1 | 4.286199000  | 3.363269000  | 3.739424000  | 1 | -5.383304000 | 3.223617000  | 3.782764000  |
| 6 | 3.109716000  | 4.198289000  | 5.265748000  | 1 | -4.729386000 | 1.637296000  | 3.404852000  |
| 1 | 2.759751000  | 3.590901000  | 6.109494000  | 7 | -5.804140000 | 0.373006000  | 5.265085000  |
| 6 | 3.338766000  | 5.635409000  | 5.823671000  | 1 | -6.417296000 | -0.117821000 | 5.899550000  |
| 1 | 4.089207000  | 5.530242000  | 6.612597000  | 1 | -5.112139000 | -0.178407000 | 4.719928000  |
| 1 | 2.408997000  | 5.956591000  | 6.308949000  | 6 | -7.598912000 | 5.379367000  | -1.308401000 |
| 6 | 3.774830000  | 6.668250000  | 4.809857000  | 1 | -7.823005000 | 6.253291000  | -0.687678000 |
| 6 | 5.136278000  | 6.912880000  | 4.578785000  | 1 | -8.418217000 | 4.660823000  | -1.183382000 |
| 6 | 2.826817000  | 7.407873000  | 4.085311000  | 1 | -7.595829000 | 5.704381000  | -2.355937000 |
| 6 | 5.543175000  | 7.869247000  | 3.644932000  | 6 | -6.251630000 | 4.762766000  | -0.918989000 |
| 6 | 3.229976000  | 8.361859000  | 3.148622000  | 1 | -6.258130000 | 4.476716000  | 0.141219000  |
| 6 | 4.590129000  | 8.596066000  | 2.926811000  | 1 | -5.451367000 | 5.504716000  | -1.033671000 |
| 1 | 5.880989000  | 6.358851000  | 5.145038000  | 6 | -5.906409000 | 3.541252000  | -1.785223000 |
| 1 | 1.766146000  | 7.236398000  | 4.258283000  | 1 | -6.691356000 | 2.777948000  | -1.308401000 |
| 1 | 6.602869000  | 8.051171000  | 3.484834000  | 1 | -5.856591000 | 3.838154000  | -2.837260000 |
| 1 | 2.483485000  | 8.924596000  | 2.594595000  | 7 | -4.612747000 | 2.941943000  | -1.462301000 |
| 1 | 4.902848000  | 9.340786000  | 2.200012000  | 1 | -3.788102000 | 3.293276000  | -1.971586000 |
| 6 | 2.050012000  | 4.154050000  | 4.154996000  | 6 | -4.389955000 | 2.056041000  | -0.487026000 |
| 8 | 2.368869000  | 3.992335000  | 2.970986000  | 7 | -3.144646000 | 1.620006000  | -0.251026000 |
| 7 | 0.770155000  | 4.281117000  | 4.564489000  | 1 | -5.129652000 | 1.013165000  | 1.075520000  |
| 1 | 0.581488000  | 4.543719000  | 5.522912000  | 1 | -6.316988000 | 1.926750000  | 0.213104000  |
| 6 | -0.354599000 | 4.238891000  | 3.649652000  | 7 | -5.398534000 | 1.511293000  | 0.229311000  |
| 1 | 0.048273000  | 4.385372000  | 2.642027000  | 1 | -3.018058000 | 1.112021000  | 0.626787000  |
| 6 | -1.012004000 | 2.832309000  | 3.667474000  | 1 | -2.365226000 | 2.211437000  | -0.570275000 |
| 1 | -0.197620000 | 2.118258000  | 3.484976000  | 6 | -8.716201000 | 6.935027000  | -6.256532000 |
| 8 | -1.924937000 | 2.800536000  | 2.566801000  | 1 | -8.914638000 | 5.989671000  | -6.775021000 |
| 1 | -2.429672000 | 1.955086000  | 2.586095000  | 1 | -9.533311000 | 7.628335000  | -6.489102000 |
| 6 | -1.696372000 | 2.494068000  | 4.993411000  | 1 | -8.737196000 | 6.734718000  | -5.178762000 |
| 1 | -0.980352000 | 2.524822000  | 5.822068000  | 6 | -7.356844000 | 7.521227000  | -6.680304000 |
| 1 | -2.112916000 | 1.481643000  | 4.958334000  | 6 | -6.189459000 | 6.603622000  | -6.378120000 |
| 1 | -2.514129000 | 3.191577000  | 5.206153000  | 6 | -5.541123000 | 6.636791000  | -5.135637000 |
| 6 | -1.291456000 | 5.432152000  | 3.936095000  | 6 | -5.735034000 | 5.667314000  | -7.319519000 |
| 8 | -0.953206000 | 6.347311000  | 4.690842000  | 6 | -4.485829000 | 5.773395000  | -4.833910000 |
| 7 | -2.461814000 | 5.395002000  | 3.255699000  | 6 | -4.684268000 | 4.795923000  | -7.037439000 |
| 1 | -2.656841000 | 4.547071000  | 2.722572000  | 6 | -4.050731000 | 4.839310000  | -5.787385000 |
| 6 | -3.370589000 | 6.520388000  | 3.172910000  | 8 | -3.024955000 | 3.975750000  | -5.549020000 |
| 1 | -2.960619000 | 7.303286000  | 3.814909000  | 1 | -2.722381000 | 4.046999000  | -4.613104000 |
| 6 | -3.484547000 | 7.044931000  | 1.706008000  | 1 | -7.209332000 | 8.482531000  | -6.171101000 |
| 1 | -4.202879000 | 7.875581000  | 1.704772000  | 1 | -7.382425000 | 7.740006000  | -7.755553000 |
| 1 | -3.932542000 | 6.242263000  | 1.107878000  | 1 | -5.857762000 | 7.360947000  | -4.387133000 |
| 6 | -2.178946000 | 7.471700000  | 1.107031000  | 1 | -6.211188000 | 5.620303000  | -8.297089000 |
| 6 | -1.339112000 | 6.687659000  | 0.342052000  | 1 | -3.986125000 | 5.827170000  | -3.870480000 |
| 7 | -0.215871000 | 7.392986000  | -0.018417000 | 1 | -4.339656000 | 4.077536000  | -7.775930000 |
| 1 | -1.461287000 | 5.658933000  | 0.026171000  | 8 | 1.973038000  | 6.276317000  | -1.410721000 |
| 1 | 0.564950000  | 7.031907000  | -0.586577000 | 8 | 3.412951000  | 7.860158000  | -0.742518000 |
| 6 | -1.526104000 | 8.751317000  | 1.233502000  | 6 | 3.080357000  | 6.672741000  | -0.864096000 |
| 6 | -0.296160000 | 8.658376000  | 0.515947000  | 6 | 3.973774000  | 5.562630000  | -0.282648000 |
| 6 | -1.845543000 | 9.966829000  | 1.869463000  | 1 | 3.548756000  | 5.300944000  | 0.698543000  |
| 6 | 0.608581000  | 9.725890000  | 0.431396000  | 1 | 3.882509000  | 4.661193000  | -0.901169000 |
| 6 | -0.954708000 | 11.031557000 | 1.782490000  | 6 | 5.442935000  | 5.958296000  | -0.119766000 |
| 6 | 0.262491000  | 10.910885000 | 1.074357000  | 1 | 5.492160000  | 6.921769000  | 0.395249000  |
| 1 | -2.775646000 | 10.075282000 | 2.423366000  | 1 | 5.893262000  | 6.124172000  | -1.108237000 |
| 1 | -1.193704000 | 11.972957000 | 2.271024000  | 6 | 6.268593000  | 4.935137000  | 0.685735000  |
| 1 | 0.939840000  | 11.759996000 | 1.030911000  | 1 | 5.898770000  | 4.885044000  | 1.713936000  |
| 1 | 1.545820000  | 9.607162000  | -0.106243000 | 1 | 7.315653000  | 5.263633000  | 0.730777000  |
| 6 | -4.766411000 | 6.099485000  | 3.643945000  | 6 | 6.234856000  | 3.511236000  | 0.143536000  |
| 8 | -5.287056000 | 5.049418000  | 3.231919000  | 8 | 5.898868000  | 2.542909000  | 0.852463000  |
| 7 | -5.402057000 | 6.965772000  | 4.458662000  | 7 | 6.604446000  | 3.346367000  | -1.142819000 |
| 1 | -4.897313000 | 7.784702000  | 4.771480000  | 1 | 6.794624000  | 4.168655000  | -1.702654000 |
| 6 | -6.795270000 | 6.822167000  | 4.879915000  | 6 | 6.604180000  | 2.055163000  | -1.822942000 |
| 1 | -7.233743000 | 7.824783000  | 4.900531000  | 1 | 5.598538000  | 1.832373000  | -2.204881000 |
| 1 | -7.311439000 | 6.255586000  | 4.101287000  | 1 | 6.847641000  | 1.289960000  | -1.082442000 |
| 6 | -6.970229000 | 6.165370000  | 6.259178000  | 6 | 7.623730000  | 2.024113000  | -2.975427000 |
| 1 | -6.429673000 | 6.763166000  | 7.003531000  | 1 | 7.594766000  | 1.015730000  | -3.404815000 |
| 1 | -8.034785000 | 6.232185000  | 6.523634000  | 1 | 8.629052000  | 2.170160000  | -2.563572000 |
| 6 | -6.505511000 | 4.704293000  | 6.364067000  | 6 | 7.349648000  | 3.055029000  | -4.052649000 |
| 1 | -6.580174000 | 4.387908000  | 7.412169000  | 6 | 6.344502000  | 2.841983000  | -5.010035000 |
| 1 | -5.447084000 | 4.622010000  | 6.089288000  | 6 | 8.070391000  | 4.257513000  | -4.099874000 |
| 6 | -7.333746000 | 3.739268000  | 5.501684000  | 6 | 6.065648000  | 3.804320000  | -5.981319000 |







|    |              |              |              |   |              |              |              |
|----|--------------|--------------|--------------|---|--------------|--------------|--------------|
| 6  | 3.949364000  | -4.445535000 | 1.914976000  | 1 | 2.816748000  | 9.418435000  | 3.233769000  |
| 6  | 5.128171000  | -4.940544000 | 2.589071000  | 1 | 5.252678000  | 9.903813000  | 3.360256000  |
| 6  | 6.063759000  | -5.172260000 | 1.626434000  | 6 | 2.216431000  | 4.366739000  | 4.244050000  |
| 6  | 5.459897000  | -4.816060000 | 0.362509000  | 8 | 2.659327000  | 4.492096000  | 3.096557000  |
| 6  | 5.517937000  | -4.604571000 | -2.096846000 | 7 | 0.913937000  | 4.171497000  | 4.532638000  |
| 6  | 6.190570000  | -4.718303000 | -3.370227000 | 1 | 0.630669000  | 4.233186000  | 5.501744000  |
| 6  | 5.317344000  | -4.273883000 | -4.317565000 | 6 | -0.129102000 | 4.247243000  | 3.537699000  |
| 6  | 4.109707000  | -3.890430000 | -3.623843000 | 1 | 0.365991000  | 4.402898000  | 2.574659000  |
| 6  | 1.800350000  | -3.004610000 | -3.598768000 | 6 | -0.882883000 | 2.897517000  | 3.442595000  |
| 6  | 0.623295000  | -2.503688000 | -4.269044000 | 1 | -0.100784000 | 2.138264000  | 3.303028000  |
| 6  | -0.330229000 | -2.320489000 | -3.305321000 | 8 | -1.694972000 | 2.976821000  | 2.275410000  |
| 6  | 0.266970000  | -2.705306000 | -2.048849000 | 1 | -2.240297000 | 2.156526000  | 2.196063000  |
| 6  | -0.396696000 | -2.683409000 | -0.822949000 | 6 | -1.705067000 | 2.563204000  | 4.690162000  |
| 6  | 2.756566000  | -4.128475000 | 2.556006000  | 1 | -1.071613000 | 2.501048000  | 5.582462000  |
| 6  | 6.089615000  | -4.933520000 | -0.870940000 | 1 | -2.193400000 | 1.590838000  | 4.568017000  |
| 6  | 2.980646000  | -3.365310000 | -4.243543000 | 1 | -2.484213000 | 3.314972000  | 4.860425000  |
| 1  | -1.432741000 | -2.362352000 | -0.835468000 | 6 | -0.992184000 | 5.493895000  | 3.817455000  |
| 1  | 2.724489000  | -4.248246000 | 3.634403000  | 8 | -0.673913000 | 6.318098000  | 4.679158000  |
| 1  | 7.107703000  | -5.310119000 | -0.879028000 | 7 | -2.072220000 | 5.610766000  | 3.015164000  |
| 1  | 3.016225000  | -3.241886000 | -5.321619000 | 1 | -2.325840000 | 4.798969000  | 2.450604000  |
| 1  | 0.221000000  | -3.460817000 | 3.686305000  | 6 | -2.969592000 | 6.739126000  | 3.083224000  |
| 1  | 5.207924000  | -5.091073000 | 3.658315000  | 1 | -2.664804000 | 7.340098000  | 3.943723000  |
| 1  | 7.071206000  | -5.551778000 | 1.742323000  | 6 | -2.907984000 | 7.609737000  | 1.788304000  |
| 1  | 7.200395000  | -5.085631000 | -3.503226000 | 1 | -3.638223000 | 8.422161000  | 1.891448000  |
| 1  | 5.462846000  | -4.201296000 | -5.388047000 | 1 | -3.256527000 | 6.973785000  | 0.968345000  |
| 1  | 0.539697000  | -2.347378000 | -5.337623000 | 6 | -1.556532000 | 8.155428000  | 1.444727000  |
| 1  | -1.349641000 | -1.975105000 | -3.424693000 | 6 | -0.611045000 | 7.498126000  | 0.687638000  |
| 6  | -1.938254000 | -2.464693000 | 1.917519000  | 7 | 0.505471000  | 8.276662000  | 0.515708000  |
| 6  | -2.013783000 | -0.930701000 | 1.768070000  | 1 | -0.670835000 | 6.507537000  | 0.257396000  |
| 6  | -3.335997000 | -0.297515000 | 2.200134000  | 1 | 1.342386000  | 7.974281000  | -0.008724000 |
| 8  | -3.480613000 | 0.956622000  | 1.929300000  | 6 | -0.982035000 | 9.436231000  | 1.773261000  |
| 8  | -4.180156000 | -0.986636000 | 2.812130000  | 6 | 0.312682000  | 9.471355000  | 1.169176000  |
| 1  | -2.259582000 | -2.737921000 | 2.926756000  | 6 | -1.418238000 | 10.562611000 | 2.497294000  |
| 1  | -2.650609000 | -2.932704000 | 1.226194000  | 6 | 1.160477000  | 10.582252000 | 1.276264000  |
| 1  | -1.222912000 | -0.467989000 | 2.374736000  | 6 | -0.579801000 | 11.667516000 | 2.603502000  |
| 1  | -1.804734000 | -0.621433000 | 0.738051000  | 6 | 0.698267000  | 11.676961000 | 2.000681000  |
| 16 | 1.895227000  | -6.354739000 | -1.133069000 | 1 | -2.397952000 | 10.571283000 | 2.970448000  |
| 1  | 2.874478000  | -6.819817000 | -1.944915000 | 1 | -0.909579000 | 12.540025000 | 3.162045000  |
| 8  | 3.557289000  | -1.828857000 | -0.630924000 | 1 | 1.330612000  | 12.554861000 | 2.105053000  |
| 7  | 3.641738000  | 2.162611000  | 1.612674000  | 1 | 2.142715000  | 10.566866000 | 0.811835000  |
| 1  | 4.621253000  | 2.352220000  | 1.428590000  | 6 | -4.397431000 | 6.219601000  | 3.267769000  |
| 1  | 3.068187000  | 2.981010000  | 1.796006000  | 8 | -4.748585000 | 5.115153000  | 2.821643000  |
| 6  | 3.222984000  | 0.998572000  | 2.186711000  | 7 | -5.246812000 | 7.070499000  | 3.873677000  |
| 8  | 2.069169000  | 0.860204000  | 2.606097000  | 1 | -4.872964000 | 7.924355000  | 4.267012000  |
| 6  | 4.218302000  | -0.155702000 | 2.232078000  | 6 | -6.666918000 | 6.797292000  | 4.064460000  |
| 1  | 3.841987000  | -0.852327000 | 2.985414000  | 1 | -7.189425000 | 7.757875000  | 4.027305000  |
| 1  | 4.178643000  | -0.677588000 | 1.263215000  | 1 | -7.008933000 | 6.205689000  | 3.211825000  |
| 6  | 5.673169000  | 0.223602000  | 2.567667000  | 6 | -6.973028000 | 6.108255000  | 5.400128000  |
| 1  | 6.116466000  | 0.866153000  | 1.800926000  | 1 | -6.472953000 | 6.676010000  | 6.194809000  |
| 1  | 6.265734000  | -0.699210000 | 2.584671000  | 1 | -8.051041000 | 6.215718000  | 5.589809000  |
| 6  | 5.797221000  | 0.851391000  | 3.954423000  | 6 | -6.597553000 | 4.628144000  | 5.532665000  |
| 8  | 5.405415000  | 0.273669000  | 4.970840000  | 1 | -6.705988000 | 4.330647000  | 6.582895000  |
| 7  | 6.374982000  | 2.085746000  | 4.001666000  | 1 | -5.546416000 | 4.470812000  | 5.269647000  |
| 1  | 6.616064000  | 2.558988000  | 3.131657000  | 6 | -7.500848000 | 3.727049000  | 4.680104000  |
| 6  | 6.582792000  | 2.755400000  | 5.270650000  | 1 | -8.547556000 | 3.872492000  | 4.963624000  |
| 1  | 6.969982000  | 2.047952000  | 6.007153000  | 1 | -7.422535000 | 3.977886000  | 3.618128000  |
| 1  | 7.329019000  | 3.544145000  | 5.127124000  | 7 | -7.217654000 | 2.301351000  | 4.826431000  |
| 6  | 5.330905000  | 3.385940000  | 5.905562000  | 1 | -7.683063000 | 1.801805000  | 5.571808000  |
| 8  | 5.201241000  | 3.439281000  | 7.129748000  | 6 | -6.271004000 | 1.641188000  | 4.136076000  |
| 7  | 4.431927000  | 3.915397000  | 5.040265000  | 7 | -5.500212000 | 2.284289000  | 3.243646000  |
| 1  | 4.554064000  | 3.788715000  | 4.042101000  | 1 | -5.360560000 | 3.292268000  | 3.301349000  |
| 6  | 3.125967000  | 4.391246000  | 5.466116000  | 1 | -4.734586000 | 1.744273000  | 2.784620000  |
| 1  | 2.737205000  | 3.684418000  | 6.209198000  | 7 | -6.112513000 | 0.325145000  | 4.305186000  |
| 6  | 3.157152000  | 5.781585000  | 6.171865000  | 1 | -6.819153000 | -0.207133000 | 4.792976000  |
| 1  | 3.735510000  | 5.631888000  | 7.088090000  | 1 | -5.412593000 | -0.189700000 | 3.730450000  |
| 1  | 2.129713000  | 6.020875000  | 6.471472000  | 6 | -7.104658000 | 7.773264000  | -0.293235000 |
| 6  | 3.740844000  | 6.920625000  | 5.369311000  | 1 | -7.117536000 | 8.468754000  | 0.552228000  |
| 6  | 5.113237000  | 7.203937000  | 5.432536000  | 1 | -8.042058000 | 7.203743000  | -0.275462000 |
| 6  | 2.923484000  | 7.730710000  | 4.566918000  | 1 | -7.092433000 | 8.367236000  | -1.214989000 |
| 6  | 5.657923000  | 8.269523000  | 4.712051000  | 6 | -5.881467000 | 6.850113000  | -0.202441000 |
| 6  | 3.464400000  | 8.797357000  | 3.845928000  | 1 | -5.907335000 | 6.296242000  | 0.743228000  |
| 6  | 4.833453000  | 9.070300000  | 3.917476000  | 1 | -4.972563000 | 7.458832000  | -0.178716000 |
| 1  | 5.754356000  | 6.594100000  | 6.064435000  | 6 | -5.743838000 | 5.842944000  | -1.360747000 |
| 1  | 1.855840000  | 7.526851000  | 4.514283000  | 1 | -6.680997000 | 5.296224000  | -1.527140000 |
| 1  | 6.722389000  | 8.479680000  | 4.779689000  | 1 | -5.534821000 | 6.367660000  | -2.296696000 |



|   |              |              |              |   |              |              |              |
|---|--------------|--------------|--------------|---|--------------|--------------|--------------|
| 6 | 5.352363000  | -0.393370000 | 3.445607000  | 6 | -6.255675000 | 6.966723000  | 6.422015000  |
| 1 | 5.739857000  | 0.128480000  | 2.566393000  | 1 | -5.586086000 | 7.537543000  | 7.077216000  |
| 1 | 5.964724000  | -1.294889000 | 3.570345000  | 1 | -7.273909000 | 7.137526000  | 6.798249000  |
| 6 | 5.543401000  | 0.435754000  | 4.714478000  | 6 | -5.907564000 | 5.473927000  | 6.536658000  |
| 8 | 5.196200000  | 0.018944000  | 5.821148000  | 1 | -5.849548000 | 5.206409000  | 7.599146000  |
| 7 | 6.145194000  | 1.648377000  | 4.548007000  | 1 | -4.913247000 | 5.285220000  | 6.114493000  |
| 1 | 6.331299000  | 1.985456000  | 3.604539000  | 6 | -6.938105000 | 4.556393000  | 5.859480000  |
| 6 | 6.466027000  | 2.479640000  | 5.692714000  | 1 | -7.931579000 | 4.726873000  | 6.286943000  |
| 1 | 6.821428000  | 1.852067000  | 6.512390000  | 1 | -7.012271000 | 4.767517000  | 4.790285000  |
| 1 | 7.274290000  | 3.162789000  | 5.410090000  | 7 | -6.647762000 | 3.130809000  | 6.021296000  |
| 6 | 5.313366000  | 3.322031000  | 6.267859000  | 1 | -6.885265000 | 2.715204000  | 6.911837000  |
| 8 | 5.288240000  | 3.620453000  | 7.463184000  | 6 | -5.862440000 | 2.394716000  | 5.207051000  |
| 7 | 4.394532000  | 3.751334000  | 5.370791000  | 7 | -5.317896000 | 2.913646000  | 4.107497000  |
| 1 | 4.410589000  | 3.395715000  | 4.421125000  | 1 | -5.278632000 | 3.917594000  | 3.932202000  |
| 6 | 3.173507000  | 4.433209000  | 5.759574000  | 1 | -4.723957000 | 2.305702000  | 3.518739000  |
| 1 | 2.751525000  | 3.922093000  | 6.634278000  | 7 | -5.640896000 | 1.104564000  | 5.499938000  |
| 6 | 3.391561000  | 5.918528000  | 6.180503000  | 1 | -6.209934000 | 0.643717000  | 6.195439000  |
| 1 | 4.103911000  | 5.888116000  | 7.009932000  | 1 | -5.075560000 | 0.513510000  | 4.862132000  |
| 1 | 2.445094000  | 6.292083000  | 6.590012000  | 6 | -7.301776000 | 6.290840000  | -1.671224000 |
| 6 | 3.883378000  | 6.847057000  | 5.092834000  | 1 | -7.412485000 | 7.251122000  | -1.156649000 |
| 6 | 5.257215000  | 7.042437000  | 4.887512000  | 1 | -8.187837000 | 5.685244000  | -1.444604000 |
| 6 | 2.977559000  | 7.544504000  | 4.277807000  | 1 | -7.299057000 | 6.487894000  | -2.749988000 |
| 6 | 5.716568000  | 7.907535000  | 3.891559000  | 6 | -6.015910000 | 5.581720000  | -1.234899000 |
| 6 | 3.433187000  | 8.407948000  | 3.278603000  | 1 | -6.023908000 | 5.425115000  | -0.147748000 |
| 6 | 4.804878000  | 8.592287000  | 3.083101000  | 1 | -5.144781000 | 6.212734000  | -1.450306000 |
| 1 | 5.970320000  | 6.522342000  | 5.522316000  | 6 | -5.829459000 | 4.233567000  | -1.949257000 |
| 1 | 1.907912000  | 7.416091000  | 4.430694000  | 1 | -6.691166000 | 3.577651000  | -1.773484000 |
| 6 | 6.784886000  | 8.053218000  | 3.753274000  | 1 | -5.782559000 | 4.390873000  | -3.031216000 |
| 1 | 2.718874000  | 8.939725000  | 2.655443000  | 7 | -4.600915000 | 3.536447000  | -1.575912000 |
| 1 | 5.159564000  | 9.269031000  | 2.310414000  | 1 | -3.755262000 | 3.703986000  | -2.150029000 |
| 6 | 2.192475000  | 4.284779000  | 4.587043000  | 6 | -4.456235000 | 2.749881000  | -0.504496000 |
| 8 | 2.579972000  | 3.925205000  | 3.468762000  | 7 | -3.274564000 | 2.187212000  | -0.237976000 |
| 7 | 0.897026000  | 4.546258000  | 4.862070000  | 1 | -5.278352000 | 1.966043000  | 1.167316000  |
| 1 | 0.651586000  | 5.016996000  | 5.724785000  | 1 | -6.338388000 | 2.999595000  | 0.283316000  |
| 6 | -0.126869000 | 4.506301000  | 3.835045000  | 7 | -5.504389000 | 2.433260000  | 0.293259000  |
| 1 | 0.372052000  | 4.623869000  | 2.866891000  | 1 | -3.179931000 | 1.761972000  | 0.686399000  |
| 6 | -0.830528000 | 3.122510000  | 3.802191000  | 1 | -2.426326000 | 2.533229000  | -0.715162000 |
| 1 | -0.029290000 | 2.373426000  | 3.728169000  | 6 | -7.749510000 | -1.148198000 | -3.762518000 |
| 8 | -1.607774000 | 3.103686000  | 2.601562000  | 1 | -7.433598000 | -2.094426000 | -4.216848000 |
| 1 | -2.296630000 | 2.401172000  | 2.654906000  | 1 | -8.792713000 | -1.256613000 | -3.442240000 |
| 6 | -1.664499000 | 2.834662000  | 5.050106000  | 1 | -7.135095000 | -0.985123000 | -2.869331000 |
| 1 | -1.039595000 | 2.882696000  | 5.948281000  | 6 | -7.594765000 | 0.018480000  | -4.755489000 |
| 1 | -2.093395000 | 1.828224000  | 4.999598000  | 6 | -6.168651000 | 0.213821000  | -5.228820000 |
| 1 | -2.487042000 | 3.551111000  | 5.152744000  | 6 | -5.271471000 | 1.020831000  | -4.516019000 |
| 6 | -1.055282000 | 5.723328000  | 4.020447000  | 6 | -5.687735000 | -0.430982000 | -6.378496000 |
| 8 | -0.793829000 | 6.612343000  | 4.837033000  | 6 | -3.945227000 | 1.182741000  | -4.920862000 |
| 7 | -2.117308000 | 5.742834000  | 3.184062000  | 6 | -4.365756000 | -0.287053000 | -6.797473000 |
| 1 | -2.263442000 | 4.904146000  | 2.621246000  | 6 | -3.485913000 | 0.519590000  | -6.065069000 |
| 6 | -2.967576000 | 6.903711000  | 2.998725000  | 8 | -2.201691000 | 0.630830000  | -6.522408000 |
| 1 | -2.483056000 | 7.731057000  | 3.522642000  | 1 | -1.665994000 | 1.135835000  | -5.885102000 |
| 6 | -3.102610000 | 7.241151000  | 1.484868000  | 1 | -7.952985000 | 0.940717000  | -4.279802000 |
| 1 | -3.792285000 | 8.091361000  | 1.394951000  | 1 | -8.247329000 | -0.159331000 | -5.619961000 |
| 1 | -3.592331000 | 6.389781000  | 0.997585000  | 1 | -5.611964000 | 1.540254000  | -3.622703000 |
| 6 | -1.795265000 | 7.545692000  | 0.816208000  | 1 | -6.360633000 | -1.057512000 | -6.960619000 |
| 6 | -1.049297000 | 6.688142000  | 0.033414000  | 1 | -3.279597000 | 1.836416000  | -4.360954000 |
| 7 | 0.110559000  | 7.300510000  | -0.381517000 | 1 | -4.002123000 | -0.789744000 | -7.688988000 |
| 1 | -1.258139000 | 5.666133000  | -0.258009000 | 8 | 2.238273000  | 6.152789000  | -1.913998000 |
| 1 | 0.833641000  | 6.885559000  | -0.984758000 | 8 | 3.771164000  | 7.605035000  | -1.161504000 |
| 6 | -1.042026000 | 8.772959000  | 0.894780000  | 6 | 3.310187000  | 6.457741000  | -1.250681000 |
| 6 | 0.148365000  | 8.576603000  | 0.134185000  | 6 | 3.990004000  | 5.295999000  | -0.499406000 |
| 6 | -1.243916000 | 10.016259000 | 1.525368000  | 1 | 3.218287000  | 4.824290000  | 0.125397000  |
| 6 | 1.129611000  | 9.569084000  | 0.002984000  | 1 | 4.293815000  | 4.527579000  | -1.224313000 |
| 6 | -0.277440000 | 11.007421000 | 1.392067000  | 6 | 5.164872000  | 5.738523000  | 0.378457000  |
| 6 | 0.899883000  | 10.783924000 | 0.642616000  | 1 | 4.871617000  | 6.651452000  | 0.904248000  |
| 1 | -2.142206000 | 10.202641000 | 2.110080000  | 1 | 6.015382000  | 6.039954000  | -0.248551000 |
| 1 | -0.424659000 | 11.969931000 | 1.875656000  | 6 | 5.582143000  | 4.713906000  | 1.445207000  |
| 1 | 1.639065000  | 11.577055000 | 0.563574000  | 1 | 4.711492000  | 4.433024000  | 2.046243000  |
| 1 | 2.036325000  | 9.372629000  | -0.563440000 | 1 | 6.287409000  | 5.190738000  | 2.141702000  |
| 6 | -4.362379000 | 6.643479000  | 3.583867000  | 6 | 6.250664000  | 3.415710000  | 1.013182000  |
| 8 | -5.021420000 | 5.649351000  | 3.238404000  | 8 | 6.126278000  | 2.377426000  | 1.694779000  |
| 7 | -4.830301000 | 7.575384000  | 4.439198000  | 7 | 7.035375000  | 3.456994000  | -0.082864000 |
| 1 | -4.219238000 | 8.339762000  | 4.695520000  | 1 | 7.107248000  | 4.335015000  | -0.579756000 |
| 6 | -6.178629000 | 7.560458000  | 5.004860000  | 6 | 7.899483000  | 2.362829000  | -0.515486000 |
| 1 | -6.535719000 | 8.594931000  | 5.028176000  | 1 | 7.803850000  | 1.576446000  | 0.234180000  |
| 1 | -6.813007000 | 7.009945000  | 4.306348000  | 1 | 8.938287000  | 2.715027000  | -0.501334000 |



|   |              |              |              |                                      |              |              |              |
|---|--------------|--------------|--------------|--------------------------------------|--------------|--------------|--------------|
| 6 | -2.972983000 | 6.920268000  | 2.999456000  | 8                                    | -2.151722000 | 0.605981000  | -6.530022000 |
| 1 | -2.493479000 | 7.750321000  | 3.523726000  | 1                                    | -1.620407000 | 1.111265000  | -5.889064000 |
| 6 | -3.106856000 | 7.255905000  | 1.484989000  | 1                                    | -7.928965000 | 0.965726000  | -4.362516000 |
| 1 | -3.798528000 | 8.104364000  | 1.393506000  | 1                                    | -8.213432000 | -0.141310000 | -5.699080000 |
| 1 | -3.593805000 | 6.402795000  | 0.997878000  | 1                                    | -5.591974000 | 1.552538000  | -3.678026000 |
| 6 | -1.799532000 | 7.562555000  | 0.817296000  | 1                                    | -6.316414000 | -1.055716000 | -7.013117000 |
| 6 | -1.053728000 | 6.706643000  | 0.032637000  | 1                                    | -3.249008000 | 1.829232000  | -4.387472000 |
| 7 | 0.105931000  | 7.319975000  | -0.381470000 | 1                                    | -3.947073000 | -0.807299000 | -7.712901000 |
| 1 | -1.262468000 | 5.685073000  | -0.260420000 | 8                                    | 2.227525000  | 6.175988000  | -1.925404000 |
| 1 | 0.827495000  | 6.907313000  | -0.988008000 | 8                                    | 3.768417000  | 7.613837000  | -1.161993000 |
| 6 | -1.046393000 | 8.789771000  | 0.898121000  | 6                                    | 3.300553000  | 6.470028000  | -1.258903000 |
| 6 | 0.143821000  | 8.594982000  | 0.136786000  | 6                                    | 3.972273000  | 5.299036000  | -0.514326000 |
| 6 | -1.247945000 | 10.031817000 | 1.531287000  | 1                                    | 3.197222000  | 4.830150000  | 0.108535000  |
| 6 | 1.125164000  | 9.587581000  | 0.007433000  | 1                                    | 4.269897000  | 4.532157000  | -1.243373000 |
| 6 | -0.281417000 | 11.023184000 | 1.399732000  | 6                                    | 5.150890000  | 5.727810000  | 0.365231000  |
| 6 | 0.895738000  | 10.801151000 | 0.649589000  | 1                                    | 4.867226000  | 6.644131000  | 0.890335000  |
| 1 | -2.146032000 | 10.217113000 | 2.116652000  | 1                                    | 6.005509000  | 6.019221000  | -0.260891000 |
| 1 | -0.428444000 | 11.984710000 | 1.885334000  | 6                                    | 5.554681000  | 4.698757000  | 1.433168000  |
| 1 | 1.634978000  | 11.594372000 | 0.572029000  | 1                                    | 4.679068000  | 4.424391000  | 2.029776000  |
| 1 | 2.031735000  | 9.392151000  | -0.559594000 | 1                                    | 6.260377000  | 5.170350000  | 2.132888000  |
| 6 | -4.367450000 | 6.653001000  | 3.581936000  | 6                                    | 6.217035000  | 3.396258000  | 1.004191000  |
| 8 | -5.017275000 | 5.650899000  | 3.242082000  | 8                                    | 6.067419000  | 2.353741000  | 1.673990000  |
| 7 | -4.845344000 | 7.587519000  | 4.428736000  | 7                                    | 7.027023000  | 3.439456000  | -0.073577000 |
| 1 | -4.241048000 | 8.358397000  | 4.681613000  | 1                                    | 7.121065000  | 4.322531000  | -0.557778000 |
| 6 | -6.193584000 | 7.563642000  | 4.993825000  | 6                                    | 7.901576000  | 2.346791000  | -0.488810000 |
| 1 | -6.559676000 | 8.595035000  | 5.012311000  | 1                                    | 7.782734000  | 1.554369000  | 0.251365000  |
| 1 | -6.823159000 | 7.004339000  | 4.297942000  | 1                                    | 8.939706000  | 2.698291000  | -0.441180000 |
| 6 | -6.264820000 | 6.975867000  | 6.413580000  | 6                                    | 7.615509000  | 1.822281000  | -1.906930000 |
| 1 | -5.598159000 | 7.554131000  | 7.065249000  | 1                                    | 8.432594000  | 1.131234000  | -2.156428000 |
| 1 | -7.283638000 | 7.141680000  | 6.790556000  | 1                                    | 7.688335000  | 2.652431000  | -2.620538000 |
| 6 | -5.907196000 | 5.485915000  | 6.535086000  | 6                                    | 6.283878000  | 1.117845000  | -2.071542000 |
| 1 | -5.847869000 | 5.223800000  | 7.598858000  | 6                                    | 6.001558000  | -0.055908000 | -1.355043000 |
| 1 | -4.911662000 | 5.301213000  | 6.114068000  | 6                                    | 5.318086000  | 1.598487000  | -2.965097000 |
| 6 | -6.932059000 | 4.559059000  | 5.862074000  | 6                                    | 4.788121000  | -0.724265000 | -1.520618000 |
| 1 | -7.926922000 | 4.726932000  | 6.287373000  | 6                                    | 4.105478000  | 0.924352000  | -3.143571000 |
| 1 | -7.006002000 | 4.763472000  | 4.791553000  | 6                                    | 3.831942000  | -0.237224000 | -2.417677000 |
| 7 | -6.634487000 | 3.136054000  | 6.032877000  | 1                                    | 6.742999000  | -0.457929000 | -0.667639000 |
| 1 | -6.869467000 | 2.725195000  | 6.926285000  | 1                                    | 5.524678000  | 2.497967000  | -3.541113000 |
| 6 | -5.846229000 | 2.398224000  | 5.223116000  | 1                                    | 4.591236000  | -1.634946000 | -0.960963000 |
| 7 | -5.304788000 | 2.912489000  | 4.119554000  | 1                                    | 3.385773000  | 1.294187000  | -3.869968000 |
| 1 | -5.267723000 | 3.915653000  | 3.939459000  | 1                                    | 2.892956000  | -0.767859000 | -2.550798000 |
| 1 | -4.707784000 | 2.303183000  | 3.535544000  | 7                                    | 1.245768000  | 3.850429000  | -2.559739000 |
| 7 | -5.619328000 | 1.110984000  | 5.523931000  | 1                                    | 0.856296000  | 3.393573000  | -1.714887000 |
| 1 | -6.185183000 | 0.652529000  | 6.223596000  | 1                                    | 1.891130000  | 3.198483000  | -3.012515000 |
| 1 | -5.050225000 | 0.518009000  | 4.890984000  | 1                                    | 1.768465000  | 4.765810000  | -2.256227000 |
| 6 | -7.341704000 | 6.238052000  | -1.630839000 | 6                                    | 0.047911000  | 4.161798000  | -3.410569000 |
| 1 | -7.457251000 | 7.197085000  | -1.114991000 | 1                                    | 0.012321000  | 5.249529000  | -3.516806000 |
| 1 | -8.221473000 | 5.625122000  | -1.399436000 | 6                                    | -1.224455000 | 3.741339000  | -2.620405000 |
| 1 | -7.346907000 | 6.435783000  | -2.709470000 | 8                                    | -2.324861000 | 3.949740000  | -3.181978000 |
| 6 | -6.047458000 | 5.539176000  | -1.202446000 | 8                                    | -1.016406000 | 3.243116000  | -1.473926000 |
| 1 | -6.047760000 | 5.381651000  | -0.115417000 | 6                                    | 0.123908000  | 3.545601000  | -4.817019000 |
| 1 | -5.182907000 | 6.177641000  | -1.422395000 | 1                                    | -0.839280000 | 3.774144000  | -5.288755000 |
| 6 | -5.853639000 | 4.193144000  | -1.918909000 | 1                                    | 0.883758000  | 4.084048000  | -5.395435000 |
| 1 | -6.709353000 | 3.530261000  | -1.740058000 | 6                                    | 0.428868000  | 2.067761000  | -4.873655000 |
| 1 | -5.812955000 | 4.351836000  | -3.000929000 | 6                                    | 0.137869000  | 1.082315000  | -3.921940000 |
| 7 | -4.617891000 | 3.505371000  | -1.551950000 | 1                                    | -0.340089000 | 1.179323000  | -2.956792000 |
| 1 | -3.776403000 | 3.680183000  | -2.129985000 | 7                                    | 0.595570000  | -0.133851000 | -4.345829000 |
| 6 | -4.461237000 | 2.721418000  | -0.480233000 | 1                                    | 0.605395000  | -0.992520000 | -3.766869000 |
| 7 | -3.272590000 | 2.171278000  | -0.217649000 | 6                                    | 1.211271000  | 0.016802000  | -5.574874000 |
| 1 | -5.268797000 | 1.932072000  | 1.196216000  | 6                                    | 1.109590000  | 1.400482000  | -5.931159000 |
| 1 | -6.345424000 | 2.948090000  | 0.311095000  | 6                                    | 1.629225000  | 1.827398000  | -7.196973000 |
| 7 | -5.502690000 | 2.394920000  | 0.321930000  | 6                                    | 2.261706000  | 0.943925000  | -8.010326000 |
| 1 | -3.170382000 | 1.747566000  | 0.706674000  | 6                                    | 1.803803000  | -0.933494000 | -6.380823000 |
| 1 | -2.430001000 | 2.531006000  | -0.694675000 | 6                                    | 2.477386000  | -0.481367000 | -7.627154000 |
| 6 | -7.743492000 | -1.120891000 | -3.829426000 | 1                                    | 1.497142000  | 2.858209000  | -7.515939000 |
| 1 | -7.427892000 | -2.071867000 | -4.273957000 | 1                                    | 2.648816000  | 1.260108000  | -8.974208000 |
| 1 | -8.790949000 | -1.221240000 | -3.520556000 | 1                                    | 1.843102000  | -1.984270000 | -6.116340000 |
| 1 | -7.138484000 | -0.955669000 | -2.930226000 | 1                                    | 2.326381000  | -1.178938000 | -8.456958000 |
| 6 | -7.570347000 | 0.038331000  | -4.827929000 | 7                                    | 4.067556000  | -0.727447000 | -7.384533000 |
| 6 | -6.137432000 | 0.222274000  | -5.284805000 | 8                                    | 4.749290000  | 0.203254000  | -6.975279000 |
| 6 | -5.243758000 | 1.026472000  | -4.564503000 | 8                                    | 4.467589000  | -1.872933000 | -7.569060000 |
| 6 | -5.646533000 | -0.431223000 | -6.425346000 |                                      |              |              |              |
| 6 | -3.911417000 | 1.177320000  | -4.953133000 |                                      |              |              |              |
| 6 | -4.318401000 | -0.298218000 | -6.828194000 |                                      |              |              |              |
| 6 | -3.442160000 | 0.505638000  | -6.088348000 |                                      |              |              |              |
|   |              |              |              | <sup>2</sup> TSS <sub>B,C6-exo</sub> |              |              |              |
|   |              |              |              | 26                                   | -0.056698000 | -5.668246000 | -1.671739000 |
|   |              |              |              | 7                                    | -0.250514000 | -4.594484000 | 0.042623000  |

|    |              |              |              |   |              |              |              |
|----|--------------|--------------|--------------|---|--------------|--------------|--------------|
| 7  | 1.871759000  | -6.029668000 | -1.214888000 | 6 | 2.895834000  | 7.302770000  | 4.291171000  |
| 7  | 0.089707000  | -6.864665000 | -3.303427000 | 6 | 5.577551000  | 8.007622000  | 3.969146000  |
| 7  | -2.040994000 | -5.447320000 | -2.032330000 | 6 | 3.238708000  | 8.409339000  | 3.509842000  |
| 6  | -1.395549000 | -4.011059000 | 0.524111000  | 6 | 4.580881000  | 8.765198000  | 3.347407000  |
| 6  | -1.128552000 | -3.329636000 | 1.787398000  | 1 | 6.007887000  | 6.326070000  | 5.247024000  |
| 6  | 0.201838000  | -3.514422000 | 2.028367000  | 1 | 1.848256000  | 7.041129000  | 4.426429000  |
| 6  | 0.736488000  | -4.307207000 | 0.945777000  | 1 | 6.623005000  | 8.283856000  | 3.857112000  |
| 6  | 2.567802000  | -5.566438000 | -0.129724000 | 1 | 2.458597000  | 8.997519000  | 3.033357000  |
| 6  | 3.928747000  | -6.053631000 | -0.166968000 | 1 | 4.846906000  | 9.630908000  | 2.746685000  |
| 6  | 4.041377000  | -6.817311000 | -1.288196000 | 6 | 2.275274000  | 3.960153000  | 4.015702000  |
| 6  | 2.750118000  | -6.797651000 | -1.938419000 | 8 | 2.513976000  | 3.892538000  | 2.805354000  |
| 6  | 1.221861000  | -7.485611000 | -3.755030000 | 7 | 1.023199000  | 3.995159000  | 4.526269000  |
| 6  | 0.946045000  | -8.182302000 | -4.992196000 | 1 | 0.912268000  | 4.214006000  | 5.507829000  |
| 6  | -0.368230000 | -7.965725000 | -5.278713000 | 6 | -0.176615000 | 4.056261000  | 3.713181000  |
| 6  | -0.894489000 | -7.138543000 | -4.215260000 | 1 | 0.143779000  | 4.213947000  | 2.678263000  |
| 6  | -2.739251000 | -5.920223000 | -3.112989000 | 6 | -0.918446000 | 2.693105000  | 3.767022000  |
| 6  | -4.120181000 | -5.497617000 | -3.034521000 | 1 | -0.181576000 | 1.940052000  | 3.452939000  |
| 6  | -4.240731000 | -4.766292000 | -1.891539000 | 8 | -1.982196000 | 2.745105000  | 2.811640000  |
| 6  | -2.931889000 | -4.737740000 | -1.275463000 | 1 | -2.572330000 | 1.953939000  | 2.923830000  |
| 6  | -2.642394000 | -4.075492000 | -0.084336000 | 6 | -1.441216000 | 2.337909000  | 5.159453000  |
| 6  | 2.051795000  | -4.753213000 | 0.874082000  | 1 | -0.621684000 | 2.290012000  | 5.883913000  |
| 6  | 2.460678000  | -7.466957000 | -3.120749000 | 1 | -1.925305000 | 1.355739000  | 5.145423000  |
| 6  | -2.213526000 | -6.703906000 | -4.134460000 | 1 | -2.175913000 | 3.075102000  | 5.501552000  |
| 1  | -3.469055000 | -3.572814000 | 0.407813000  | 6 | -1.001561000 | 5.297250000  | 4.136405000  |
| 1  | 2.725061000  | -4.456693000 | 1.672559000  | 8 | -0.540539000 | 6.123692000  | 4.928409000  |
| 1  | 3.267874000  | -8.023512000 | -3.587638000 | 7 | -2.205664000 | 5.414935000  | 3.531793000  |
| 1  | -2.888594000 | -7.006245000 | -4.929645000 | 1 | -2.548336000 | 4.609540000  | 3.012439000  |
| 1  | 0.777170000  | -3.164514000 | 2.877503000  | 6 | -3.059353000 | 6.578782000  | 3.678964000  |
| 1  | 4.683604000  | -5.826952000 | 0.575441000  | 1 | -2.508233000 | 7.294185000  | 4.293187000  |
| 1  | 4.908492000  | -7.349869000 | -1.658667000 | 6 | -3.393837000 | 7.216999000  | 2.294411000  |
| 1  | 1.674473000  | -8.755423000 | -5.552436000 | 1 | -4.099542000 | 8.039323000  | 2.476051000  |
| 1  | -0.944021000 | -8.324865000 | -6.122839000 | 1 | -3.934510000 | 6.464636000  | 1.707420000  |
| 1  | -4.881984000 | -5.741345000 | -3.764820000 | 6 | -2.198977000 | 7.703501000  | 1.530982000  |
| 1  | -5.122338000 | -4.283054000 | -1.488535000 | 6 | -1.610319000 | 7.073020000  | 0.455966000  |
| 6  | -2.127747000 | -2.619210000 | 2.660250000  | 7 | -0.532076000 | 7.795543000  | 0.002195000  |
| 6  | -2.488935000 | -1.194571000 | 2.202087000  | 1 | -1.877999000 | 6.151285000  | -0.040933000 |
| 6  | -3.399407000 | -0.441330000 | 3.177805000  | 1 | 0.075207000  | 7.518559000  | -0.777596000 |
| 8  | -3.764880000 | 0.749358000  | 2.818579000  | 6 | -1.430637000 | 8.902237000  | 1.762051000  |
| 8  | -3.729321000 | -0.970183000 | 4.257524000  | 6 | -0.390513000 | 8.921725000  | 0.784110000  |
| 1  | -1.726242000 | -2.559792000 | 3.676944000  | 6 | -1.512517000 | 9.964615000  | 2.683034000  |
| 1  | -3.050124000 | -3.208140000 | 2.736289000  | 6 | 0.556566000  | 9.952434000  | 0.717310000  |
| 1  | -1.578169000 | -0.594696000 | 2.070158000  | 6 | -0.578690000 | 10.993441000 | 2.616382000  |
| 1  | -2.974923000 | -1.204363000 | 1.218271000  | 6 | 0.447954000  | 10.984713000 | 1.645656000  |
| 16 | -0.591071000 | -7.722598000 | -0.346712000 | 1 | -2.295992000 | 9.985116000  | 3.437703000  |
| 1  | -1.749134000 | -8.065658000 | -0.955700000 | 1 | -0.635160000 | 11.817339000 | 3.323516000  |
| 8  | 0.264762000  | -4.313309000 | -2.623024000 | 1 | 1.164656000  | 11.801818000 | 1.621192000  |
| 7  | 3.543469000  | 1.782164000  | 1.094965000  | 1 | 1.345652000  | 9.922963000  | -0.029174000 |
| 1  | 4.454232000  | 2.185830000  | 0.889476000  | 6 | -4.375494000 | 6.177584000  | 4.355719000  |
| 1  | 2.811473000  | 2.444407000  | 1.329485000  | 8 | -4.965727000 | 5.137615000  | 4.025883000  |
| 6  | 3.340964000  | 0.487554000  | 1.413396000  | 7 | -4.871026000 | 7.053431000  | 5.254359000  |
| 8  | 2.211217000  | 0.056509000  | 1.708940000  | 1 | -4.315911000 | 7.866241000  | 5.488130000  |
| 6  | 4.528467000  | -0.466205000 | 1.347281000  | 6 | -6.192749000 | 6.929667000  | 5.869022000  |
| 1  | 4.352560000  | -1.225678000 | 2.113858000  | 1 | -6.613672000 | 7.937230000  | 5.943842000  |
| 1  | 4.476502000  | -0.981464000 | 0.379473000  | 1 | -6.818691000 | 6.363501000  | 5.175151000  |
| 6  | 5.925917000  | 0.144532000  | 1.535760000  | 6 | -6.173705000 | 6.282335000  | 7.263623000  |
| 1  | 6.151210000  | 0.890851000  | 0.768537000  | 1 | -5.515184000 | 6.871985000  | 7.913458000  |
| 1  | 6.662580000  | -0.659025000 | 1.415115000  | 1 | -7.184151000 | 6.372221000  | 7.686455000  |
| 6  | 6.128118000  | 0.707282000  | 2.941641000  | 6 | -5.726216000 | 4.812926000  | 7.304098000  |
| 8  | 5.925833000  | 0.027940000  | 3.949226000  | 1 | -5.596729000 | 4.512579000  | 8.351591000  |
| 7  | 6.569390000  | 1.995936000  | 3.009433000  | 1 | -4.746364000 | 4.703669000  | 6.824589000  |
| 1  | 6.633720000  | 2.545315000  | 2.155367000  | 6 | -6.729930000 | 3.855516000  | 6.643332000  |
| 6  | 6.887674000  | 2.604758000  | 4.285738000  | 1 | -7.710021000 | 3.948810000  | 7.123588000  |
| 1  | 7.405570000  | 1.881679000  | 4.919273000  | 1 | -6.868213000 | 4.095631000  | 5.587063000  |
| 1  | 7.563934000  | 3.447860000  | 4.108768000  | 7 | -6.337021000 | 2.449939000  | 6.740491000  |
| 6  | 5.700407000  | 3.122306000  | 5.114452000  | 1 | -6.450767000 | 2.006521000  | 7.642154000  |
| 8  | 5.783027000  | 3.191111000  | 6.342145000  | 6 | -5.627757000 | 1.761925000  | 5.821507000  |
| 7  | 4.620989000  | 3.548377000  | 4.415635000  | 7 | -5.225342000 | 2.323259000  | 4.681400000  |
| 1  | 4.567636000  | 3.391693000  | 3.415708000  | 1 | -5.192568000 | 3.333999000  | 4.553468000  |
| 6  | 3.397137000  | 3.977767000  | 5.065882000  | 1 | -4.730702000 | 1.734919000  | 3.990266000  |
| 1  | 3.144122000  | 3.246472000  | 5.844450000  | 7 | -5.343191000 | 0.472035000  | 6.049652000  |
| 6  | 3.523725000  | 5.353639000  | 5.791477000  | 1 | -5.817116000 | -0.026964000 | 6.788356000  |
| 1  | 4.281470000  | 5.208228000  | 6.565935000  | 1 | -4.768436000 | -0.068002000 | 5.375426000  |
| 1  | 2.575623000  | 5.549340000  | 6.306549000  | 6 | -7.832797000 | 1.803021000  | -3.146806000 |
| 6  | 3.888206000  | 6.535078000  | 4.920804000  | 1 | -8.832799000 | 2.211879000  | -2.967972000 |
| 6  | 5.231230000  | 6.902219000  | 4.749840000  | 1 | -7.857985000 | 0.734986000  | -2.898608000 |





|   |              |              |              |   |              |              |              |
|---|--------------|--------------|--------------|---|--------------|--------------|--------------|
| 1 | 4.220530000  | 1.513159000  | 2.058062000  | 6 | -4.362610000 | 6.643227000  | 3.583677000  |
| 1 | 2.673315000  | 2.177046000  | 2.374001000  | 8 | -5.021899000 | 5.649240000  | 3.238273000  |
| 6 | 2.867308000  | 0.283870000  | 3.063718000  | 7 | -4.830232000 | 7.575163000  | 4.439136000  |
| 8 | 1.734075000  | 0.192353000  | 3.546681000  | 1 | -4.219015000 | 8.339450000  | 4.695361000  |
| 6 | 3.891641000  | -0.836999000 | 3.250346000  | 6 | -6.178535000 | 7.560503000  | 5.004882000  |
| 1 | 3.562212000  | -1.415043000 | 4.116813000  | 1 | -6.535390000 | 8.595056000  | 5.028263000  |
| 1 | 3.832471000  | -1.497123000 | 2.375182000  | 1 | -6.813070000 | 7.010162000  | 4.306377000  |
| 6 | 5.353118000  | -0.393637000 | 3.446428000  | 6 | -6.255675000 | 6.966723000  | 6.422015000  |
| 1 | 5.740468000  | 0.128112000  | 2.567090000  | 1 | -5.586077000 | 7.537473000  | 7.077268000  |
| 1 | 5.965627000  | -1.295037000 | 3.571294000  | 1 | -7.273916000 | 7.137580000  | 6.798204000  |
| 6 | 5.544112000  | 0.435752000  | 4.715131000  | 6 | -5.907652000 | 5.473898000  | 6.536627000  |
| 8 | 5.197206000  | 0.019015000  | 5.821921000  | 1 | -5.849713000 | 5.206348000  | 7.599110000  |
| 7 | 6.145504000  | 1.648532000  | 4.548359000  | 1 | -4.913313000 | 5.285168000  | 6.114521000  |
| 1 | 6.331435000  | 1.985473000  | 3.604804000  | 6 | -6.938174000 | 4.556406000  | 5.859354000  |
| 6 | 6.466304000  | 2.480071000  | 5.692872000  | 1 | -7.931676000 | 4.726908000  | 6.286740000  |
| 1 | 6.821781000  | 1.852690000  | 6.512663000  | 1 | -7.012243000 | 4.767551000  | 4.7920157000 |
| 1 | 7.274510000  | 3.163226000  | 5.410093000  | 7 | -6.647891000 | 3.130804000  | 6.021179000  |
| 6 | 5.313620000  | 3.322512000  | 6.267894000  | 1 | -6.885455000 | 2.715219000  | 6.911714000  |
| 8 | 5.288744000  | 3.621468000  | 7.463093000  | 6 | -5.862440000 | 2.394716000  | 5.207051000  |
| 7 | 4.394499000  | 3.751243000  | 5.370857000  | 7 | -5.317800000 | 2.913614000  | 4.107533000  |
| 1 | 4.410398000  | 3.395212000  | 4.421342000  | 1 | -5.278678000 | 3.917548000  | 3.932114000  |
| 6 | 3.173507000  | 4.433209000  | 5.759574000  | 1 | -4.723755000 | 2.305669000  | 3.518883000  |
| 1 | 2.751562000  | 3.922305000  | 6.634424000  | 7 | -5.640838000 | 1.104587000  | 5.500015000  |
| 6 | 3.391592000  | 5.918629000  | 6.180132000  | 1 | -6.209855000 | 0.643739000  | 6.195532000  |
| 1 | 4.103973000  | 5.888418000  | 7.009539000  | 1 | -5.075378000 | 0.513543000  | 4.862320000  |
| 1 | 2.445147000  | 6.292297000  | 6.589587000  | 6 | -7.301776000 | 6.290840000  | -1.671224000 |
| 6 | 3.883385000  | 6.846874000  | 5.092210000  | 1 | -7.412163000 | 7.251252000  | -1.156823000 |
| 6 | 5.257224000  | 7.042095000  | 4.886743000  | 1 | -8.187988000 | 5.685540000  | -1.444406000 |
| 6 | 2.977567000  | 7.544211000  | 4.277089000  | 1 | -7.299100000 | 6.487684000  | -2.750026000 |
| 6 | 5.716577000  | 7.906919000  | 3.890554000  | 6 | -6.016070000 | 5.581441000  | -1.234884000 |
| 6 | 3.433194000  | 8.407385000  | 3.277649000  | 1 | -6.023992000 | 5.425111000  | -0.147690000 |
| 6 | 4.804885000  | 8.591558000  | 3.082001000  | 1 | -5.144780000 | 6.212147000  | -1.450542000 |
| 1 | 5.970330000  | 6.522096000  | 5.521624000  | 6 | -5.830079000 | 4.233058000  | -1.948941000 |
| 1 | 1.907919000  | 7.415933000  | 4.430087000  | 1 | -6.691825000 | 3.577319000  | -1.772714000 |
| 1 | 6.784897000  | 8.052485000  | 3.752161000  | 1 | -5.783493000 | 4.390094000  | -3.030955000 |
| 1 | 2.718879000  | 8.939075000  | 2.654416000  | 7 | -4.601536000 | 3.535835000  | -1.575791000 |
| 1 | 5.159575000  | 9.268098000  | 2.309137000  | 1 | -3.755943000 | 3.703304000  | -2.350038000 |
| 6 | 2.192378000  | 4.284500000  | 4.587153000  | 6 | -4.456701000 | 2.749424000  | -0.504294000 |
| 8 | 2.579717000  | 3.924244000  | 3.469039000  | 7 | -3.275111000 | 2.186492000  | -0.238030000 |
| 7 | 0.897010000  | 4.546515000  | 4.862063000  | 1 | -5.278442000 | 1.966032000  | 1.167874000  |
| 1 | 0.651664000  | 5.017845000  | 5.724486000  | 1 | -6.338260000 | 3.000217000  | 0.284481000  |
| 6 | -0.126851000 | 4.506322000  | 3.835011000  | 7 | -5.504717000 | 2.433189000  | 0.293844000  |
| 1 | 0.372036000  | 4.623944000  | 2.866841000  | 1 | -3.180214000 | 1.761553000  | 0.686459000  |
| 6 | -0.830263000 | 3.122408000  | 3.802178000  | 1 | -2.426927000 | 2.531633000  | -0.715948000 |
| 1 | -0.028884000 | 2.373460000  | 3.728302000  | 6 | -7.749510000 | -1.148198000 | -3.762518000 |
| 8 | -1.607348000 | 3.103367000  | 2.601449000  | 1 | -7.434715000 | -2.094684000 | -4.217084000 |
| 1 | -2.296325000 | 2.400971000  | 2.654875000  | 1 | -8.792576000 | -1.255744000 | -3.441507000 |
| 6 | -1.664305000 | 2.834499000  | 5.050030000  | 1 | -7.134321000 | -0.985645000 | -2.869769000 |
| 1 | -1.039495000 | 2.882794000  | 5.948257000  | 6 | -7.594513000 | 0.018307000  | -4.755582000 |
| 1 | -2.092957000 | 1.827954000  | 4.999601000  | 6 | -6.168635000 | 0.212552000  | -5.230139000 |
| 1 | -2.487024000 | 3.550767000  | 5.152505000  | 6 | -5.270861000 | 1.021016000  | -4.519740000 |
| 6 | -1.055489000 | 5.723179000  | 4.020352000  | 6 | -5.688619000 | -0.434798000 | -6.378781000 |
| 8 | -0.794182000 | 6.612310000  | 4.836859000  | 6 | -3.944896000 | 1.181932000  | -4.925951000 |
| 7 | -2.117548000 | 5.742401000  | 3.184001000  | 6 | -4.366949000 | -0.291927000 | -6.799044000 |
| 1 | -2.263364000 | 4.903708000  | 2.621108000  | 6 | -3.486498000 | 0.516244000  | -6.069044000 |
| 6 | -2.967852000 | 6.903204000  | 2.998296000  | 8 | -2.202614000 | 0.626345000  | -6.527593000 |
| 1 | -2.483283000 | 7.730783000  | 3.521805000  | 1 | -1.666688000 | 1.133783000  | -5.892429000 |
| 6 | -3.103075000 | 7.239964000  | 1.484310000  | 1 | -7.951563000 | 0.940927000  | -4.279635000 |
| 1 | -3.792623000 | 8.090249000  | 1.394116000  | 1 | -8.247937000 | -0.158900000 | -5.619523000 |
| 1 | -3.593032000 | 6.388452000  | 0.997519000  | 1 | -5.610642000 | 1.542384000  | -3.627286000 |
| 6 | -1.795803000 | 7.543948000  | 0.815259000  | 1 | -6.362031000 | -1.062476000 | -6.959071000 |
| 6 | -1.050253000 | 6.685957000  | 0.032546000  | 1 | -3.278687000 | 1.836789000  | -4.368097000 |
| 7 | 0.109641000  | 7.297897000  | -0.382897000 | 1 | -4.004034000 | -0.796540000 | -7.689766000 |
| 1 | -1.259430000 | 5.663911000  | -0.258499000 | 8 | 2.237046000  | 6.149582000  | -1.915206000 |
| 1 | 0.832540000  | 6.882531000  | -0.986078000 | 8 | 3.770464000  | 7.602211000  | -1.164514000 |
| 6 | -1.042229000 | 8.771045000  | 0.893242000  | 6 | 3.309195000  | 6.454931000  | -1.252459000 |
| 6 | 0.147909000  | 8.574144000  | 0.132391000  | 6 | 3.989021000  | 5.293808000  | -0.500242000 |
| 6 | -1.243640000 | 10.014595000 | 1.523490000  | 1 | 3.217209000  | 4.822117000  | 0.124445000  |
| 6 | 1.129356000  | 9.566349000  | 0.000589000  | 1 | 4.293464000  | 4.525133000  | -1.224625000 |
| 6 | -0.276951000 | 11.005471000 | 1.389618000  | 6 | 5.163355000  | 5.737284000  | 0.377863000  |
| 6 | 0.900106000  | 10.781445000 | 0.639905000  | 1 | 4.869362000  | 6.650112000  | 0.903424000  |
| 1 | -2.141728000 | 10.201387000 | 2.108379000  | 1 | 6.013803000  | 6.039194000  | -0.248993000 |
| 1 | -0.423797000 | 11.968172000 | 1.872942000  | 6 | 5.581088000  | 4.713168000  | 1.444917000  |
| 1 | 1.639455000  | 11.574373000 | 0.560394000  | 1 | 4.710530000  | 4.431903000  | 2.045906000  |
| 1 | 2.035854000  | 9.369515000  | -0.566053000 | 1 | 6.285966000  | 5.190594000  | 2.141396000  |

|   |              |              |              |    |              |              |              |
|---|--------------|--------------|--------------|----|--------------|--------------|--------------|
| 6 | 6.250419000  | 3.415277000  | 1.013235000  | 6  | 2.282684000  | -3.887918000 | 0.596763000  |
| 8 | 6.126529000  | 2.377030000  | 1.694984000  | 6  | 3.256135000  | -5.038749000 | -4.005336000 |
| 7 | 7.035251000  | 3.456831000  | -0.082706000 | 6  | -1.332787000 | -4.042443000 | -5.216454000 |
| 1 | 7.106569000  | 4.334759000  | -0.579839000 | 1  | -3.180072000 | -2.541635000 | -0.086400000 |
| 6 | 7.899483000  | 2.362829000  | -0.515486000 | 1  | 2.853683000  | -3.863875000 | 1.519940000  |
| 1 | 7.804439000  | 1.576589000  | 0.234401000  | 1  | 4.134998000  | -5.378516000 | -4.544574000 |
| 1 | 8.938191000  | 2.715319000  | -0.501914000 | 1  | -1.904525000 | -4.069558000 | -6.138923000 |
| 6 | 7.570808000  | 1.828446000  | -1.920078000 | 1  | 0.777564000  | -2.939686000 | -2.827480000 |
| 1 | 8.368588000  | 1.118782000  | -2.180646000 | 1  | 5.000900000  | -4.703515000 | 0.254539000  |
| 1 | 7.644217000  | 2.648740000  | -2.644936000 | 1  | 5.548998000  | -5.338987000 | -2.327360000 |
| 6 | 6.221288000  | 1.150114000  | -2.051535000 | 1  | 2.773011000  | -5.450336000 | -6.789940000 |
| 6 | 5.896556000  | 0.032413000  | -1.266701000 | 1  | 0.201712000  | -4.901137000 | -7.465242000 |
| 6 | 5.281726000  | 1.596658000  | -2.989927000 | 1  | -4.050692000 | -3.225664000 | -4.870096000 |
| 6 | 4.668270000  | -0.613732000 | -1.410377000 | 1  | -4.592890000 | -2.592840000 | -2.289376000 |
| 6 | 4.054958000  | 0.942993000  | -3.147126000 | 6  | -2.058368000 | -2.137210000 | 2.411142000  |
| 6 | 3.739485000  | -0.162366000 | -2.353516000 | 6  | -2.189144000 | -0.623862000 | 2.135459000  |
| 1 | 6.614843000  | -0.344213000 | -0.541766000 | 6  | -3.276199000 | 0.096321000  | 2.925452000  |
| 1 | 5.520685000  | 2.451457000  | -3.619027000 | 8  | -3.541333000 | 1.300753000  | 2.520075000  |
| 1 | 4.438361000  | -1.481100000 | -0.797091000 | 8  | -3.824495000 | -0.450178000 | 3.901311000  |
| 1 | 3.359095000  | 1.0282185000 | -3.910885000 | 1  | -1.809956000 | -2.292497000 | 3.465751000  |
| 1 | 2.791703000  | -0.680515000 | -2.472470000 | 1  | -3.029758000 | -2.620193000 | 2.247464000  |
| 7 | 1.270439000  | 3.823013000  | -2.569187000 | 1  | -1.234662000 | -0.131371000 | 2.358360000  |
| 1 | 0.878119000  | 3.356125000  | -1.731328000 | 1  | -2.369384000 | -0.453887000 | 1.068617000  |
| 1 | 1.919755000  | 3.178165000  | -3.026714000 | 16 | -0.145878000 | -6.266209000 | -1.940848000 |
| 1 | 1.789740000  | 4.735441000  | -2.252867000 | 1  | -0.820855000 | -6.111752000 | -0.779439000 |
| 6 | 0.075798000  | 4.148372000  | -3.419927000 | 8  | 0.914511000  | -2.304481000 | -2.620371000 |
| 1 | 0.049162000  | 5.236986000  | -3.518885000 | 7  | 3.227289000  | 1.430240000  | 2.362149000  |
| 6 | -1.200901000 | 3.732270000  | -2.634632000 | 1  | 4.198630000  | 1.603701000  | 2.120011000  |
| 8 | -2.298532000 | 3.959003000  | -3.194695000 | 1  | 2.647799000  | 2.261519000  | 2.416943000  |
| 8 | -0.998779000 | 3.218041000  | -1.494269000 | 6  | 2.843312000  | 0.375628000  | 3.125757000  |
| 6 | 0.147633000  | 3.542421000  | -4.830578000 | 8  | 1.706831000  | 0.283966000  | 3.602380000  |
| 1 | -0.809208000 | 3.792231000  | -5.304597000 | 6  | 3.869317000  | -0.740562000 | 3.330743000  |
| 1 | 0.919295000  | 4.072623000  | -5.401194000 | 1  | 3.543728000  | -1.300814000 | 4.210252000  |
| 6 | 0.425910000  | 2.060224000  | -4.901628000 | 1  | 3.804893000  | -1.418722000 | 2.469824000  |
| 6 | 0.139254000  | 1.071787000  | -3.952929000 | 6  | 5.331960000  | -0.295218000 | 3.510992000  |
| 1 | -0.319492000 | 1.169087000  | -2.978373000 | 1  | 5.713846000  | 0.214423000  | 2.622185000  |
| 7 | 0.566446000  | -0.148183000 | -4.393657000 | 1  | 5.945054000  | -1.195284000 | 3.631690000  |
| 1 | 0.577126000  | -1.009200000 | -3.816886000 | 6  | 5.533846000  | 0.549888000  | 4.767918000  |
| 6 | 1.159156000  | 0.002273000  | -5.633193000 | 8  | 5.180965000  | 0.154151000  | 5.880384000  |
| 6 | 1.073518000  | 1.389288000  | -5.979399000 | 7  | 6.155910000  | 1.750006000  | 4.584571000  |
| 6 | 1.565225000  | 1.813943000  | -7.252706000 | 1  | 6.340612000  | 2.072847000  | 3.636426000  |
| 6 | 2.157603000  | 0.913898000  | -8.086879000 | 6  | 6.491315000  | 2.593142000  | 5.716608000  |
| 6 | 1.717300000  | -0.948360000 | -6.467387000 | 1  | 6.834490000  | 1.971338000  | 6.545782000  |
| 6 | 2.370274000  | -0.486945000 | -7.691745000 | 1  | 7.312428000  | 3.256617000  | 5.424209000  |
| 1 | 1.441510000  | 2.847618000  | -7.565279000 | 6  | 5.353935000  | 3.465365000  | 6.278037000  |
| 1 | 2.523715000  | 1.224393000  | -9.060742000 | 8  | 5.330153000  | 3.778235000  | 7.469576000  |
| 1 | 1.741931000  | -2.002423000 | -6.213174000 | 7  | 4.446610000  | 3.901857000  | 5.372518000  |
| 1 | 2.368036000  | -1.211526000 | -8.506203000 | 1  | 4.456442000  | 3.530985000  | 4.428364000  |
| 7 | 4.108630000  | -0.665659000 | -7.354201000 | 6  | 3.231734000  | 4.600520000  | 5.751730000  |
| 8 | 4.716967000  | 0.291214000  | -6.900588000 | 1  | 2.812061000  | 4.112432000  | 6.640526000  |
| 8 | 4.560432000  | -1.792232000 | -7.517134000 | 6  | 3.459804000  | 6.093836000  | 6.135713000  |

<sup>4</sup>Int4<sub>B,C6-exo</sub>

|    |              |              |              |   |              |             |             |
|----|--------------|--------------|--------------|---|--------------|-------------|-------------|
| 26 | 0.496306000  | -3.879921000 | -2.325698000 | 1 | 2.519069000  | 6.480477000 | 6.546293000 |
| 7  | 0.064603000  | -3.500310000 | -0.384773000 | 6 | 3.943218000  | 6.995477000 | 5.021936000 |
| 7  | 2.394625000  | -4.374228000 | -1.806033000 | 6 | 5.315411000  | 7.181317000 | 4.797940000 |
| 7  | 0.878286000  | -4.459031000 | -4.226280000 | 6 | 3.031194000  | 7.677361000 | 4.200641000 |
| 7  | -1.434167000 | -3.531616000 | -2.818316000 | 6 | 5.767143000  | 8.021895000 | 3.777833000 |
| 6  | -1.126881000 | -3.044814000 | 0.118946000  | 6 | 3.479114000  | 8.516333000 | 3.177399000 |
| 6  | -0.998643000 | -2.752923000 | 1.542065000  | 6 | 4.849289000  | 8.691373000 | 2.963527000 |
| 6  | 0.292406000  | -3.050400000 | 1.865034000  | 1 | 6.033396000  | 6.673173000 | 5.436885000 |
| 6  | 0.947367000  | -3.509704000 | 0.662809000  | 1 | 1.962751000  | 7.555682000 | 4.366954000 |
| 6  | 2.947561000  | -4.288453000 | -0.557650000 | 1 | 6.834414000  | 8.160776000 | 3.625257000 |
| 6  | 4.339957000  | -4.680368000 | -0.602936000 | 1 | 2.759994000  | 9.036185000 | 2.549682000 |
| 6  | 4.614518000  | -5.000129000 | -1.897819000 | 1 | 5.198137000  | 9.349397000 | 2.172258000 |
| 6  | 3.390494000  | -4.805537000 | -2.642839000 | 6 | 2.245219000  | 4.427525000 | 4.587328000 |
| 6  | 2.082899000  | -4.872543000 | -4.734151000 | 8 | 2.628414000  | 4.038202000 | 3.477405000 |
| 6  | 1.964064000  | -5.114971000 | -6.153185000 | 7 | 0.950953000  | 4.699116000 | 4.855951000 |
| 6  | 0.672673000  | -4.839004000 | -6.492193000 | 1 | 0.701996000  | 5.190125000 | 5.706284000 |
| 6  | 0.002510000  | -4.426374000 | -5.281145000 | 6 | -0.069881000 | 4.623451000 | 3.828041000 |
| 6  | -1.992349000 | -3.628396000 | -4.066648000 | 1 | 0.429055000  | 4.730655000 | 2.858674000 |
| 6  | -3.386642000 | -3.248494000 | -4.015627000 | 6 | -0.750332000 | 3.227967000 | 3.819020000 |
| 6  | -3.657537000 | -2.927017000 | -2.720633000 | 1 | 0.061818000  | 2.489475000 | 3.763174000 |
| 6  | -2.428019000 | -3.107469000 | -1.980540000 | 8 | -1.520378000 | 3.174514000 | 2.614880000 |
| 6  | -2.294697000 | -2.879796000 | -0.614371000 | 1 | -2.181832000 | 2.446267000 | 2.669369000 |
|    |              |              |              | 6 | -1.584779000 | 2.950572000 | 5.069061000 |

|   |              |              |              |   |              |              |              |
|---|--------------|--------------|--------------|---|--------------|--------------|--------------|
| 1 | -0.964142000 | 3.027779000  | 5.968237000  | 6 | -7.706430000 | -0.147143000 | -4.500855000 |
| 1 | -1.995566000 | 1.935896000  | 5.037490000  | 6 | -6.287366000 | 0.054297000  | -4.993909000 |
| 1 | -2.420123000 | 3.654207000  | 5.154491000  | 6 | -5.386584000 | 0.873887000  | -4.299994000 |
| 6 | -1.018531000 | 5.827274000  | 3.986613000  | 6 | -5.817842000 | -0.592294000 | -6.147487000 |
| 8 | -0.775774000 | 6.736950000  | 4.786581000  | 6 | -4.067985000 | 1.045118000  | -4.725963000 |
| 7 | -2.075799000 | 5.811849000  | 3.144308000  | 6 | -4.503495000 | -0.439277000 | -6.587161000 |
| 1 | -2.204288000 | 4.958916000  | 2.598631000  | 6 | -3.619366000 | 0.378605000  | -5.872404000 |
| 6 | -2.947956000 | 6.951435000  | 2.932417000  | 8 | -2.342608000 | 0.497241000  | -6.348561000 |
| 1 | -2.479355000 | 7.800245000  | 3.436169000  | 1 | -1.799633000 | 1.004106000  | -5.718710000 |
| 6 | -3.091139000 | 7.249796000  | 1.411537000  | 1 | -8.061901000 | 0.774822000  | -4.022456000 |
| 1 | -3.790333000 | 8.090081000  | 1.303224000  | 1 | -8.369141000 | -0.328213000 | -5.356914000 |
| 1 | -3.573173000 | 6.381481000  | 0.947247000  | 1 | -5.718814000 | 1.396591000  | -3.405563000 |
| 6 | -1.789385000 | 7.550190000  | 0.730020000  | 1 | -6.493939000 | -1.227375000 | -6.716493000 |
| 6 | -1.045888000 | 6.682966000  | -0.044306000 | 1 | -3.399793000 | 1.710991000  | -4.183863000 |
| 7 | 0.108474000  | 7.292879000  | -0.477804000 | 1 | -4.149185000 | -0.943897000 | -7.481347000 |
| 1 | -1.252595000 | 5.655377000  | -0.316912000 | 8 | 2.228664000  | 6.143546000  | 6.025040000  |
| 1 | 0.826615000  | 6.872558000  | -1.082900000 | 8 | 3.765619000  | 7.608798000  | -1.307147000 |
| 6 | -1.040383000 | 8.781476000  | 0.783156000  | 6 | 3.299993000  | 6.461280000  | -1.366957000 |
| 6 | 0.144982000  | 8.577424000  | 0.016642000  | 6 | 3.973854000  | 5.317890000  | -0.582204000 |
| 6 | -1.242077000 | 10.034049000 | 1.395185000  | 1 | 3.195866000  | 4.856366000  | 0.042580000  |
| 6 | 1.121198000  | 9.571345000  | -0.138450000 | 1 | 4.290161000  | 4.535695000  | -1.286881000 |
| 6 | -0.280357000 | 11.026455000 | 1.238624000  | 6 | 5.135841000  | 5.785040000  | 0.300316000  |
| 6 | 0.891876000  | 10.795420000 | 0.483503000  | 1 | 4.835355000  | 6.713808000  | 0.793354000  |
| 1 | -2.136590000 | 10.226619000 | 1.983652000  | 1 | 5.995752000  | 6.066875000  | -0.322762000 |
| 1 | -0.427536000 | 11.996045000 | 1.707865000  | 6 | 5.535439000  | 4.794035000  | 1.405227000  |
| 1 | 1.627218000  | 11.590028000 | 0.385698000  | 1 | 4.655190000  | 4.528608000  | 1.998754000  |
| 1 | 2.023994000  | 9.369620000  | -0.709352000 | 1 | 6.226574000  | 5.294608000  | 2.099276000  |
| 6 | -4.335867000 | 6.675857000  | 3.527175000  | 6 | 6.216444000  | 3.486331000  | 1.026061000  |
| 8 | -4.979955000 | 5.666215000  | 3.198301000  | 8 | 6.066106000  | 2.462646000  | 1.724600000  |
| 7 | -4.813762000 | 7.609796000  | 4.374373000  | 7 | 7.041385000  | 3.504229000  | -0.040601000 |
| 1 | -4.213918000 | 8.387239000  | 4.617652000  | 1 | 7.138830000  | 4.374166000  | -0.547558000 |
| 6 | -6.154371000 | 7.574148000  | 4.956569000  | 6 | 7.922642000  | 2.402955000  | -0.415439000 |
| 1 | -6.530972000 | 8.601722000  | 4.975637000  | 1 | 7.770170000  | 1.616754000  | 0.325017000  |
| 1 | -6.786884000 | 7.005472000  | 4.271039000  | 1 | 8.961867000  | 2.744802000  | -0.332027000 |
| 6 | -6.201451000 | 6.991520000  | 6.379413000  | 6 | 7.683501000  | 1.874378000  | -1.840599000 |
| 1 | -5.533605000 | 7.580042000  | 7.020657000  | 1 | 8.500747000  | 1.171999000  | -2.055932000 |
| 1 | -7.217511000 | 7.147736000  | 6.767833000  | 1 | 7.794964000  | 2.699607000  | -2.555064000 |
| 6 | -5.826250000 | 5.506459000  | 6.503254000  | 6 | 6.350644000  | 1.185534000  | -2.058820000 |
| 1 | -5.758255000 | 5.248554000  | 7.567549000  | 6 | 6.007210000  | 0.036600000  | -1.328830000 |
| 1 | -4.830861000 | 5.331567000  | 6.077630000  | 6 | 5.448602000  | 1.652077000  | -3.023953000 |
| 6 | -6.843671000 | 4.565534000  | 5.838695000  | 6 | 4.797156000  | -0.621304000 | -1.552158000 |
| 1 | -7.839002000 | 4.725252000  | 6.265998000  | 6 | 4.240795000  | 0.987271000  | -3.261518000 |
| 1 | -6.922811000 | 4.763049000  | 4.767254000  | 6 | 3.906658000  | -0.149675000 | -2.522036000 |
| 7 | -6.530205000 | 3.147138000  | 6.018194000  | 1 | 6.697598000  | -0.355557000 | -0.584997000 |
| 1 | -6.756798000 | 2.741985000  | 6.916403000  | 1 | 5.702853000  | 2.532605000  | -3.610100000 |
| 6 | -5.723807000 | 2.416234000  | 5.219503000  | 1 | 4.551947000  | -1.512000000 | -0.979472000 |
| 7 | -5.195904000 | 2.926069000  | 4.107216000  | 1 | 3.574887000  | 1.344338000  | -4.043655000 |
| 1 | -5.185128000 | 3.926669000  | 3.910230000  | 1 | 2.971140000  | -0.673367000 | -2.698668000 |
| 1 | -4.581705000 | 2.321249000  | 3.536521000  | 7 | 1.251230000  | 3.806988000  | -2.634687000 |
| 7 | -5.467622000 | 1.139999000  | 5.540540000  | 1 | 0.879128000  | 3.348810000  | -1.782752000 |
| 1 | -6.012189000 | 0.684535000  | 6.258685000  | 1 | 1.891319000  | 3.157945000  | -3.099033000 |
| 1 | -4.884993000 | 0.546909000  | 4.919239000  | 1 | 1.774087000  | 4.723713000  | -2.340666000 |
| 6 | -7.304228000 | 6.217714000  | -1.624516000 | 6 | 0.036563000  | 4.113619000  | -3.463776000 |
| 1 | -7.412096000 | 7.186764000  | -1.126000000 | 1 | -0.000520000 | 5.200586000  | -3.576371000 |
| 1 | -8.186996000 | 5.614698000  | -1.378904000 | 6 | -1.219503000 | 3.697950000  | -2.646432000 |
| 1 | -7.311914000 | 6.395592000  | -2.706575000 | 8 | -2.330493000 | 3.905404000  | -3.187428000 |
| 6 | -6.012808000 | 5.518846000  | -1.188054000 | 8 | -0.989553000 | 3.203055000  | -1.502784000 |
| 1 | -6.008774000 | 5.381697000  | -0.098190000 | 6 | 0.083023000  | 3.486859000  | -4.866926000 |
| 1 | -5.145394000 | 6.147528000  | -1.424379000 | 1 | -0.889851000 | 3.711487000  | -5.320299000 |
| 6 | -5.831066000 | 4.158837000  | -1.880398000 | 1 | 0.830433000  | 4.020907000  | -5.465227000 |
| 1 | -6.684169000 | 3.500440000  | -1.675161000 | 6 | 0.387260000  | 2.008954000  | -4.918142000 |
| 1 | -5.806989000 | 4.296222000  | -2.965875000 | 6 | 0.115001000  | 1.030306000  | -3.954067000 |
| 7 | -4.589822000 | 3.478321000  | -1.519203000 | 1 | -0.343129000 | 1.133926000  | -2.979943000 |
| 1 | -3.755865000 | 3.650405000  | -2.109367000 | 7 | 0.565697000  | -0.189150000 | -4.377893000 |
| 6 | -4.418659000 | 2.699103000  | -0.446632000 | 1 | 0.597667000  | -1.040781000 | -3.788830000 |
| 7 | -3.227259000 | 2.149319000  | -0.197953000 | 6 | 1.160161000  | -0.045564000 | -5.618020000 |
| 1 | -5.205062000 | 1.917390000  | 1.242991000  | 6 | 1.048574000  | 1.335064000  | -5.982913000 |
| 1 | -6.286185000 | 2.940646000  | 0.377433000  | 6 | 1.544174000  | 1.753390000  | -7.261066000 |
| 7 | -5.450815000 | 2.376019000  | 0.370332000  | 6 | 2.164768000  | 0.865411000  | -8.078806000 |
| 1 | -3.109190000 | 1.734370000  | 0.729356000  | 6 | 1.741234000  | -1.000241000 | -6.426924000 |
| 1 | -2.392432000 | 2.501548000  | -0.693768000 | 6 | 2.391960000  | -0.555819000 | -7.687923000 |
| 6 | -7.847385000 | -1.312672000 | -3.503992000 | 1 | 1.403552000  | 2.781337000  | -7.585698000 |
| 1 | -7.534274000 | -2.258926000 | -3.960179000 | 1 | 2.533931000  | 1.174854000  | -9.051885000 |
| 1 | -8.886879000 | -1.422584000 | -3.172535000 | 1 | 1.788065000  | -2.048878000 | -6.155172000 |
| 1 | -7.223792000 | -1.146952000 | -2.617646000 | 1 | 2.230574000  | -1.260881000 | -8.509351000 |

|   |             |              |              |
|---|-------------|--------------|--------------|
| 7 | 3.987444000 | -0.793632000 | -7.469674000 |
| 8 | 4.670265000 | 0.140491000  | -7.069558000 |
| 8 | 4.391098000 | -1.936584000 | -7.661392000 |

<sup>4</sup>TSS<sub>B,C6-exo</sub>

|    |              |              |              |
|----|--------------|--------------|--------------|
| 26 | 0.164887000  | -5.649720000 | -1.597340000 |
| 7  | -0.171690000 | -4.617134000 | 0.124771000  |
| 7  | 2.006215000  | -6.158597000 | -0.922938000 |
| 7  | 0.433199000  | -6.829942000 | -3.223651000 |
| 7  | -1.752178000 | -5.342735000 | -2.146093000 |
| 6  | -1.338216000 | -4.007613000 | 0.510800000  |
| 6  | -1.178639000 | -3.383437000 | 1.820267000  |
| 6  | 0.113727000  | -3.626704000 | 2.184598000  |
| 6  | 0.728571000  | -4.401984000 | 1.132865000  |
| 6  | 2.606983000  | -5.725262000 | 0.228118000  |
| 6  | 3.945075000  | -6.263845000 | 0.320153000  |
| 6  | 4.140980000  | -7.022452000 | -0.793513000 |
| 6  | 2.923954000  | -6.946453000 | -1.569344000 |
| 6  | 1.573757000  | -7.510960000 | -3.557747000 |
| 6  | 1.402100000  | -8.163343000 | -4.836251000 |
| 6  | 0.145497000  | -7.860615000 | -5.266453000 |
| 6  | -0.452710000 | -7.025875000 | -4.249079000 |
| 6  | -2.344365000 | -5.744659000 | -3.317857000 |
| 6  | -3.702199000 | -5.257926000 | -3.375006000 |
| 6  | -3.919618000 | -4.561733000 | -2.223524000 |
| 6  | -2.692601000 | -4.615216000 | -1.464109000 |
| 6  | -2.514481000 | -4.003998000 | -0.226130000 |
| 6  | 2.024065000  | -4.902252000 | 1.186167000  |
| 6  | 2.732538000  | -7.577644000 | -2.792100000 |
| 6  | -1.746764000 | -6.520642000 | -4.303957000 |
| 1  | -3.370564000 | -3.482978000 | 0.190239000  |
| 1  | 2.622785000  | -4.646064000 | 2.054665000  |
| 1  | 3.556654000  | -8.165521000 | -3.184375000 |
| 1  | -2.342159000 | -6.761581000 | -5.179283000 |
| 1  | 0.610234000  | -3.334302000 | 3.102324000  |
| 1  | 4.629532000  | -6.072815000 | 1.137130000  |
| 1  | 5.020438000  | -7.584123000 | -1.082586000 |
| 1  | 2.155825000  | -8.768951000 | -5.323860000 |
| 1  | -0.347945000 | -8.166519000 | -6.180577000 |
| 1  | -4.386219000 | -5.438293000 | -4.194948000 |
| 1  | -4.819023000 | -4.050561000 | -1.903368000 |
| 6  | -2.236090000 | -2.673296000 | 2.621580000  |
| 6  | -2.494036000 | -1.211863000 | 2.210172000  |
| 6  | -3.420335000 | -0.455575000 | 3.169860000  |
| 8  | -3.763341000 | 0.742364000  | 2.814275000  |
| 8  | -3.777836000 | -0.989583000 | 4.238277000  |
| 1  | -1.940172000 | -2.680969000 | 3.675089000  |
| 1  | -3.182802000 | -3.225630000 | 2.572022000  |
| 1  | -1.546133000 | -0.657785000 | 2.167477000  |
| 1  | -2.914860000 | -1.148233000 | 1.199079000  |
| 16 | -0.591071000 | -7.722598000 | -0.346712000 |
| 1  | -1.753867000 | -7.924177000 | -1.007811000 |
| 8  | 0.743233000  | -4.289497000 | -2.426090000 |
| 7  | 3.576731000  | 1.794092000  | 1.109883000  |
| 1  | 4.488018000  | 2.195032000  | 0.902258000  |
| 1  | 2.842593000  | 2.458750000  | 1.330093000  |
| 6  | 3.369716000  | 0.503229000  | 1.440824000  |
| 8  | 2.237788000  | 0.079123000  | 1.737432000  |
| 6  | 4.555189000  | -0.454482000 | 1.388925000  |
| 1  | 4.375766000  | -1.203673000 | 2.164801000  |
| 1  | 4.503888000  | -0.982649000 | 0.427940000  |
| 6  | 5.954883000  | 0.153283000  | 1.572569000  |
| 1  | 6.182772000  | 0.892397000  | 0.799019000  |
| 1  | 6.688405000  | -0.654091000 | 1.458808000  |
| 6  | 6.159086000  | 0.727657000  | 2.973273000  |
| 8  | 5.959778000  | 0.056310000  | 3.986971000  |
| 7  | 6.597394000  | 2.017847000  | 3.030231000  |
| 1  | 6.655715000  | 2.562780000  | 2.172801000  |
| 6  | 6.904637000  | 2.639793000  | 4.302741000  |
| 1  | 7.433603000  | 1.929776000  | 4.941895000  |
| 1  | 7.566791000  | 3.492948000  | 4.120736000  |
| 6  | 5.707236000  | 3.142427000  | 5.125817000  |
| 8  | 5.782249000  | 3.211143000  | 6.354057000  |
| 7  | 4.626667000  | 3.556614000  | 4.421514000  |
| 1  | 4.582142000  | 3.405325000  | 3.420384000  |

|   |              |              |              |
|---|--------------|--------------|--------------|
| 6 | 3.397137000  | 3.977767000  | 5.065882000  |
| 1 | 3.142720000  | 3.242225000  | 5.839935000  |
| 6 | 3.513537000  | 5.351686000  | 5.797996000  |
| 1 | 4.263994000  | 5.205372000  | 6.579216000  |
| 1 | 2.559722000  | 5.543830000  | 6.303637000  |
| 6 | 3.884470000  | 6.536068000  | 4.934163000  |
| 6 | 5.228747000  | 6.904058000  | 4.775095000  |
| 6 | 2.897052000  | 7.305034000  | 4.298404000  |
| 6 | 5.581117000  | 8.011304000  | 3.999781000  |
| 6 | 3.245937000  | 8.413593000  | 3.522589000  |
| 6 | 4.589299000  | 8.770107000  | 3.371774000  |
| 1 | 6.001423000  | 6.326973000  | 5.277368000  |
| 1 | 1.848578000  | 7.042517000  | 4.424555000  |
| 1 | 6.627388000  | 8.287984000  | 3.896782000  |
| 1 | 2.469483000  | 9.002700000  | 3.041284000  |
| 1 | 4.859957000  | 9.637257000  | 2.775198000  |
| 6 | 2.280579000  | 3.963189000  | 4.010807000  |
| 8 | 2.523813000  | 3.914748000  | 2.800685000  |
| 7 | 1.026880000  | 3.980955000  | 4.518801000  |
| 1 | 0.913883000  | 4.184323000  | 5.503410000  |
| 6 | -0.172599000 | 4.047772000  | 3.706020000  |
| 1 | 0.148446000  | 4.207069000  | 2.671560000  |
| 6 | -0.916632000 | 2.685948000  | 3.757918000  |
| 1 | -0.181802000 | 1.932736000  | 3.439407000  |
| 8 | -1.983973000 | 2.741402000  | 2.806884000  |
| 1 | -2.568587000 | 1.945828000  | 2.914922000  |
| 6 | -1.435902000 | 2.327832000  | 5.151045000  |
| 1 | -0.614427000 | 2.273571000  | 5.872820000  |
| 1 | -1.924148000 | 1.347777000  | 5.135005000  |
| 1 | -2.166643000 | 3.066569000  | 5.498266000  |
| 6 | -0.994309000 | 5.290276000  | 4.132503000  |
| 8 | -0.529843000 | 6.114130000  | 4.925067000  |
| 7 | -2.199410000 | 5.413053000  | 3.530504000  |
| 1 | -2.547363000 | 4.609326000  | 3.012260000  |
| 6 | -3.050023000 | 6.578061000  | 3.686403000  |
| 1 | -2.496524000 | 7.287557000  | 4.305328000  |
| 6 | -3.384369000 | 7.228500000  | 2.307357000  |
| 1 | -4.090666000 | 8.048674000  | 2.496355000  |
| 1 | -3.924435000 | 6.481261000  | 1.713272000  |
| 6 | -2.189619000 | 7.723065000  | 1.549196000  |
| 6 | -1.598862000 | 7.102108000  | 0.469768000  |
| 7 | -0.521427000 | 7.829801000  | 0.022887000  |
| 1 | -1.864807000 | 6.183994000  | -0.034838000 |
| 1 | 0.088793000  | 7.558100000  | -0.757140000 |
| 6 | -1.423365000 | 8.921072000  | 1.790705000  |
| 6 | -0.382108000 | 8.949587000  | 0.814104000  |
| 6 | -1.507769000 | 9.976249000  | 2.719698000  |
| 6 | 0.563909000  | 9.981865000  | 0.756668000  |
| 6 | -0.575253000 | 11.006845000 | 2.662067000  |
| 6 | 0.452770000  | 11.006876000 | 1.692741000  |
| 1 | -2.292091000 | 9.989884000  | 3.473675000  |
| 1 | -0.633690000 | 11.825217000 | 3.375445000  |
| 1 | 1.168570000  | 11.824965000 | 1.675666000  |
| 1 | 1.354125000  | 9.958604000  | 0.011144000  |
| 6 | -4.366788000 | 6.176031000  | 4.361045000  |
| 8 | -4.956693000 | 5.136184000  | 4.030081000  |
| 7 | -4.864148000 | 7.052190000  | 5.258429000  |
| 1 | -4.309287000 | 7.864877000  | 5.493246000  |
| 6 | -6.187833000 | 6.929841000  | 5.869057000  |
| 1 | -6.607819000 | 7.937874000  | 5.942779000  |
| 1 | -6.812380000 | 6.364536000  | 5.173226000  |
| 6 | -6.173705000 | 6.282335000  | 7.263623000  |
| 1 | -5.517100000 | 6.871675000  | 7.915669000  |
| 1 | -7.185487000 | 6.372673000  | 7.683141000  |
| 6 | -5.727267000 | 4.812926000  | 7.305298000  |
| 1 | -5.602730000 | 4.511797000  | 8.353165000  |
| 1 | -4.745418000 | 4.703082000  | 6.830030000  |
| 6 | -6.729074000 | 3.857407000  | 6.639340000  |
| 1 | -7.711377000 | 3.951835000  | 7.114863000  |
| 1 | -6.861757000 | 4.098156000  | 5.582516000  |
| 7 | -6.338395000 | 2.451524000  | 6.737898000  |
| 1 | -6.457666000 | 2.007499000  | 7.638550000  |
| 6 | -5.627757000 | 1.761925000  | 5.821507000  |
| 7 | -5.217554000 | 2.321971000  | 4.683674000  |
| 1 | -5.182481000 | 3.332602000  | 4.554956000  |



|    |              |              |              |   |              |              |              |
|----|--------------|--------------|--------------|---|--------------|--------------|--------------|
| 1  | -1.034415000 | -0.209993000 | 1.411804000  | 6 | -0.830346000 | 10.987525000 | 1.618990000  |
| 1  | -2.230991000 | -0.986408000 | 0.400582000  | 6 | 0.283620000  | 10.893602000 | 0.754454000  |
| 16 | 1.088726000  | -7.299701000 | -0.417878000 | 1 | -2.560318000 | 10.008139000 | 2.450054000  |
| 1  | -0.030449000 | -6.868308000 | 0.206966000  | 1 | -0.998177000 | 11.908943000 | 2.171196000  |
| 8  | 1.804546000  | -4.096117000 | -3.102720000 | 1 | 0.954786000  | 11.743170000 | 0.656511000  |
| 7  | 3.784298000  | 1.650693000  | 1.899363000  | 1 | 1.396495000  | 9.635135000  | -0.630805000 |
| 1  | 4.705983000  | 1.970651000  | 1.617179000  | 6 | -4.443559000 | 6.084358000  | 3.780366000  |
| 1  | 3.087974000  | 2.377607000  | 2.030313000  | 8 | -5.049024000 | 5.089543000  | 3.348290000  |
| 6  | 3.592253000  | 0.488366000  | 2.573127000  | 7 | -4.926916000 | 6.869238000  | 4.764594000  |
| 8  | 2.502026000  | 0.190145000  | 3.073142000  | 1 | -4.357423000 | 7.642238000  | 5.083237000  |
| 6  | 4.780866000  | -0.471374000 | 2.640222000  | 6 | -6.239380000 | 6.688220000  | 5.384415000  |
| 1  | 4.576996000  | -1.159580000 | 3.463606000  | 1 | -6.654679000 | 7.684535000  | 5.565801000  |
| 1  | 4.791119000  | -1.058025000 | 1.712699000  | 1 | -6.877229000 | 6.196029000  | 4.646564000  |
| 6  | 6.164561000  | 0.177657000  | 2.829756000  | 6 | -6.205813000 | 5.905210000  | 6.708234000  |
| 1  | 6.440852000  | 0.796570000  | 1.972018000  | 1 | -5.546496000 | 6.431197000  | 7.409776000  |
| 1  | 6.908821000  | -0.625639000 | 2.890934000  | 1 | -7.214421000 | 5.946554000  | 7.142570000  |
| 6  | 6.262608000  | 0.960202000  | 4.137162000  | 6 | -5.750010000 | 4.441637000  | 6.602329000  |
| 8  | 6.026312000  | 0.436381000  | 5.227367000  | 1 | -5.644994000 | 4.031986000  | 7.614815000  |
| 7  | 6.649425000  | 2.263473000  | 4.023462000  | 1 | -4.756744000 | 4.390447000  | 6.141054000  |
| 1  | 6.753313000  | 2.673032000  | 3.096105000  | 6 | -6.728254000 | 3.555108000  | 5.655830000  |
| 6  | 6.865072000  | 3.075077000  | 5.205673000  | 1 | -7.726210000 | 3.605144000  | 6.263609000  |
| 1  | 7.335624000  | 2.469767000  | 5.983006000  | 1 | -6.824376000 | 3.897105000  | 4.783020000  |
| 1  | 7.548628000  | 3.891370000  | 4.948208000  | 7 | -6.345322000 | 2.142793000  | 5.795460000  |
| 6  | 5.612124000  | 3.696573000  | 5.846997000  | 1 | -6.547525000 | 1.605915000  | 6.628250000  |
| 8  | 5.587784000  | 3.954402000  | 7.051977000  | 6 | -5.525253000 | 1.560831000  | 4.895593000  |
| 7  | 4.599056000  | 3.991411000  | 4.999143000  | 7 | -5.037705000 | 2.235316000  | 3.852579000  |
| 1  | 4.640657000  | 3.686507000  | 4.033269000  | 1 | -5.082798000 | 3.252048000  | 3.785886000  |
| 6  | 3.315229000  | 4.496969000  | 5.448766000  | 1 | -4.413496000 | 1.741364000  | 3.194747000  |
| 1  | 2.986450000  | 3.901592000  | 6.309978000  | 7 | -5.212185000 | 0.266210000  | 5.037759000  |
| 6  | 3.363013000  | 5.980536000  | 5.930254000  | 1 | -5.702487000 | -0.300706000 | 5.714049000  |
| 1  | 4.095362000  | 6.002899000  | 6.742102000  | 1 | -4.599422000 | -0.206723000 | 4.345959000  |
| 1  | 2.389170000  | 6.219761000  | 6.374000000  | 6 | -7.818462000 | 5.992639000  | -1.253582000 |
| 6  | 3.712257000  | 7.003960000  | 4.872994000  | 1 | -8.091590000 | 6.832643000  | -0.606269000 |
| 6  | 5.049192000  | 7.354470000  | 4.632889000  | 1 | -8.588568000 | 5.219540000  | -1.142230000 |
| 6  | 2.708056000  | 7.634884000  | 4.121900000  | 1 | -7.848853000 | 6.346814000  | -2.291227000 |
| 6  | 5.377077000  | 8.305604000  | 3.663966000  | 6 | -6.430772000 | 5.452391000  | -0.894194000 |
| 6  | 3.031914000  | 8.585398000  | 3.150627000  | 1 | -6.412624000 | 5.130150000  | 0.155837000  |
| 6  | 4.368379000  | 8.923117000  | 2.918784000  | 1 | -5.680136000 | 6.247160000  | -0.985736000 |
| 1  | 5.836219000  | 6.888881000  | 5.220900000  | 6 | -6.016010000 | 4.282905000  | -1.800218000 |
| 1  | 1.664926000  | 7.385107000  | 4.305122000  | 1 | -6.754438000 | 3.473168000  | -1.754095000 |
| 1  | 6.418091000  | 8.571297000  | 3.498436000  | 1 | -5.989308000 | 4.612137000  | -2.843972000 |
| 1  | 2.242933000  | 9.065841000  | 2.577978000  | 7 | -4.689795000 | 3.747838000  | -1.497841000 |
| 1  | 4.620358000  | 9.667942000  | 2.168681000  | 1 | -3.886650000 | 4.133924000  | -2.025178000 |
| 6  | 2.320904000  | 4.286218000  | 4.297815000  | 6 | -4.433195000 | 2.776523000  | -0.614991000 |
| 8  | 2.707374000  | 4.051187000  | 3.146513000  | 7 | -3.190245000 | 2.318953000  | -0.457932000 |
| 7  | 1.014436000  | 4.361250000  | 4.630591000  | 1 | -5.130194000 | 1.577297000  | 0.851641000  |
| 1  | 0.752471000  | 4.744937000  | 5.531170000  | 1 | -6.307101000 | 2.649355000  | 0.210931000  |
| 6  | -0.039358000 | 4.313060000  | 3.633857000  | 7 | -5.428133000 | 2.170899000  | 0.082718000  |
| 1  | 0.406487000  | 4.567677000  | 2.666041000  | 1 | -3.021416000 | 1.709510000  | 0.347506000  |
| 6  | -0.612381000 | 2.877741000  | 3.489895000  | 1 | -2.402923000 | 2.858343000  | -0.850597000 |
| 1  | 0.253359000  | 2.220670000  | 3.320143000  | 6 | -8.698008000 | 5.859391000  | -6.274444000 |
| 8  | -1.431878000 | 2.899772000  | 2.319522000  | 1 | -9.171688000 | 4.930191000  | -6.611816000 |
| 1  | -2.032833000 | 2.119518000  | 2.309706000  | 1 | -9.444812000 | 6.660548000  | -6.326400000 |
| 6  | -1.364523000 | 2.392632000  | 4.728536000  | 1 | -8.414396000 | 5.726668000  | -5.223652000 |
| 1  | -0.710569000 | 2.412618000  | 5.606884000  | 6 | -7.467569000 | 6.194597000  | -7.137201000 |
| 1  | -1.702402000 | 1.359910000  | 4.590285000  | 6 | -6.407252000 | 5.113082000  | -7.100444000 |
| 1  | -2.243853000 | 3.014895000  | 4.927940000  | 6 | -5.397403000 | 5.117456000  | -6.129576000 |
| 6  | -1.068175000 | 5.413208000  | 3.969849000  | 6 | -6.421759000 | 4.048166000  | -8.014176000 |
| 8  | -0.857741000 | 6.228729000  | 4.873882000  | 6 | -4.438685000 | 4.103195000  | -6.056068000 |
| 7  | -2.157007000 | 5.431382000  | 3.168924000  | 6 | -5.477130000 | 3.025354000  | -7.957656000 |
| 1  | -2.251277000 | 4.655702000  | 2.513656000  | 6 | -4.480666000 | 3.044677000  | -6.973232000 |
| 6  | -3.112072000 | 6.525497000  | 3.157153000  | 8 | -3.579904000 | 2.013883000  | -6.980000000 |
| 1  | -2.665272000 | 7.332377000  | 3.742888000  | 1 | -3.018717000 | 2.041503000  | -6.183624000 |
| 6  | -3.381344000 | 7.011303000  | 1.703178000  | 1 | -7.037339000 | 7.143666000  | -6.792679000 |
| 1  | -4.121248000 | 7.821017000  | 1.761281000  | 1 | -7.791220000 | 6.356857000  | -8.173355000 |
| 1  | -3.864846000 | 6.186953000  | 1.165697000  | 1 | -5.345502000 | 5.937356000  | -5.415685000 |
| 6  | -2.155576000 | 7.460133000  | 0.966236000  | 1 | -7.187435000 | 4.017677000  | -8.786786000 |
| 6  | -1.428696000 | 6.704055000  | 0.070659000  | 1 | -3.665202000 | 4.158510000  | -5.293153000 |
| 7  | -0.354654000 | 7.419356000  | -0.403399000 | 1 | -5.496218000 | 2.205035000  | -8.669312000 |
| 1  | -1.595622000 | 5.691543000  | -0.274375000 | 8 | 1.697927000  | 6.266196000  | -2.065969000 |
| 1  | 0.335944000  | 7.069071000  | -1.079973000 | 8 | 3.078214000  | 7.901304000  | -1.399056000 |
| 6  | -1.482454000 | 8.732076000  | 1.057614000  | 6 | 2.767655000  | 6.703275000  | -1.480091000 |
| 6  | -0.355316000 | 8.665242000  | 0.183945000  | 6 | 3.653879000  | 5.637965000  | -0.804337000 |
| 6  | -1.709639000 | 9.921303000  | 1.777296000  | 1 | 3.002793000  | 5.054423000  | -0.138384000 |
| 6  | 0.536714000  | 9.734390000  | 0.025972000  | 1 | 4.006466000  | 4.930151000  | -1.567563000 |



|   |              |              |              |   |              |              |              |
|---|--------------|--------------|--------------|---|--------------|--------------|--------------|
| 1 | 0.752673000  | 4.745191000  | 5.531211000  | 1 | -6.304137000 | 2.650911000  | 0.208670000  |
| 6 | -0.039287000 | 4.313297000  | 3.634014000  | 7 | -5.424134000 | 2.174106000  | 0.081518000  |
| 1 | 0.406542000  | 4.567723000  | 2.666142000  | 1 | -3.017527000 | 1.714527000  | 0.347225000  |
| 6 | -0.612608000 | 2.878100000  | 3.490262000  | 1 | -2.398846000 | 2.864764000  | -0.849736000 |
| 1 | 0.253009000  | 2.220819000  | 3.320677000  | 6 | -8.698008000 | 5.859391000  | -6.274444000 |
| 8 | -1.432022000 | 2.900163000  | 2.319859000  | 1 | -9.174694000 | 4.929939000  | -6.606851000 |
| 1 | -2.033498000 | 2.120328000  | 2.310256000  | 1 | -9.442159000 | 6.662714000  | -6.330928000 |
| 6 | -1.364950000 | 2.393364000  | 4.728922000  | 1 | -8.415071000 | 5.731453000  | -5.222875000 |
| 1 | -0.711068000 | 2.413323000  | 5.607322000  | 6 | -7.466259000 | 6.185794000  | -7.138693000 |
| 1 | -1.703050000 | 1.360696000  | 4.590802000  | 6 | -6.409450000 | 5.101066000  | -7.095638000 |
| 1 | -2.244151000 | 3.015861000  | 4.928149000  | 6 | -5.399135000 | 5.108197000  | -6.125270000 |
| 6 | -1.067882000 | 5.413632000  | 3.970044000  | 6 | -6.427757000 | 4.030567000  | -8.002766000 |
| 8 | -0.857379000 | 6.228935000  | 4.874262000  | 6 | -4.443665000 | 4.091310000  | -6.045854000 |
| 7 | -2.156608000 | 5.432172000  | 3.169003000  | 6 | -5.486346000 | 3.005131000  | -7.940356000 |
| 1 | -2.251039000 | 4.656601000  | 2.513643000  | 6 | -4.489368000 | 3.027325000  | -6.956487000 |
| 6 | -3.111650000 | 6.526305000  | 3.157552000  | 8 | -3.592004000 | 1.993627000  | -6.957249000 |
| 1 | -2.664912000 | 7.332934000  | 3.743683000  | 1 | -3.028481000 | 2.025831000  | -6.162639000 |
| 6 | -3.380731000 | 7.012723000  | 1.703736000  | 1 | -7.033043000 | 7.135353000  | -6.799311000 |
| 1 | -4.120396000 | 7.822635000  | 1.762121000  | 1 | -7.789120000 | 6.343386000  | -8.175816000 |
| 1 | -3.864469000 | 6.188706000  | 1.165950000  | 1 | -5.344229000 | 5.932355000  | -8.002766000 |
| 6 | -2.154831000 | 7.461399000  | 0.966881000  | 1 | -7.193834000 | 3.997846000  | -8.774888000 |
| 6 | -1.428418000 | 6.705364000  | 0.070895000  | 1 | -3.669721000 | 4.148768000  | -5.283574000 |
| 7 | -0.354166000 | 7.420387000  | -0.403102000 | 1 | -5.508309000 | 2.180558000  | -8.646996000 |
| 1 | -1.595755000 | 5.693096000  | -0.274624000 | 8 | 1.697853000  | 6.267199000  | -2.067604000 |
| 1 | 0.335995000  | 7.070088000  | -1.080088000 | 8 | 3.078115000  | 7.902170000  | -1.400269000 |
| 6 | -1.481190000 | 8.733050000  | 1.058574000  | 6 | 2.767568000  | 6.704144000  | -1.481649000 |
| 6 | -0.354241000 | 8.666090000  | 0.184652000  | 6 | 3.653834000  | 5.638699000  | -0.806091000 |
| 6 | -1.707802000 | 9.922136000  | 1.778668000  | 1 | 3.002702000  | 5.054958000  | -0.140358000 |
| 6 | 0.538129000  | 9.734973000  | 0.026830000  | 1 | 4.006536000  | 4.931084000  | -1.569447000 |
| 6 | -0.828170000 | 10.988103000 | 1.620506000  | 6 | 4.816451000  | 6.233439000  | -0.004227000 |
| 6 | 0.285583000  | 10.894056000 | 0.755714000  | 1 | 4.430891000  | 7.082793000  | 0.566779000  |
| 1 | -2.558316000 | 10.009066000 | 2.451622000  | 1 | 5.561600000  | 6.672170000  | -0.681828000 |
| 1 | -0.995570000 | 11.909411000 | 2.173028000  | 6 | 5.463975000  | 5.269850000  | 1.002505000  |
| 1 | 0.957021000  | 11.743423000 | 0.657885000  | 1 | 4.691768000  | 4.839436000  | 1.648369000  |
| 1 | 1.397735000  | 9.635612000  | -0.630162000 | 1 | 6.123679000  | 5.843458000  | 1.670125000  |
| 6 | -4.443165000 | 6.084806000  | 3.780492000  | 6 | 6.314130000  | 4.109650000  | 0.501234000  |
| 8 | -5.048283000 | 5.089853000  | 3.348256000  | 8 | 6.458158000  | 3.082293000  | 1.194505000  |
| 7 | -4.926874000 | 6.869466000  | 4.764728000  | 7 | 6.960971000  | 4.269843000  | -0.671567000 |
| 1 | -4.357655000 | 7.642622000  | 5.083486000  | 1 | 6.811855000  | 5.131163000  | -1.180082000 |
| 6 | -6.239395000 | 6.688075000  | 5.384321000  | 6 | 7.967893000  | 3.349588000  | -1.191747000 |
| 1 | -6.655062000 | 7.684269000  | 5.565534000  | 1 | 8.225967000  | 2.666905000  | -0.380217000 |
| 1 | -6.876934000 | 6.195600000  | 4.646392000  | 1 | 8.859155000  | 3.935693000  | -1.443772000 |
| 6 | -6.205813000 | 5.905210000  | 6.708234000  | 6 | 7.515447000  | 2.558053000  | -2.437418000 |
| 1 | -5.546657000 | 6.431409000  | 7.409768000  | 1 | 8.413068000  | 2.087816000  | -2.858506000 |
| 1 | -7.214463000 | 5.946417000  | 7.142471000  | 1 | 7.147869000  | 3.265077000  | -3.191640000 |
| 6 | -5.749727000 | 4.441714000  | 6.602526000  | 6 | 6.470923000  | 1.499253000  | -2.156464000 |
| 1 | -5.644337000 | 4.032281000  | 7.615059000  | 6 | 6.854486000  | 0.225419000  | -1.709330000 |
| 1 | -4.756585000 | 4.390633000  | 6.140971000  | 6 | 5.104185000  | 1.762804000  | -2.320999000 |
| 6 | -6.728067000 | 3.554868000  | 5.816328000  | 6 | 5.901055000  | -0.756452000 | -1.432023000 |
| 1 | -7.725833000 | 3.604691000  | 6.264740000  | 6 | 4.145899000  | 0.785480000  | -2.039863000 |
| 1 | -6.824782000 | 3.896767000  | 4.783720000  | 6 | 4.540577000  | -0.478667000 | -1.595514000 |
| 7 | -6.344818000 | 2.142649000  | 5.796011000  | 1 | 7.911717000  | -0.001804000 | -1.587624000 |
| 1 | -6.546719000 | 1.605624000  | 6.628779000  | 1 | 4.789141000  | 2.739155000  | -2.682801000 |
| 6 | -5.525253000 | 1.560831000  | 4.895593000  | 1 | 6.216470000  | -1.742960000 | -1.102072000 |
| 7 | -5.038080000 | 2.235663000  | 3.852674000  | 1 | 3.091039000  | 1.002555000  | -2.181346000 |
| 1 | -5.083024000 | 3.252431000  | 3.786408000  | 1 | 3.797923000  | -1.243604000 | -1.386397000 |
| 1 | -4.414458000 | 1.741943000  | 3.194111000  | 7 | 1.005081000  | 3.910363000  | -2.951925000 |
| 7 | -5.212157000 | 0.266144000  | 5.037410000  | 1 | 0.723491000  | 3.305761000  | -2.167910000 |
| 1 | -5.703743000 | -0.301173000 | 5.712448000  | 1 | 1.725975000  | 3.454878000  | -3.514688000 |
| 1 | -4.601459000 | -0.206930000 | 4.343900000  | 1 | 1.403786000  | 4.836291000  | -2.516265000 |
| 6 | -7.818462000 | 5.992639000  | -1.253582000 | 6 | -0.240395000 | 4.220142000  | -3.728544000 |
| 1 | -8.093155000 | 6.831781000  | -0.605811000 | 1 | -0.093341000 | 5.203186000  | -4.181767000 |
| 1 | -8.587351000 | 5.218223000  | -1.142971000 | 6 | -1.406522000 | 4.269860000  | -2.710685000 |
| 1 | -7.849120000 | 6.347444000  | -2.291005000 | 8 | -2.519341000 | 4.662801000  | -3.138617000 |
| 6 | -6.430039000 | 5.454393000  | -0.894135000 | 8 | -1.131491000 | 3.846845000  | -1.551225000 |
| 1 | -6.411696000 | 5.131482000  | 0.155686000  | 6 | -0.536852000 | 3.181685000  | -4.838686000 |
| 1 | -5.680637000 | 6.250411000  | -0.984925000 | 1 | -1.272928000 | 3.656321000  | -5.494926000 |
| 6 | -6.013242000 | 4.286165000  | -1.800813000 | 1 | 0.362897000  | 3.047597000  | -5.452285000 |
| 1 | -6.750685000 | 3.475466000  | -1.755777000 | 6 | -1.048407000 | 1.846513000  | -4.354995000 |
| 1 | -5.986301000 | 4.616152000  | -2.844312000 | 6 | -2.336535000 | 1.572507000  | -3.936183000 |
| 7 | -4.686573000 | 3.752522000  | -1.497954000 | 1 | -3.187232000 | 2.232458000  | -3.846936000 |
| 1 | -3.883541000 | 4.139410000  | -2.024891000 | 7 | -2.424675000 | 0.268811000  | -3.502080000 |
| 6 | -4.429499000 | 2.781217000  | -0.615203000 | 1 | -3.255667000 | -0.158181000 | -3.120862000 |
| 7 | -3.186107000 | 2.325192000  | -0.457235000 | 6 | -1.193099000 | -0.335494000 | -3.613995000 |
| 1 | -5.126033000 | 1.580376000  | 0.850338000  | 6 | -0.295128000 | 0.628114000  | -4.159426000 |



|                                         |              |              |              |   |              |              |              |
|-----------------------------------------|--------------|--------------|--------------|---|--------------|--------------|--------------|
| 6                                       | 1.045503000  | 0.255068000  | -4.382861000 | 1 | 6.708779000  | 2.640316000  | 3.012226000  |
| 6                                       | 1.459919000  | -1.031961000 | -4.041871000 | 6 | 6.873616000  | 3.076206000  | 5.112846000  |
| 6                                       | -0.793001000 | -1.638456000 | -3.269881000 | 1 | 7.368544000  | 2.482848000  | 5.884235000  |
| 6                                       | 0.535249000  | -1.927636000 | -3.488274000 | 1 | 7.547504000  | 3.889215000  | 4.821895000  |
| 1                                       | 1.756074000  | 0.954712000  | -4.818227000 | 6 | 5.638568000  | 3.704218000  | 5.783104000  |
| 1                                       | 2.490354000  | -1.335596000 | -4.201744000 | 8 | 5.640374000  | 3.960194000  | 6.988646000  |
| 1                                       | -1.487575000 | -2.356380000 | -2.843373000 | 7 | 4.610671000  | 4.006324000  | 4.955990000  |
| 1                                       | 1.125054000  | -3.275363000 | -3.160210000 | 1 | 4.632792000  | 3.702494000  | 3.989139000  |
| 7                                       | 2.658992000  | -4.262398000 | -5.572746000 | 6 | 3.334648000  | 4.511934000  | 5.427748000  |
| 8                                       | 3.694875000  | -3.648810000 | -5.503626000 | 1 | 3.017790000  | 3.914277000  | 6.291825000  |
| 8                                       | 1.663030000  | -4.091583000 | -6.228898000 | 6 | 3.390554000  | 5.994355000  | 5.911117000  |
| <b><sup>4</sup>Int6<sub>B,HAT</sub></b> |              |              |              |   |              |              |              |
| 26                                      | 1.685610000  | -5.338835000 | -1.647222000 | 1 | 4.139054000  | 6.016274000  | 6.708141000  |
| 7                                       | 1.074207000  | -4.153709000 | -0.123252000 | 1 | 2.425488000  | 6.231632000  | 6.374778000  |
| 7                                       | 3.552970000  | -5.448039000 | -0.873984000 | 6 | 3.717035000  | 7.019406000  | 4.848080000  |
| 7                                       | 2.276997000  | -6.569662000 | -3.145388000 | 6 | 5.048333000  | 7.372259000  | 4.581597000  |
| 7                                       | -0.179479000 | -5.223228000 | -2.422664000 | 6 | 2.697059000  | 7.648176000  | 4.116667000  |
| 6                                       | -0.190304000 | -3.688459000 | 0.136412000  | 6 | 5.355240000  | 8.323621000  | 3.606085000  |
| 6                                       | -0.206856000 | -2.918000000 | 1.374902000  | 6 | 3.000009000  | 8.598689000  | 3.138698000  |
| 6                                       | 1.083892000  | -2.907702000 | 1.818376000  | 6 | 4.330979000  | 8.938879000  | 2.880536000  |
| 6                                       | 1.869520000  | -3.688810000 | 0.890181000  | 1 | 5.847639000  | 6.908039000  | 5.153901000  |
| 6                                       | 3.997705000  | -4.780857000 | 0.233519000  | 1 | 1.658221000  | 7.395747000  | 4.319543000  |
| 6                                       | 5.399649000  | -5.068890000 | 0.459950000  | 1 | 6.392300000  | 8.590912000  | 3.419669000  |
| 6                                       | 5.786568000  | -5.925708000 | -0.525504000 | 1 | 2.199062000  | 9.076858000  | 2.580934000  |
| 6                                       | 4.623398000  | -6.153045000 | -1.357009000 | 1 | 4.566821000  | 9.683343000  | 2.124865000  |
| 6                                       | 3.507635000  | -7.140031000 | -3.325205000 | 6 | 2.325654000  | 4.304423000  | 4.288951000  |
| 6                                       | 3.515145000  | -7.938932000 | -4.531812000 | 8 | 2.699350000  | 4.072271000  | 3.132717000  |
| 6                                       | 2.273388000  | -7.827759000 | -5.080723000 | 7 | 1.022807000  | 4.378393000  | 4.634748000  |
| 6                                       | 1.507473000  | -6.966201000 | -4.205072000 | 1 | 0.767453000  | 4.758422000  | 5.538655000  |
| 6                                       | -0.598133000 | -5.807410000 | -3.592105000 | 6 | -0.037472000 | 4.323373000  | 3.645443000  |
| 6                                       | -1.997504000 | -5.520058000 | -3.814832000 | 1 | 0.400706000  | 4.581655000  | 2.675109000  |
| 6                                       | -2.420562000 | -4.776155000 | -2.752267000 | 6 | -0.600471000 | 2.884036000  | 3.502770000  |
| 6                                       | -1.275354000 | -4.599366000 | -1.887225000 | 1 | 0.269084000  | 2.231745000  | 3.335858000  |
| 6                                       | -1.294799000 | -3.902235000 | -0.679720000 | 8 | -1.418230000 | 2.900512000  | 2.330767000  |
| 6                                       | 3.225270000  | -3.959076000 | 1.051094000  | 1 | -2.007411000 | 2.110852000  | 2.312329000  |
| 6                                       | 4.606582000  | -6.961530000 | -2.488764000 | 6 | -1.351017000 | 2.396546000  | 4.741505000  |
| 6                                       | 0.180030000  | -6.606840000 | -4.424779000 | 1 | -0.698692000 | 2.424810000  | 5.620937000  |
| 1                                       | -2.245874000 | -3.481779000 | -0.367986000 | 1 | -1.679024000 | 1.360351000  | 4.606263000  |
| 1                                       | 3.717875000  | -3.513520000 | 1.910166000  | 1 | -2.236300000 | 3.011189000  | 4.937763000  |
| 1                                       | 5.527552000  | -7.471815000 | -2.755138000 | 6 | -1.072786000 | 5.414785000  | 3.986318000  |
| 1                                       | -0.298454000 | -7.003330000 | -5.315752000 | 8 | -0.864452000 | 6.235574000  | 4.885892000  |
| 1                                       | 1.479318000  | -2.408415000 | 2.695301000  | 7 | -2.166666000 | 5.419524000  | 3.191712000  |
| 1                                       | 5.988943000  | -4.664722000 | 1.273927000  | 1 | -2.253590000 | 4.642855000  | 2.536241000  |
| 1                                       | 6.761005000  | -6.368308000 | -0.691957000 | 6 | -3.128501000 | 6.507834000  | 3.175373000  |
| 1                                       | 4.368047000  | -8.497346000 | -4.897669000 | 1 | -2.680258000 | 7.325776000  | 3.744514000  |
| 1                                       | 1.894884000  | -8.276145000 | -5.991151000 | 6 | -3.413685000 | 6.970158000  | 1.717450000  |
| 1                                       | -2.569223000 | -5.861494000 | -4.669096000 | 1 | -4.162537000 | 7.772076000  | 1.768908000  |
| 1                                       | -3.410177000 | -4.381720000 | -2.556134000 | 1 | -3.890874000 | 6.133403000  | 1.193829000  |
| 6                                       | -1.412636000 | -2.314503000 | 2.039514000  | 6 | -2.196552000 | 7.425075000  | 0.969674000  |
| 6                                       | -1.823243000 | -0.928109000 | 1.512648000  | 6 | -1.462777000 | 6.672676000  | 0.076248000  |
| 6                                       | -3.007036000 | -0.323048000 | 2.272242000  | 7 | -0.397623000 | 7.397936000  | -0.403314000 |
| 8                                       | -3.304061000 | 0.908326000  | 1.995753000  | 1 | -1.618433000 | 5.656410000  | -0.262898000 |
| 8                                       | -3.615512000 | -1.012695000 | 3.113774000  | 1 | 0.298410000  | 7.055199000  | -1.078527000 |
| 1                                       | -1.212430000 | -2.225509000 | 3.112624000  | 6 | -1.537075000 | 8.704728000  | 1.053517000  |
| 1                                       | -2.271364000 | -2.989781000 | 1.951264000  | 6 | -0.410904000 | 8.646129000  | 0.178587000  |
| 1                                       | -0.982261000 | -0.226217000 | 1.578368000  | 6 | -1.775851000 | 9.894458000  | 1.768716000  |
| 1                                       | -2.088491000 | -0.972235000 | 0.447511000  | 6 | 0.470087000  | 9.723693000  | 0.014985000  |
| 16                                      | 1.031873000  | -7.304887000 | -0.370004000 | 6 | -0.907803000 | 10.968945000 | 1.604941000  |
| 1                                       | -0.195443000 | -6.890864000 | 0.019143000  | 6 | 0.206049000  | 10.882951000 | 0.739354000  |
| 8                                       | 2.234694000  | -3.869317000 | -2.635020000 | 1 | -2.626582000 | 9.975382000  | 2.442114000  |
| 7                                       | 3.695212000  | 1.641138000  | 1.871932000  | 1 | -1.084385000 | 11.890825000 | 2.153612000  |
| 1                                       | 4.617808000  | 1.932889000  | 1.563638000  | 1 | 0.868485000  | 11.738865000 | 0.637425000  |
| 1                                       | 3.025945000  | 2.392099000  | 2.009564000  | 1 | 1.330687000  | 9.630797000  | -0.641741000 |
| 6                                       | 3.502638000  | 0.516358000  | 2.609503000  | 6 | -4.449650000 | 6.067465000  | 3.821398000  |
| 8                                       | 2.427864000  | 0.271786000  | 3.167210000  | 8 | -5.071906000 | 5.083385000  | 3.388344000  |
| 6                                       | 4.667453000  | -0.472269000 | 2.671989000  | 7 | -4.903094000 | 6.838342000  | 4.830664000  |
| 1                                       | 4.471761000  | -1.126661000 | 3.524421000  | 1 | -4.320062000 | 7.601699000  | 5.148075000  |
| 1                                       | 4.634595000  | -1.091427000 | 1.766395000  | 6 | -6.201253000 | 6.656070000  | 5.479891000  |
| 6                                       | 6.070482000  | 0.148673000  | 2.805620000  | 1 | -6.603303000 | 7.652318000  | 5.689335000  |
| 1                                       | 6.335433000  | 0.744891000  | 1.928320000  | 1 | -6.861609000 | 6.183201000  | 4.749268000  |
| 1                                       | 6.798578000  | -0.669590000 | 2.861661000  | 6 | -6.144491000 | 5.848689000  | 6.788353000  |
| 6                                       | 6.220224000  | 0.952687000  | 4.095170000  | 1 | -5.468163000 | 6.358021000  | 7.485990000  |
| 8                                       | 6.006482000  | 0.451281000  | 5.200674000  | 1 | -7.144033000 | 5.887538000  | 7.243308000  |
| 7                                       | 6.621680000  | 2.247987000  | 3.949007000  | 6 | -5.699796000 | 4.385039000  | 6.646115000  |
|                                         |              |              |              | 1 | -5.588103000 | 3.952456000  | 7.648272000  |
|                                         |              |              |              | 1 | -4.711289000 | 4.337174000  | 6.174280000  |

|   |              |              |              |   |              |              |              |
|---|--------------|--------------|--------------|---|--------------|--------------|--------------|
| 6 | -6.691434000 | 3.523547000  | 5.848890000  | 6 | 5.767855000  | -0.719453000 | -1.631901000 |
| 1 | -7.686113000 | 3.574316000  | 6.304078000  | 6 | 4.085357000  | 0.753137000  | -2.537858000 |
| 1 | -6.790112000 | 3.887221000  | 4.824072000  | 6 | 4.439720000  | -0.487951000 | -2.004886000 |
| 7 | -6.322962000 | 2.108419000  | 5.799465000  | 1 | 7.763280000  | 0.080431000  | -1.527470000 |
| 1 | -6.531436000 | 1.557207000  | 6.621244000  | 1 | 4.769441000  | 2.707505000  | -3.139492000 |
| 6 | -5.511192000 | 1.533224000  | 4.887466000  | 1 | 6.055243000  | -1.685011000 | -1.223562000 |
| 7 | -5.022332000 | 2.219023000  | 3.852936000  | 1 | 3.058534000  | 0.936737000  | -2.842512000 |
| 1 | -5.073044000 | 3.236081000  | 3.795175000  | 1 | 3.698484000  | -1.276091000 | -1.904709000 |
| 1 | -4.398789000 | 1.733481000  | 3.188261000  | 7 | 1.003706000  | 3.985002000  | -3.035534000 |
| 7 | -5.207147000 | 0.234608000  | 5.015223000  | 1 | 0.742270000  | 3.328613000  | -2.287352000 |
| 1 | -5.717393000 | -0.335550000 | 5.674195000  | 1 | 1.722343000  | 3.576194000  | -3.635727000 |
| 1 | -4.646492000 | -0.244325000 | 4.283786000  | 1 | 1.397037000  | 4.892021000  | -2.553951000 |
| 6 | -7.838747000 | 6.010664000  | -1.312969000 | 6 | -0.255213000 | 4.333190000  | -3.772784000 |
| 1 | -8.109050000 | 6.869242000  | -0.689362000 | 1 | -0.136460000 | 5.360785000  | -4.125025000 |
| 1 | -8.613955000 | 5.245426000  | -1.184456000 | 6 | -1.416451000 | 4.263871000  | -2.749473000 |
| 1 | -7.861972000 | 6.337039000  | -2.359868000 | 8 | -2.547359000 | 4.633936000  | -3.152073000 |
| 6 | -6.454828000 | 5.472012000  | -0.932091000 | 8 | -1.118306000 | 3.789303000  | -1.617013000 |
| 1 | -6.443765000 | 5.178974000  | 0.126548000  | 6 | -0.527896000 | 3.413332000  | -4.984913000 |
| 1 | -5.699775000 | 6.260287000  | -1.042016000 | 1 | -1.306860000 | 3.919677000  | -5.563870000 |
| 6 | -6.040234000 | 4.275150000  | -1.802416000 | 1 | 0.358735000  | 3.403670000  | -5.630259000 |
| 1 | -6.773699000 | 3.463508000  | -1.724107000 | 6 | -0.944113000 | 1.997774000  | -4.660372000 |
| 1 | -6.022883000 | 4.571281000  | -2.856408000 | 6 | -2.149369000 | 1.599431000  | -4.113004000 |
| 7 | -4.708213000 | 3.755477000  | -1.494040000 | 1 | -2.988797000 | 2.195912000  | -3.786766000 |
| 1 | -3.910445000 | 4.130722000  | -2.037130000 | 7 | -2.159448000 | 0.232456000  | -3.938989000 |
| 6 | -4.439478000 | 2.785966000  | -0.613114000 | 1 | -2.925340000 | -0.295108000 | -3.546762000 |
| 7 | -3.194765000 | 2.322242000  | -0.479963000 | 6 | -0.963646000 | -0.293246000 | -4.367384000 |
| 1 | -5.111359000 | 1.593199000  | 0.870000000  | 6 | -0.162903000 | 0.792750000  | -4.832665000 |
| 1 | -6.293474000 | 2.675674000  | 0.256635000  | 6 | 1.128157000  | 0.529391000  | -5.335318000 |
| 7 | -5.422481000 | 2.188534000  | 0.107330000  | 6 | 1.598649000  | -0.785358000 | -5.357536000 |
| 1 | -3.011482000 | 1.721241000  | 0.328041000  | 6 | -0.518060000 | -1.629539000 | -4.391263000 |
| 1 | -2.410140000 | 2.852419000  | -0.891624000 | 6 | 0.751116000  | -1.784449000 | -4.885029000 |
| 6 | -8.655675000 | 6.001185000  | -6.315308000 | 1 | 1.758249000  | 1.333750000  | -5.708031000 |
| 1 | -9.139535000 | 5.080241000  | -6.660808000 | 1 | 2.593024000  | -1.016557000 | -5.727998000 |
| 1 | -9.391679000 | 6.812369000  | -6.366431000 | 1 | -1.136779000 | -2.455184000 | -4.048798000 |
| 1 | -8.379825000 | 5.858464000  | -5.263724000 | 1 | 1.437873000  | -3.338048000 | -2.803589000 |
| 6 | -7.416083000 | 6.324844000  | -7.168953000 | 7 | 3.663850000  | -3.836458000 | -4.835068000 |
| 6 | -6.371044000 | 5.228842000  | -7.130192000 | 8 | 4.454435000  | -2.959404000 | -4.592311000 |
| 6 | -5.387878000 | 5.197992000  | -6.132600000 | 8 | 2.884203000  | -3.986333000 | -5.742072000 |
| 6 | -6.375600000 | 4.184156000  | -8.066827000 |   |              |              |              |
| 6 | -4.445136000 | 4.169483000  | -6.056078000 |   |              |              |              |
| 6 | -5.444483000 | 3.148880000  | -8.009752000 |   |              |              |              |
| 6 | -4.473560000 | 3.134210000  | -6.999992000 |   |              |              |              |
| 8 | -3.585131000 | 2.093962000  | -7.005011000 |   |              |              |              |
| 1 | -2.999904000 | 2.137861000  | -6.225660000 |   |              |              |              |
| 1 | -6.975896000 | 7.266617000  | -6.816822000 |   |              |              |              |
| 1 | -7.730783000 | 6.496314000  | -8.206324000 |   |              |              |              |
| 1 | -5.346004000 | 6.000212000  | -5.398188000 |   |              |              |              |
| 1 | -7.121249000 | 4.180815000  | -8.859375000 |   |              |              |              |
| 1 | -3.696515000 | 4.192431000  | -5.267109000 |   |              |              |              |
| 1 | -5.453629000 | 2.346110000  | -8.741391000 |   |              |              |              |
| 8 | 1.673981000  | 6.306816000  | -2.071943000 |   |              |              |              |
| 8 | 3.061330000  | 7.925851000  | -1.380841000 |   |              |              |              |
| 6 | 2.745902000  | 6.730829000  | -1.479122000 |   |              |              |              |
| 6 | 3.625479000  | 5.650672000  | -0.819942000 |   |              |              |              |
| 1 | 2.971312000  | 5.065658000  | -0.158179000 |   |              |              |              |
| 1 | 3.969214000  | 4.947509000  | -1.591632000 |   |              |              |              |
| 6 | 4.795948000  | 6.225497000  | -0.015441000 |   |              |              |              |
| 1 | 4.420382000  | 7.068203000  | 0.571841000  |   |              |              |              |
| 1 | 5.540807000  | 6.669385000  | -0.690079000 |   |              |              |              |
| 6 | 5.440980000  | 5.238971000  | 0.970078000  |   |              |              |              |
| 1 | 4.669927000  | 4.811632000  | 1.619128000  |   |              |              |              |
| 1 | 6.118536000  | 5.792852000  | 1.636512000  |   |              |              |              |
| 6 | 6.265325000  | 4.073598000  | 0.438886000  |   |              |              |              |
| 8 | 6.399504000  | 3.031006000  | 1.110869000  |   |              |              |              |
| 7 | 6.901663000  | 4.246461000  | -0.738167000 |   |              |              |              |
| 1 | 6.760512000  | 5.120195000  | -1.227418000 |   |              |              |              |
| 6 | 7.898557000  | 3.328129000  | -1.280300000 |   |              |              |              |
| 1 | 8.137080000  | 2.615317000  | -0.488814000 |   |              |              |              |
| 1 | 8.802687000  | 3.906621000  | -1.502919000 |   |              |              |              |
| 6 | 7.448981000  | 2.587699000  | -2.557124000 |   |              |              |              |
| 1 | 8.347995000  | 2.122895000  | -2.982667000 |   |              |              |              |
| 1 | 7.103035000  | 3.325253000  | -3.291895000 |   |              |              |              |
| 6 | 6.387150000  | 1.527398000  | -2.345932000 |   |              |              |              |
| 6 | 6.729205000  | 0.278309000  | -1.802990000 |   |              |              |              |
| 6 | 5.051383000  | 1.750347000  | -2.705431000 |   |              |              |              |

## Model B system – C7

<sup>2</sup>TS4<sub>B,C7-endo</sub>

|    |              |              |              |
|----|--------------|--------------|--------------|
| 26 | 2.512545000  | -4.553530000 | -0.180364000 |
| 7  | 1.233969000  | -4.178861000 | 1.347504000  |
| 7  | 3.951042000  | -5.089877000 | 1.137515000  |
| 7  | 3.728659000  | -5.101823000 | -1.706361000 |
| 7  | 1.017779000  | -4.187098000 | -1.496741000 |
| 6  | -0.046680000 | -3.696320000 | 1.259781000  |
| 6  | -0.589734000 | -3.448528000 | 2.591971000  |
| 6  | 0.396565000  | -3.807972000 | 3.461934000  |
| 6  | 1.527034000  | -4.253808000 | 2.681702000  |
| 6  | 3.859934000  | -5.048171000 | 2.502308000  |
| 6  | 5.119341000  | -5.442837000 | 3.096643000  |
| 6  | 5.968518000  | -5.716602000 | 2.068520000  |
| 6  | 5.227457000  | -5.492652000 | 0.845788000  |
| 6  | 5.037738000  | -5.493549000 | -1.615065000 |
| 6  | 5.586149000  | -5.706134000 | -2.936616000 |
| 6  | 4.588554000  | -5.436209000 | -3.823416000 |
| 6  | 3.431084000  | -5.057047000 | -3.043137000 |
| 6  | 1.090671000  | -4.285391000 | -2.860830000 |
| 6  | -0.164429000 | -3.879076000 | -3.454607000 |
| 6  | -0.988960000 | -3.529470000 | -2.422755000 |
| 6  | -0.237575000 | -3.729100000 | -1.203938000 |
| 6  | -0.740199000 | -3.493872000 | 0.073786000  |
| 6  | 2.735378000  | -4.671180000 | 3.227811000  |
| 6  | 5.744239000  | -5.678683000 | -0.430981000 |
| 6  | 2.204756000  | -4.692621000 | -3.588396000 |
| 1  | -1.761318000 | -3.132977000 | 0.139101000  |
| 1  | 2.813848000  | -4.683502000 | 4.310673000  |
| 1  | 6.777842000  | -6.001752000 | -0.510218000 |
| 1  | 2.110710000  | -4.719575000 | -4.669419000 |
| 1  | 0.374168000  | -3.764445000 | 4.544395000  |
| 1  | 5.307627000  | -5.494745000 | 4.161739000  |
| 1  | 7.000507000  | -6.042007000 | 2.112013000  |
| 1  | 6.602572000  | -6.020922000 | -3.138078000 |
| 1  | 4.614318000  | -5.473985000 | -4.905192000 |
| 1  | -0.371141000 | -3.879470000 | -4.517749000 |
| 1  | -2.014262000 | -3.183150000 | -2.465666000 |
| 6  | -1.929715000 | -2.853801000 | 2.922311000  |
| 6  | -1.999691000 | -1.342015000 | 2.630120000  |
| 6  | -3.236082000 | -0.644982000 | 3.202160000  |
| 8  | -3.555287000 | 0.489328000  | 2.659135000  |
| 8  | -3.848936000 | -1.152839000 | 4.161520000  |
| 1  | -2.140974000 | -3.009260000 | 3.984382000  |
| 1  | -2.729977000 | -3.364150000 | 2.369754000  |
| 1  | -1.118520000 | -0.845079000 | 3.061061000  |
| 1  | -1.950294000 | -1.148912000 | 1.553261000  |
| 16 | 1.685032000  | -6.951784000 | -0.086508000 |
| 1  | 2.862614000  | -7.568550000 | -0.336780000 |
| 8  | 3.037727000  | -2.995037000 | -0.226237000 |
| 7  | 2.877603000  | 1.252014000  | 1.929615000  |
| 1  | 3.821969000  | 1.361453000  | 1.573691000  |
| 1  | 2.358513000  | 2.118225000  | 2.039478000  |
| 6  | 2.552359000  | 0.242177000  | 2.781093000  |
| 8  | 1.487497000  | 0.231015000  | 3.409021000  |
| 6  | 3.544846000  | -0.913273000 | 2.886048000  |
| 1  | 3.256012000  | -1.492277000 | 3.765338000  |
| 1  | 3.414640000  | -1.560567000 | 2.008913000  |
| 6  | 5.028497000  | -0.508004000 | 2.989807000  |
| 1  | 5.377758000  | -0.017805000 | 2.076924000  |
| 1  | 5.618485000  | -1.426178000 | 3.099368000  |
| 6  | 5.320397000  | 0.348120000  | 4.220309000  |
| 8  | 5.051679000  | -0.034924000 | 5.360692000  |
| 7  | 5.917011000  | 1.551751000  | 3.978950000  |
| 1  | 6.036918000  | 1.865655000  | 3.016877000  |
| 6  | 6.312897000  | 2.414863000  | 5.075031000  |
| 1  | 6.717053000  | 1.810302000  | 5.889332000  |
| 1  | 7.103063000  | 3.086175000  | 4.721378000  |
| 6  | 5.198776000  | 3.276088000  | 5.695898000  |
| 8  | 5.228662000  | 3.582952000  | 6.888825000  |
| 7  | 4.243957000  | 3.711196000  | 4.838159000  |
| 1  | 4.210658000  | 3.348227000  | 3.891558000  |

|   |              |              |              |
|---|--------------|--------------|--------------|
| 6 | 3.039150000  | 4.385981000  | 5.286708000  |
| 1 | 2.671129000  | 3.875785000  | 6.185811000  |
| 6 | 3.262675000  | 5.874807000  | 5.688442000  |
| 1 | 4.012866000  | 5.856455000  | 6.484195000  |
| 1 | 2.331648000  | 6.241243000  | 6.138083000  |
| 6 | 3.694030000  | 6.801403000  | 4.574571000  |
| 6 | 5.054605000  | 7.017241000  | 4.311499000  |
| 6 | 2.743538000  | 7.478312000  | 3.793916000  |
| 6 | 5.457943000  | 7.885368000  | 3.294116000  |
| 6 | 3.143033000  | 8.343757000  | 2.773314000  |
| 6 | 4.502377000  | 8.551207000  | 2.521939000  |
| 1 | 5.801561000  | 6.511228000  | 4.918206000  |
| 1 | 1.683558000  | 7.329329000  | 3.989869000  |
| 1 | 6.517073000  | 8.046838000  | 3.110166000  |
| 1 | 2.394256000  | 8.858644000  | 2.177199000  |
| 1 | 4.812678000  | 9.227740000  | 1.730305000  |
| 6 | 1.998123000  | 4.218267000  | 4.169915000  |
| 8 | 2.335646000  | 3.896970000  | 3.023589000  |
| 7 | 0.713755000  | 4.416798000  | 4.532037000  |
| 1 | 0.507149000  | 4.823260000  | 5.435415000  |
| 6 | -0.390779000 | 4.266587000  | 3.604053000  |
| 1 | 0.023319000  | 4.337997000  | 2.592773000  |
| 6 | -1.017115000 | 2.851588000  | 3.730405000  |
| 1 | -0.185466000 | 2.139910000  | 3.637193000  |
| 8 | -1.896855000 | 2.702520000  | 2.612140000  |
| 1 | -2.400818000 | 1.861495000  | 2.706073000  |
| 6 | -1.730583000 | 2.617624000  | 5.063202000  |
| 1 | -1.041240000 | 2.755770000  | 5.903380000  |
| 1 | -2.110450000 | 1.591820000  | 5.115487000  |
| 1 | -2.578234000 | 3.301153000  | 5.184339000  |
| 6 | -1.362176000 | 5.451695000  | 3.782205000  |
| 8 | -1.064571000 | 6.426023000  | 4.478577000  |
| 7 | -2.514048000 | 5.335372000  | 3.081091000  |
| 1 | -2.678247000 | 4.443849000  | 2.612315000  |
| 6 | -3.460073000 | 6.420760000  | 2.917883000  |
| 1 | -3.065243000 | 7.267235000  | 3.484268000  |
| 6 | -3.608871000 | 6.814044000  | 1.414668000  |
| 1 | -4.361211000 | 7.612023000  | 1.354082000  |
| 1 | -4.027884000 | 5.947490000  | 0.889075000  |
| 6 | -2.326712000 | 7.243197000  | 0.767256000  |
| 6 | -1.495482000 | 6.454209000  | -0.001686000 |
| 7 | -0.393145000 | 7.168491000  | -0.408842000 |
| 1 | -1.608158000 | 5.415238000  | -0.286446000 |
| 1 | 0.372212000  | 6.817868000  | -1.002179000 |
| 6 | -1.691775000 | 8.536120000  | 0.844441000  |
| 6 | -0.480020000 | 8.445140000  | 0.097132000  |
| 6 | -2.014065000 | 9.761373000  | 1.459946000  |
| 6 | 0.405828000  | 9.523413000  | -0.035391000 |
| 6 | -1.142418000 | 10.836895000 | 1.325172000  |
| 6 | 0.058232000  | 10.717689000 | 0.589229000  |
| 1 | -2.931203000 | 9.869094000  | 2.035126000  |
| 1 | -1.383425000 | 11.785885000 | 1.797661000  |
| 1 | 0.721245000  | 11.575317000 | 0.509055000  |
| 1 | 1.331678000  | 9.407644000  | -0.592983000 |
| 6 | -4.834658000 | 6.001739000  | 3.452355000  |
| 8 | -5.334330000 | 4.909286000  | 3.137018000  |
| 7 | -5.474434000 | 6.912286000  | 4.214238000  |
| 1 | -4.985764000 | 7.766384000  | 4.448475000  |
| 6 | -6.851414000 | 6.765481000  | 4.684957000  |
| 1 | -7.320504000 | 7.752983000  | 4.632235000  |
| 1 | -7.368127000 | 6.118425000  | 3.972278000  |
| 6 | -6.970294000 | 6.224276000  | 6.119731000  |
| 1 | -6.418992000 | 6.891685000  | 6.793589000  |
| 1 | -8.027188000 | 6.294330000  | 6.412653000  |
| 6 | -6.473315000 | 4.785259000  | 6.329134000  |
| 1 | -6.498089000 | 4.557707000  | 7.402294000  |
| 1 | -5.426002000 | 4.697526000  | 6.016549000  |
| 6 | -7.319151000 | 3.738009000  | 5.587930000  |
| 1 | -8.369094000 | 3.821174000  | 5.888066000  |
| 1 | -7.282998000 | 3.896235000  | 4.508160000  |
| 7 | -6.909470000 | 2.360213000  | 5.860680000  |
| 1 | -7.203410000 | 1.965111000  | 6.743753000  |
| 6 | -5.995062000 | 1.651869000  | 5.165982000  |
| 7 | -5.389949000 | 2.153146000  | 4.088091000  |
| 1 | -5.419689000 | 3.144201000  | 3.850359000  |



|    |              |              |              |   |              |              |              |
|----|--------------|--------------|--------------|---|--------------|--------------|--------------|
| 1  | -1.143995000 | -0.811656000 | 2.896875000  | 6 | -0.965813000 | 10.878512000 | 1.650531000  |
| 1  | -1.978888000 | -1.212433000 | 1.415246000  | 6 | 0.211788000  | 10.759228000 | 0.878120000  |
| 16 | 1.538379000  | -7.233557000 | 0.195502000  | 1 | -2.761176000 | 9.927489000  | 2.367006000  |
| 1  | 2.698029000  | -7.896222000 | -0.017478000 | 1 | -1.168103000 | 11.812054000 | 2.169726000  |
| 8  | 3.057726000  | -3.329599000 | -0.224825000 | 1 | 0.896274000  | 11.601525000 | 0.817351000  |
| 7  | 2.935806000  | 1.274432000  | 1.708634000  | 1 | 1.419589000  | 9.464986000  | -0.389432000 |
| 1  | 3.879313000  | 1.405663000  | 1.358385000  | 6 | -4.775216000 | 6.063543000  | 3.622283000  |
| 1  | 2.415043000  | 2.131227000  | 1.871326000  | 8 | -5.318416000 | 5.020256000  | 3.221879000  |
| 6  | 2.613657000  | 0.219488000  | 2.506901000  | 7 | -5.382116000 | 6.936182000  | 4.452267000  |
| 8  | 1.548584000  | 0.174253000  | 3.131920000  | 1 | -4.863257000 | 7.752771000  | 4.747786000  |
| 6  | 3.608923000  | -0.937517000 | 2.555351000  | 6 | -6.777290000 | 6.823557000  | 4.881956000  |
| 1  | 3.332456000  | -1.547806000 | 3.417585000  | 1 | -7.190240000 | 7.836790000  | 4.907380000  |
| 1  | 3.467144000  | -1.558102000 | 1.660403000  | 1 | -7.310382000 | 6.273235000  | 4.102964000  |
| 6  | 5.093186000  | -0.534250000 | 2.655214000  | 6 | -6.970213000 | 6.165371000  | 6.259162000  |
| 1  | 5.431209000  | -0.006887000 | 1.758825000  | 1 | -6.428899000 | 6.753774000  | 7.010330000  |
| 1  | 5.686002000  | -1.454790000 | 2.719763000  | 1 | -8.036328000 | 6.243591000  | 6.513464000  |
| 6  | 5.399987000  | 0.269780000  | 3.916854000  | 6 | -6.521606000 | 4.698590000  | 6.360190000  |
| 8  | 5.151530000  | -0.164192000 | 5.043488000  | 1 | -6.620286000 | 4.373116000  | 7.403493000  |
| 7  | 5.984656000  | 1.487157000  | 3.720109000  | 1 | -5.458353000 | 4.610570000  | 6.106175000  |
| 1  | 6.097417000  | 1.841158000  | 2.770619000  | 6 | -7.338015000 | 3.748205000  | 5.701780000  |
| 6  | 6.404591000  | 2.294870000  | 4.848962000  | 1 | -8.404928000 | 3.837444000  | 5.701360000  |
| 1  | 6.843598000  | 1.654282000  | 5.616633000  | 1 | -7.215051000 | 4.000495000  | 4.415632000  |
| 1  | 7.173613000  | 2.996167000  | 4.507278000  | 7 | -6.983958000 | 2.340053000  | 5.648551000  |
| 6  | 5.299967000  | 3.104362000  | 5.550823000  | 1 | -7.350935000 | 1.883600000  | 6.472699000  |
| 8  | 5.369870000  | 3.355235000  | 6.755090000  | 6 | -6.044763000 | 1.654992000  | 4.962165000  |
| 7  | 4.307362000  | 3.560951000  | 4.749237000  | 7 | -5.349681000 | 2.211670000  | 3.969238000  |
| 1  | 4.246938000  | 3.239998000  | 3.789059000  | 1 | -5.358376000 | 3.214520000  | 3.784538000  |
| 6  | 3.109728000  | 4.198279000  | 5.265727000  | 1 | -4.668021000 | 1.627561000  | 3.463139000  |
| 1  | 2.759495000  | 3.629036000  | 6.136197000  | 7 | -5.821199000 | 0.373392000  | 5.280536000  |
| 6  | 3.335479000  | 5.659641000  | 5.758435000  | 1 | -6.456615000 | -0.105433000 | 5.902277000  |
| 1  | 4.100767000  | 5.594131000  | 6.536930000  | 1 | -5.133853000 | -0.197285000 | 4.748030000  |
| 1  | 2.412041000  | 5.991065000  | 6.248772000  | 6 | -7.598913000 | 5.379350000  | -1.308407000 |
| 6  | 3.740678000  | 6.659221000  | 4.698603000  | 1 | -7.733920000 | 6.311306000  | -0.749542000 |
| 6  | 5.095027000  | 6.905625000  | 4.429828000  | 1 | -8.460749000 | 4.734293000  | -1.097675000 |
| 6  | 2.772081000  | 7.373945000  | 3.975840000  | 1 | -7.616401000 | 5.623296000  | -2.377432000 |
| 6  | 5.474642000  | 7.839272000  | 3.462490000  | 6 | -6.281214000 | 4.697149000  | -0.920229000 |
| 6  | 3.147833000  | 8.304770000  | 3.004704000  | 1 | -6.260609000 | 4.500690000  | -1.159841000 |
| 6  | 4.501113000  | 8.541102000  | 2.746381000  | 1 | -5.438790000 | 5.368451000  | -1.129353000 |
| 1  | 5.855847000  | 6.371445000  | 4.993724000  | 6 | -6.056265000 | 3.385119000  | -1.690433000 |
| 1  | 1.716578000  | 7.203707000  | 4.178350000  | 1 | -6.873903000 | 2.677377000  | -1.506283000 |
| 1  | 6.529299000  | 8.023214000  | 3.273949000  | 1 | -6.062700000 | 3.585055000  | -2.766383000 |
| 1  | 2.385558000  | 8.848493000  | 2.452950000  | 7 | -4.774083000 | 2.744988000  | -1.398609000 |
| 1  | 4.793219000  | 9.269437000  | 1.994715000  | 1 | -3.971756000 | 2.977757000  | -2.003366000 |
| 6  | 2.045484000  | 4.100374000  | 4.160572000  | 6 | -4.520831000 | 1.915788000  | -0.381855000 |
| 8  | 2.356681000  | 3.827662000  | 2.994513000  | 7 | -3.274663000 | 1.456555000  | -0.192911000 |
| 7  | 0.770490000  | 4.304394000  | 4.553145000  | 1 | -5.201688000 | 0.984234000  | 1.280611000  |
| 1  | 0.584753000  | 4.675188000  | 5.476281000  | 1 | -6.419850000 | 1.859000000  | 0.411131000  |
| 6  | -0.350205000 | 4.223330000  | 3.634826000  | 7 | -5.496256000 | 1.456495000  | 0.429714000  |
| 1  | 0.048400000  | 4.351047000  | 2.622687000  | 1 | -3.111536000 | 0.979755000  | 0.696739000  |
| 6  | -0.991985000 | 2.810631000  | 3.686049000  | 1 | -2.495599000 | 2.005243000  | -0.583222000 |
| 1  | -0.169674000 | 2.097518000  | 3.536250000  | 6 | -8.716207000 | 6.935032000  | -6.256527000 |
| 8  | -1.890748000 | 2.738764000  | 2.576127000  | 1 | -9.001642000 | 6.035348000  | -6.814088000 |
| 1  | -2.381712000 | 1.885305000  | 2.612013000  | 1 | -9.458439000 | 7.714539000  | -6.466205000 |
| 6  | -1.686245000 | 2.505414000  | 5.014814000  | 1 | -8.767693000 | 6.695106000  | -5.187903000 |
| 1  | -0.979919000 | 2.578923000  | 5.848984000  | 6 | -7.300907000 | 7.399305000  | -6.647777000 |
| 1  | -2.084009000 | 1.485127000  | 5.010010000  | 6 | -6.237216000 | 6.353688000  | -6.381056000 |
| 1  | -2.518891000 | 3.194643000  | 5.193822000  | 6 | -5.536606000 | 6.317934000  | -5.167901000 |
| 6  | -1.303769000 | 5.407536000  | 3.899046000  | 6 | -5.942237000 | 5.359899000  | -7.327524000 |
| 8  | -0.981892000 | 6.334348000  | 4.647386000  | 6 | -4.585209000 | 5.331495000  | -4.897041000 |
| 7  | -2.469008000 | 5.349788000  | 3.211344000  | 6 | -4.998825000 | 4.365936000  | -7.075592000 |
| 1  | -2.648071000 | 4.494440000  | 2.684600000  | 6 | -4.313750000 | 4.338845000  | -5.851665000 |
| 6  | -3.388597000 | 6.466346000  | 3.108052000  | 8 | -3.407687000 | 3.345935000  | -5.646762000 |
| 1  | -2.967525000 | 7.275291000  | 3.709200000  | 1 | -3.050999000 | 3.390974000  | -4.724033000 |
| 6  | -3.544390000 | 6.928579000  | 1.625028000  | 1 | -7.060379000 | 8.317124000  | -6.096069000 |
| 1  | -4.273853000 | 7.749776000  | 1.610498000  | 1 | -7.295937000 | 7.666483000  | -7.712598000 |
| 1  | -3.997740000 | 6.097802000  | 1.071480000  | 1 | -5.729338000 | 7.082314000  | -4.417297000 |
| 6  | -2.262951000 | 7.346251000  | 0.971229000  | 1 | -6.461717000 | 5.364033000  | -8.283979000 |
| 6  | -1.474849000 | 6.568811000  | 0.147091000  | 1 | -4.041643000 | 5.331583000  | -3.956246000 |
| 7  | -0.363994000 | 7.269313000  | -0.258982000 | 1 | -4.779106000 | 3.602241000  | -7.816370000 |
| 1  | -1.623992000 | 5.547163000  | -0.180494000 | 8 | 1.750381000  | 6.193786000  | -1.813035000 |
| 1  | 0.372180000  | 6.917587000  | -0.887887000 | 8 | 3.199941000  | 7.702048000  | -1.003121000 |
| 6  | -1.590114000 | 8.616435000  | 1.086195000  | 6 | 2.830469000  | 6.532408000  | -1.177423000 |
| 6  | -0.401256000 | 8.525323000  | 0.303114000  | 6 | 3.631785000  | 5.371611000  | -0.561333000 |
| 6  | -1.862720000 | 9.821467000  | 1.762705000  | 1 | 3.036153000  | 4.994675000  | 0.284005000  |
| 6  | 0.510665000  | 9.584343000  | 0.194165000  | 1 | 3.684511000  | 4.546643000  | -1.283035000 |



|   |              |              |              |   |              |              |              |
|---|--------------|--------------|--------------|---|--------------|--------------|--------------|
| 1 | 0.205963000  | 4.508573000  | 2.727749000  | 1 | -2.863633000 | 1.000912000  | 1.082831000  |
| 6 | -0.745013000 | 2.989467000  | 3.896213000  | 1 | -2.219040000 | 1.821658000  | -0.350760000 |
| 1 | 0.150520000  | 2.351343000  | 3.879887000  | 6 | -7.927795000 | 7.372173000  | -6.067362000 |
| 8 | -1.543984000 | 2.713918000  | 2.743259000  | 1 | -8.291332000 | 6.525611000  | -6.661491000 |
| 1 | -2.119690000 | 1.932483000  | 2.909623000  | 1 | -8.597591000 | 8.222768000  | -6.242390000 |
| 6 | -1.495970000 | 2.751319000  | 5.205791000  | 1 | -8.002459000 | 7.093490000  | -5.009675000 |
| 1 | -0.858103000 | 2.994213000  | 6.062218000  | 6 | -6.476745000 | 7.722963000  | -6.441597000 |
| 1 | -1.783377000 | 1.698241000  | 5.295138000  | 6 | -5.517034000 | 6.574372000  | -6.210903000 |
| 1 | -2.405045000 | 3.360335000  | 5.257522000  | 6 | -4.921392000 | 6.368055000  | -4.958912000 |
| 6 | -1.325912000 | 5.541651000  | 3.811616000  | 6 | -5.225026000 | 5.652727000  | -7.227561000 |
| 8 | -1.158373000 | 6.553193000  | 4.500691000  | 6 | -4.071480000 | 5.287468000  | -4.719515000 |
| 7 | -2.413851000 | 5.309929000  | 3.044420000  | 6 | -4.379485000 | 4.566441000  | -7.008631000 |
| 1 | -2.467236000 | 4.393965000  | 2.597836000  | 6 | -3.796965000 | 4.372789000  | -5.748400000 |
| 6 | -3.447159000 | 6.297351000  | 2.796770000  | 8 | -2.974353000 | 3.301882000  | -5.577203000 |
| 1 | -3.118737000 | 7.221974000  | 3.276972000  | 1 | -2.669724000 | 3.254288000  | -4.634067000 |
| 6 | -3.630783000 | 6.531591000  | 1.265975000  | 1 | -6.157659000 | 8.594682000  | -5.855594000 |
| 1 | -4.446475000 | 7.255192000  | 1.136557000  | 1 | -6.441912000 | 8.026560000  | -7.495757000 |
| 1 | -3.977968000 | 5.587764000  | 0.828501000  | 1 | -5.118526000 | 7.070834000  | -4.151403000 |
| 6 | -2.386879000 | 7.003498000  | 0.575201000  | 1 | -5.666209000 | 5.788311000  | -8.213268000 |
| 6 | -1.459320000 | 6.211139000  | -0.070005000 | 1 | -3.610377000 | 5.151501000  | -7.008631000 |
| 7 | -0.420040000 | 6.974756000  | -0.546442000 | 1 | -4.157059000 | 3.860607000  | -7.803998000 |
| 1 | -1.461235000 | 5.138981000  | -0.222650000 | 8 | 1.903927000  | 5.921811000  | -1.763776000 |
| 1 | 0.402503000  | 6.621051000  | -1.056922000 | 8 | 3.190619000  | 7.682192000  | -1.235466000 |
| 6 | -1.883467000 | 8.352780000  | 0.496471000  | 6 | 2.926920000  | 6.471661000  | -1.188706000 |
| 6 | -0.645856000 | 8.290020000  | -0.210971000 | 6 | 3.803935000  | 5.532364000  | -0.341444000 |
| 6 | -2.342079000 | 9.607335000  | 0.943381000  | 1 | 3.344932000  | 5.494282000  | 0.658471000  |
| 6 | 0.134653000  | 9.426705000  | -0.464074000 | 1 | 3.739128000  | 4.513781000  | -0.739212000 |
| 6 | -1.575851000 | 10.739431000 | 0.686584000  | 6 | 5.263963000  | 5.978877000  | -0.214189000 |
| 6 | -0.347050000 | 10.649396000 | -0.005680000 | 1 | 5.278518000  | 7.038748000  | 0.054512000  |
| 1 | -3.282710000 | 9.694263000  | 1.483051000  | 1 | 5.760598000  | 5.918364000  | -1.193456000 |
| 1 | -1.922713000 | 11.711415000 | 1.028453000  | 6 | 6.061191000  | 5.203342000  | 0.849750000  |
| 1 | 0.231947000  | 11.552126000 | -0.182859000 | 1 | 5.651099000  | 5.402922000  | 1.845002000  |
| 1 | 1.084473000  | 9.334436000  | -0.984315000 | 1 | 7.101873000  | 5.556955000  | 0.865180000  |
| 6 | -4.779134000 | 5.821017000  | 3.390124000  | 6 | 6.100468000  | 3.686786000  | 0.710621000  |
| 8 | -5.195284000 | 4.672677000  | 3.170830000  | 8 | 6.104644000  | 2.945155000  | 1.713298000  |
| 7 | -5.474165000 | 6.734496000  | 4.098714000  | 7 | 6.138659000  | 3.180665000  | -0.538325000 |
| 1 | -5.050490000 | 7.638373000  | 4.262317000  | 1 | 6.180635000  | 3.825340000  | -1.315368000 |
| 6 | -6.809309000 | 6.496773000  | 4.644358000  | 6 | 6.154770000  | 1.751294000  | -0.829180000 |
| 1 | -7.393471000 | 7.411269000  | 4.499865000  | 1 | 5.614230000  | 1.596606000  | -1.767988000 |
| 1 | -7.267719000 | 5.713510000  | 4.036568000  | 1 | 5.600311000  | 1.246998000  | -0.034924000 |
| 6 | -6.808230000 | 6.124397000  | 6.136437000  | 6 | 7.575758000  | 1.154926000  | -0.927605000 |
| 1 | -6.311836000 | 6.927840000  | 6.694852000  | 1 | 7.466673000  | 0.069307000  | -1.041069000 |
| 1 | -7.852216000 | 6.112437000  | 6.479295000  | 1 | 8.088065000  | 1.330360000  | 0.025137000  |
| 6 | -6.134266000 | 4.788088000  | 6.484156000  | 6 | 8.387801000  | 1.715638000  | -2.075612000 |
| 1 | -6.011777000 | 4.724894000  | 7.572606000  | 6 | 8.299795000  | 1.148481000  | -3.356329000 |
| 1 | -5.125510000 | 4.751831000  | 6.056001000  | 6 | 9.219035000  | 2.831392000  | -1.897854000 |
| 6 | -6.938647000 | 3.565902000  | 6.014979000  | 6 | 9.015534000  | 1.682588000  | -4.429551000 |
| 1 | -7.931503000 | 3.570879000  | 6.476919000  | 6 | 9.936982000  | 3.369832000  | -2.968936000 |
| 1 | -7.094087000 | 3.583253000  | 4.933343000  | 6 | 9.836446000  | 2.797575000  | -4.239179000 |
| 7 | -6.312919000 | 2.289694000  | 6.360894000  | 1 | 7.670941000  | 0.273993000  | -3.510892000 |
| 1 | -6.400326000 | 1.981057000  | 7.319782000  | 1 | 9.309816000  | 3.277102000  | -0.910102000 |
| 6 | -5.434421000 | 1.617600000  | 5.587236000  | 1 | 8.936174000  | 1.225171000  | -5.412292000 |
| 7 | -5.086551000 | 2.065444000  | 4.383094000  | 1 | 10.577920000 | 4.233019000  | -2.809040000 |
| 1 | -5.238779000 | 3.030137000  | 4.090268000  | 1 | 10.396754000 | 3.212920000  | -5.072483000 |
| 1 | -4.430737000 | 1.498310000  | 3.818253000  | 7 | 1.284260000  | 3.431015000  | -2.220959000 |
| 7 | -4.921523000 | 0.459934000  | 6.032285000  | 1 | 0.891887000  | 3.010447000  | -1.358558000 |
| 1 | -5.351950000 | -0.008166000 | 6.817014000  | 1 | 1.992172000  | 2.796680000  | -2.597549000 |
| 1 | -4.273016000 | -0.088503000 | 5.437238000  | 1 | 1.703657000  | 4.409069000  | -1.976178000 |
| 6 | -7.674161000 | 4.218524000  | -1.751210000 | 6 | 0.105482000  | 3.598210000  | -3.140000000 |
| 1 | -7.989344000 | 5.154201000  | -1.277186000 | 1 | -0.033807000 | 4.677564000  | -3.258029000 |
| 1 | -8.416756000 | 3.450704000  | -1.501440000 | 6 | -1.134814000 | 3.049944000  | -2.387388000 |
| 1 | -7.700956000 | 4.369337000  | -2.837225000 | 8 | -2.235485000 | 3.013548000  | -3.005600000 |
| 6 | -6.275200000 | 3.812528000  | -1.282867000 | 8 | -0.945751000 | 2.716354000  | -1.189106000 |
| 1 | -6.261164000 | 3.700556000  | -0.191643000 | 6 | 0.337110000  | 2.982367000  | -4.534990000 |
| 1 | -5.551430000 | 4.599312000  | -1.529832000 | 1 | -0.482732000 | 3.334082000  | -5.167579000 |
| 6 | -5.811811000 | 2.500611000  | -1.934032000 | 1 | 1.251447000  | 3.425608000  | -4.950302000 |
| 1 | -6.550616000 | 1.705796000  | -1.769290000 | 6 | 0.402441000  | 1.479552000  | -4.594101000 |
| 1 | -5.738538000 | 2.624642000  | -3.018546000 | 6 | -0.666808000 | 0.641469000  | -4.824597000 |
| 7 | -4.495722000 | 2.053471000  | -1.481737000 | 1 | -1.704958000 | 0.878717000  | -5.005248000 |
| 1 | -3.677608000 | 2.370561000  | -2.022687000 | 7 | -0.229459000 | -0.665159000 | -4.828479000 |
| 6 | -4.245226000 | 1.515055000  | -0.282178000 | 1 | -0.779553000 | -1.483853000 | -5.046865000 |
| 7 | -2.989330000 | 1.325210000  | 0.120653000  | 6 | 1.117479000  | -0.699000000 | -4.628750000 |
| 1 | -4.979992000 | 0.659217000  | 1.398194000  | 6 | 1.564424000  | 0.628954000  | -4.462592000 |
| 1 | -6.171239000 | 0.969802000  | 0.186693000  | 6 | 2.943480000  | 0.877203000  | -4.249825000 |
| 7 | -5.248169000 | 1.151122000  | 0.551586000  | 6 | 3.826000000  | -0.221492000 | -4.185468000 |

|                                  |              |              |              |   |              |              |              |
|----------------------------------|--------------|--------------|--------------|---|--------------|--------------|--------------|
| 6                                | 1.988124000  | -1.879032000 | -4.535532000 | 1 | 6.901130000  | 1.731057000  | 5.583684000  |
| 6                                | 3.405750000  | -1.526310000 | -4.355676000 | 1 | 7.188760000  | 3.104984000  | 4.501011000  |
| 1                                | 3.335932000  | 1.889508000  | -4.193226000 | 6 | 5.307671000  | 3.126105000  | 5.540107000  |
| 1                                | 4.885048000  | -0.033337000 | -4.028115000 | 8 | 5.344164000  | 3.322436000  | 6.756069000  |
| 1                                | 1.574862000  | -2.567274000 | -3.600103000 | 7 | 4.321756000  | 3.599038000  | 4.738951000  |
| 1                                | 4.120000000  | -2.340676000 | -4.333155000 | 1 | 4.292480000  | 3.340525000  | 3.758867000  |
| 7                                | 1.753723000  | -2.866592000 | -5.676289000 | 6 | 3.109709000  | 4.198293000  | 5.265777000  |
| 8                                | 2.719171000  | -3.438895000 | -6.170126000 | 1 | 2.755073000  | 3.583699000  | 6.102934000  |
| 8                                | 0.584039000  | -3.066923000 | -6.013803000 | 6 | 3.317031000  | 5.635554000  | 5.834308000  |
| <b>2INT5<sub>B,c7-endo</sub></b> |              |              |              |   |              |              |              |
| 26                               | 2.493408000  | -4.499667000 | -0.329946000 | 1 | 4.058935000  | 5.533519000  | 6.631058000  |
| 7                                | 1.255321000  | -4.113974000 | 1.229051000  | 1 | 2.378349000  | 5.944744000  | 6.309914000  |
| 7                                | 3.880254000  | -5.174901000 | 0.980393000  | 6 | 3.755206000  | 6.679215000  | 4.832527000  |
| 7                                | 3.722746000  | -4.890136000 | -1.896516000 | 6 | 5.117419000  | 6.933808000  | 4.616767000  |
| 7                                | 1.097338000  | -3.860394000 | -1.650923000 | 6 | 2.809839000  | 7.420922000  | 4.106584000  |
| 6                                | 0.000434000  | -3.570938000 | 1.146024000  | 6 | 5.527742000  | 7.901853000  | 3.696706000  |
| 6                                | -0.549965000 | -3.351376000 | 2.481756000  | 6 | 3.216662000  | 8.386688000  | 3.183559000  |
| 6                                | 0.406173000  | -3.792801000 | 3.348670000  | 6 | 4.577442000  | 8.630863000  | 2.977139000  |
| 6                                | 1.522908000  | -4.265437000 | 2.562231000  | 1 | 5.859617000  | 6.378748000  | 5.185290000  |
| 6                                | 3.791328000  | -5.218608000 | 2.344842000  | 1 | 1.748587000  | 7.242551000  | 4.268426000  |
| 6                                | 5.010092000  | -5.760522000 | 2.907548000  | 1 | 6.587866000  | 8.091430000  | 3.548671000  |
| 6                                | 5.833544000  | -6.038752000 | 1.858785000  | 1 | 2.472294000  | 8.951241000  | 2.628438000  |
| 6                                | 5.117931000  | -5.664158000 | 0.656694000  | 1 | 4.892859000  | 9.384662000  | 2.260941000  |
| 6                                | 4.989433000  | -5.405789000 | -1.807181000 | 6 | 2.059119000  | 4.151357000  | 4.148228000  |
| 6                                | 5.576682000  | -5.509320000 | -3.125512000 | 8 | 2.381152000  | 3.967379000  | 2.968261000  |
| 6                                | 4.647699000  | -5.044373000 | -4.007698000 | 7 | 0.779992000  | 4.303268000  | 4.550412000  |
| 6                                | 3.490496000  | -4.664160000 | -3.228641000 | 1 | 0.590300000  | 4.582830000  | 5.503791000  |
| 6                                | 1.189930000  | -3.798560000 | -3.018334000 | 6 | -0.342176000 | 4.257898000  | 3.633803000  |
| 6                                | -0.049055000 | -3.306042000 | -3.578651000 | 1 | 0.060666000  | 4.403802000  | 2.626007000  |
| 6                                | -0.887355000 | -3.075376000 | -2.529254000 | 6 | -0.998448000 | 2.851515000  | 3.654401000  |
| 6                                | -0.157435000 | -3.418347000 | -1.327904000 | 1 | -0.183088000 | 2.135482000  | 3.482983000  |
| 6                                | -0.668409000 | -3.279902000 | -0.038843000 | 8 | -1.904702000 | 2.814479000  | 2.548470000  |
| 6                                | 2.695529000  | -4.794050000 | 3.092498000  | 1 | -2.404780000 | 1.965521000  | 2.570022000  |
| 6                                | 5.636996000  | -5.773855000 | -0.630261000 | 6 | -1.688652000 | 2.522129000  | 4.979991000  |
| 6                                | 2.309728000  | -4.155401000 | -3.763775000 | 1 | -0.976039000 | 2.562711000  | 5.811163000  |
| 1                                | -1.682524000 | -2.901625000 | 0.039160000  | 1 | -2.101895000 | 1.508401000  | 4.952991000  |
| 1                                | 2.765504000  | -4.872783000 | 4.173451000  | 1 | -2.509406000 | 3.218917000  | 5.183194000  |
| 1                                | 6.641944000  | -6.175496000 | -0.724850000 | 6 | -1.281487000 | 5.448267000  | 3.921187000  |
| 1                                | 2.263577000  | -4.011329000 | -4.838510000 | 8 | -0.944397000 | 6.365363000  | 4.674257000  |
| 1                                | 0.368897000  | -3.792495000 | 4.431869000  | 7 | -2.454509000 | 5.405998000  | 3.245790000  |
| 1                                | 5.193484000  | -5.899025000 | 3.965990000  | 1 | -2.648406000 | 4.556666000  | 2.714052000  |
| 1                                | 6.834480000  | -6.452431000 | 1.877417000  | 6 | -3.367114000 | 6.528457000  | 3.167356000  |
| 1                                | 6.571400000  | -5.886628000 | -3.329438000 | 1 | -2.958048000 | 7.311077000  | 3.810284000  |
| 1                                | 4.719996000  | -4.958976000 | -5.084864000 | 6 | -3.482035000 | 7.055772000  | 1.701754000  |
| 1                                | -0.231373000 | -3.167046000 | -4.636338000 | 1 | -4.207601000 | 7.880041000  | 1.699639000  |
| 1                                | -1.904509000 | -2.703070000 | -2.546811000 | 1 | -3.920091000 | 6.250963000  | 1.099201000  |
| 6                                | -1.875120000 | -2.726536000 | 2.819189000  | 6 | -2.177653000 | 7.498047000  | 1.110728000  |
| 6                                | -1.952917000 | -1.224013000 | 2.483874000  | 6 | -1.324036000 | 6.728899000  | 0.346022000  |
| 6                                | -3.219086000 | -0.539694000 | 3.002145000  | 7 | -0.205939000 | 7.449439000  | -0.002659000 |
| 8                                | -3.533997000 | 0.593176000  | 2.454542000  | 1 | -1.433199000 | 5.700601000  | 0.023614000  |
| 8                                | -3.864631000 | -1.065453000 | 3.931034000  | 1 | 0.579631000  | 7.111084000  | -0.577802000 |
| 1                                | -2.069563000 | -2.851842000 | 3.888361000  | 6 | -1.539622000 | 8.784190000  | 1.249382000  |
| 1                                | -2.689878000 | -3.246941000 | 2.296723000  | 6 | -0.304895000 | 8.710248000  | 0.538887000  |
| 1                                | -1.089737000 | -0.703517000 | 2.923012000  | 6 | -1.876597000 | 9.991621000  | 1.891681000  |
| 1                                | -1.878505000 | -1.055058000 | 1.404740000  | 6 | 0.588357000  | 9.788247000  | 0.466222000  |
| 16                               | 1.582095000  | -6.741632000 | -0.509092000 | 6 | -0.997441000 | 11.066824000 | 1.816682000  |
| 1                                | 1.609846000  | -7.079995000 | 0.800209000  | 6 | 0.225093000  | 10.964850000 | 1.114746000  |
| 8                                | 3.196173000  | -2.795494000 | -0.181644000 | 1 | -2.810899000 | 10.085777000 | 2.441006000  |
| 7                                | 2.997664000  | 1.444625000  | 1.644522000  | 1 | -1.249794000 | 12.002129000 | 2.310053000  |
| 1                                | 3.941747000  | 1.563922000  | 1.292661000  | 1 | 0.892965000  | 11.821792000 | 1.080949000  |
| 1                                | 2.491525000  | 2.307473000  | 1.821527000  | 1 | 1.530128000  | 9.684690000  | -0.066795000 |
| 6                                | 2.665940000  | 0.385921000  | 2.436552000  | 6 | -4.761208000 | 6.103246000  | 3.640833000  |
| 8                                | 1.601929000  | 0.352519000  | 3.065301000  | 8 | -5.280945000 | 5.053807000  | 3.226190000  |
| 6                                | 3.640135000  | -0.785730000 | 2.461956000  | 7 | -5.395450000 | 6.965589000  | 4.461127000  |
| 1                                | 3.349775000  | -1.412212000 | 3.308519000  | 1 | -4.890525000 | 7.784276000  | 4.774313000  |
| 1                                | 3.494029000  | -1.378715000 | 1.546581000  | 6 | -6.789643000 | 6.824422000  | 4.881320000  |
| 6                                | 5.131065000  | -0.410839000 | 2.579693000  | 1 | -7.225085000 | 7.828348000  | 4.903170000  |
| 1                                | 5.484054000  | 0.127691000  | 1.695451000  | 1 | -7.306657000 | 6.261154000  | 4.100837000  |
| 1                                | 5.706315000  | -1.343438000 | 2.628607000  | 6 | -6.970217000 | 6.165366000  | 6.259165000  |
| 6                                | 5.445883000  | 0.365633000  | 3.855089000  | 1 | -6.429296000 | 6.759068000  | 7.006479000  |
| 8                                | 5.186150000  | -0.080073000 | 4.974943000  | 1 | -8.035283000 | 6.235466000  | 6.520519000  |
| 7                                | 6.047663000  | 1.578050000  | 3.681240000  | 6 | -6.511305000 | 4.701841000  | 6.360687000  |
| 1                                | 6.166312000  | 1.950723000  | 2.740033000  | 1 | -6.596210000 | 4.380275000  | 7.406397000  |
| 6                                | 6.443032000  | 2.372098000  | 4.827494000  | 1 | -5.450687000 | 4.617764000  | 6.094854000  |
|                                  |              |              |              | 6 | -7.334727000 | 3.743779000  | 5.485481000  |
|                                  |              |              |              | 1 | -8.398949000 | 3.830647000  | 5.729585000  |





|    |              |              |              |   |              |              |              |
|----|--------------|--------------|--------------|---|--------------|--------------|--------------|
| 6  | -1.999794000 | -1.342130000 | 2.630147000  | 1 | -1.608163000 | 5.415190000  | -0.286476000 |
| 6  | -3.236172000 | -0.645042000 | 3.202144000  | 1 | 0.372216000  | 6.817814000  | -1.002209000 |
| 8  | -3.555296000 | 0.489297000  | 2.659133000  | 6 | -1.691746000 | 8.536064000  | 0.844436000  |
| 8  | -3.849094000 | -1.152894000 | 4.161463000  | 6 | -0.479995000 | 8.445078000  | 0.097122000  |
| 1  | -2.141269000 | -3.009389000 | 3.984374000  | 6 | -2.014023000 | 9.761315000  | 1.459952000  |
| 1  | -2.730170000 | -3.364223000 | 2.369697000  | 6 | 0.405861000  | 9.523344000  | -0.035397000 |
| 1  | -1.118615000 | -0.845249000 | 3.061137000  | 6 | -1.142367000 | 10.836830000 | 1.325182000  |
| 1  | -1.950337000 | -1.149013000 | 1.553294000  | 6 | 0.058278000  | 10.717619000 | 0.589234000  |
| 16 | 1.685032000  | -6.951784000 | -0.086508000 | 1 | -2.931158000 | 9.869040000  | 2.035136000  |
| 1  | 2.862602000  | -7.568534000 | -0.336877000 | 1 | -1.383364000 | 11.785819000 | 1.797680000  |
| 8  | 3.037774000  | -2.995045000 | -0.225591000 | 1 | 0.721298000  | 11.575242000 | 0.509063000  |
| 7  | 2.877637000  | 1.251944000  | 1.929692000  | 1 | 1.331707000  | 9.407573000  | -0.592994000 |
| 1  | 3.822014000  | 1.361367000  | 1.573794000  | 6 | -4.834658000 | 6.001721000  | 3.452347000  |
| 1  | 2.358549000  | 2.118159000  | 2.039528000  | 8 | -5.334342000 | 4.909276000  | 3.137005000  |
| 6  | 2.552350000  | 0.242108000  | 2.781155000  | 7 | -5.474422000 | 6.912270000  | 4.214238000  |
| 8  | 1.487463000  | 0.230955000  | 3.409040000  | 1 | -4.985743000 | 7.766363000  | 4.448475000  |
| 6  | 3.544824000  | -0.913349000 | 2.886145000  | 6 | -6.851405000 | 6.765480000  | 4.684957000  |
| 1  | 3.255966000  | -1.492342000 | 3.765436000  | 1 | -7.320483000 | 7.752987000  | 4.632234000  |
| 1  | 3.414632000  | -1.560649000 | 2.009010000  | 1 | -7.368124000 | 6.118430000  | 3.972277000  |
| 6  | 5.028476000  | -0.508088000 | 2.989932000  | 6 | -6.970294000 | 6.224276000  | 6.119731000  |
| 1  | 5.377762000  | -0.017916000 | 2.077043000  | 1 | -6.418995000 | 6.891685000  | 6.793592000  |
| 1  | 5.618456000  | -1.426262000 | 3.099529000  | 1 | -8.027190000 | 6.294333000  | 6.412646000  |
| 6  | 5.320358000  | 0.348066000  | 4.220417000  | 6 | -6.473318000 | 4.785260000  | 6.329135000  |
| 8  | 5.051615000  | -0.034944000 | 5.360805000  | 1 | -6.498106000 | 4.557703000  | 7.402294000  |
| 7  | 5.916984000  | 1.551688000  | 3.979038000  | 1 | -5.426002000 | 4.697526000  | 6.016562000  |
| 1  | 6.036926000  | 1.865559000  | 3.016958000  | 6 | -7.319148000 | 3.738015000  | 5.587916000  |
| 6  | 6.312874000  | 2.414817000  | 5.075104000  | 1 | -8.369095000 | 3.821183000  | 5.888038000  |
| 1  | 6.717012000  | 1.810267000  | 5.889423000  | 1 | -7.282978000 | 3.896244000  | 4.508147000  |
| 1  | 7.103055000  | 3.086107000  | 4.721444000  | 7 | -6.909475000 | 2.360218000  | 5.860669000  |
| 6  | 5.198764000  | 3.276078000  | 5.695942000  | 1 | -7.203427000 | 1.965116000  | 6.743738000  |
| 8  | 5.228653000  | 3.582981000  | 6.888859000  | 6 | -5.995062000 | 1.651869000  | 5.165982000  |
| 7  | 4.243954000  | 3.711173000  | 4.838186000  | 7 | -5.389933000 | 2.153140000  | 4.088097000  |
| 1  | 4.210649000  | 3.348158000  | 3.891604000  | 1 | -5.419678000 | 3.144192000  | 3.850354000  |
| 6  | 3.039150000  | 4.385981000  | 5.286708000  | 1 | -4.715072000 | 1.557503000  | 3.583987000  |
| 1  | 2.671114000  | 3.875809000  | 6.185819000  | 7 | -5.702270000 | 0.404399000  | 5.558827000  |
| 6  | 3.262685000  | 5.874811000  | 5.688418000  | 1 | -6.289461000 | -0.056193000 | 6.239057000  |
| 1  | 4.012858000  | 5.856464000  | 6.484187000  | 1 | -5.034471000 | -0.177724000 | 5.016321000  |
| 1  | 2.331652000  | 6.241266000  | 6.138032000  | 6 | -7.745210000 | 4.769137000  | -1.410704000 |
| 6  | 3.694076000  | 6.801387000  | 4.574544000  | 1 | -7.947026000 | 5.695017000  | -0.861688000 |
| 6  | 5.054661000  | 7.017236000  | 4.311527000  | 1 | -8.557782000 | 4.065903000  | -1.190574000 |
| 6  | 2.743612000  | 7.478273000  | 3.793836000  | 1 | -7.782859000 | 5.000626000  | -2.481997000 |
| 6  | 5.458034000  | 7.885349000  | 3.294147000  | 6 | -6.382752000 | 4.188356000  | -1.019559000 |
| 6  | 3.143142000  | 8.343703000  | 2.773236000  | 1 | -6.344452000 | 4.010235000  | 0.063088000  |
| 6  | 4.502494000  | 8.551164000  | 2.521916000  | 1 | -5.588417000 | 4.911427000  | -1.243139000 |
| 1  | 5.801595000  | 6.511238000  | 4.918274000  | 6 | -6.074343000 | 2.883299000  | -1.770304000 |
| 1  | 1.683624000  | 7.329287000  | 3.989749000  | 1 | -6.857433000 | 2.135142000  | -1.594072000 |
| 1  | 6.517171000  | 8.046827000  | 3.110240000  | 1 | -6.068870000 | 3.070026000  | -2.848346000 |
| 1  | 2.394385000  | 8.858571000  | 2.177080000  | 7 | -4.767209000 | 2.316331000  | -1.444014000 |
| 1  | 4.812822000  | 9.227686000  | 1.730283000  | 1 | -3.967250000 | 2.584193000  | -2.037084000 |
| 6  | 1.998129000  | 4.218248000  | 4.169913000  | 6 | -4.483038000 | 1.596784000  | -0.354262000 |
| 8  | 2.335655000  | 3.896927000  | 3.023594000  | 7 | -3.213357000 | 1.243802000  | -0.101828000 |
| 7  | 0.713760000  | 4.416784000  | 4.532027000  | 1 | -5.141925000 | 0.758550000  | 1.367114000  |
| 1  | 0.507152000  | 4.823271000  | 5.435394000  | 1 | -6.400155000 | 1.448000000  | 0.385641000  |
| 6  | -0.390773000 | 4.266560000  | 3.604044000  | 7 | -5.444206000 | 1.142830000  | 0.474818000  |
| 1  | 0.023322000  | 4.337966000  | 2.592763000  | 1 | -3.046656000 | 0.857885000  | 0.829412000  |
| 6  | -1.017104000 | 2.851559000  | 3.730406000  | 1 | -2.464920000 | 1.815956000  | -0.517280000 |
| 1  | -0.185453000 | 2.139883000  | 3.637193000  | 6 | -8.496446000 | 7.418181000  | -5.712346000 |
| 8  | -1.896849000 | 2.702483000  | 2.612146000  | 1 | -8.870585000 | 6.601608000  | -6.340862000 |
| 1  | -2.400801000 | 1.861451000  | 2.706081000  | 1 | -9.177982000 | 8.270374000  | -5.821237000 |
| 6  | -1.730564000 | 2.617599000  | 5.063207000  | 1 | -8.537314000 | 7.081810000  | -4.669564000 |
| 1  | -1.041217000 | 2.755750000  | 5.903382000  | 6 | -7.059854000 | 7.804658000  | -6.109610000 |
| 1  | -2.110427000 | 1.591794000  | 5.115497000  | 6 | -6.076452000 | 6.659758000  | -5.976511000 |
| 1  | -2.578217000 | 3.301125000  | 5.184346000  | 6 | -5.384450000 | 6.429743000  | -4.779609000 |
| 6  | -1.362173000 | 5.451667000  | 3.782193000  | 6 | -5.848486000 | 5.768510000  | -7.036560000 |
| 8  | -1.064562000 | 6.426002000  | 4.478554000  | 6 | -4.504172000 | 5.355529000  | -4.634027000 |
| 7  | -2.514051000 | 5.335338000  | 3.081090000  | 6 | -4.975240000 | 4.689806000  | -6.910942000 |
| 1  | -2.678251000 | 4.443813000  | 2.612318000  | 6 | -4.296233000 | 4.470097000  | -5.703420000 |
| 6  | -3.460069000 | 6.420731000  | 2.917872000  | 8 | -3.457215000 | 3.402342000  | -5.625692000 |
| 1  | -3.065235000 | 7.267206000  | 3.484252000  | 1 | -3.090299000 | 3.320587000  | -4.709565000 |
| 6  | -3.608860000 | 6.814004000  | 1.414654000  | 1 | -6.731236000 | 8.645692000  | -5.485477000 |
| 1  | -4.361196000 | 7.611986000  | 1.354058000  | 1 | -7.062399000 | 8.168558000  | -7.145233000 |
| 1  | -4.027874000 | 5.947448000  | 0.889066000  | 1 | -5.526701000 | 7.109586000  | -3.941529000 |
| 6  | -2.326696000 | 7.243147000  | 0.767243000  | 1 | -6.363333000 | 5.922960000  | -7.983034000 |
| 6  | -1.495476000 | 6.454158000  | -0.001707000 | 1 | -3.967786000 | 5.203504000  | -3.701578000 |
| 7  | -0.393133000 | 7.168433000  | -0.408861000 | 1 | -4.805404000 | 4.007957000  | -7.739508000 |



|   |              |              |              |   |              |             |              |
|---|--------------|--------------|--------------|---|--------------|-------------|--------------|
| 1 | 4.793970000  | 9.268784000  | 1.994143000  | 1 | -3.971690000 | 2.977925000 | -2.003403000 |
| 6 | 2.045472000  | 4.100189000  | 4.160604000  | 6 | -4.520760000 | 1.915909000 | -0.381940000 |
| 8 | 2.356671000  | 3.827546000  | 2.994528000  | 7 | -3.274578000 | 1.456748000 | -0.192966000 |
| 7 | 0.770492000  | 4.304247000  | 4.553166000  | 1 | -5.201611000 | 0.984377000 | 1.280544000  |
| 1 | 0.584761000  | 4.674936000  | 5.476344000  | 1 | -6.419833000 | 1.858945000 | 0.410932000  |
| 6 | -0.350189000 | 4.223221000  | 3.634833000  | 7 | -5.496170000 | 1.456608000 | 0.429629000  |
| 1 | 0.048441000  | 4.350936000  | 2.622703000  | 1 | -3.111509000 | 0.979936000 | 0.696692000  |
| 6 | -0.991961000 | 2.810534000  | 3.686009000  | 1 | -2.495505000 | 2.005481000 | -0.583239000 |
| 1 | -0.169690000 | 2.097445000  | 3.535887000  | 6 | -8.716207000 | 6.935032000 | -6.256527000 |
| 8 | -1.890984000 | 2.738911000  | 2.576280000  | 1 | -9.001709000 | 6.035215000 | -6.813837000 |
| 1 | -2.381881000 | 1.885413000  | 2.612094000  | 1 | -9.458494000 | 7.714477000 | -6.466246000 |
| 6 | -1.685892000 | 2.505106000  | 5.014898000  | 1 | -8.767503000 | 6.695347000 | -5.187841000 |
| 1 | -0.979358000 | 2.578489000  | 5.848906000  | 6 | -7.300998000 | 7.399255000 | -6.648151000 |
| 1 | -2.083642000 | 1.484814000  | 5.010039000  | 6 | -6.237241000 | 6.353729000 | -6.381368000 |
| 1 | -2.518498000 | 3.194297000  | 5.194227000  | 6 | -5.536700000 | 6.318056000 | -5.168168000 |
| 6 | -1.303769000 | 5.407408000  | 3.899020000  | 6 | -5.942154000 | 5.359932000 | -7.327786000 |
| 8 | -0.981890000 | 6.334297000  | 4.647260000  | 6 | -4.585267000 | 5.331685000 | -4.897216000 |
| 7 | -2.469001000 | 5.349611000  | 3.211300000  | 6 | -4.998694000 | 4.366033000 | -7.075765000 |
| 1 | -2.648025000 | 4.494263000  | 2.684537000  | 6 | -4.313690000 | 4.339029000 | -5.851799000 |
| 6 | -3.388567000 | 6.466181000  | 3.107965000  | 8 | -3.407574000 | 3.346192000 | -5.646806000 |
| 1 | -2.967455000 | 7.275134000  | 3.709071000  | 1 | -3.051051000 | 3.391237000 | -4.724017000 |
| 6 | -3.544426000 | 6.928380000  | 1.624928000  | 1 | -7.060389000 | 8.317224000 | -6.096729000 |
| 1 | -4.273960000 | 7.749514000  | 1.610420000  | 1 | -7.296236000 | 7.666151000 | -7.713044000 |
| 1 | -3.997729000 | 6.097563000  | 1.071403000  | 1 | -5.729539000 | 7.082432000 | -4.417586000 |
| 6 | -2.263057000 | 7.346172000  | 0.971066000  | 1 | -6.461575000 | 5.364000000 | -8.284273000 |
| 6 | -1.474984000 | 6.568858000  | 0.146778000  | 1 | -4.041755000 | 5.331832000 | -3.956390000 |
| 7 | -0.364143000 | 7.269424000  | -0.259227000 | 1 | -4.778896000 | 3.602319000 | -7.816499000 |
| 1 | -1.624102000 | 5.547236000  | -0.180901000 | 8 | 1.750500000  | 6.194203000 | -1.813114000 |
| 1 | 0.372048000  | 6.917760000  | -0.888149000 | 8 | 3.199985000  | 7.702283000 | -1.002728000 |
| 6 | -1.590319000 | 8.616406000  | 1.086038000  | 6 | 2.830400000  | 6.532690000 | -1.177117000 |
| 6 | -0.401452000 | 8.525392000  | 0.302962000  | 6 | 3.631620000  | 5.371774000 | -0.561124000 |
| 6 | -1.862991000 | 9.821388000  | 1.762610000  | 1 | 3.035956000  | 4.994856000 | 0.284195000  |
| 6 | 0.510418000  | 9.584464000  | 0.194080000  | 1 | 3.684250000  | 4.546839000 | -1.282872000 |
| 6 | -0.966127000 | 10.878478000 | 1.650514000  | 6 | 5.028272000  | 5.756569000 | -0.067883000 |
| 6 | 0.211484000  | 10.759294000 | 0.878104000  | 1 | 4.947171000  | 6.675372000 | 0.519068000  |
| 1 | -2.761448000 | 9.927328000  | 2.366925000  | 1 | 5.672033000  | 6.014624000 | -0.920597000 |
| 1 | -1.168460000 | 11.811976000 | 2.169771000  | 6 | 5.683734000  | 4.685121000 | 0.819930000  |
| 1 | 0.895928000  | 11.601628000 | 0.817384000  | 1 | 5.070935000  | 4.522270000 | 1.711805000  |
| 1 | 1.419347000  | 9.465185000  | -0.389522000 | 1 | 6.660048000  | 5.045595000 | 1.173912000  |
| 6 | -4.775184000 | 6.063448000  | 3.622260000  | 6 | 5.916908000  | 3.309140000 | 0.206143000  |
| 8 | -5.318543000 | 5.020316000  | 3.221675000  | 8 | 5.810174000  | 2.270862000 | 0.887866000  |
| 7 | -5.382015000 | 6.936090000  | 4.452293000  | 7 | 6.272938000  | 3.273932000 | -1.095273000 |
| 1 | -4.863086000 | 7.752613000  | 4.747869000  | 1 | 6.359323000  | 4.152064000 | -1.589849000 |
| 6 | -6.777208000 | 6.823562000  | 4.881966000  | 6 | 6.604168000  | 2.055179000 | -1.822908000 |
| 1 | -7.190080000 | 7.836827000  | 4.907406000  | 1 | 5.950120000  | 1.974163000 | -2.698295000 |
| 1 | -7.310335000 | 6.273302000  | 4.102954000  | 1 | 6.381611000  | 1.220830000 | -1.156158000 |
| 6 | -6.970213000 | 6.165371000  | 6.259162000  | 6 | 8.083438000  | 2.002006000 | -2.260715000 |
| 1 | -6.428954000 | 6.753793000  | 7.010356000  | 1 | 8.252571000  | 1.020348000 | -2.719727000 |
| 1 | -8.036343000 | 6.243564000  | 6.513402000  | 1 | 8.713355000  | 2.053713000 | -1.365067000 |
| 6 | -6.521562000 | 4.698607000  | 6.360236000  | 6 | 8.463325000  | 3.098967000 | -3.233907000 |
| 1 | -6.620184000 | 4.373182000  | 7.403560000  | 6 | 8.264120000  | 2.932169000 | -4.613421000 |
| 1 | -5.458320000 | 4.610604000  | 6.106171000  | 6 | 8.987328000  | 4.319190000 | -2.780507000 |
| 6 | -7.338010000 | 3.748183000  | 5.470312000  | 6 | 8.572546000  | 3.954521000 | -5.512565000 |
| 1 | -8.404901000 | 3.837381000  | 5.701611000  | 6 | 9.295502000  | 5.346250000 | -3.677065000 |
| 1 | -7.215162000 | 4.000465000  | 4.415751000  | 6 | 9.087672000  | 5.167430000 | -5.046364000 |
| 7 | -6.983897000 | 2.340044000  | 5.648654000  | 1 | 7.872830000  | 1.987729000 | -4.986111000 |
| 1 | -7.350719000 | 1.883615000  | 6.472886000  | 1 | 9.164622000  | 4.462003000 | -1.716990000 |
| 6 | -6.044763000 | 1.654992000  | 4.962165000  | 1 | 8.415333000  | 3.802478000 | -6.577199000 |
| 7 | -5.349864000 | 2.211638000  | 3.969098000  | 1 | 9.702656000  | 6.282656000 | -3.304774000 |
| 1 | -5.358560000 | 3.214491000  | 3.784408000  | 1 | 9.330021000  | 5.963394000 | -5.745208000 |
| 1 | -4.668268000 | 1.627521000  | 3.462925000  | 7 | 1.010167000  | 3.757705000 | -2.370228000 |
| 7 | -5.821241000 | 0.373376000  | 5.280476000  | 1 | 0.647973000  | 3.335283000 | -1.496647000 |
| 1 | -6.456581000 | -0.105412000 | 5.902321000  | 1 | 1.750009000  | 3.154202000 | -2.738249000 |
| 1 | -5.134064000 | -0.197342000 | 4.747818000  | 1 | 1.409859000  | 4.755693000 | -2.125428000 |
| 6 | -7.598913000 | 5.379350000  | -1.308407000 | 6 | -0.174237000 | 3.822114000 | -3.290574000 |
| 1 | -7.733974000 | 6.311243000  | -0.749452000 | 1 | -0.325352000 | 4.873921000 | -3.551832000 |
| 1 | -8.460731000 | 4.734236000  | -1.097775000 | 6 | -1.411176000 | 3.357510000 | -2.479008000 |
| 1 | -7.616365000 | 5.623400000  | -2.377409000 | 8 | -2.519699000 | 3.309742000 | -3.085160000 |
| 6 | -6.281202000 | 4.697173000  | -0.920249000 | 8 | -1.215611000 | 3.076040000 | -1.269396000 |
| 1 | -6.260615000 | 4.500017000  | 0.159807000  | 6 | 0.049414000  | 3.009974000 | -4.585294000 |
| 1 | -5.438792000 | 5.368508000  | -1.129316000 | 1 | -0.877400000 | 3.072161000 | -5.162986000 |
| 6 | -6.056211000 | 3.385202000  | -1.690536000 | 1 | 0.813422000  | 3.521257000 | -5.181843000 |
| 1 | -6.873839000 | 2.677430000  | -1.506454000 | 6 | 0.461185000  | 1.579141000 | -4.359262000 |
| 1 | -6.062623000 | 3.585213000  | -2.766473000 | 6 | -0.327949000 | 0.532526000 | -3.922234000 |
| 7 | -4.774032000 | 2.745082000  | -1.398714000 | 1 | -1.382604000 | 0.504708000 | -3.688708000 |

|                                 |              |              |              |   |              |              |              |
|---------------------------------|--------------|--------------|--------------|---|--------------|--------------|--------------|
| 7                               | 0.447302000  | -0.598637000 | -3.801072000 | 1 | 6.757942000  | -0.411410000 | 4.021889000  |
| 1                               | 0.100693000  | -1.517335000 | -3.541940000 | 6 | 6.044316000  | 1.352853000  | 4.948781000  |
| 6                               | 1.732547000  | -0.316642000 | -4.165235000 | 8 | 5.769249000  | 1.045357000  | 6.110035000  |
| 6                               | 1.791150000  | 1.042490000  | -4.514386000 | 7 | 6.454386000  | 2.607410000  | 4.604905000  |
| 6                               | 3.033382000  | 1.626376000  | -4.886372000 | 1 | 6.563427000  | 2.847023000  | 3.621261000  |
| 6                               | 4.193992000  | 0.822405000  | -4.840563000 | 6 | 6.636843000  | 3.628861000  | 5.617796000  |
| 6                               | 2.885797000  | -1.230948000 | -4.212114000 | 1 | 7.099145000  | 3.188508000  | 6.503399000  |
| 6                               | 4.163755000  | -0.507538000 | -4.482300000 | 1 | 7.315741000  | 4.391889000  | 5.222020000  |
| 1                               | 3.100795000  | 2.667046000  | -5.188019000 | 6 | 5.363093000  | 4.337673000  | 6.108257000  |
| 1                               | 5.152304000  | 1.274591000  | -5.082670000 | 8 | 5.299812000  | 4.790387000  | 7.252911000  |
| 1                               | 2.954066000  | -1.913710000 | -3.355014000 | 7 | 4.374682000  | 4.481206000  | 5.194120000  |
| 1                               | 5.074544000  | -1.092735000 | -4.441511000 | 1 | 4.436873000  | 4.021486000  | 4.292001000  |
| 7                               | 2.694230000  | -2.348151000 | -5.385607000 | 6 | 3.073964000  | 5.030709000  | 5.528525000  |
| 8                               | 3.687680000  | -2.999860000 | -5.678294000 | 1 | 2.740023000  | 4.585825000  | 6.474525000  |
| 8                               | 1.579087000  | -2.505022000 | -5.863226000 | 6 | 3.089660000  | 6.574647000  | 5.748678000  |
| <b>4TSS<sub>B,C7-endo</sub></b> |              |              |              |   |              |              |              |
| 26                              | 0.925860000  | -4.680558000 | -1.840317000 | 1 | 3.799471000  | 6.749621000  | 6.561949000  |
| 7                               | 0.761705000  | -3.870909000 | 0.014918000  | 1 | 2.101930000  | 6.872166000  | 6.121053000  |
| 7                               | 2.941706000  | -4.619267000 | -1.703802000 | 6 | 3.454717000  | 7.402263000  | 4.537184000  |
| 7                               | 1.092799000  | -5.675475000 | -3.586878000 | 6 | 4.792944000  | 7.727775000  | 4.270944000  |
| 7                               | -1.094049000 | -4.865294000 | -1.919034000 | 6 | 2.463287000  | 7.868477000  | 3.659377000  |
| 6                               | -0.390432000 | -3.612512000 | 0.707873000  | 6 | 5.134481000  | 8.493536000  | 3.153352000  |
| 6                               | -0.082826000 | -2.977151000 | 1.985064000  | 6 | 2.801750000  | 8.631018000  | 2.539303000  |
| 6                               | 1.274943000  | -2.857304000 | 2.022231000  | 6 | 4.139172000  | 8.946036000  | 2.283313000  |
| 6                               | 1.791720000  | -3.418571000 | 0.794367000  | 1 | 5.569504000  | 7.390530000  | 4.952974000  |
| 6                               | 3.666283000  | -4.049040000 | -0.690357000 | 1 | 1.418966000  | 7.636276000  | 3.857837000  |
| 6                               | 5.080135000  | -4.149475000 | -0.975748000 | 1 | 6.176130000  | 8.742719000  | 2.967453000  |
| 6                               | 5.195926000  | -4.797831000 | -2.168607000 | 1 | 2.022490000  | 8.983012000  | 1.868665000  |
| 6                               | 3.851943000  | -5.088930000 | -2.614773000 | 1 | 4.400905000  | 9.539989000  | 1.412223000  |
| 6                               | 2.249019000  | -6.039173000 | -4.229494000 | 6 | 2.104595000  | 4.597300000  | 4.419191000  |
| 6                               | 1.937898000  | -6.737073000 | -5.455100000 | 8 | 2.514922000  | 4.115439000  | 3.356921000  |
| 6                               | 0.579827000  | -6.783525000 | -5.546406000 | 7 | 0.792464000  | 4.755191000  | 4.695703000  |
| 6                               | 0.059632000  | -6.118266000 | -4.374331000 | 1 | 0.509205000  | 5.329276000  | 5.481036000  |
| 6                               | -1.823982000 | -5.390860000 | -2.950953000 | 6 | -0.241233000 | 4.447552000  | 3.726192000  |
| 6                               | -3.237141000 | -5.301869000 | -2.654320000 | 1 | 0.205963000  | 4.508573000  | 2.727749000  |
| 6                               | -3.342401000 | -4.728007000 | -1.423483000 | 6 | -0.745013000 | 2.989467000  | 3.896213000  |
| 6                               | -1.993651000 | -4.460705000 | -0.972693000 | 1 | 0.150520000  | 2.351343000  | 3.879887000  |
| 6                               | -1.675182000 | -3.892392000 | 0.257254000  | 8 | -1.543984000 | 2.713918000  | 2.743259000  |
| 6                               | 3.141259000  | -3.486538000 | 0.468875000  | 1 | -2.119690000 | 1.932483000  | 2.909623000  |
| 6                               | 3.538623000  | -5.766553000 | -3.787123000 | 6 | -1.495970000 | 2.751319000  | 5.205791000  |
| 6                               | -1.295245000 | -5.972206000 | -4.097575000 | 1 | -0.858103000 | 2.994213000  | 6.062218000  |
| 1                               | -2.505160000 | -3.645102000 | 0.911095000  | 1 | -1.783377000 | 1.698241000  | 5.295138000  |
| 1                               | 3.847692000  | -3.085788000 | 1.189747000  | 1 | -2.405045000 | 3.360335000  | 5.257522000  |
| 1                               | 4.362514000  | -6.100087000 | -4.410491000 | 6 | -1.325912000 | 5.541651000  | 3.811616000  |
| 1                               | -1.996979000 | -6.366715000 | -4.826374000 | 8 | -1.158373000 | 6.553193000  | 4.500691000  |
| 1                               | 1.874730000  | -2.397275000 | 2.798913000  | 7 | -2.413851000 | 5.309929000  | 3.044420000  |
| 1                               | 5.865849000  | -3.775466000 | -0.330984000 | 1 | -2.467236000 | 4.393965000  | 2.597836000  |
| 1                               | 6.095942000  | -5.066996000 | -2.707534000 | 6 | -3.447159000 | 6.297351000  | 2.796770000  |
| 1                               | 2.675628000  | -7.125863000 | -6.145821000 | 1 | -3.118737000 | 7.221974000  | 3.276972000  |
| 1                               | -0.030358000 | -7.221162000 | -6.326726000 | 6 | -3.630783000 | 6.531591000  | 1.265975000  |
| 1                               | -4.027291000 | -5.647360000 | -3.309483000 | 1 | -4.446475000 | 7.255192000  | 1.136557000  |
| 1                               | -4.237420000 | -4.502076000 | -0.856965000 | 1 | -3.977968000 | 5.587764000  | 0.828501000  |
| 6                               | -1.089935000 | -2.458835000 | 2.971589000  | 6 | -2.386879000 | 7.003498000  | 0.575201000  |
| 6                               | -1.659169000 | -1.113105000 | 2.496924000  | 6 | -1.459320000 | 6.211139000  | -0.070005000 |
| 6                               | -2.765109000 | -0.501286000 | 3.351067000  | 7 | -0.420040000 | 6.974756000  | -0.546442000 |
| 8                               | -3.289468000 | 0.578371000  | 2.855113000  | 1 | -1.461235000 | 5.138981000  | -0.222650000 |
| 8                               | -3.097430000 | -1.005907000 | 4.439725000  | 1 | 0.402503000  | 6.621051000  | -1.056922000 |
| 1                               | -0.619500000 | -2.331016000 | 3.951949000  | 6 | -1.883467000 | 8.352780000  | 0.496471000  |
| 1                               | -1.910683000 | -3.172557000 | 3.110898000  | 6 | -0.645856000 | 8.290020000  | -0.210971000 |
| 1                               | -0.849050000 | -0.373441000 | 2.435219000  | 6 | -2.342079000 | 9.607335000  | 0.943381000  |
| 1                               | -2.044424000 | -1.206742000 | 1.474427000  | 6 | 0.134653000  | 9.426705000  | -0.464074000 |
| 16                              | 0.948840000  | -6.852174000 | -0.634430000 | 6 | -1.575851000 | 10.739431000 | 0.686584000  |
| 1                               | 1.585542000  | -7.605975000 | -1.560047000 | 6 | -0.347050000 | 10.649396000 | -0.005680000 |
| 8                               | 0.823313000  | -3.136941000 | -2.531255000 | 1 | -3.282710000 | 9.694263000  | 1.483051000  |
| 7                               | 3.577782000  | 1.512577000  | 2.590478000  | 1 | -1.922713000 | 11.711415000 | 1.028453000  |
| 1                               | 4.497668000  | 1.842933000  | 2.315752000  | 1 | 0.231947000  | 11.552126000 | -0.182859000 |
| 1                               | 2.844439000  | 2.213683000  | 2.565241000  | 1 | 1.084473000  | 9.334436000  | -0.984315000 |
| 6                               | 3.401823000  | 0.469033000  | 3.440782000  | 6 | -4.779134000 | 5.821017000  | 3.390124000  |
| 8                               | 2.298187000  | 0.187561000  | 3.919030000  | 8 | -5.195284000 | 4.672677000  | 3.170830000  |
| 6                               | 4.629127000  | -0.393106000 | 3.743515000  | 7 | -5.474165000 | 6.734496000  | 4.098714000  |
| 1                               | 4.428918000  | -0.888212000 | 4.696544000  | 1 | -5.050490000 | 7.638373000  | 4.262317000  |
| 1                               | 4.684188000  | -1.177551000 | 2.977469000  | 6 | -6.809309000 | 6.496773000  | 6.444358000  |
| 6                               | 5.982816000  | 0.335734000  | 3.810543000  | 1 | -7.393471000 | 7.411269000  | 4.499865000  |
| 1                               | 6.245106000  | 0.795433000  | 2.853908000  | 1 | -7.267719000 | 5.713510000  | 4.036568000  |
|                                 |              |              |              | 6 | -6.808230000 | 6.124397000  | 6.136437000  |
|                                 |              |              |              | 1 | -6.311836000 | 6.927840000  | 6.694852000  |

|    |                           |              |              |   |              |              |              |
|----|---------------------------|--------------|--------------|---|--------------|--------------|--------------|
| 1  | -7.852216000              | 6.112437000  | 6.479295000  | 1 | 8.088065000  | 1.330360000  | 0.025137000  |
| 6  | -6.134266000              | 4.788088000  | 6.484156000  | 6 | 8.387801000  | 1.715638000  | -2.075612000 |
| 1  | -6.011777000              | 4.724894000  | 7.572606000  | 6 | 8.299795000  | 1.148481000  | -3.356329000 |
| 1  | -5.125510000              | 4.751831000  | 6.056001000  | 6 | 9.219035000  | 2.831392000  | -1.897854000 |
| 6  | -6.938647000              | 3.565902000  | 6.014979000  | 6 | 9.015534000  | 1.682588000  | -4.429551000 |
| 1  | -7.931503000              | 3.570879000  | 6.476919000  | 6 | 9.936982000  | 3.369832000  | -2.968936000 |
| 1  | -7.094087000              | 3.583253000  | 4.933343000  | 6 | 9.836446000  | 2.797575000  | -4.239179000 |
| 7  | -6.312919000              | 2.289694000  | 6.360894000  | 1 | 7.670941000  | 0.273993000  | -3.510892000 |
| 1  | -6.400326000              | 1.981057000  | 7.319782000  | 1 | 9.309816000  | 3.277102000  | -0.910102000 |
| 6  | -5.434421000              | 1.617600000  | 5.587236000  | 1 | 8.936174000  | 1.225171000  | -5.412292000 |
| 7  | -5.086551000              | 2.065444000  | 4.383094000  | 1 | 10.577920000 | 4.233019000  | -2.809040000 |
| 1  | -5.238779000              | 3.030137000  | 4.090268000  | 1 | 10.396754000 | 3.212920000  | -5.072483000 |
| 1  | -4.430737000              | 1.498310000  | 3.818253000  | 7 | 1.284260000  | 3.431015000  | -2.220959000 |
| 7  | -4.921523000              | 0.459934000  | 6.032285000  | 1 | 0.891887000  | 3.010447000  | -1.358558000 |
| 1  | -5.351950000              | -0.008166000 | 6.817014000  | 1 | 1.992172000  | 2.796680000  | -2.597549000 |
| 1  | -4.273016000              | -0.088503000 | 5.437238000  | 1 | 1.703657000  | 4.409069000  | -1.976178000 |
| 6  | -7.674161000              | 4.218524000  | -1.751210000 | 6 | 0.105482000  | 3.598210000  | -3.140000000 |
| 1  | -7.989344000              | 5.154201000  | -1.277186000 | 1 | -0.033807000 | 4.677564000  | -3.258029000 |
| 1  | -8.416756000              | 3.450704000  | -1.501440000 | 6 | -1.134814000 | 3.049944000  | -2.387388000 |
| 1  | -7.700956000              | 4.369337000  | -2.837225000 | 8 | -2.235485000 | 3.013548000  | -3.005600000 |
| 6  | -6.275200000              | 3.812528000  | -1.282867000 | 8 | -0.945751000 | 2.716354000  | -1.189106000 |
| 1  | -6.261164000              | 3.700556000  | -0.191643000 | 6 | 0.337110000  | 2.982367000  | -4.534990000 |
| 1  | -5.551430000              | 4.599312000  | -1.529832000 | 1 | -0.482732000 | 3.334082000  | -5.167579000 |
| 6  | -5.811811000              | 2.500611000  | -1.934032000 | 1 | 1.251447000  | 3.425608000  | -4.950302000 |
| 1  | -6.550616000              | 1.705796000  | -1.769290000 | 6 | 0.402441000  | 1.479552000  | -4.594101000 |
| 1  | -5.738538000              | 2.624642000  | -3.018546000 | 6 | -0.666808000 | 0.641469000  | -4.824597000 |
| 7  | -4.495722000              | 2.053471000  | -1.481737000 | 1 | -1.704958000 | 0.878717000  | -5.005248000 |
| 1  | -3.677608000              | 2.370561000  | -2.022687000 | 7 | -0.229459000 | -0.665159000 | -4.828479000 |
| 6  | -4.245226000              | 1.515055000  | -0.282178000 | 1 | -0.779553000 | -1.483853000 | -5.046865000 |
| 7  | -2.989330000              | 1.325210000  | 0.120653000  | 6 | 1.117479000  | -0.699000000 | -4.628750000 |
| 1  | -4.979992000              | 0.659217000  | 1.398194000  | 6 | 1.564424000  | 0.628954000  | -4.462592000 |
| 1  | -6.171239000              | 0.969802000  | 0.186693000  | 6 | 2.943480000  | 0.877203000  | -4.249825000 |
| 7  | -5.248169000              | 1.151122000  | 0.551586000  | 6 | 3.826000000  | -0.221492000 | -4.185486000 |
| 1  | -2.863633000              | 1.000912000  | 1.082831000  | 6 | 1.988124000  | -1.879032000 | -4.535532000 |
| 1  | -2.219040000              | 1.821658000  | -0.350760000 | 6 | 3.405750000  | -1.526310000 | -4.355676000 |
| 6  | -7.927795000              | 7.372173000  | -6.067362000 | 1 | 3.335932000  | 1.889508000  | -4.193226000 |
| 1  | -8.291332000              | 6.525611000  | -6.661491000 | 1 | 4.885048000  | -0.033337000 | -0.028115000 |
| 1  | -8.597591000              | 8.222768000  | -6.242390000 | 1 | 1.574862000  | -2.567274000 | -3.600103000 |
| 1  | -8.002459000              | 7.093490000  | -5.009675000 | 1 | 4.120000000  | -2.340676000 | -4.333155000 |
| 6  | -6.476745000              | 7.722963000  | -6.441597000 | 7 | 1.753723000  | -2.866592000 | -5.676289000 |
| 6  | -5.517034000              | 6.574372000  | -6.210903000 | 8 | 2.719171000  | -3.438895000 | -6.170126000 |
| 6  | -4.921392000              | 6.368055000  | -4.958912000 | 8 | 0.584039000  | -3.066923000 | -6.013803000 |
| 6  | -5.225026000              | 5.652727000  | -7.227561000 |   |              |              |              |
| 6  | -4.071480000              | 5.287468000  | -4.719515000 |   |              |              |              |
| 6  | -4.379485000              | 4.566441000  | -7.008631000 |   |              |              |              |
| 6  | -3.796965000              | 4.372789000  | -5.748400000 |   |              |              |              |
| 8  | -2.974353000              | 3.301882000  | -5.577203000 |   |              |              |              |
| 1  | -2.669724000              | 3.254288000  | -4.634067000 |   |              |              |              |
| 1  | -6.157659000              | 8.594682000  | -5.855594000 |   |              |              |              |
| 1  | -6.441912000              | 8.026560000  | -7.495757000 |   |              |              |              |
| 1  | -5.118526000              | 7.070834000  | -4.151403000 |   |              |              |              |
| 1  | -5.666209000              | 5.788311000  | -8.213268000 |   |              |              |              |
| 1  | -3.610377000              | 5.151501000  | -3.745224000 |   |              |              |              |
| 1  | -4.157059000              | 3.860607000  | -7.803998000 |   |              |              |              |
| 8  | 1.903927000               | 5.921811000  | -1.763776000 |   |              |              |              |
| 8  | 3.190619000               | 7.682192000  | -1.235466000 |   |              |              |              |
| 6  | 2.926920000               | 6.471661000  | -1.188706000 |   |              |              |              |
| 6  | 3.803935000               | 5.532364000  | -0.341444000 |   |              |              |              |
| 1  | 3.344932000               | 5.494282000  | 0.658471000  |   |              |              |              |
| 1  | 3.739128000               | 4.513781000  | -0.739212000 |   |              |              |              |
| 6  | 5.263963000               | 5.978877000  | -0.214189000 |   |              |              |              |
| 1  | 5.278518000               | 7.038784000  | 0.054512000  |   |              |              |              |
| 1  | 5.760598000               | 5.918364000  | -1.193456000 |   |              |              |              |
| 6  | 6.061191000               | 5.203342000  | 0.849750000  |   |              |              |              |
| 1  | 5.651099000               | 5.402922000  | 1.845002000  |   |              |              |              |
| 1  | 7.101873000               | 5.556955000  | 0.865180000  |   |              |              |              |
| 6  | 6.100468000               | 3.686786000  | 0.710621000  |   |              |              |              |
| 8  | 6.104644000               | 2.945155000  | 1.713298000  |   |              |              |              |
| 7  | 6.138659000               | 3.180665000  | -0.538325000 |   |              |              |              |
| 1  | 6.180635000               | 3.825340000  | -1.315368000 |   |              |              |              |
| 6  | 6.154770000               | 1.751294000  | -0.829180000 |   |              |              |              |
| 1  | 5.614230000               | 1.596606000  | -1.767988000 |   |              |              |              |
| 1  | 5.600311000               | 1.246998000  | -0.034924000 |   |              |              |              |
| 6  | 7.575758000               | 1.154926000  | -0.927605000 |   |              |              |              |
| 1  | 7.466673000               | 0.069307000  | -1.041069000 |   |              |              |              |
| 5  | INT5 <sub>B,C7-endo</sub> |              |              |   |              |              |              |
| 26 | 2.587459000               | -4.647305000 | -0.116894000 |   |              |              |              |
| 7  | 1.268118000               | -4.245913000 | 1.367125000  |   |              |              |              |
| 7  | 3.729223000               | -5.653516000 | 1.216562000  |   |              |              |              |
| 7  | 3.874011000               | -5.089762000 | -1.615130000 |   |              |              |              |
| 7  | 1.417719000               | -3.713618000 | -1.464665000 |   |              |              |              |
| 6  | 0.083586000               | -3.567540000 | 1.241617000  |   |              |              |              |
| 6  | -0.563905000              | -3.405990000 | 2.538631000  |   |              |              |              |
| 6  | 0.271751000               | -4.004288000 | 3.436372000  |   |              |              |              |
| 6  | 1.397273000               | -4.526001000 | 2.701144000  |   |              |              |              |
| 6  | 3.531588000               | -5.785298000 | 2.563968000  |   |              |              |              |
| 6  | 4.592241000               | -6.561596000 | 3.159435000  |   |              |              |              |
| 6  | 5.441184000               | -6.897882000 | 2.146752000  |   |              |              |              |
| 6  | 4.896084000               | -6.318135000 | 0.942610000  |   |              |              |              |
| 6  | 5.030938000               | -5.817404000 | -1.493714000 |   |              |              |              |
| 6  | 5.718349000               | -5.886133000 | -2.761137000 |   |              |              |              |
| 6  | 4.966709000               | -5.178548000 | -3.651264000 |   |              |              |              |
| 6  | 3.818862000               | -4.692587000 | -2.924820000 |   |              |              |              |
| 6  | 1.656601000               | -3.498764000 | -2.799378000 |   |              |              |              |
| 6  | 0.568716000               | -2.768783000 | -3.404717000 |   |              |              |              |
| 6  | -0.345797000              | -2.559427000 | -2.415186000 |   |              |              |              |
| 6  | 0.198495000               | -3.143213000 | -1.212858000 |   |              |              |              |
| 6  | -0.422042000              | -3.088984000 | 0.035998000  |   |              |              |              |
| 6  | 2.451664000               | -5.241609000 | 3.262056000  |   |              |              |              |
| 6  | 5.495890000               | -6.394460000 | -0.314042000 |   |              |              |              |
| 6  | 2.788109000               | -3.936286000 | -3.487445000 |   |              |              |              |
| 1  | -1.392030000              | -2.604155000 | 0.063782000  |   |              |              |              |
| 1  | 2.425240000               | -5.402392000 | 4.335697000  |   |              |              |              |
| 1  | 6.428884000               | -6.947167000 | -0.376787000 |   |              |              |              |
| 1  | 2.881040000               | -3.647663000 | -4.534740000 |   |              |              |              |
| 1  | 0.138750000               | -4.093959000 | 4.507475000  |   |              |              |              |
| 1  | 4.663369000               | -6.807711000 | 4.211014000  |   |              |              |              |

|    |              |              |              |   |              |              |              |
|----|--------------|--------------|--------------|---|--------------|--------------|--------------|
| 1  | 6.354995000  | -7.475885000 | 2.195854000  | 6 | -3.507917000 | 7.007549000  | 1.657523000  |
| 1  | 6.653610000  | -6.404866000 | -2.928123000 | 1 | -4.232536000 | 7.832722000  | 1.646153000  |
| 1  | 5.151966000  | -4.993695000 | -4.701179000 | 1 | -3.953517000 | 6.190920000  | 1.077001000  |
| 1  | 0.549769000  | -2.470809000 | -4.448947000 | 6 | -2.208483000 | 7.432859000  | 1.043824000  |
| 1  | -1.295025000 | -2.041809000 | -2.471455000 | 6 | -1.380334000 | 6.656266000  | 0.258177000  |
| 6  | -1.875120000 | -2.726536000 | 2.819189000  | 7 | -0.256813000 | 7.360541000  | -0.103605000 |
| 6  | -1.878018000 | -1.203862000 | 2.574565000  | 1 | -1.510299000 | 5.632491000  | -0.070648000 |
| 6  | -3.166123000 | -0.524837000 | 3.051468000  | 1 | 0.514328000  | 7.011277000  | -0.693792000 |
| 8  | -3.486002000 | 0.591013000  | 2.478215000  | 6 | -1.547103000 | 8.706915000  | 1.181624000  |
| 8  | -3.819369000 | -1.047984000 | 3.976841000  | 6 | -0.325155000 | 8.617951000  | 0.451040000  |
| 1  | -2.149479000 | -2.904234000 | 3.862483000  | 6 | -1.853261000 | 9.913773000  | 1.840472000  |
| 1  | -2.669758000 | -3.182479000 | 2.212357000  | 6 | 0.586694000  | 9.680223000  | 0.376515000  |
| 1  | -1.035817000 | -0.742119000 | 3.109144000  | 6 | -0.956604000 | 10.974034000 | 1.762053000  |
| 1  | -1.725163000 | -0.963940000 | 1.518159000  | 6 | 0.253853000  | 10.856613000 | 1.041596000  |
| 16 | 1.392779000  | -6.687594000 | -0.580830000 | 1 | -2.777356000 | 10.018788000 | 2.404971000  |
| 1  | 1.309104000  | -7.167883000 | 0.680192000  | 1 | -1.184953000 | 11.909000000 | 2.267692000  |
| 8  | 3.496467000  | -3.104853000 | 0.268581000  | 1 | 0.936750000  | 11.701644000 | 1.006641000  |
| 7  | 3.058055000  | 1.253096000  | 1.790423000  | 1 | 1.520476000  | 9.561990000  | -0.167060000 |
| 1  | 4.000087000  | 1.385923000  | 1.437622000  | 6 | -4.766768000 | 6.090565000  | 3.627011000  |
| 1  | 2.510784000  | 2.102184000  | 1.893650000  | 8 | -5.293284000 | 5.041239000  | 3.220351000  |
| 6  | 2.743842000  | 0.231532000  | 2.633895000  | 7 | -5.389881000 | 6.954080000  | 4.454862000  |
| 8  | 1.665376000  | 0.193054000  | 3.237530000  | 1 | -4.881812000 | 7.775216000  | 4.756419000  |
| 6  | 3.756020000  | -0.902993000 | 2.755399000  | 6 | -6.784223000 | 6.823346000  | 4.880788000  |
| 1  | 3.498739000  | -1.447953000 | 3.667247000  | 1 | -7.210911000 | 7.830957000  | 4.903780000  |
| 1  | 3.611103000  | -1.589171000 | 1.908201000  | 1 | -7.308353000 | 6.264861000  | 4.101551000  |
| 6  | 5.237788000  | -0.484070000 | 2.806903000  | 6 | -6.970217000 | 6.165366000  | 6.259165000  |
| 1  | 5.555279000  | 0.002979000  | 1.880237000  | 1 | -6.428007000 | 6.756024000  | 7.007866000  |
| 1  | 5.840047000  | -1.395717000 | 2.902587000  | 1 | -8.035604000 | 6.240208000  | 6.517539000  |
| 6  | 5.557080000  | 0.380086000  | 4.023334000  | 6 | -6.517270000 | 4.699558000  | 6.359925000  |
| 8  | 5.336643000  | -0.006232000 | 5.173671000  | 1 | -6.609905000 | 4.375358000  | 7.404159000  |
| 7  | 6.111436000  | 1.597682000  | 3.761306000  | 1 | -5.455156000 | 4.613442000  | 6.100610000  |
| 1  | 6.200605000  | 1.913105000  | 2.794972000  | 6 | -7.336895000 | 3.745857000  | 5.476009000  |
| 6  | 6.502976000  | 2.473440000  | 4.847986000  | 1 | -8.402655000 | 3.834133000  | 5.712455000  |
| 1  | 7.009338000  | 1.898416000  | 5.626166000  | 1 | -7.220592000 | 3.995870000  | 4.419958000  |
| 1  | 7.206297000  | 3.216549000  | 4.457218000  | 7 | -6.980261000 | 2.337883000  | 5.654757000  |
| 6  | 5.356274000  | 3.221102000  | 5.549933000  | 1 | -7.347797000 | 1.879000000  | 6.477236000  |
| 8  | 5.422715000  | 3.492327000  | 6.750240000  | 6 | -6.044766000 | 1.655007000  | 4.962161000  |
| 7  | 4.330086000  | 3.604572000  | 4.752123000  | 7 | -5.353342000 | 2.219823000  | 3.969460000  |
| 1  | 4.282122000  | 3.275495000  | 3.794140000  | 1 | -5.358708000 | 3.224736000  | 3.796643000  |
| 6  | 3.109709000  | 4.198293000  | 5.265777000  | 1 | -4.669199000 | 1.645285000  | 3.456747000  |
| 1  | 2.753447000  | 3.593083000  | 6.109960000  | 7 | -5.821717000 | 0.370483000  | 5.263865000  |
| 6  | 3.297967000  | 5.644808000  | 5.816768000  | 1 | -6.432991000 | -0.112457000 | 5.905804000  |
| 1  | 4.030263000  | 5.559095000  | 6.623577000  | 1 | -5.099132000 | -0.175994000 | 4.754997000  |
| 1  | 2.351668000  | 5.952221000  | 6.278018000  | 6 | -7.598907000 | 5.379354000  | -1.308403000 |
| 6  | 3.741039000  | 6.682295000  | 4.810525000  | 1 | -7.778932000 | 6.291034000  | -0.729147000 |
| 6  | 5.104764000  | 6.940455000  | 4.608075000  | 1 | -8.428993000 | 4.689143000  | -1.114311000 |
| 6  | 2.800926000  | 7.419570000  | 4.073491000  | 1 | -7.626725000 | 5.646337000  | -2.371727000 |
| 6  | 5.521400000  | 7.906957000  | 3.689514000  | 6 | -6.250359000 | 4.751803000  | -0.932511000 |
| 6  | 3.214046000  | 8.384572000  | 3.152318000  | 1 | -6.224304000 | 4.530579000  | 0.143077000  |
| 6  | 4.576166000  | 8.631584000  | 2.958626000  | 1 | -5.439690000 | 5.467034000  | -1.120094000 |
| 1  | 5.842311000  | 6.389802000  | 5.186899000  | 6 | -5.961519000 | 3.471684000  | -1.734693000 |
| 1  | 1.738538000  | 7.240761000  | 4.226595000  | 1 | -6.751796000 | 2.726501000  | -1.581410000 |
| 1  | 6.582382000  | 8.098993000  | 3.551210000  | 1 | -5.958758000 | 3.702437000  | -2.804423000 |
| 1  | 2.473509000  | 8.945297000  | 2.588286000  | 7 | -4.660558000 | 2.870492000  | -1.439515000 |
| 1  | 4.896899000  | 9.385224000  | 2.244581000  | 1 | -3.863417000 | 3.140940000  | -2.037450000 |
| 6  | 2.061210000  | 4.116083000  | 4.147232000  | 6 | -4.406265000 | 2.014537000  | -0.446204000 |
| 8  | 2.376011000  | 3.829141000  | 2.986192000  | 7 | -3.171266000 | 1.521483000  | -0.284252000 |
| 7  | 0.787800000  | 4.345606000  | 4.531098000  | 1 | -5.077774000 | 1.065919000  | 1.206017000  |
| 1  | 0.603349000  | 4.739547000  | 5.444923000  | 1 | -6.259817000 | 2.054638000  | 0.432702000  |
| 6  | -0.329282000 | 4.277019000  | 3.609826000  | 7 | -5.385020000 | 1.556880000  | 0.369070000  |
| 1  | 0.066466000  | 4.424427000  | 2.598995000  | 1 | -2.992997000 | 1.051038000  | 0.603351000  |
| 6  | -0.968242000 | 2.863444000  | 3.638105000  | 1 | -2.383614000 | 2.004313000  | -0.742922000 |
| 1  | -0.144212000 | 2.153470000  | 3.481082000  | 6 | -8.716227000 | 6.935047000  | -6.256543000 |
| 8  | -1.863435000 | 2.808855000  | 2.525232000  | 1 | -8.969669000 | 5.990341000  | -6.751511000 |
| 1  | -2.365996000 | 1.961688000  | 2.557119000  | 1 | -9.522339000 | 7.651135000  | -6.457783000 |
| 6  | -1.662424000 | 2.538264000  | 4.962595000  | 1 | -8.690049000 | 6.748503000  | -5.176468000 |
| 1  | -0.956298000 | 2.608067000  | 5.797178000  | 6 | -7.361085000 | 7.467452000  | -7.534770000 |
| 1  | -2.054326000 | 1.515910000  | 4.948609000  | 6 | -6.233542000 | 6.494945000  | -6.484732000 |
| 1  | -2.498966000 | 3.220737000  | 5.148637000  | 6 | -5.555888000 | 6.495678000  | -5.258064000 |
| 6  | -1.286529000 | 5.451251000  | 3.899848000  | 6 | -5.874430000 | 5.518607000  | -7.425641000 |
| 8  | -0.963869000 | 6.366786000  | 4.661972000  | 6 | -4.565178000 | 5.556863000  | -4.968137000 |
| 7  | -2.457016000 | 5.396279000  | 3.222409000  | 6 | -4.889274000 | 4.570830000  | -7.154962000 |
| 1  | -2.631623000 | 4.550215000  | 2.679149000  | 6 | -4.231595000 | 4.578002000  | -5.917325000 |
| 6  | -3.378073000 | 6.511919000  | 3.132903000  | 8 | -3.279839000 | 3.633898000  | -5.688525000 |
| 1  | -2.966978000 | 7.308734000  | 3.756795000  | 1 | -2.952259000 | 3.701443000  | -4.754457000 |





|   |             |             |             |   |             |             |             |
|---|-------------|-------------|-------------|---|-------------|-------------|-------------|
| 6 | 3.61000000  | 8.49797200  | 3.19076700  | 1 | -5.85086800 | 5.37559000  | -0.08949900 |
| 6 | 4.98030400  | 8.67373100  | 2.97830500  | 1 | -5.00680800 | 6.14323400  | -1.42650800 |
| 1 | 6.16286200  | 6.66776300  | 5.46233800  | 6 | -5.69426200 | 4.15257000  | -1.87424500 |
| 1 | 2.09291600  | 7.54048300  | 4.38198900  | 1 | -6.54842800 | 3.49663500  | -1.66471100 |
| 1 | 6.96495600  | 8.14869200  | 3.64590300  | 1 | -5.67472400 | 4.29097300  | -2.95956000 |
| 1 | 2.89125400  | 9.01445600  | 2.55982200  | 7 | -4.45394200 | 3.46710300  | -1.51900600 |
| 1 | 5.32973200  | 9.32914500  | 2.18511900  | 1 | -3.62643100 | 3.61215800  | -2.12514300 |
| 6 | 2.38532900  | 4.41288700  | 4.61223400  | 6 | -4.28146500 | 2.69617700  | -0.44076900 |
| 8 | 2.77306200  | 4.02297300  | 3.50424400  | 7 | -3.09760600 | 2.12733600  | -0.20119500 |
| 7 | 1.08962300  | 4.68309900  | 4.87639600  | 1 | -5.05804900 | 1.94437300  | 1.26614400  |
| 1 | 0.83733700  | 5.17396100  | 5.72584100  | 1 | -6.12713500 | 2.98981100  | 0.41339400  |
| 6 | 0.07216000  | 4.60709400  | 3.84522700  | 7 | -5.30865800 | 2.40108600  | 0.39361700  |
| 1 | 0.57307200  | 4.72119600  | 2.87757700  | 1 | -2.97424300 | 1.72601200  | 0.73109200  |
| 6 | -0.60141900 | 3.20832100  | 3.82731600  | 1 | -2.26244700 | 2.44283100  | -0.72137400 |
| 1 | 0.21491700  | 2.47437300  | 3.77248800  | 6 | -7.84738500 | -1.31267200 | -3.50399200 |
| 8 | -1.36479900 | 3.15539300  | 2.61883100  | 1 | -7.55077200 | -2.25352000 | -3.98186400 |
| 1 | -2.03988500 | 2.43968300  | 2.67587100  | 1 | -8.88814300 | -1.41270300 | -3.17326500 |
| 6 | -1.43990600 | 2.92157400  | 5.07250500  | 1 | -7.21981600 | -1.17766200 | -2.61524200 |
| 1 | -0.82346200 | 2.99973800  | 5.97445800  | 6 | -7.68773700 | -0.12772700 | -4.47434700 |
| 1 | -1.84439300 | 1.90454700  | 5.03611400  | 6 | -6.26592700 | 0.05688100  | -4.96530500 |
| 1 | -2.27974900 | 3.61998600  | 5.15674300  | 6 | -5.35213200 | 0.85563700  | -4.26422300 |
| 6 | -0.88333900 | 5.80583800  | 4.00634000  | 6 | -5.80690400 | -0.58874000 | -6.12361200 |
| 8 | -0.64534500 | 6.71547400  | 4.80720500  | 6 | -4.03061900 | 1.00874100  | -4.68846600 |
| 7 | -1.94159500 | 5.78457800  | 3.16525700  | 6 | -4.49051000 | -0.45338700 | -6.56199500 |
| 1 | -2.05960100 | 4.93414100  | 2.61326600  | 6 | -3.59378900 | 0.34512900  | -5.84088600 |
| 6 | -2.81448000 | 6.92261300  | 2.94605300  | 8 | -2.31635200 | 0.44704100  | -6.31743400 |
| 1 | -2.34393200 | 7.77664500  | 3.43915500  | 1 | -1.76690100 | 0.95583500  | -5.69489600 |
| 6 | -2.96318400 | 7.20342200  | 1.42237100  | 1 | -8.02515600 | 0.78977700  | -3.97488300 |
| 1 | -3.66006000 | 8.04476900  | 1.30711200  | 1 | -8.35522800 | -0.27772800 | -5.33275600 |
| 1 | -3.45060000 | 6.33136500  | 0.97113100  | 1 | -5.67621900 | 1.37554500  | -3.36514900 |
| 6 | -1.66398300 | 7.49070900  | 0.73014100  | 1 | -6.49320900 | -1.20852600 | -6.69726900 |
| 6 | -0.93056800 | 6.61446900  | -0.04392100 | 1 | -3.34968500 | 1.65674100  | -4.14045300 |
| 7 | 0.22313800  | 7.21592400  | -0.49099400 | 1 | -4.14396900 | -0.95607400 | -7.46030800 |
| 1 | -1.14451000 | 5.58632000  | -0.30894900 | 8 | 2.34487200  | 6.07066600  | -2.04420700 |
| 1 | 0.93694400  | 6.78799100  | -1.09584300 | 8 | 3.88720800  | 7.54989300  | -1.36759900 |
| 6 | -0.90880500 | 8.71875600  | 0.76840100  | 6 | 3.41786000  | 6.40237500  | -1.39609200 |
| 6 | 0.26935000  | 8.50395000  | -0.00609400 | 6 | 4.08992800  | 5.28083500  | -0.57844600 |
| 6 | -1.10054900 | 9.97658500  | 1.37283100  | 1 | 3.31215100  | 4.84128000  | 0.06205000  |
| 6 | 1.24792300  | 9.49299900  | -0.17709500 | 1 | 4.40136500  | 4.47556000  | -1.25886400 |
| 6 | -0.13614500 | 10.96382100 | 1.20123800  | 6 | 5.25627200  | 5.77275900  | 0.28515800  |
| 6 | 1.02862500  | 10.72243500 | 0.43783800  | 1 | 4.95327400  | 6.71002800  | 0.76049100  |
| 1 | -1.98957700 | 10.17713200 | 1.96690300  | 1 | 6.10881500  | 6.04746700  | -0.35102400 |
| 1 | -0.27550500 | 11.93742600 | 1.66450600  | 6 | 5.67301200  | 4.80974000  | 1.40828100  |
| 1 | 1.76605700  | 11.51347300 | 0.32753500  | 1 | 4.79867200  | 4.54387100  | 2.01046700  |
| 1 | 2.14474400  | 9.28455700  | -0.75502000 | 1 | 6.35866500  | 5.33400800  | 2.09009000  |
| 6 | -4.20145900 | 6.65459300  | 3.54777200  | 6 | 6.37120800  | 3.50338400  | 1.05614200  |
| 8 | -4.85363600 | 5.65032800  | 3.21831600  | 8 | 6.24543400  | 2.49836300  | 1.78575000  |
| 7 | -4.66983600 | 7.58751900  | 4.40162100  | 7 | 7.18390300  | 3.50304400  | -0.01997100 |
| 1 | -4.06508400 | 8.36148900  | 4.64391100  | 1 | 7.25411800  | 4.35483500  | -0.56079100 |
| 6 | -6.01147300 | 7.56106500  | 4.98295000  | 6 | 8.05795200  | 2.39337100  | -0.38758900 |
| 1 | -6.38212900 | 8.59089300  | 4.99890700  | 1 | 7.96381600  | 1.64859600  | 0.40379800  |
| 1 | -6.64596700 | 6.99441600  | 4.29760100  | 1 | 9.09419800  | 2.75303600  | -0.38950300 |
| 6 | -6.06614100 | 6.98193600  | 6.40726300  | 6 | 7.73606800  | 1.77956000  | -1.76114600 |
| 1 | -5.40026800 | 7.57056700  | 7.05041100  | 1 | 8.52835800  | 1.04804700  | -1.97291900 |
| 1 | -7.08378500 | 7.14047500  | 6.79039000  | 1 | 7.82218500  | 2.55545500  | -2.53202800 |
| 6 | -5.69245600 | 5.49631400  | 6.53537500  | 6 | 6.37957700  | 1.11042600  | -1.86031400 |
| 1 | -5.62414700 | 5.24125800  | 7.60031500  | 6 | 6.05520000  | 0.01304800  | -1.04715800 |
| 1 | -4.69713500 | 5.32010800  | 6.11002100  | 6 | 5.43029100  | 1.54834000  | -2.79269500 |
| 6 | -6.70987500 | 6.55287700  | 5.87370900  | 6 | 4.81836400  | -0.62357500 | -1.16015900 |
| 1 | -7.70414600 | 4.70970600  | 6.30444700  | 6 | 4.19588000  | 0.90354100  | -2.91900400 |
| 1 | -6.79335800 | 4.75076800  | 4.80263500  | 6 | 3.88143900  | -0.18311400 | -2.10044600 |
| 7 | -6.39223400 | 3.13462600  | 6.05102100  | 1 | 6.78153100  | -0.35544500 | -0.32588600 |
| 1 | -6.61651200 | 2.72700300  | 6.94868600  | 1 | 5.66895900  | 2.38699400  | -3.44337800 |
| 6 | -5.58849700 | 2.40665000  | 5.24735300  | 1 | 4.58883100  | -1.47772700 | -0.52876800 |
| 7 | -5.06606200 | 2.91945600  | 4.13388200  | 1 | 3.49651400  | 1.22346200  | -3.68640700 |
| 1 | -5.05868600 | 3.92025300  | 3.93741200  | 1 | 2.93001400  | -0.69832200 | -2.20653900 |
| 1 | -4.45148300 | 2.31779800  | 3.56023900  | 7 | 1.38180900  | 3.73285000  | -2.68696500 |
| 7 | -5.32663700 | 1.12970900  | 5.56258500  | 1 | 1.01801700  | 3.26179300  | -1.83831100 |
| 1 | -5.86270200 | 0.66933000  | 6.28389200  | 1 | 2.02577100  | 3.09547600  | -3.16110500 |
| 1 | -4.74098700 | 0.54291900  | 4.93928100  | 1 | 1.89768500  | 4.64791800  | -2.38209100 |
| 6 | -7.16891800 | 6.20813000  | -1.59666600 | 6 | 0.15932500  | 4.03758900  | -3.50671900 |
| 1 | -7.27166600 | 7.17689900  | -1.09654600 | 1 | 0.11036000  | 5.12598800  | -3.59931100 |
| 1 | -8.04637600 | 5.60284700  | -1.33801800 | 6 | -1.08746300 | 3.59599700  | -2.68867800 |
| 1 | -7.19317600 | 6.38602700  | -2.67848100 | 8 | -2.20356800 | 3.80714400  | -3.21805000 |
| 6 | -5.86953700 | 5.51237900  | -1.17926000 | 8 | -0.84598100 | 3.08587500  | -1.55441200 |





|    |              |              |              |   |              |              |              |
|----|--------------|--------------|--------------|---|--------------|--------------|--------------|
| 1  | -3.072784000 | -2.562179000 | -0.089247000 | 6 | -0.882008000 | 5.799081000  | 4.006373000  |
| 1  | 3.026885000  | -3.733840000 | 1.382266000  | 8 | -0.642045000 | 6.708923000  | 4.806365000  |
| 1  | 4.164844000  | -5.412034000 | -4.666727000 | 7 | -1.942225000 | 5.777996000  | 3.167723000  |
| 1  | -1.932141000 | -4.225927000 | -6.132709000 | 1 | -2.060955000 | 4.928078000  | 2.615106000  |
| 1  | 0.965681000  | -2.830684000 | 2.728539000  | 6 | -2.812761000 | 6.917778000  | 2.947781000  |
| 1  | 5.151487000  | -4.572746000 | 0.082253000  | 1 | -2.341328000 | 7.770631000  | 3.442057000  |
| 1  | 5.638807000  | -5.278994000 | -2.493461000 | 6 | -2.957944000 | 7.199661000  | 1.423931000  |
| 1  | 2.739534000  | -5.583788000 | -6.866443000 | 1 | -3.653631000 | 8.041735000  | 1.307355000  |
| 1  | 0.142815000  | -5.092181000 | -7.486370000 | 1 | -3.445031000 | 6.328283000  | 0.971050000  |
| 1  | -4.054727000 | -3.370880000 | -4.831876000 | 6 | -1.656509000 | 7.486229000  | 0.735632000  |
| 1  | -4.538549000 | -2.679003000 | -2.254039000 | 6 | -0.918165000 | 6.608155000  | -0.031663000 |
| 6  | -1.899842000 | -2.111566000 | 2.380961000  | 7 | 0.237043000  | 7.209438000  | -0.475087000 |
| 6  | -2.070677000 | -0.608661000 | 2.101168000  | 1 | -1.129548000 | 5.578826000  | -0.294120000 |
| 6  | -3.148662000 | 0.104734000  | 2.915022000  | 1 | 0.954936000  | 6.779280000  | -1.073547000 |
| 8  | -3.418554000 | 1.313008000  | 2.523415000  | 6 | -0.903012000 | 8.715278000  | 0.773355000  |
| 8  | -3.684402000 | -0.450362000 | 3.892665000  | 6 | 0.279297000  | 8.499268000  | 0.005563000  |
| 1  | -1.621113000 | -2.255725000 | 3.429643000  | 6 | -1.099411000 | 9.974939000  | 1.372442000  |
| 1  | -2.863726000 | -2.617225000 | 2.244428000  | 6 | 1.257525000  | 9.488917000  | -0.163785000 |
| 1  | -1.120680000 | -0.089678000 | 2.291641000  | 6 | -0.135412000 | 10.962808000 | 1.202313000  |
| 1  | -2.285181000 | -0.445629000 | 1.038615000  | 6 | 1.033528000  | 10.720224000 | 0.445699000  |
| 16 | -0.010568000 | -6.275793000 | -1.912998000 | 1 | -1.991677000 | 10.176356000 | 1.961346000  |
| 1  | -0.701243000 | -6.087161000 | -0.765965000 | 1 | -0.278358000 | 11.937843000 | 1.661469000  |
| 8  | 0.947350000  | -2.315226000 | -2.760834000 | 1 | 1.770549000  | 11.511795000 | 0.336427000  |
| 7  | 3.422498000  | 1.424836000  | 2.392634000  | 1 | 2.157594000  | 9.279351000  | -0.736182000 |
| 1  | 4.394140000  | 1.605602000  | 2.157627000  | 6 | -4.201015000 | 6.651973000  | 3.547418000  |
| 1  | 2.835288000  | 2.251040000  | 2.442472000  | 8 | -4.854799000 | 5.649316000  | 3.216227000  |
| 6  | 3.040848000  | 0.365983000  | 3.151650000  | 7 | -4.668465000 | 7.584905000  | 4.401822000  |
| 8  | 1.901105000  | 0.263918000  | 3.617791000  | 1 | -4.062469000 | 8.357472000  | 4.645489000  |
| 6  | 4.074500000  | -0.741933000 | 3.362926000  | 6 | -6.010424000 | 7.560002000  | 4.982495000  |
| 1  | 3.745540000  | -1.308383000 | 4.237182000  | 1 | -6.380414000 | 8.590095000  | 4.997481000  |
| 1  | 4.024108000  | -1.417068000 | 2.498709000  | 1 | -6.644894000 | 6.993236000  | 4.297242000  |
| 6  | 5.531651000  | -0.285036000 | 3.558205000  | 6 | -6.066141000 | 6.981936000  | 6.407263000  |
| 1  | 5.917227000  | 0.231187000  | 2.674766000  | 1 | -5.401043000 | 7.571349000  | 7.050511000  |
| 1  | 6.151029000  | -1.180434000 | 3.692745000  | 1 | -7.084165000 | 7.140395000  | 6.789401000  |
| 6  | 5.714841000  | 0.557416000  | 4.819657000  | 6 | -5.691907000 | 5.496692000  | 6.536501000  |
| 8  | 5.355435000  | 0.154694000  | 5.927555000  | 1 | -5.623370000 | 5.242330000  | 7.601593000  |
| 7  | 6.327622000  | 1.763526000  | 4.645335000  | 1 | -4.696584000 | 5.320495000  | 6.111122000  |
| 1  | 6.515528000  | 2.092624000  | 3.699867000  | 6 | -6.709179000 | 4.552722000  | 5.875572000  |
| 6  | 6.641520000  | 2.608181000  | 5.782112000  | 1 | -7.703262000 | 4.709154000  | 6.306932000  |
| 1  | 6.977113000  | 1.988193000  | 6.615685000  | 1 | -6.793483000 | 4.750481000  | 4.804533000  |
| 1  | 7.462283000  | 3.277314000  | 5.501837000  | 7 | -6.390532000 | 3.134844000  | 6.052709000  |
| 6  | 5.490946000  | 3.472594000  | 6.327688000  | 1 | -6.612002000 | 2.727660000  | 6.951276000  |
| 8  | 5.452938000  | 3.790541000  | 7.517594000  | 6 | -5.588497000 | 2.406650000  | 5.247353000  |
| 7  | 4.588083000  | 3.897195000  | 5.412076000  | 7 | -5.067715000 | 2.919544000  | 4.133419000  |
| 1  | 4.610578000  | 3.525085000  | 4.468693000  | 1 | -5.060279000 | 3.920375000  | 3.937198000  |
| 6  | 3.367044000  | 4.590936000  | 5.779580000  | 1 | -4.456670000 | 2.317288000  | 3.556411000  |
| 1  | 2.943830000  | 4.103394000  | 6.666954000  | 7 | -5.327066000 | 1.129629000  | 5.562843000  |
| 6  | 3.585401000  | 6.086491000  | 6.161976000  | 1 | -5.867397000 | 0.669056000  | 6.280907000  |
| 1  | 4.300181000  | 6.077911000  | 6.989950000  | 1 | -4.747617000 | 0.541276000  | 4.935013000  |
| 1  | 2.639797000  | 6.469552000  | 6.564641000  | 6 | -7.168918000 | 6.208130000  | -1.596666000 |
| 6  | 4.072706000  | 6.988427000  | 5.050137000  | 1 | -7.283769000 | 7.172445000  | -1.090604000 |
| 6  | 5.445571000  | 7.180401000  | 4.835641000  | 1 | -8.038840000 | 5.590385000  | -1.342079000 |
| 6  | 3.163406000  | 7.664988000  | 4.221406000  | 1 | -7.195138000 | 6.392464000  | -2.677359000 |
| 6  | 5.900641000  | 8.021574000  | 3.817500000  | 6 | -5.861141000 | 5.525770000  | -1.182968000 |
| 6  | 3.614676000  | 8.504640000  | 3.200193000  | 1 | -5.842226000 | 5.381795000  | -0.094157000 |
| 6  | 4.985525000  | 8.685654000  | 2.995728000  | 1 | -5.005960000 | 6.169049000  | -1.424247000 |
| 1  | 6.161381000  | 6.676473000  | 5.480343000  | 6 | -5.668817000 | 4.173097000  | -1.887258000 |
| 1  | 2.094415000  | 7.538897000  | 4.380763000  | 1 | -6.521008000 | 3.510202000  | -1.691820000 |
| 1  | 6.968321000  | 8.165286000  | 3.672415000  | 1 | -5.638577000 | 4.320225000  | -2.971103000 |
| 1  | 2.897621000  | 9.020402000  | 2.566752000  | 7 | -4.428519000 | 3.491536000  | -1.523689000 |
| 1  | 5.337011000  | 9.344441000  | 2.206248000  | 1 | -3.597416000 | 3.635782000  | -2.124627000 |
| 6  | 2.388140000  | 4.412431000  | 4.610089000  | 6 | -4.266149000 | 2.713599000  | -0.448608000 |
| 8  | 2.779029000  | 4.028175000  | 3.501211000  | 7 | -3.086622000 | 2.139262000  | -0.203194000 |
| 7  | 1.091014000  | 4.675442000  | 4.874627000  | 1 | -5.057594000 | 1.955850000  | 1.248440000  |
| 1  | 0.837140000  | 5.161431000  | 5.726365000  | 1 | -6.114781000 | 3.012986000  | 0.396439000  |
| 6  | 0.073060000  | 4.599943000  | 3.843913000  | 7 | -5.300940000 | 2.417795000  | 0.376532000  |
| 1  | 0.573653000  | 4.714764000  | 2.876191000  | 1 | -2.971113000 | 1.732962000  | 0.727871000  |
| 6  | -0.600747000 | 3.201166000  | 3.825477000  | 1 | -2.246619000 | 2.449749000  | -0.719044000 |
| 1  | 0.215385000  | 2.467103000  | 3.769032000  | 6 | -7.847385000 | -1.312672000 | -3.503992000 |
| 8  | -1.365619000 | 3.149321000  | 2.617786000  | 1 | -7.546953000 | -2.241137000 | -4.003227000 |
| 1  | -2.042830000 | 2.435821000  | 2.675939000  | 1 | -8.883773000 | -1.429067000 | -3.164956000 |
| 6  | -1.438204000 | 2.913388000  | 5.071091000  | 1 | -7.212137000 | -1.189225000 | -2.619020000 |
| 1  | -0.820884000 | 2.989413000  | 5.972625000  | 6 | -7.708205000 | -0.107656000 | -4.452217000 |
| 1  | -1.843727000 | 1.896800000  | 5.033395000  | 6 | -6.292622000 | 0.098691000  | -4.951975000 |
| 1  | -2.277299000 | 3.612468000  | 5.157219000  | 6 | -5.379002000 | 0.890270000  | -4.242597000 |

|   |              |              |              |
|---|--------------|--------------|--------------|
| 6 | -5.838780000 | -0.520618000 | -6.126470000 |
| 6 | -4.062633000 | 1.062350000  | -4.675175000 |
| 6 | -4.527465000 | -0.366130000 | -6.573513000 |
| 6 | -3.631173000 | 0.425708000  | -5.844692000 |
| 8 | -2.359333000 | 0.549022000  | -6.330629000 |
| 1 | -1.807206000 | 1.043416000  | -5.699086000 |
| 1 | -8.049119000 | 0.796832000  | -3.931840000 |
| 1 | -8.382254000 | -0.247130000 | -5.307254000 |
| 1 | -5.699182000 | 1.388745000  | -3.330129000 |
| 1 | -6.525154000 | -1.134814000 | -6.706024000 |
| 1 | -3.380693000 | 1.703761000  | -4.120699000 |
| 1 | -4.184652000 | -0.848576000 | -7.484252000 |
| 8 | 2.367995000  | 6.053186000  | -2.008095000 |
| 8 | 3.897810000  | 7.546336000  | -1.332082000 |
| 6 | 3.437493000  | 6.395110000  | -1.359791000 |
| 6 | 4.117326000  | 5.279165000  | -0.541816000 |
| 1 | 3.342528000  | 4.834170000  | 0.098516000  |
| 1 | 4.434170000  | 4.476426000  | -1.222709000 |
| 6 | 5.280323000  | 5.777804000  | 0.321973000  |
| 1 | 4.971729000  | 6.711738000  | 0.800199000  |
| 1 | 6.130969000  | 6.059193000  | -0.313882000 |
| 6 | 5.702749000  | 4.812929000  | 1.441187000  |
| 1 | 4.831443000  | 4.548655000  | 2.048355000  |
| 1 | 6.395480000  | 5.333349000  | 2.118680000  |
| 6 | 6.391167000  | 3.504857000  | 1.077327000  |
| 8 | 6.261056000  | 2.493969000  | 1.798085000  |
| 7 | 7.198321000  | 3.508092000  | -0.002801000 |
| 1 | 7.273297000  | 4.364515000  | -0.535674000 |
| 6 | 8.057952000  | 2.393371000  | -0.387589000 |
| 1 | 7.946617000  | 1.633779000  | 0.387075000  |
| 1 | 9.100070000  | 2.735640000  | -0.374620000 |
| 6 | 7.736473000  | 1.816266000  | -1.776798000 |
| 1 | 8.517823000  | 1.075929000  | -1.998934000 |
| 1 | 7.843388000  | 2.607376000  | -2.529484000 |
| 6 | 6.369497000  | 1.173098000  | -1.905570000 |
| 6 | 6.000504000  | 0.089859000  | -1.092689000 |
| 6 | 5.456517000  | 1.618378000  | -2.870827000 |
| 6 | 4.756595000  | -0.526422000 | -1.237873000 |
| 6 | 4.216425000  | 0.992034000  | -3.030632000 |
| 6 | 3.857763000  | -0.080685000 | -2.211608000 |
| 1 | 6.696700000  | -0.284994000 | -0.345593000 |
| 1 | 5.729251000  | 2.447235000  | -3.520703000 |
| 1 | 4.492867000  | -1.369671000 | -0.605104000 |
| 1 | 3.544715000  | 1.317233000  | -3.821407000 |
| 1 | 2.903517000  | -0.583038000 | -2.344472000 |
| 7 | 1.420629000  | 3.707605000  | -2.645980000 |
| 1 | 1.042372000  | 3.237600000  | -1.803056000 |
| 1 | 2.065919000  | 3.066822000  | -3.114025000 |
| 1 | 1.936837000  | 4.619896000  | -2.335791000 |
| 6 | 0.210466000  | 4.031164000  | -3.477207000 |
| 1 | 0.175436000  | 5.120963000  | -3.559901000 |
| 6 | -1.049888000 | 3.597450000  | -2.675113000 |
| 8 | -2.159114000 | 3.821954000  | -3.213014000 |
| 8 | -0.823692000 | 3.080544000  | -1.540541000 |
| 6 | 0.268680000  | 3.451371000  | -4.897151000 |
| 1 | -0.673568000 | 3.749278000  | -5.373113000 |
| 1 | 1.062594000  | 3.968191000  | -5.451927000 |
| 6 | 0.479863000  | 1.961953000  | -5.012582000 |
| 6 | 0.342122000  | 0.973153000  | -4.050820000 |
| 1 | 0.056958000  | 1.048260000  | -3.010734000 |
| 7 | 0.634149000  | -0.255637000 | -4.596852000 |
| 1 | 0.695978000  | -1.124441000 | -4.035057000 |
| 6 | 0.962029000  | -0.095325000 | -5.911209000 |
| 6 | 0.878297000  | 1.279778000  | -6.220537000 |
| 6 | 1.095689000  | 1.715465000  | -7.548707000 |
| 6 | 1.350662000  | 0.750999000  | -8.543571000 |
| 6 | 1.339518000  | -1.098506000 | -6.881919000 |
| 6 | 1.417970000  | -0.600675000 | -8.252517000 |
| 1 | 1.033269000  | 2.767696000  | -7.809481000 |
| 1 | 1.469130000  | 1.075047000  | -9.573962000 |
| 1 | 0.926840000  | -2.099881000 | -6.753993000 |
| 1 | 1.597119000  | -1.323963000 | -9.040311000 |
| 7 | 3.051088000  | -1.657888000 | -6.492330000 |
| 8 | 3.539542000  | -1.319289000 | -5.427832000 |
| 8 | 3.581645000  | -2.363239000 | -7.337558000 |

<sup>4</sup>Int4<sub>B,C7-exo</sub>

|    |              |              |              |
|----|--------------|--------------|--------------|
| 26 | 2.605252000  | -4.900043000 | 0.212696000  |
| 7  | 1.201694000  | -4.398586000 | 1.582842000  |
| 7  | 3.813653000  | -5.584272000 | 1.682188000  |
| 7  | 3.924816000  | -5.570853000 | -1.171057000 |
| 7  | 1.327827000  | -4.364941000 | -1.269888000 |
| 6  | -0.019734000 | -3.820342000 | 1.349261000  |
| 6  | -0.691169000 | -3.520535000 | 2.609450000  |
| 6  | 0.165071000  | -3.933191000 | 3.587107000  |
| 6  | 1.338403000  | -4.473833000 | 2.942336000  |
| 6  | 3.584143000  | -5.499361000 | 3.028473000  |
| 6  | 4.714407000  | -6.030891000 | 3.759876000  |
| 6  | 5.625639000  | -6.434427000 | 2.832975000  |
| 6  | 5.053672000  | -6.147348000 | 1.534795000  |
| 6  | 5.148773000  | -6.137117000 | -0.931931000 |
| 6  | 5.824623000  | -6.407185000 | -2.181385000 |
| 6  | 4.993390000  | -5.987156000 | -3.174915000 |
| 6  | 3.809287000  | -5.461888000 | -2.532402000 |
| 6  | 1.573935000  | -4.414245000 | -2.616798000 |
| 6  | 0.452829000  | -3.863515000 | -3.345151000 |
| 6  | -0.470383000 | -3.482123000 | -2.412681000 |
| 6  | 0.091264000  | -3.799964000 | -1.118931000 |
| 6  | -0.548608000 | -3.554351000 | 0.093505000  |
| 6  | 2.437034000  | -4.985951000 | 3.622868000  |
| 6  | 5.680643000  | -6.413447000 | 0.323752000  |
| 6  | 2.722687000  | -4.924455000 | -3.212973000 |
| 1  | -1.537493000 | -3.110385000 | 0.045408000  |
| 1  | 2.396965000  | -4.981463000 | 4.707832000  |
| 1  | 6.666772000  | -6.866487000 | 0.359659000  |
| 1  | 2.771948000  | -4.907152000 | -4.297689000 |
| 1  | 0.022757000  | -3.877615000 | 4.659870000  |
| 1  | 4.780650000  | -6.079367000 | 4.839610000  |
| 1  | 6.597866000  | -6.884260000 | 2.991558000  |
| 1  | 6.806276000  | -6.856546000 | -2.266063000 |
| 1  | 5.149530000  | -6.019640000 | -4.246038000 |
| 1  | 0.386384000  | -3.804201000 | -4.424710000 |
| 1  | -1.449052000 | -3.045445000 | -2.570703000 |
| 6  | -2.032453000 | -2.867608000 | 2.788582000  |
| 6  | -2.039163000 | -1.353698000 | 2.493740000  |
| 6  | -3.291305000 | -0.635275000 | 3.004795000  |
| 8  | -3.542515000 | 0.530257000  | 2.495606000  |
| 8  | -3.985168000 | -1.167252000 | 3.894193000  |
| 1  | -2.359308000 | -3.011473000 | 3.822313000  |
| 1  | -2.786621000 | -3.356755000 | 2.157449000  |
| 1  | -1.171276000 | -0.878703000 | 2.973463000  |
| 1  | -1.928410000 | -1.154310000 | 1.422350000  |
| 16 | 1.538379000  | -7.233557000 | 0.195502000  |
| 1  | 2.673021000  | -7.939677000 | -0.011882000 |
| 8  | 3.287226000  | -3.405741000 | 0.257867000  |
| 7  | 2.890840000  | 1.222939000  | 1.770966000  |
| 1  | 3.823172000  | 1.335868000  | 1.387043000  |
| 1  | 2.368842000  | 2.084327000  | 1.899032000  |
| 6  | 2.578541000  | 0.200141000  | 2.612634000  |
| 8  | 1.518823000  | 0.179962000  | 3.249565000  |
| 6  | 3.573963000  | -0.953672000 | 2.699431000  |
| 1  | 3.323502000  | -1.509230000 | 3.606266000  |
| 1  | 3.407881000  | -1.628568000 | 1.848532000  |
| 6  | 5.060839000  | -0.550355000 | 2.733865000  |
| 1  | 5.369554000  | -0.056763000 | 1.807842000  |
| 1  | 5.654748000  | -1.469249000 | 2.810301000  |
| 6  | 5.408165000  | 0.295367000  | 3.956650000  |
| 8  | 5.193508000  | -0.099139000 | 5.104886000  |
| 7  | 5.986857000  | 1.504683000  | 3.703121000  |
| 1  | 6.070492000  | 1.829032000  | 2.739880000  |
| 6  | 6.429723000  | 2.350081000  | 4.795095000  |
| 1  | 6.914841000  | 1.741295000  | 5.560968000  |
| 1  | 7.165391000  | 3.062053000  | 4.405713000  |
| 6  | 5.329395000  | 3.147036000  | 5.518762000  |
| 8  | 5.426571000  | 3.414649000  | 6.717641000  |
| 7  | 4.308679000  | 3.573744000  | 4.736821000  |
| 1  | 4.235252000  | 3.242446000  | 3.781017000  |
| 6  | 3.109728000  | 4.198279000  | 5.265727000  |
| 1  | 2.764256000  | 3.618229000  | 6.131317000  |
| 6  | 3.327288000  | 5.655668000  | 5.772875000  |

|   |              |              |              |   |              |              |              |
|---|--------------|--------------|--------------|---|--------------|--------------|--------------|
| 1 | 4.085684000  | 5.585024000  | 6.557352000  | 1 | -5.151588000 | -0.201909000 | 4.728039000  |
| 1 | 2.398515000  | 5.981101000  | 6.257052000  | 6 | -7.598913000 | 5.379350000  | -1.308407000 |
| 6 | 3.741691000  | 6.664244000  | 4.725567000  | 1 | -7.740530000 | 6.306983000  | -0.744012000 |
| 6 | 5.098710000  | 6.912312000  | 4.472165000  | 1 | -8.456492000 | 4.727251000  | -1.102002000 |
| 6 | 2.780252000  | 7.384697000  | 3.999249000  | 1 | -7.617606000 | 5.629626000  | -2.375965000 |
| 6 | 5.487991000  | 7.852875000  | 3.515523000  | 6 | -6.276846000 | 4.703694000  | -0.923570000 |
| 6 | 3.165755000  | 8.323094000  | 3.039303000  | 1 | -6.255823000 | 4.499066000  | 0.155010000  |
| 6 | 4.521540000  | 8.560594000  | 2.795663000  | 1 | -5.438849000 | 5.382150000  | -1.127412000 |
| 1 | 5.853474000  | 6.373390000  | 5.039682000  | 6 | -6.042351000 | 3.398525000  | -1.702370000 |
| 1 | 1.722837000  | 7.213061000  | 4.190400000  | 1 | -6.856859000 | 2.685259000  | -1.525468000 |
| 1 | 6.544466000  | 8.037553000  | 3.338201000  | 1 | -6.047244000 | 3.605617000  | -2.776959000 |
| 1 | 2.409046000  | 8.871692000  | 2.484797000  | 7 | -4.757212000 | 2.763730000  | -1.411979000 |
| 1 | 4.820979000  | 9.293847000  | 2.051717000  | 1 | -3.954379000 | 3.007203000  | -2.011643000 |
| 6 | 2.042467000  | 4.101561000  | 4.162947000  | 6 | -4.498887000 | 1.937833000  | -0.393525000 |
| 8 | 2.348703000  | 3.825721000  | 2.996373000  | 7 | -3.246185000 | 1.498226000  | -0.196614000 |
| 7 | 0.768984000  | 4.307260000  | 4.559724000  | 1 | -5.178525000 | 0.989184000  | 1.261640000  |
| 1 | 0.586410000  | 4.681392000  | 5.482103000  | 1 | -6.409384000 | 1.829925000  | 0.369642000  |
| 6 | -0.353296000 | 4.227864000  | 3.643876000  | 7 | -5.471128000 | 1.465503000  | 0.412117000  |
| 1 | 0.044044000  | 4.351629000  | 2.630790000  | 1 | -3.084644000 | 1.014825000  | 0.689423000  |
| 6 | -1.000596000 | 2.818072000  | 3.699054000  | 1 | -2.474514000 | 2.068706000  | -0.569510000 |
| 1 | -0.181792000 | 2.100543000  | 3.551582000  | 6 | -8.716207000 | 6.935032000  | -6.256527000 |
| 8 | -1.900180000 | 2.747741000  | 2.589430000  | 1 | -8.996109000 | 6.030981000  | -6.809829000 |
| 1 | -2.385501000 | 1.891158000  | 2.620862000  | 1 | -9.465192000 | 7.707860000  | -6.466877000 |
| 6 | -1.696551000 | 2.518993000  | 5.028254000  | 1 | -8.762591000 | 6.698776000  | -5.186854000 |
| 1 | -0.990019000 | 2.590724000  | 5.862432000  | 6 | -7.305807000 | 7.409056000  | -6.653896000 |
| 1 | -2.098735000 | 1.500391000  | 5.024860000  | 6 | -6.232330000 | 6.373683000  | -6.386061000 |
| 1 | -2.526193000 | 3.212231000  | 5.205908000  | 6 | -5.536373000 | 6.341886000  | -5.170027000 |
| 6 | -1.301895000 | 5.415499000  | 3.907710000  | 6 | -5.922213000 | 5.386153000  | -7.334147000 |
| 8 | -0.978904000 | 6.339150000  | 4.659560000  | 6 | -4.575135000 | 5.365405000  | -4.898181000 |
| 7 | -2.464805000 | 5.364598000  | 3.215724000  | 6 | -4.968533000 | 4.402116000  | -7.081335000 |
| 1 | -2.649074000 | 4.509817000  | 2.689984000  | 6 | -4.287990000 | 4.378912000  | -5.854776000 |
| 6 | -3.382776000 | 6.482705000  | 3.120055000  | 8 | -3.371369000 | 3.396088000  | -5.649130000 |
| 1 | -2.964695000 | 7.283860000  | 3.733631000  | 1 | -3.018172000 | 3.443511000  | -4.725253000 |
| 6 | -3.527544000 | 6.964934000  | 1.642241000  | 1 | -7.071355000 | 8.331223000  | -6.106788000 |
| 1 | -4.258904000 | 7.784527000  | 1.632632000  | 1 | -7.306056000 | 7.671762000  | -7.719815000 |
| 1 | -3.973728000 | 6.140939000  | 1.072809000  | 1 | -5.740742000 | 7.101737000  | -4.417898000 |
| 6 | -2.241054000 | 7.395451000  | 1.005801000  | 1 | -6.437778000 | 5.387295000  | -8.292734000 |
| 6 | -1.444864000 | 6.632624000  | 0.175683000  | 1 | -4.035828000 | 5.368523000  | -3.954952000 |
| 7 | -0.331892000 | 7.341624000  | -0.210098000 | 1 | -4.737249000 | 3.643320000  | -7.823642000 |
| 1 | -1.590136000 | 5.616088000  | -0.169132000 | 8 | 1.799175000  | 6.350795000  | -1.802587000 |
| 1 | 0.409217000  | 7.008042000  | -0.842903000 | 8 | 3.291030000  | 7.791996000  | -0.948547000 |
| 6 | -1.571674000 | 8.665283000  | 1.145848000  | 6 | 2.886947000  | 6.639355000  | -1.153928000 |
| 6 | -0.376625000 | 8.588621000  | 0.370708000  | 6 | 3.649930000  | 5.435944000  | -0.569613000 |
| 6 | -1.851523000 | 9.859637000  | 1.838148000  | 1 | 3.028326000  | 5.038990000  | 0.247521000  |
| 6 | 0.534189000  | 9.650649000  | 0.284178000  | 1 | 3.698685000  | 4.640344000  | -1.323897000 |
| 6 | -0.955891000 | 10.919988000 | 1.748298000  | 6 | 5.045048000  | 5.763647000  | -0.503282000 |
| 6 | 0.227729000  | 10.814744000 | 0.983112000  | 1 | 4.977008000  | 6.668728000  | 0.577009000  |
| 1 | -2.754577000 | 9.955139000  | 2.437332000  | 1 | 5.717751000  | 6.024111000  | -0.862097000 |
| 1 | -1.163950000 | 11.845244000 | 2.279871000  | 6 | 5.644687000  | 4.649491000  | 0.842197000  |
| 1 | 0.910887000  | 11.659177000 | 0.940115000  | 1 | 4.995655000  | 4.474174000  | 1.705782000  |
| 1 | 1.447878000  | 9.542552000  | -0.294583000 | 1 | 6.614020000  | 4.978349000  | 1.243408000  |
| 6 | -4.771262000 | 6.073073000  | 3.624322000  | 6 | 5.876763000  | 3.285351000  | 0.200643000  |
| 8 | -5.308100000 | 5.027942000  | 3.220287000  | 8 | 5.748289000  | 2.232207000  | 0.855127000  |
| 7 | -5.384870000 | 6.942165000  | 4.453314000  | 7 | 6.258315000  | 3.271467000  | -1.093976000 |
| 1 | -4.869641000 | 7.759567000  | 4.752887000  | 1 | 6.403185000  | 4.158385000  | -1.556631000 |
| 6 | -6.779854000 | 6.822631000  | 4.881079000  | 6 | 6.604168000  | 2.055179000  | -1.822908000 |
| 1 | -7.198465000 | 7.833606000  | 4.904754000  | 1 | 6.286546000  | 2.184766000  | -2.862309000 |
| 1 | -7.309190000 | 6.268491000  | 4.102142000  | 1 | 6.021618000  | 1.239022000  | -1.391189000 |
| 6 | -6.970213000 | 6.165371000  | 6.259162000  | 6 | 8.108397000  | 1.712015000  | -1.762237000 |
| 1 | -6.429979000 | 6.756262000  | 7.009167000  | 1 | 8.244077000  | 0.748239000  | -2.268535000 |
| 1 | -8.036336000 | 6.241076000  | 6.514249000  | 1 | 8.385141000  | 1.566166000  | -0.711912000 |
| 6 | -6.518043000 | 4.700086000  | 6.361478000  | 6 | 8.993526000  | 2.762758000  | -2.398260000 |
| 1 | -6.614316000 | 4.375532000  | 7.405277000  | 6 | 9.223332000  | 2.762616000  | -3.782924000 |
| 1 | -5.455118000 | 4.613616000  | 6.105583000  | 6 | 9.575047000  | 3.780560000  | -1.628147000 |
| 6 | -7.334998000 | 3.748159000  | 5.474039000  | 6 | 10.008620000 | 3.749920000  | -4.381061000 |
| 1 | -8.401593000 | 3.837012000  | 5.706871000  | 6 | 10.361255000 | 4.771481000  | -2.222215000 |
| 1 | -7.214251000 | 3.999210000  | 4.418862000  | 6 | 10.580108000 | 4.759685000  | -3.601559000 |
| 7 | -6.979660000 | 2.340664000  | 5.653148000  | 1 | 8.786753000  | 1.976957000  | -4.396130000 |
| 1 | -7.345454000 | 1.883712000  | 6.477538000  | 1 | 9.415467000  | 3.792061000  | -0.552500000 |
| 6 | -6.044763000 | 1.654992000  | 4.962165000  | 1 | 10.178323000 | 3.728197000  | -5.454498000 |
| 7 | -5.352856000 | 2.212133000  | 3.967139000  | 1 | 10.805249000 | 5.549240000  | -1.606234000 |
| 1 | -5.358368000 | 3.215581000  | 3.785800000  | 1 | 11.194101000 | 5.527258000  | -4.064993000 |
| 1 | -4.673839000 | 1.628492000  | 3.457092000  | 7 | 1.003273000  | 3.925487000  | -2.313197000 |
| 7 | -5.821119000 | 0.372622000  | 5.278749000  | 1 | 0.624185000  | 3.545125000  | -1.427058000 |
| 1 | -6.463027000 | -0.107761000 | 5.892771000  | 1 | 1.738079000  | 3.291011000  | -2.638189000 |

|   |              |              |              |
|---|--------------|--------------|--------------|
| 1 | 1.417578000  | 4.927825000  | -2.106120000 |
| 6 | -0.165038000 | 3.942793000  | -3.253261000 |
| 1 | -0.350223000 | 4.985875000  | -3.527035000 |
| 6 | -1.401974000 | 3.445983000  | -2.459146000 |
| 8 | -2.498443000 | 3.362436000  | -3.082155000 |
| 8 | -1.217853000 | 3.178493000  | -1.244068000 |
| 6 | 0.113979000  | 3.126739000  | -4.537272000 |
| 1 | -0.823603000 | 3.079497000  | -5.098978000 |
| 1 | 0.813251000  | 3.696458000  | -5.158739000 |
| 6 | 0.684912000  | 1.757729000  | -4.275578000 |
| 6 | 0.056699000  | 0.674537000  | -3.689704000 |
| 1 | -0.961509000 | 0.558171000  | -3.347041000 |
| 7 | 0.951415000  | -0.365711000 | -3.584009000 |
| 1 | 0.729881000  | -1.282609000 | -3.205030000 |
| 6 | 2.159429000  | 0.015286000  | -4.094042000 |
| 6 | 2.037775000  | 1.338211000  | -4.547159000 |
| 6 | 3.131931000  | 1.961547000  | -5.209297000 |
| 6 | 4.299433000  | 1.201573000  | -5.440155000 |
| 6 | 3.407067000  | -0.757677000 | -4.141684000 |
| 6 | 4.436034000  | -0.098270000 | -5.001716000 |
| 1 | 3.061524000  | 2.980898000  | -5.575331000 |
| 1 | 5.110814000  | 1.647353000  | -6.009496000 |
| 1 | 3.291375000  | -1.827633000 | -4.336409000 |
| 1 | 5.341229000  | -0.661748000 | -5.199672000 |
| 7 | 4.097562000  | -0.825486000 | -2.660340000 |
| 8 | 4.998996000  | -1.644862000 | -2.539499000 |
| 8 | 3.738690000  | -0.022881000 | -1.809916000 |

## Model B system – C5

<sup>2</sup>TS4<sub>B,C5-endo</sub>

|    |              |              |              |
|----|--------------|--------------|--------------|
| 26 | -1.665559000 | -4.876806000 | -2.082238000 |
| 7  | -1.338956000 | -4.251825000 | -0.185911000 |
| 7  | 0.260736000  | -5.494919000 | -2.213421000 |
| 7  | -2.041673000 | -5.697501000 | -3.893630000 |
| 7  | -3.624881000 | -4.393610000 | -1.896918000 |
| 6  | -2.242587000 | -3.650361000 | 0.652575000  |
| 6  | -1.597522000 | -3.266701000 | 1.903487000  |
| 6  | -0.296052000 | -3.655321000 | 1.781062000  |
| 6  | -0.142079000 | -4.263186000 | 0.480898000  |
| 6  | 1.233538000  | -5.340573000 | -1.263433000 |
| 6  | 2.490602000  | -5.867030000 | -1.750621000 |
| 6  | 2.257006000  | -6.339246000 | -3.006486000 |
| 6  | 0.857586000  | -6.104255000 | -3.285758000 |
| 6  | -1.129538000 | -6.273984000 | -4.739242000 |
| 6  | -1.771691000 | -6.651539000 | -5.977262000 |
| 6  | -3.079192000 | -6.284666000 | -5.869301000 |
| 6  | -3.236760000 | -5.682203000 | -4.565426000 |
| 6  | -4.602814000 | -4.560644000 | -2.841748000 |
| 6  | -5.858257000 | -4.035400000 | -2.352669000 |
| 6  | -5.619284000 | -3.553150000 | -1.100723000 |
| 6  | -4.217132000 | -3.782877000 | -0.827066000 |
| 6  | -3.583738000 | -3.435768000 | 0.362384000  |
| 6  | 1.055781000  | -4.769984000 | -0.007592000 |
| 6  | 0.220004000  | -6.468932000 | -4.465056000 |
| 6  | -4.432163000 | -5.159420000 | -4.083882000 |
| 1  | -4.194516000 | -2.958125000 | 1.121001000  |
| 1  | 1.923102000  | -4.713437000 | 0.642936000  |
| 1  | 0.821717000  | -6.945995000 | -5.232571000 |
| 1  | -5.300934000 | -5.223150000 | -4.732045000 |
| 1  | 0.503309000  | -3.535411000 | 2.502639000  |
| 1  | 3.416030000  | -5.869497000 | -1.188294000 |
| 1  | 2.951002000  | -6.809395000 | -3.691973000 |
| 1  | -1.270441000 | -7.130630000 | -6.809024000 |
| 1  | -3.875385000 | -6.399146000 | -6.594259000 |
| 1  | -6.789190000 | -4.050101000 | -2.905761000 |
| 1  | -6.314278000 | -3.093266000 | -0.409182000 |
| 6  | -2.248392000 | -2.536617000 | 3.043952000  |
| 6  | -2.406012000 | -1.033363000 | 2.752077000  |
| 6  | -3.148453000 | -0.241323000 | 3.829625000  |
| 8  | -3.517659000 | 0.953664000  | 3.497213000  |
| 8  | -3.344516000 | -0.746716000 | 4.953748000  |
| 1  | -1.651139000 | -2.666263000 | 3.951938000  |
| 1  | -3.235000000 | -2.963470000 | 3.262496000  |
| 1  | -1.416195000 | -0.572819000 | 2.625573000  |
| 1  | -2.921816000 | -0.881596000 | 1.797723000  |
| 16 | -2.204411000 | -7.083197000 | -1.029692000 |
| 1  | -2.280129000 | -7.844834000 | -2.144946000 |
| 8  | -1.306596000 | -3.400326000 | -2.736028000 |
| 7  | 3.327925000  | 1.529170000  | 1.099701000  |
| 1  | 4.249797000  | 1.687928000  | 0.703618000  |
| 1  | 2.890883000  | 2.356177000  | 1.498674000  |
| 6  | 3.027537000  | 0.359646000  | 1.741229000  |
| 8  | 2.028145000  | 0.244226000  | 2.453092000  |
| 6  | 3.958249000  | -0.826931000 | 1.494413000  |
| 1  | 3.711769000  | -1.573483000 | 2.252549000  |
| 1  | 3.715972000  | -1.255809000 | 0.513354000  |
| 6  | 5.465874000  | -0.511431000 | 1.536471000  |
| 1  | 5.761061000  | 0.147054000  | 0.715372000  |
| 1  | 6.011952000  | -1.452712000 | 1.399740000  |
| 6  | 5.910079000  | 0.058453000  | 2.882419000  |
| 8  | 5.727297000  | -0.545470000 | 3.940737000  |
| 7  | 6.537662000  | 1.268665000  | 2.829389000  |
| 1  | 6.615322000  | 1.744971000  | 1.931724000  |
| 6  | 7.110136000  | 1.865426000  | 4.020667000  |
| 1  | 7.557595000  | 1.086745000  | 4.641960000  |
| 1  | 7.903803000  | 2.556243000  | 3.716145000  |
| 6  | 6.141438000  | 2.633325000  | 4.936072000  |
| 8  | 6.360595000  | 2.719920000  | 6.145542000  |
| 7  | 5.096036000  | 3.240202000  | 4.324594000  |
| 1  | 4.905797000  | 3.066035000  | 3.343979000  |
| 6  | 4.023323000  | 3.871746000  | 5.071559000  |
| 1  | 3.809451000  | 3.252967000  | 5.951414000  |

|   |              |              |              |
|---|--------------|--------------|--------------|
| 6 | 4.383991000  | 5.291081000  | 5.607091000  |
| 1 | 5.265325000  | 5.153478000  | 6.240597000  |
| 1 | 3.567804000  | 5.616275000  | 6.263716000  |
| 6 | 4.647259000  | 6.343496000  | 4.553830000  |
| 6 | 5.950235000  | 6.583308000  | 4.093934000  |
| 6 | 3.596611000  | 7.110428000  | 4.025193000  |
| 6 | 6.199505000  | 7.560501000  | 3.126888000  |
| 6 | 3.841714000  | 8.084094000  | 3.054366000  |
| 6 | 5.144778000  | 8.312509000  | 2.603006000  |
| 1 | 6.775909000  | 6.008624000  | 4.506625000  |
| 1 | 2.580915000  | 6.946417000  | 4.379916000  |
| 1 | 7.217246000  | 7.738514000  | 2.788969000  |
| 1 | 3.017423000  | 8.666934000  | 2.652051000  |
| 1 | 5.335581000  | 9.073333000  | 1.851050000  |
| 6 | 2.787970000  | 3.880280000  | 4.160235000  |
| 8 | 2.895346000  | 3.740010000  | 2.936552000  |
| 7 | 1.601080000  | 4.032389000  | 4.785889000  |
| 1 | 1.591819000  | 4.300153000  | 5.761715000  |
| 6 | 0.341487000  | 4.099787000  | 4.069045000  |
| 1 | 0.584095000  | 4.263280000  | 3.013663000  |
| 6 | -0.404101000 | 2.739349000  | 4.148590000  |
| 1 | 0.316454000  | 1.986101000  | 3.799440000  |
| 8 | -1.489857000 | 2.818509000  | 3.221769000  |
| 1 | -2.130391000 | 2.089851000  | 3.393234000  |
| 6 | -0.868942000 | 2.379226000  | 5.560023000  |
| 1 | -0.018367000 | 2.333642000  | 6.248739000  |
| 1 | -1.349389000 | 1.394928000  | 5.565457000  |
| 1 | -1.590517000 | 3.112652000  | 5.936761000  |
| 6 | -0.444072000 | 5.343847000  | 4.539467000  |
| 8 | 0.084796000  | 6.206129000  | 5.246343000  |
| 7 | -1.707629000 | 5.417646000  | 4.061001000  |
| 1 | -2.042269000 | 4.607393000  | 3.538302000  |
| 6 | -2.508885000 | 6.626265000  | 4.106204000  |
| 1 | -1.891779000 | 7.393728000  | 4.578862000  |
| 6 | -2.899726000 | 7.075188000  | 2.664401000  |
| 1 | -3.556019000 | 7.951085000  | 2.753197000  |
| 1 | -3.505078000 | 6.274302000  | 2.223294000  |
| 6 | -1.715614000 | 7.386198000  | 1.798608000  |
| 6 | -1.073164000 | 6.522561000  | 0.933813000  |
| 7 | 0.006991000  | 7.140371000  | 0.347649000  |
| 1 | -1.313802000 | 5.496318000  | 0.683119000  |
| 1 | 0.688131000  | 6.689965000  | -0.283964000 |
| 6 | -0.977148000 | 8.623622000  | 1.748226000  |
| 6 | 0.098554000  | 8.425267000  | 0.832560000  |
| 6 | -1.109683000 | 9.878283000  | 2.374802000  |
| 6 | 1.034463000  | 9.428742000  | 0.545041000  |
| 6 | -0.188218000 | 10.879422000 | 2.087038000  |
| 6 | 0.875958000  | 10.655026000 | 1.184274000  |
| 1 | -1.920963000 | 10.065355000 | 3.075281000  |
| 1 | -0.282927000 | 11.850888000 | 2.565986000  |
| 1 | 1.583108000  | 11.456357000 | 0.985072000  |
| 1 | 1.854841000  | 9.229597000  | -0.139026000 |
| 6 | -3.784159000 | 6.379341000  | 4.920362000  |
| 8 | -4.513470000 | 5.404715000  | 4.678990000  |
| 7 | -4.079250000 | 7.304555000  | 5.857075000  |
| 1 | -3.419127000 | 8.054492000  | 6.015070000  |
| 6 | -5.302103000 | 7.290707000  | 6.658485000  |
| 1 | -5.636817000 | 8.327264000  | 6.766743000  |
| 1 | -6.059931000 | 6.759577000  | 6.078035000  |
| 6 | -5.123283000 | 6.665798000  | 8.053184000  |
| 1 | -4.356203000 | 7.232988000  | 8.595045000  |
| 1 | -6.062020000 | 6.810780000  | 8.605770000  |
| 6 | -4.738845000 | 5.177787000  | 8.065269000  |
| 1 | -4.489226000 | 4.887183000  | 9.093619000  |
| 1 | -3.832790000 | 5.019686000  | 7.468512000  |
| 6 | -5.855531000 | 4.253937000  | 7.554310000  |
| 1 | -6.763389000 | 4.395902000  | 8.150752000  |
| 1 | -6.114378000 | 4.485065000  | 6.519217000  |
| 7 | -5.510098000 | 2.834424000  | 7.630974000  |
| 1 | -5.520814000 | 2.414386000  | 8.550693000  |
| 6 | -4.947403000 | 2.100261000  | 6.646898000  |
| 7 | -4.686776000 | 2.616546000  | 5.446685000  |
| 1 | -4.661410000 | 3.621717000  | 5.277275000  |
| 1 | -4.286788000 | 1.996933000  | 4.720733000  |
| 7 | -4.671728000 | 0.808870000  | 6.876981000  |





|    |              |              |              |   |              |              |              |
|----|--------------|--------------|--------------|---|--------------|--------------|--------------|
| 16 | -0.104348000 | -8.167299000 | 0.380060000  | 1 | -2.101531000 | 9.858499000  | 2.664213000  |
| 1  | -1.082805000 | -8.933124000 | -0.154142000 | 1 | -0.492550000 | 11.714639000 | 2.352795000  |
| 8  | -0.232611000 | -5.040175000 | -2.420414000 | 1 | 1.470404000  | 11.464864000 | 0.863105000  |
| 7  | 3.553184000  | 0.960449000  | 1.477695000  | 1 | 1.873930000  | 9.315839000  | -0.367048000 |
| 1  | 4.466962000  | 1.191978000  | 1.100380000  | 6 | -4.134454000 | 5.987738000  | 4.006403000  |
| 1  | 2.959747000  | 1.755923000  | 1.693426000  | 8 | -4.747872000 | 4.984893000  | 3.605093000  |
| 6  | 3.337700000  | -0.167111000 | 2.206046000  | 7 | -4.655423000 | 6.859999000  | 4.893304000  |
| 8  | 2.292040000  | -0.351370000 | 2.837192000  | 1 | -4.086211000 | 7.644129000  | 5.184348000  |
| 6  | 4.431289000  | -1.235408000 | 2.168480000  | 6 | -6.030850000 | 6.792449000  | 5.390736000  |
| 1  | 4.257154000  | -1.883726000 | 3.030094000  | 1 | -6.404282000 | 7.819383000  | 5.453251000  |
| 1  | 4.281567000  | -1.842415000 | 1.266081000  | 1 | -6.620951000 | 6.274936000  | 4.630714000  |
| 6  | 5.881678000  | -0.719039000 | 2.193794000  | 6 | -6.177549000 | 6.116508000  | 6.764818000  |
| 1  | 6.117330000  | -0.125821000 | 1.306303000  | 1 | -5.579584000 | 6.673217000  | 7.496944000  |
| 1  | 6.550572000  | -1.588103000 | 2.180423000  | 1 | -7.226136000 | 6.224917000  | 7.074819000  |
| 6  | 6.194718000  | 0.050990000  | 3.475392000  | 6 | -5.772229000 | 4.634780000  | 6.817379000  |
| 8  | 6.029479000  | -0.449583000 | 4.589417000  | 1 | -5.803333000 | 4.298989000  | 7.861666000  |
| 7  | 6.685045000  | 1.312139000  | 3.307544000  | 1 | -4.734347000 | 4.515910000  | 6.483764000  |
| 1  | 6.732148000  | 1.709241000  | 2.369712000  | 6 | -6.683164000 | 3.721293000  | 5.982249000  |
| 6  | 7.103078000  | 2.099572000  | 4.450819000  | 1 | -7.723526000 | 3.826295000  | 6.308744000  |
| 1  | 7.605628000  | 1.455692000  | 5.175473000  | 1 | -6.649283000 | 3.994115000  | 6.926211000  |
| 1  | 7.819808000  | 2.854649000  | 4.110231000  | 7 | -6.341036000 | 2.303881000  | 6.098864000  |
| 6  | 5.988182000  | 2.823134000  | 5.225240000  | 1 | -6.615513000 | 1.842266000  | 6.955554000  |
| 8  | 6.116641000  | 3.063303000  | 6.427251000  | 6 | -5.500671000 | 1.614233000  | 5.297315000  |
| 7  | 4.920281000  | 3.222599000  | 4.494604000  | 7 | -4.907030000 | 2.180151000  | 4.246595000  |
| 1  | 4.820803000  | 2.929461000  | 3.528763000  | 1 | -4.878504000 | 3.190058000  | 4.108782000  |
| 6  | 3.742560000  | 3.824573000  | 5.091461000  | 1 | -4.309124000 | 1.590063000  | 3.648183000  |
| 1  | 3.459126000  | 3.238349000  | 5.975103000  | 7 | -5.288537000 | 0.317023000  | 5.548276000  |
| 6  | 3.970881000  | 5.285542000  | 5.586013000  | 1 | -5.821064000 | -0.156141000 | 6.263190000  |
| 1  | 4.766309000  | 5.223978000  | 6.333695000  | 1 | -4.577923000 | -0.219209000 | 5.012635000  |
| 1  | 3.064607000  | 5.607359000  | 6.113009000  | 6 | -7.300639000 | 5.564086000  | -0.766104000 |
| 6  | 4.329448000  | 6.290292000  | 4.514738000  | 1 | -7.397190000 | 6.439412000  | -0.115171000 |
| 6  | 5.671409000  | 6.528195000  | 4.182651000  | 1 | -8.160340000 | 4.909621000  | -0.576826000 |
| 6  | 3.332690000  | 7.014903000  | 3.842246000  | 1 | -7.365942000 | 5.910180000  | -1.804772000 |
| 6  | 6.011346000  | 7.462412000  | 3.201395000  | 6 | -5.978253000 | 4.835876000  | -0.510273000 |
| 6  | 3.668831000  | 7.947399000  | 2.858140000  | 1 | -5.911953000 | 4.529724000  | 0.542263000  |
| 6  | 5.009846000  | 8.174553000  | 2.536015000  | 1 | -5.134915000 | 5.514686000  | -0.689416000 |
| 1  | 6.454273000  | 5.988005000  | 4.709342000  | 6 | -5.813178000 | 3.607587000  | -1.419236000 |
| 1  | 2.287182000  | 6.853116000  | 4.096821000  | 1 | -6.650780000 | 2.910160000  | -1.292909000 |
| 1  | 7.057111000  | 7.639676000  | 2.963481000  | 1 | -5.832255000 | 3.919010000  | -2.467911000 |
| 1  | 2.885801000  | 8.500887000  | 2.346797000  | 7 | -4.549887000 | 2.900183000  | -1.220910000 |
| 1  | 5.270402000  | 8.903283000  | 1.773280000  | 1 | -3.749019000 | 3.176918000  | -1.808497000 |
| 6  | 2.609276000  | 3.718156000  | 4.056430000  | 6 | -4.302899000 | 2.012825000  | -0.253012000 |
| 8  | 2.840748000  | 3.422983000  | 2.878069000  | 7 | -3.068172000 | 1.508434000  | -0.109000000 |
| 7  | 1.363015000  | 3.944957000  | 4.526436000  | 1 | -4.986364000 | 1.021430000  | 1.373995000  |
| 1  | 1.244584000  | 4.364675000  | 5.440449000  | 1 | -6.195776000 | 1.956981000  | 0.555803000  |
| 6  | 0.193858000  | 3.941504000  | 3.666005000  | 7 | -5.278657000 | 1.539878000  | 0.549830000  |
| 1  | 0.537594000  | 4.106285000  | 2.638756000  | 1 | -2.910622000 | 0.996632000  | 0.762523000  |
| 6  | -0.501781000 | 2.553725000  | 3.682868000  | 1 | -2.285776000 | 2.073053000  | -0.466482000 |
| 1  | 0.282991000  | 1.818906000  | 3.449974000  | 6 | -8.663142000 | 7.295225000  | -5.593022000 |
| 8  | -1.458966000 | 2.581522000  | 2.622032000  | 1 | -8.971819000 | 6.411904000  | -6.164221000 |
| 1  | -2.050689000 | 1.797291000  | 2.685575000  | 1 | -9.423497000 | 8.072985000  | -5.732092000 |
| 6  | -1.130721000 | 2.200275000  | 5.031107000  | 1 | -8.650150000 | 7.018231000  | -4.532188000 |
| 1  | -0.373102000 | 2.203559000  | 5.822170000  | 6 | -7.277546000 | 7.789720000  | -6.049568000 |
| 1  | -1.570340000 | 1.197562000  | 4.998041000  | 6 | -6.183982000 | 6.753341000  | -5.883316000 |
| 1  | -1.921697000 | 2.910569000  | 5.295962000  | 6 | -5.425287000 | 6.674829000  | -4.707481000 |
| 6  | -0.697071000 | 5.145386000  | 4.045899000  | 6 | -5.910332000 | 5.815705000  | -6.891615000 |
| 8  | -0.296703000 | 6.008942000  | 4.832433000  | 6 | -4.437140000 | 5.702836000  | -4.532538000 |
| 7  | -1.894187000 | 5.183174000  | 3.415761000  | 6 | -4.930542000 | 4.836903000  | -6.735749000 |
| 1  | -2.136668000 | 4.371234000  | 2.847922000  | 6 | -4.185041000 | 4.767861000  | -5.549234000 |
| 6  | -2.763124000 | 6.345199000  | 3.422179000  | 8 | -3.239925000 | 3.796585000  | -5.440759000 |
| 1  | -2.264776000 | 7.106494000  | 4.026341000  | 1 | -2.845023000 | 3.799764000  | -4.532673000 |
| 6  | -2.995089000 | 6.876729000  | 1.972524000  | 1 | -7.016370000 | 8.692063000  | -5.481801000 |
| 1  | -3.685941000 | 7.727736000  | 2.040416000  | 1 | -7.338172000 | 8.092715000  | -7.102972000 |
| 1  | -3.523236000 | 6.089379000  | 1.421577000  | 1 | -5.599445000 | 7.395583000  | -3.910561000 |
| 6  | -1.745298000 | 7.267039000  | 1.245367000  | 1 | -6.474428000 | 5.853277000  | -7.821746000 |
| 6  | -1.028096000 | 6.472709000  | 0.374002000  | 1 | -3.849533000 | 5.671041000  | -3.619126000 |
| 7  | 0.067596000  | 7.150306000  | -0.104825000 | 1 | -4.727558000 | 4.118306000  | -7.524884000 |
| 1  | -1.222154000 | 5.455875000  | 0.055012000  | 8 | 2.063471000  | 5.929159000  | -1.692511000 |
| 1  | 0.764319000  | 6.770088000  | -0.762330000 | 8 | 3.562986000  | 7.488689000  | -1.101050000 |
| 6  | -1.041323000 | 8.523215000  | 1.314436000  | 6 | 3.199637000  | 6.307537000  | -1.194331000 |
| 6  | 0.091580000  | 8.407755000  | 0.454710000  | 6 | 4.091265000  | 5.185555000  | -0.633034000 |
| 6  | -1.247074000 | 9.735045000  | 2.002112000  | 1 | 3.657435000  | 4.895108000  | 0.336304000  |
| 6  | 1.010570000  | 9.451591000  | 0.278593000  | 1 | 4.009123000  | 4.300981000  | -1.276744000 |
| 6  | -0.341539000 | 10.775927000 | 1.825499000  | 6 | 5.556418000  | 5.583900000  | -0.441694000 |
| 6  | 0.778079000  | 10.634279000 | 0.974827000  | 1 | 5.592082000  | 6.535481000  | 0.095385000  |



|   |              |              |              |   |              |              |              |
|---|--------------|--------------|--------------|---|--------------|--------------|--------------|
| 1 | 0.289639000  | 2.327270000  | 3.792248000  | 6 | -6.368742000 | 9.228000000  | -3.092774000 |
| 8 | -1.553773000 | 2.739234000  | 2.935167000  | 1 | -7.002452000 | 8.929535000  | -3.936228000 |
| 1 | -2.049146000 | 1.904915000  | 3.110431000  | 1 | -6.642233000 | 10.251146000 | -2.807761000 |
| 6 | -1.130459000 | 2.682255000  | 5.364695000  | 1 | -6.602564000 | 8.566921000  | -2.250037000 |
| 1 | -0.366629000 | 2.893509000  | 6.120931000  | 6 | -4.877575000 | 9.136643000  | -3.464817000 |
| 1 | -1.405266000 | 1.626147000  | 5.458428000  | 6 | -4.452047000 | 7.738392000  | -3.863693000 |
| 1 | -2.017935000 | 3.286799000  | 5.580612000  | 6 | -4.015313000 | 6.814293000  | -2.904574000 |
| 6 | -1.144802000 | 5.532949000  | 4.042796000  | 6 | -4.513908000 | 7.307493000  | -5.197558000 |
| 8 | -0.835459000 | 6.571316000  | 4.634398000  | 6 | -3.655169000 | 5.511660000  | -3.252389000 |
| 7 | -2.373009000 | 5.276368000  | 3.536304000  | 6 | -4.156942000 | 6.010648000  | -5.565409000 |
| 1 | -2.492245000 | 4.361086000  | 3.098981000  | 6 | -3.723700000 | 5.098774000  | -4.592604000 |
| 6 | -3.394628000 | 6.291593000  | 3.352840000  | 8 | -3.375467000 | 3.843927000  | -4.991759000 |
| 1 | -2.964024000 | 7.237097000  | 3.690402000  | 1 | -3.107778000 | 3.300476000  | -4.203381000 |
| 6 | -3.794793000 | 6.389581000  | 1.847984000  | 1 | -4.275205000 | 9.473730000  | -2.611371000 |
| 1 | -4.539223000 | 7.189675000  | 1.748526000  | 1 | -4.671206000 | 9.833997000  | -4.287104000 |
| 1 | -4.304158000 | 5.453890000  | 1.588673000  | 1 | -3.939150000 | 7.116498000  | -1.861936000 |
| 6 | -2.625005000 | 6.623228000  | 0.937932000  | 1 | -4.842987000 | 8.002764000  | -5.967780000 |
| 6 | -1.805368000 | 5.646195000  | 0.406271000  | 1 | -3.308761000 | 4.816102000  | -2.493568000 |
| 7 | -0.774326000 | 6.209165000  | -0.305121000 | 1 | -4.201998000 | 5.691101000  | -6.602928000 |
| 1 | -1.876581000 | 4.659941000  | 0.501038000  | 8 | 1.366410000  | 4.612967000  | -1.125394000 |
| 1 | 0.014467000  | 5.682676000  | -0.720067000 | 8 | 2.707734000  | 6.392633000  | -1.412539000 |
| 6 | -2.055418000 | 7.883162000  | 0.528041000  | 6 | 2.517208000  | 5.208588000  | -1.098186000 |
| 6 | -0.892496000 | 7.578065000  | -0.242058000 | 6 | 3.682300000  | 4.362558000  | -0.553446000 |
| 6 | -2.398919000 | 9.235515000  | 0.724845000  | 1 | 3.645836000  | 4.465480000  | 0.541263000  |
| 6 | -0.073412000 | 8.573588000  | -0.793173000 | 1 | 3.490648000  | 3.302468000  | -0.758600000 |
| 6 | -1.594170000 | 10.225852000 | 0.171394000  | 6 | 5.060685000  | 4.778668000  | -1.073462000 |
| 6 | -0.439223000 | 9.898278000  | -0.575358000 | 1 | 5.153613000  | 5.865752000  | -0.990890000 |
| 1 | -3.279197000 | 9.505077000  | 1.304571000  | 1 | 5.135770000  | 4.546360000  | -2.144509000 |
| 1 | -1.851323000 | 11.271691000 | 0.319962000  | 6 | 6.235653000  | 4.128990000  | -0.308950000 |
| 1 | 0.172382000  | 10.696682000 | -0.987758000 | 1 | 6.262965000  | 4.504378000  | 0.718109000  |
| 1 | 0.817194000  | 8.298970000  | -1.351688000 | 1 | 7.183046000  | 4.404850000  | -0.789972000 |
| 6 | -4.629219000 | 5.923166000  | 4.185136000  | 6 | 6.141289000  | 2.611442000  | -0.212716000 |
| 8 | -5.200468000 | 4.833099000  | 4.017413000  | 8 | 5.965305000  | 2.037316000  | 0.880183000  |
| 7 | -5.061868000 | 6.848995000  | 5.064265000  | 7 | 6.230750000  | 1.932813000  | -1.375720000 |
| 1 | -4.526124000 | 7.700996000  | 5.167043000  | 1 | 6.382906000  | 2.463309000  | -2.224195000 |
| 6 | -6.261355000 | 6.687321000  | 5.885738000  | 6 | 6.089093000  | 0.485281000  | -1.506984000 |
| 1 | -6.741814000 | 7.667887000  | 5.960077000  | 1 | 5.234105000  | 0.268263000  | -2.156849000 |
| 1 | -6.939603000 | 6.029764000  | 5.337040000  | 1 | 5.864262000  | 0.098125000  | -0.512375000 |
| 6 | -5.985276000 | 6.149840000  | 7.300948000  | 6 | 7.352692000  | -0.198270000 | -2.065905000 |
| 1 | -5.303253000 | 6.841373000  | 7.811176000  | 1 | 7.157892000  | -1.277954000 | -2.064079000 |
| 1 | -6.932323000 | 6.184310000  | 7.857301000  | 1 | 8.186229000  | -0.017206000 | -1.377241000 |
| 6 | -5.395921000 | 4.731881000  | 7.374575000  | 6 | 7.724214000  | 0.257522000  | -3.463071000 |
| 1 | -5.126930000 | 4.519472000  | 8.417050000  | 6 | 7.036724000  | -0.236206000 | -4.584444000 |
| 1 | -4.465328000 | 4.680253000  | 6.797060000  | 6 | 8.744165000  | 1.198902000  | -3.664667000 |
| 6 | -6.362119000 | 3.640166000  | 6.887976000  | 6 | 7.365396000  | 0.200646000  | -5.868987000 |
| 1 | -7.299546000 | 3.687470000  | 7.452233000  | 6 | 9.073863000  | 1.637863000  | -4.950349000 |
| 1 | -6.614418000 | 3.781253000  | 5.835274000  | 6 | 8.385217000  | 1.138652000  | -6.057352000 |
| 7 | -5.836301000 | 2.284383000  | 7.055425000  | 1 | 6.235692000  | -0.959319000 | -4.449421000 |
| 1 | -5.865377000 | 1.900663000  | 7.990462000  | 1 | 9.291179000  | 1.584664000  | -2.807129000 |
| 6 | -5.097002000 | 1.602836000  | 6.154602000  | 1 | 6.825853000  | -0.195303000 | -6.725603000 |
| 7 | -4.831186000 | 2.100148000  | 4.945450000  | 1 | 9.870591000  | 2.365167000  | -5.084746000 |
| 1 | -4.976706000 | 3.082587000  | 4.714050000  | 1 | 8.641318000  | 1.474826000  | -7.058628000 |
| 1 | -4.251465000 | 1.536351000  | 4.303352000  | 7 | 0.862898000  | 2.321190000  | -2.271723000 |
| 7 | -4.644013000 | 0.382985000  | 6.472532000  | 1 | 0.554118000  | 1.542267000  | -1.662293000 |
| 1 | -4.967184000 | -0.072927000 | 7.313268000  | 1 | 1.642918000  | 2.013854000  | -2.853833000 |
| 1 | -4.069023000 | -0.165805000 | 5.803857000  | 1 | 1.185906000  | 3.172946000  | -1.679776000 |
| 6 | -8.262103000 | 3.204518000  | -2.067469000 | 6 | -0.347257000 | 2.721998000  | -3.069838000 |
| 1 | -8.646899000 | 4.222434000  | -1.945692000 | 1 | -0.479621000 | 3.789119000  | -2.874286000 |
| 1 | -8.953877000 | 2.521369000  | -1.559613000 | 6 | -1.558176000 | 1.972160000  | -2.464241000 |
| 1 | -8.281631000 | 2.965403000  | -3.137557000 | 8 | -2.708064000 | 2.304265000  | -2.874312000 |
| 6 | -6.843670000 | 3.085120000  | -1.500841000 | 8 | -1.298847000 | 1.113878000  | -1.585028000 |
| 1 | -6.841126000 | 3.361346000  | -0.437530000 | 6 | -0.172682000 | 2.543827000  | -4.596757000 |
| 1 | -6.174375000 | 3.793237000  | -2.005171000 | 1 | -0.844575000 | 3.272045000  | -5.059661000 |
| 6 | -6.275242000 | 1.666570000  | -1.666847000 | 1 | 0.843608000  | 2.875530000  | -4.854738000 |
| 1 | -6.913277000 | 0.929190000  | -1.166020000 | 6 | -0.471812000 | 1.205026000  | -5.218186000 |
| 1 | -6.262057000 | 1.397006000  | -2.728044000 | 6 | -1.510815000 | 1.013822000  | -6.099017000 |
| 7 | -4.906401000 | 1.518705000  | -1.177577000 | 1 | -2.278878000 | 1.711398000  | -6.403572000 |
| 1 | -4.134714000 | 1.753998000  | -1.819900000 | 7 | -1.475620000 | -0.267957000 | -6.606121000 |
| 6 | -4.561533000 | 1.158145000  | 0.062724000  | 1 | -2.125966000 | -0.644360000 | -7.280385000 |
| 7 | -3.283665000 | 0.966362000  | 0.376971000  | 6 | -0.411081000 | -0.940374000 | -6.067312000 |
| 1 | -5.145808000 | 0.737535000  | 1.949907000  | 6 | 0.248988000  | -0.056831000 | -5.159021000 |
| 1 | -6.379325000 | 1.421470000  | 0.9744417000 | 6 | 1.366716000  | -0.514342000 | -4.467136000 |
| 7 | -5.500464000 | 0.926429000  | 1.017395000  | 6 | 1.791111000  | -1.925819000 | -4.605955000 |
| 1 | -3.050346000 | 0.797484000  | 1.360197000  | 6 | 0.082759000  | -2.236003000 | -6.372304000 |
| 1 | -2.553116000 | 0.958121000  | -0.349855000 | 6 | 1.193051000  | -2.688305000 | -5.726910000 |

|                                             |              |              |              |   |              |              |              |
|---------------------------------------------|--------------|--------------|--------------|---|--------------|--------------|--------------|
| 1                                           | 1.928286000  | 0.096388000  | -3.772046000 | 6 | 5.215102000  | 3.177720000  | 5.547863000  |
| 1                                           | 1.527838000  | -2.502894000 | -3.594752000 | 8 | 5.262660000  | 3.375252000  | 6.763210000  |
| 1                                           | -0.404812000 | -2.845333000 | -7.128455000 | 7 | 4.236468000  | 3.669922000  | 4.750381000  |
| 1                                           | 1.599443000  | -3.667748000 | -5.944574000 | 1 | 4.190428000  | 3.397993000  | 3.773991000  |
| 7                                           | 3.317734000  | -2.023088000 | -4.559936000 | 6 | 3.031615000  | 4.281867000  | 5.280974000  |
| 8                                           | 3.902532000  | -2.693209000 | -5.404936000 | 1 | 2.685359000  | 3.683004000  | 6.132939000  |
| 8                                           | 3.880923000  | -1.434888000 | -3.634947000 | 6 | 3.245570000  | 5.727629000  | 5.820465000  |
| <b><sup>2</sup>INT5<sub>B,C5-endo</sub></b> |              |              |              | 1 | 3.996002000  | 5.639167000  | 6.611187000  |
| 26                                          | 0.966956000  | -6.197925000 | -0.537000000 | 1 | 2.313206000  | 6.046039000  | 6.302511000  |
| 7                                           | 0.469404000  | -4.906348000 | 0.948958000  | 6 | 3.673253000  | 6.754470000  | 4.796939000  |
| 7                                           | 2.737444000  | -6.519804000 | 0.394422000  | 6 | 5.033224000  | 7.006464000  | 4.564595000  |
| 7                                           | 1.449734000  | -7.512883000 | -2.001031000 | 6 | 2.720692000  | 7.484681000  | 4.068741000  |
| 7                                           | -0.806758000 | -5.881260000 | -1.458810000 | 6 | 5.434217000  | 7.961418000  | 3.626957000  |
| 6                                           | -0.727083000 | -4.246411000 | 1.074199000  | 6 | 3.118049000  | 8.436942000  | 3.127693000  |
| 6                                           | -0.750221000 | -3.462221000 | 2.305728000  | 6 | 4.476681000  | 8.679237000  | 2.905708000  |
| 6                                           | 0.470074000  | -3.653415000 | 2.885792000  | 1 | 5.781107000  | 6.460144000  | 5.134115000  |
| 6                                           | 1.217495000  | -4.555827000 | 2.041184000  | 1 | 1.661004000  | 7.309474000  | 4.243497000  |
| 6                                           | 3.199507000  | -5.944048000 | 1.548115000  | 1 | 6.492747000  | 8.149740000  | 3.466563000  |
| 6                                           | 4.521724000  | -6.442332000 | 1.859247000  | 1 | 2.368196000  | 8.992659000  | 2.571055000  |
| 6                                           | 4.845978000  | -7.328990000 | 0.877239000  | 1 | 4.784887000  | 9.423286000  | 2.176289000  |
| 6                                           | 3.723684000  | -7.370027000 | -0.035917000 | 6 | 1.970324000  | 4.202092000  | 4.172171000  |
| 6                                           | 2.618171000  | -8.220101000 | -2.087620000 | 8 | 2.283546000  | 3.946802000  | 3.002930000  |
| 6                                           | 2.615534000  | -9.040629000 | -3.280331000 | 7 | 0.693746000  | 4.395623000  | 4.564994000  |
| 6                                           | 1.430974000  | -8.808957000 | -3.912419000 | 1 | 0.503324000  | 4.754656000  | 5.491788000  |
| 6                                           | 0.711097000  | -7.848993000 | -3.103772000 | 6 | -0.421054000 | 4.327778000  | 3.639328000  |
| 6                                           | -1.248103000 | -6.419533000 | -2.639188000 | 1 | -0.015518000 | 4.468293000  | 2.631700000  |
| 6                                           | -2.562536000 | -5.906897000 | -2.959199000 | 6 | -1.065515000 | 2.915536000  | 3.664123000  |
| 6                                           | -2.907018000 | -5.059139000 | -1.948677000 | 1 | -0.243489000 | 2.203076000  | 3.508150000  |
| 6                                           | -1.799951000 | -5.052704000 | -1.014924000 | 8 | -1.954479000 | 2.867101000  | 2.545685000  |
| 6                                           | -1.776615000 | -4.308488000 | 0.164380000  | 1 | -2.464128000 | 2.024196000  | 2.568963000  |
| 6                                           | 2.497176000  | -5.024357000 | 2.323101000  | 6 | -1.772815000 | 2.586503000  | 4.980094000  |
| 6                                           | 3.673023000  | -8.161519000 | -1.179185000 | 1 | -1.073358000 | 2.638718000  | 5.821653000  |
| 6                                           | -0.548234000 | -7.341430000 | -3.411798000 | 1 | -2.176481000 | 1.568594000  | 4.950049000  |
| 1                                           | -2.664682000 | -3.724374000 | 0.385650000  | 1 | -2.602909000 | 3.277063000  | 5.166217000  |
| 1                                           | 2.979672000  | -4.654324000 | 3.222740000  | 6 | -1.374998000 | 5.509404000  | 3.911405000  |
| 1                                           | 4.537723000  | -8.785804000 | -1.385741000 | 8 | -1.061864000 | 6.421857000  | 4.681010000  |
| 1                                           | -1.021487000 | -7.693746000 | -4.323738000 | 7 | -2.528594000 | 5.466300000  | 3.204227000  |
| 1                                           | 0.830678000  | -3.239885000 | 3.820285000  | 1 | -2.705073000 | 4.616701000  | 2.667427000  |
| 1                                           | 5.107025000  | -6.143508000 | 2.720147000  | 6 | -3.451954000 | 6.579266000  | 3.115525000  |
| 1                                           | 5.754097000  | -7.908417000 | 0.764203000  | 1 | -3.051281000 | 7.371171000  | 3.752324000  |
| 1                                           | 3.423805000  | -9.696429000 | -3.580139000 | 6 | -3.576523000 | 7.093299000  | 1.646109000  |
| 1                                           | 1.064398000  | -9.236032000 | -4.837868000 | 1 | -4.304852000 | 7.915185000  | 1.643200000  |
| 1                                           | -3.132895000 | -6.175064000 | -3.840172000 | 1 | -4.017057000 | 6.282072000  | 1.054127000  |
| 1                                           | -3.819480000 | -4.487872000 | -1.828115000 | 6 | -2.278427000 | 7.530277000  | 1.040704000  |
| 6                                           | -1.911656000 | -2.677886000 | 2.849249000  | 6 | -1.441621000 | 6.753623000  | 0.265699000  |
| 6                                           | -2.097093000 | -1.266422000 | 2.259544000  | 7 | -0.322676000 | 7.464108000  | -0.096141000 |
| 6                                           | -3.254099000 | -0.486357000 | 2.898378000  | 1 | -1.561457000 | 5.726479000  | -0.055781000 |
| 8                                           | -3.567704000 | 0.644686000  | 2.346704000  | 1 | 0.454633000  | 7.103788000  | -0.668544000 |
| 8                                           | -3.822059000 | -0.945850000 | 3.909567000  | 6 | -1.628096000 | 8.810472000  | 1.172984000  |
| 1                                           | -1.791279000 | -2.577011000 | 3.932581000  | 6 | -0.401712000 | 8.725137000  | 0.448357000  |
| 1                                           | -2.841591000 | -3.241559000 | 2.704108000  | 6 | -1.946348000 | 10.020202000 | 1.820428000  |
| 1                                           | -1.178700000 | -0.678228000 | 2.395336000  | 6 | 0.501388000  | 9.794372000  | 0.369431000  |
| 1                                           | -2.267179000 | -1.306533000 | 1.176480000  | 6 | -1.057481000 | 11.086949000 | 1.738062000  |
| 16                                          | -0.012820000 | -8.005488000 | 0.747399000  | 6 | 0.156816000  | 10.973564000 | 1.023819000  |
| 1                                           | -0.729439000 | -8.596858000 | -0.235758000 | 1 | -2.873887000 | 10.122590000 | 2.379770000  |
| 8                                           | 1.723560000  | -4.838306000 | -1.535181000 | 1 | -1.295456000 | 12.023941000 | 2.235471000  |
| 7                                           | 2.857202000  | 1.446113000  | 1.611580000  | 1 | 0.833271000  | 11.823603000 | 0.984892000  |
| 1                                           | 3.788642000  | 1.596269000  | 1.238243000  | 1 | 1.437217000  | 9.681050000  | -0.171496000 |
| 1                                           | 2.331847000  | 2.292022000  | 1.812585000  | 6 | -4.844204000 | 6.148792000  | 3.586857000  |
| 6                                           | 2.566618000  | 0.363740000  | 2.383398000  | 8 | -5.353702000 | 5.089679000  | 3.184697000  |
| 8                                           | 1.514180000  | 0.279134000  | 3.025356000  | 7 | -5.492431000 | 7.021528000  | 4.384165000  |
| 6                                           | 3.585671000  | -0.775304000 | 2.382012000  | 1 | -4.995929000 | 7.847691000  | 4.691002000  |
| 1                                           | 3.315266000  | -1.434147000 | 3.209841000  | 6 | -6.886661000 | 6.871492000  | 4.798111000  |
| 1                                           | 3.469405000  | -1.344131000 | 1.450951000  | 1 | -7.331996000 | 7.871201000  | 4.809553000  |
| 6                                           | 5.059747000  | -0.345110000 | 2.512232000  | 1 | -7.395061000 | 6.295766000  | 4.021014000  |
| 1                                           | 5.389834000  | 0.227657000  | 1.641581000  | 6 | -7.062063000 | 6.223510000  | 6.180614000  |
| 1                                           | 5.673264000  | -1.253995000 | 2.539943000  | 1 | -6.525108000 | 6.828197000  | 6.921980000  |
| 6                                           | 5.342944000  | 0.408141000  | 3.810136000  | 1 | -8.127303000 | 6.288022000  | 6.443073000  |
| 8                                           | 5.080862000  | -0.072679000 | 4.914440000  | 6 | -6.592420000 | 4.764380000  | 6.297952000  |
| 7                                           | 5.928652000  | 1.632037000  | 3.669152000  | 1 | -6.668305000 | 4.456926000  | 7.348636000  |
| 1                                           | 6.041439000  | 2.025907000  | 2.735873000  | 1 | -5.533115000 | 4.683667000  | 6.026421000  |
| 6                                           | 6.331701000  | 2.398196000  | 4.832308000  | 6 | -7.414537000 | 3.787446000  | 5.442471000  |
| 1                                           | 6.762491000  | 1.730539000  | 5.581255000  | 1 | -8.477132000 | 3.865397000  | 5.696431000  |
| 1                                           | 7.103291000  | 3.113168000  | 4.526587000  | 1 | -7.320274000 | 4.021703000  | 4.380588000  |
|                                             |              |              |              | 7 | -7.033857000 | 2.387740000  | 5.636414000  |



|    |              |              |              |   |              |              |              |
|----|--------------|--------------|--------------|---|--------------|--------------|--------------|
| 8  | -3.517996000 | 0.954553000  | 3.496685000  | 6 | -0.976316000 | 8.625066000  | 1.749668000  |
| 8  | -3.345152000 | -0.746561000 | 4.952374000  | 6 | 0.099409000  | 8.426970000  | 0.833967000  |
| 1  | -1.651808000 | -2.665508000 | 3.949906000  | 6 | -1.108608000 | 9.879418000  | 2.376914000  |
| 1  | -3.235470000 | -2.962587000 | 3.259984000  | 6 | 1.035573000  | 9.430385000  | 0.547074000  |
| 1  | -1.416759000 | -0.571569000 | 2.624195000  | 6 | -0.186888000 | 10.880502000 | 2.089770000  |
| 1  | -2.922418000 | -0.880076000 | 1.796296000  | 6 | 0.877303000  | 10.656359000 | 1.186965000  |
| 16 | -2.204411000 | -7.083197000 | -1.029692000 | 1 | -1.919898000 | 10.066297000 | 3.077434000  |
| 1  | -2.279330000 | -7.845210000 | -2.144399000 | 1 | -0.281411000 | 11.851727000 | 2.569242000  |
| 8  | -1.305733000 | -3.401795000 | -2.739143000 | 1 | 1.584653000  | 11.457635000 | 0.988254000  |
| 7  | 3.328051000  | 1.529095000  | 1.100153000  | 1 | 1.855964000  | 9.231447000  | -0.137040000 |
| 1  | 4.249877000  | 1.687789000  | 0.703939000  | 6 | -3.783920000 | 6.379648000  | 4.920469000  |
| 1  | 2.891019000  | 2.356188000  | 1.498959000  | 8 | -4.512997000 | 5.404877000  | 4.678991000  |
| 6  | 3.027753000  | 0.359716000  | 1.741987000  | 7 | -4.079301000 | 7.304789000  | 5.857163000  |
| 8  | 2.028408000  | 0.244435000  | 2.453943000  | 1 | -3.419330000 | 8.054838000  | 6.015257000  |
| 6  | 3.958467000  | -0.826903000 | 1.495392000  | 6 | -5.302203000 | 7.290657000  | 6.658482000  |
| 1  | 3.712162000  | -1.573214000 | 2.253824000  | 1 | -5.637175000 | 8.327173000  | 6.766719000  |
| 1  | 3.715998000  | -1.256096000 | 0.514524000  | 1 | -6.059867000 | 6.759341000  | 6.077987000  |
| 6  | 5.466092000  | -0.511371000 | 1.537046000  | 6 | -5.123283000 | 6.665798000  | 8.053184000  |
| 1  | 5.761095000  | 0.146969000  | 0.715760000  | 1 | -4.356242000 | 7.233082000  | 8.595003000  |
| 1  | 6.012154000  | -1.452668000 | 1.400369000  | 1 | -6.062010000 | 6.810692000  | 8.605810000  |
| 6  | 5.910545000  | 0.058764000  | 2.882800000  | 6 | -4.738685000 | 5.177815000  | 8.065303000  |
| 8  | 5.727985000  | -0.544980000 | 3.941260000  | 1 | -4.488805000 | 4.887315000  | 9.093618000  |
| 7  | 6.538046000  | 1.268998000  | 2.829451000  | 1 | -3.832750000 | 5.019760000  | 7.468354000  |
| 1  | 6.615495000  | 1.745192000  | 1.931707000  | 6 | -5.855403000 | 4.253809000  | 7.554679000  |
| 6  | 7.110514000  | 1.866050000  | 4.020585000  | 1 | -6.763098000 | 4.395664000  | 8.151394000  |
| 1  | 7.558331000  | 1.087585000  | 4.641890000  | 1 | -6.114609000 | 4.484902000  | 6.519665000  |
| 1  | 7.903891000  | 2.557114000  | 3.715870000  | 7 | -5.509805000 | 2.834319000  | 7.631209000  |
| 6  | 6.141656000  | 2.633688000  | 4.936040000  | 1 | -5.520391000 | 2.414169000  | 8.550877000  |
| 8  | 6.360807000  | 2.720298000  | 6.145511000  | 6 | -4.947403000 | 2.100261000  | 6.646898000  |
| 7  | 5.096106000  | 3.240337000  | 4.324590000  | 7 | -4.687035000 | 2.616747000  | 5.446710000  |
| 1  | 4.905937000  | 3.066235000  | 3.343952000  | 1 | -4.661517000 | 3.621951000  | 5.277519000  |
| 6  | 4.023323000  | 3.871746000  | 5.071559000  | 1 | -4.287122000 | 1.997283000  | 4.720583000  |
| 1  | 3.809358000  | 3.252821000  | 5.951291000  | 7 | -4.671691000 | 0.808813000  | 6.876672000  |
| 6  | 4.383968000  | 5.290985000  | 5.607369000  | 1 | -5.027597000 | 0.354818000  | 7.705030000  |
| 1  | 5.265178000  | 5.153235000  | 6.241010000  | 1 | -4.199387000 | 0.229671000  | 6.156092000  |
| 1  | 3.567682000  | 5.616140000  | 6.263889000  | 6 | -7.332534000 | 0.370746000  | -3.744286000 |
| 6  | 4.647502000  | 6.343515000  | 4.554295000  | 1 | -8.315734000 | 0.801430000  | -3.961387000 |
| 6  | 5.950569000  | 6.583214000  | 4.094595000  | 1 | -7.481568000 | -0.673442000 | -3.443445000 |
| 6  | 3.597023000  | 7.110656000  | 4.025633000  | 1 | -6.753163000 | 0.371682000  | -4.675208000 |
| 6  | 6.200089000  | 7.560496000  | 3.127705000  | 6 | -6.614079000 | 1.168652000  | -2.651552000 |
| 6  | 3.842378000  | 8.084423000  | 3.054971000  | 1 | -7.235761000 | 1.209682000  | -1.746542000 |
| 6  | 5.145527000  | 8.312718000  | 2.603798000  | 1 | -6.468569000 | 2.206141000  | -2.976715000 |
| 1  | 6.776114000  | 6.008368000  | 4.507319000  | 6 | -5.242643000 | 0.563672000  | -2.316279000 |
| 1  | 2.581262000  | 6.946727000  | 4.380207000  | 1 | -5.344362000 | -0.474578000 | -1.976826000 |
| 1  | 7.217896000  | 7.738416000  | 2.789933000  | 1 | -4.623345000 | 0.539358000  | -3.218218000 |
| 1  | 3.018218000  | 8.667440000  | 2.652648000  | 7 | -4.483051000 | 1.329799000  | -1.326070000 |
| 1  | 5.336524000  | 9.073616000  | 1.851965000  | 1 | -3.755524000 | 1.967022000  | -1.683799000 |
| 6  | 2.788037000  | 3.880451000  | 4.160154000  | 6 | -4.519496000 | 1.149676000  | -0.004522000 |
| 8  | 2.895471000  | 3.740326000  | 2.936458000  | 7 | -3.693607000 | 1.828571000  | 0.793364000  |
| 7  | 1.601128000  | 4.032541000  | 4.785775000  | 1 | -5.474444000 | 0.280940000  | 1.561194000  |
| 1  | 1.591847000  | 4.300232000  | 5.761622000  | 1 | -6.209290000 | -0.014013000 | 0.047674000  |
| 6  | 0.341563000  | 4.100129000  | 4.068907000  | 7 | -5.380044000 | 0.259171000  | 0.554156000  |
| 1  | 0.584201000  | 4.263689000  | 3.013545000  | 1 | -3.626618000 | 1.544146000  | 1.779462000  |
| 6  | -0.404172000 | 2.739764000  | 4.148322000  | 1 | -2.880293000 | 2.307642000  | 0.378693000  |
| 1  | 0.316323000  | 1.986463000  | 3.799162000  | 6 | -8.241224000 | 4.686078000  | -7.313429000 |
| 8  | -1.489870000 | 2.819117000  | 3.221455000  | 1 | -8.449560000 | 3.628607000  | -7.513737000 |
| 1  | -2.130517000 | 2.090541000  | 3.392850000  | 1 | -8.968953000 | 5.287545000  | -7.871282000 |
| 6  | -0.869124000 | 2.379583000  | 5.559704000  | 1 | -8.404291000 | 4.861240000  | -6.243612000 |
| 1  | -0.018594000 | 2.333873000  | 6.248467000  | 6 | -6.799933000 | 5.048779000  | -7.716142000 |
| 1  | -1.349655000 | 1.395324000  | 5.565029000  | 6 | -5.753309000 | 4.244202000  | -6.972337000 |
| 1  | -1.590660000 | 3.113040000  | 5.936455000  | 6 | -5.232813000 | 4.683552000  | -5.747111000 |
| 6  | -0.443886000 | 5.344206000  | 4.539467000  | 6 | -5.294728000 | 3.013468000  | -7.466325000 |
| 8  | 0.085010000  | 6.206273000  | 5.246588000  | 6 | -4.294989000 | 3.933179000  | -5.035496000 |
| 7  | -1.707371000 | 5.418260000  | 4.060868000  | 6 | -4.359145000 | 2.248637000  | -6.771253000 |
| 1  | -2.042113000 | 4.608122000  | 3.538060000  | 6 | -3.850427000 | 2.704871000  | -5.547230000 |
| 6  | -2.508589000 | 6.626881000  | 4.106314000  | 8 | -2.933749000 | 1.927568000  | -4.903618000 |
| 1  | -1.891499000 | 7.394119000  | 4.579538000  | 1 | -2.665173000 | 2.348224000  | -4.049005000 |
| 6  | -2.899281000 | 7.076477000  | 2.664857000  | 1 | -6.637873000 | 6.119177000  | -7.535044000 |
| 1  | -3.555526000 | 7.952376000  | 2.753996000  | 1 | -6.682204000 | 4.894882000  | -8.796591000 |
| 1  | -3.504635000 | 6.275829000  | 2.223319000  | 1 | -5.561565000 | 5.637179000  | -5.338108000 |
| 6  | -1.715062000 | 7.387777000  | 1.799313000  | 1 | -5.673617000 | 2.646046000  | -8.418214000 |
| 6  | -1.072749000 | 6.524476000  | 0.934087000  | 1 | -3.898367000 | 4.294524000  | -4.090602000 |
| 7  | 0.007583000  | 7.142368000  | 0.348333000  | 1 | -4.005474000 | 1.300798000  | -7.167114000 |
| 1  | -1.313618000 | 5.498426000  | 0.682824000  | 8 | 1.980094000  | 5.742645000  | -1.118052000 |
| 1  | 0.688730000  | 6.692096000  | -0.283369000 | 8 | 3.461273000  | 7.416283000  | -0.922561000 |





|   |              |              |              |   |              |              |              |
|---|--------------|--------------|--------------|---|--------------|--------------|--------------|
| 8 | 2.843530000  | 3.420397000  | 2.876937000  | 7 | -3.067862000 | 1.508230000  | -0.110984000 |
| 7 | 1.364555000  | 3.946810000  | 4.522969000  | 1 | -4.984292000 | 1.022891000  | 1.374073000  |
| 1 | 1.245981000  | 4.368705000  | 5.435996000  | 1 | -6.193756000 | 1.959491000  | 0.557989000  |
| 6 | 0.195545000  | 3.943127000  | 3.662332000  | 7 | -5.278002000 | 1.539428000  | 0.549155000  |
| 1 | 0.538991000  | 4.108529000  | 2.635063000  | 1 | -2.909648000 | 0.996961000  | 0.760702000  |
| 6 | -0.499482000 | 2.554987000  | 3.678921000  | 1 | -2.285717000 | 2.072534000  | -0.469520000 |
| 1 | 0.285417000  | 1.820465000  | 3.445417000  | 6 | -8.663157000 | 7.295231000  | -5.593013000 |
| 8 | -1.457244000 | 2.582799000  | 2.618573000  | 1 | -8.974014000 | 6.409328000  | -6.158994000 |
| 1 | -2.049471000 | 1.799027000  | 2.683117000  | 1 | -9.424011000 | 8.072399000  | -5.732694000 |
| 6 | -1.127587000 | 2.200816000  | 5.027371000  | 1 | -8.646105000 | 7.023091000  | -4.530979000 |
| 1 | -0.369563000 | 2.204218000  | 5.818035000  | 6 | -7.279283000 | 7.787402000  | -6.057192000 |
| 1 | -1.566742000 | 1.197910000  | 4.994231000  | 6 | -6.185628000 | 6.751308000  | -5.890115000 |
| 1 | -1.918780000 | 2.910630000  | 5.292848000  | 6 | -5.426468000 | 6.674605000  | -4.714441000 |
| 6 | -0.695821000 | 5.146481000  | 4.043200000  | 6 | -5.912805000 | 5.811852000  | -6.896896000 |
| 8 | -0.294941000 | 6.010145000  | 4.829371000  | 6 | -4.438666000 | 5.702574000  | -4.538241000 |
| 7 | -1.893843000 | 5.183722000  | 3.414779000  | 6 | -4.933264000 | 4.832958000  | -6.739775000 |
| 1 | -2.136205000 | 4.372169000  | 2.846335000  | 6 | -4.187344000 | 4.765736000  | -5.553451000 |
| 6 | -2.762645000 | 6.345914000  | 3.421814000  | 8 | -3.242536000 | 3.794349000  | -5.443407000 |
| 1 | -2.264115000 | 7.106805000  | 4.026334000  | 1 | -2.847462000 | 3.799698000  | -4.535375000 |
| 6 | -2.994575000 | 6.878347000  | 1.972481000  | 1 | -7.015782000 | 8.692327000  | -5.494624000 |
| 1 | -3.684252000 | 7.730258000  | 2.041000000  | 1 | -7.343801000 | 8.085417000  | -7.111769000 |
| 1 | -3.523906000 | 6.091937000  | 1.421337000  | 1 | -5.600083000 | 7.396815000  | -3.918721000 |
| 6 | -1.744429000 | 7.267122000  | 1.245144000  | 1 | -6.477343000 | 5.848002000  | -7.826812000 |
| 6 | -1.029095000 | 6.472237000  | 0.372779000  | 1 | -3.850745000 | 5.672011000  | -3.624998000 |
| 7 | 0.068238000  | 7.147863000  | -0.105024000 | 1 | -4.730880000 | 4.112905000  | -7.527735000 |
| 1 | -1.225231000 | 5.456106000  | 0.052829000  | 8 | 2.061836000  | 5.928032000  | -1.697390000 |
| 1 | 0.763329000  | 6.767408000  | -0.763960000 | 8 | 3.567014000  | 7.476900000  | -1.092238000 |
| 6 | -1.037667000 | 8.521662000  | 1.315679000  | 6 | 3.197249000  | 6.298299000  | -1.190954000 |
| 6 | 0.094887000  | 8.404720000  | 0.455729000  | 6 | 4.077875000  | 5.168938000  | -0.627248000 |
| 6 | -1.240647000 | 9.733136000  | 2.004818000  | 1 | 3.628993000  | 4.869708000  | 0.332471000  |
| 6 | 1.016329000  | 9.446598000  | 0.280934000  | 1 | 4.002961000  | 4.290996000  | -1.280925000 |
| 6 | -0.332774000 | 10.772174000 | 1.829394000  | 6 | 5.540926000  | 5.561343000  | -0.409396000 |
| 6 | 0.786549000  | 10.628986000 | 0.978570000  | 1 | 5.570790000  | 6.505960000  | 0.140173000  |
| 1 | -2.094797000 | 9.857737000  | 2.667096000  | 1 | 6.019008000  | 5.771025000  | -1.376429000 |
| 1 | -0.481645000 | 11.710607000 | 2.357788000  | 6 | 6.345599000  | 4.519000000  | 0.387899000  |
| 1 | 1.480784000  | 11.458111000 | 0.867880000  | 1 | 5.931462000  | 4.420795000  | 1.395889000  |
| 1 | 1.879569000  | 9.309531000  | -0.364589000 | 1 | 7.382321000  | 4.864712000  | 0.504467000  |
| 6 | -4.134049000 | 5.988475000  | 4.005850000  | 6 | 6.396428000  | 3.111035000  | -0.193592000 |
| 8 | -4.747642000 | 4.985938000  | 3.604057000  | 8 | 6.280343000  | 2.103560000  | 0.533111000  |
| 7 | -4.654643000 | 6.860050000  | 4.893664000  | 7 | 6.599232000  | 3.013767000  | -1.522436000 |
| 1 | -4.085156000 | 7.643764000  | 5.185296000  | 1 | 6.680747000  | 3.869718000  | -2.056366000 |
| 6 | -6.030189000 | 6.792779000  | 5.390878000  | 6 | 6.711521000  | 1.758083000  | -2.254803000 |
| 1 | -6.403308000 | 7.819819000  | 5.453556000  | 1 | 5.846603000  | 1.636021000  | -2.916463000 |
| 1 | -6.620307000 | 6.275674000  | 4.630597000  | 1 | 6.688349000  | 0.956029000  | -1.515447000 |
| 6 | -6.177519000 | 6.116527000  | 6.764782000  | 6 | 8.007037000  | 1.678190000  | -3.087512000 |
| 1 | -5.579744000 | 6.673001000  | 7.497240000  | 1 | 8.021062000  | 0.691674000  | -3.565847000 |
| 1 | -7.226202000 | 6.224993000  | 7.074425000  | 1 | 8.867421000  | 1.725749000  | -2.409923000 |
| 6 | -5.772283000 | 4.634754000  | 6.817187000  | 6 | 8.111323000  | 2.764299000  | -4.139658000 |
| 1 | -5.803387000 | 4.298856000  | 7.861436000  | 6 | 7.430868000  | 2.643215000  | -5.362419000 |
| 1 | -4.734396000 | 4.515899000  | 6.483565000  | 6 | 8.857816000  | 3.928203000  | -3.903288000 |
| 6 | -6.683239000 | 3.721283000  | 5.982041000  | 6 | 7.496786000  | 3.657089000  | -6.319359000 |
| 1 | -7.723607000 | 3.826330000  | 6.308500000  | 6 | 8.923690000  | 4.946357000  | -4.859311000 |
| 1 | -6.649319000 | 3.994060000  | 4.925995000  | 6 | 8.242691000  | 4.813436000  | -6.070693000 |
| 7 | -6.341162000 | 2.303877000  | 6.098719000  | 1 | 6.848615000  | 1.746870000  | -5.563207000 |
| 1 | -6.615877000 | 1.842228000  | 6.955314000  | 1 | 9.400610000  | 4.033494000  | -2.966420000 |
| 6 | -5.500670000 | 1.614195000  | 5.297318000  | 1 | 6.967819000  | 3.543414000  | -7.262079000 |
| 7 | -4.906828000 | 2.180070000  | 4.246719000  | 1 | 9.510501000  | 5.838675000  | -4.657554000 |
| 1 | -4.878859000 | 3.189937000  | 4.108502000  | 1 | 8.294665000  | 5.601518000  | -6.817046000 |
| 1 | -4.309122000 | 1.590046000  | 3.647942000  | 7 | 1.242715000  | 3.512836000  | -2.221008000 |
| 7 | -5.288470000 | 0.317023000  | 5.548426000  | 1 | 0.831649000  | 3.129034000  | -1.351407000 |
| 1 | -5.821838000 | -0.156429000 | 6.262519000  | 1 | 1.955666000  | 2.866534000  | -2.564340000 |
| 1 | -4.578583000 | -0.219303000 | 5.011960000  | 1 | 1.692264000  | 4.488838000  | -1.975377000 |
| 6 | -7.300650000 | 5.564083000  | -0.766101000 | 6 | 0.083198000  | 3.667192000  | -3.163967000 |
| 1 | -7.396791000 | 6.439610000  | -0.115374000 | 1 | 0.111111000  | 4.692487000  | -3.543627000 |
| 1 | -8.160268000 | 4.909713000  | -0.576113000 | 6 | -1.203821000 | 3.478111000  | -2.320643000 |
| 1 | -7.366595000 | 5.909873000  | -1.804833000 | 8 | -2.314328000 | 3.609053000  | -2.907967000 |
| 6 | -5.978177000 | 4.835928000  | -0.510895000 | 8 | -1.038023000 | 3.187886000  | -1.107793000 |
| 1 | -5.911063000 | 4.530331000  | 0.541760000  | 6 | 0.143177000  | 2.687730000  | -4.358637000 |
| 1 | -5.134914000 | 5.514572000  | -0.691019000 | 1 | -0.679197000 | 2.966071000  | -5.024394000 |
| 6 | -5.813782000 | 3.607251000  | -1.419433000 | 1 | 1.066547000  | 2.882409000  | -4.918573000 |
| 1 | -6.651174000 | 2.909746000  | -1.292270000 | 6 | 0.045576000  | 1.230205000  | -3.997221000 |
| 1 | -5.833602000 | 3.918330000  | -2.468204000 | 6 | -1.112526000 | 0.497542000  | -3.876824000 |
| 7 | -4.550226000 | 2.900229000  | -1.221669000 | 1 | -2.137887000 | 0.804562000  | -4.025897000 |
| 1 | -3.749863000 | 3.177381000  | -1.809847000 | 7 | -0.811700000 | -0.801522000 | -3.515145000 |
| 6 | -4.302638000 | 2.012819000  | -0.254063000 | 1 | -1.489510000 | -1.537059000 | -3.369958000 |





|    |              |              |              |   |              |              |              |
|----|--------------|--------------|--------------|---|--------------|--------------|--------------|
| 1  | 1.121315000  | -9.257103000 | -4.833607000 | 1 | -4.019108000 | 6.282490000  | 1.054449000  |
| 1  | -3.052620000 | -6.132480000 | -3.901293000 | 6 | -2.279723000 | 7.529457000  | 1.039272000  |
| 1  | -3.753462000 | -4.425651000 | -1.885945000 | 6 | -1.444859000 | 6.752245000  | 0.262741000  |
| 6  | -1.911656000 | -2.677886000 | 2.849249000  | 7 | -0.325564000 | 7.461642000  | -0.100153000 |
| 6  | -2.095334000 | -1.265461000 | 2.261192000  | 1 | -1.566337000 | 5.725446000  | -0.059206000 |
| 6  | -3.254345000 | -0.486993000 | 2.898432000  | 1 | 0.450576000  | 7.100795000  | -0.673766000 |
| 8  | -3.567456000 | 0.644094000  | 2.346983000  | 6 | -1.627761000 | 8.808807000  | 1.171439000  |
| 8  | -3.823565000 | -0.947877000 | 3.908230000  | 6 | -0.402395000 | 8.722476000  | 0.445209000  |
| 1  | -1.800071000 | -2.579280000 | 3.933612000  | 6 | -1.943784000 | 10.018504000 | 1.820039000  |
| 1  | -2.838595000 | -3.244436000 | 2.694977000  | 6 | 0.501891000  | 9.790675000  | 0.365878000  |
| 1  | -1.177372000 | -0.677782000 | 2.401832000  | 6 | -1.053773000 | 11.084255000 | 1.737225000  |
| 1  | -2.261730000 | -1.302349000 | 1.177482000  | 6 | 0.159521000  | 10.969861000 | 1.021439000  |
| 16 | -0.002270000 | -7.976707000 | 0.723297000  | 1 | -2.870490000 | 10.121625000 | 2.380623000  |
| 1  | -0.722118000 | -8.543193000 | -0.271312000 | 1 | -1.290036000 | 12.021220000 | 2.235502000  |
| 8  | 1.779498000  | -4.830425000 | -1.532432000 | 1 | 0.836946000  | 11.819115000 | 0.982228000  |
| 7  | 2.856523000  | 1.444473000  | 1.611632000  | 1 | 1.436994000  | 9.676506000  | -0.176115000 |
| 1  | 3.789034000  | 1.595167000  | 1.241107000  | 6 | -4.844215000 | 6.148950000  | 3.587181000  |
| 1  | 2.330714000  | 2.290288000  | 1.811852000  | 8 | -5.353306000 | 5.089366000  | 3.185726000  |
| 6  | 2.564092000  | 0.361920000  | 2.382529000  | 7 | -5.492681000 | 7.021836000  | 4.384099000  |
| 8  | 1.509932000  | 0.277009000  | 3.021646000  | 1 | -4.996579000 | 7.848505000  | 4.690221000  |
| 6  | 3.583066000  | -0.777234000 | 2.383525000  | 6 | -6.886859000 | 6.871502000  | 4.798119000  |
| 1  | 3.311704000  | -1.435038000 | 3.211880000  | 1 | -7.332367000 | 7.871131000  | 4.809615000  |
| 1  | 3.467705000  | -1.347080000 | 1.452969000  | 1 | -7.395223000 | 6.295707000  | 4.021045000  |
| 6  | 5.057092000  | -0.347310000 | 2.514658000  | 6 | -7.062063000 | 6.223510000  | 6.180614000  |
| 1  | 5.388194000  | 0.224430000  | 1.643723000  | 1 | -6.525150000 | 6.828292000  | 6.921932000  |
| 1  | 5.670348000  | -1.256325000 | 2.543805000  | 1 | -8.127297000 | 6.287903000  | 6.443124000  |
| 6  | 5.339305000  | 0.407121000  | 3.812048000  | 6 | -6.592259000 | 4.764453000  | 6.298030000  |
| 8  | 5.075122000  | -0.072077000 | 4.916552000  | 1 | -6.667988000 | 4.457104000  | 7.348753000  |
| 7  | 5.927301000  | 1.629849000  | 3.670560000  | 1 | -5.532985000 | 4.683793000  | 6.026357000  |
| 1  | 6.041138000  | 2.023122000  | 2.737197000  | 6 | -7.414433000 | 3.787411000  | 5.442742000  |
| 6  | 6.330688000  | 2.396183000  | 4.833520000  | 1 | -8.476976000 | 3.865208000  | 5.696931000  |
| 1  | 6.760801000  | 1.728521000  | 5.582856000  | 1 | -7.320406000 | 4.021659000  | 4.380832000  |
| 1  | 7.102928000  | 3.110381000  | 4.527659000  | 7 | -7.033521000 | 2.387756000  | 5.236697000  |
| 6  | 5.214528000  | 3.176822000  | 5.548537000  | 1 | -7.362274000 | 1.941742000  | 6.482431000  |
| 8  | 5.262138000  | 3.375079000  | 6.763759000  | 6 | -6.112002000 | 1.706331000  | 4.925749000  |
| 7  | 4.236163000  | 3.669059000  | 4.750744000  | 7 | -5.461551000 | 2.261691000  | 3.898846000  |
| 1  | 4.190009000  | 3.396571000  | 3.774521000  | 1 | -5.455404000 | 3.267643000  | 3.732592000  |
| 6  | 3.031615000  | 4.281867000  | 5.280974000  | 1 | -4.788937000 | 1.686262000  | 3.372294000  |
| 1  | 2.685101000  | 3.683672000  | 6.133304000  | 7 | -5.857636000 | 0.429191000  | 5.234438000  |
| 6  | 3.246213000  | 5.727836000  | 5.819687000  | 1 | -6.433080000 | -0.059029000 | 5.904771000  |
| 1  | 3.996703000  | 5.639419000  | 6.610359000  | 1 | -5.117704000 | -0.096388000 | 4.729446000  |
| 1  | 2.314073000  | 6.046831000  | 6.301782000  | 6 | -7.629056000 | 5.377174000  | -1.385331000 |
| 6  | 3.674136000  | 6.754138000  | 4.795702000  | 1 | -7.922195000 | 6.224941000  | -0.757115000 |
| 6  | 5.034180000  | 7.004955000  | 4.562494000  | 1 | -8.411582000 | 4.612914000  | -1.302996000 |
| 6  | 2.721747000  | 7.485252000  | 4.068166000  | 1 | -7.607473000 | 5.723151000  | -2.425945000 |
| 6  | 5.435423000  | 7.959611000  | 3.624665000  | 6 | -6.264666000 | 4.826105000  | -0.959460000 |
| 6  | 3.119350000  | 8.437269000  | 3.126970000  | 1 | -6.291512000 | 4.522193000  | 0.095486000  |
| 6  | 4.478058000  | 8.678379000  | 2.904124000  | 1 | -5.501684000 | 5.611024000  | -1.034990000 |
| 1  | 5.781958000  | 6.457954000  | 5.131498000  | 6 | -5.826165000 | 3.639730000  | -1.832097000 |
| 1  | 1.662012000  | 7.310964000  | 4.243548000  | 1 | -6.571397000 | 2.835407000  | -1.804431000 |
| 1  | 6.494017000  | 8.147003000  | 3.463618000  | 1 | -5.756708000 | 3.958083000  | -2.876816000 |
| 1  | 2.369645000  | 8.993782000  | 2.570913000  | 7 | -4.515324000 | 3.101579000  | -1.473639000 |
| 1  | 4.786472000  | 9.422315000  | 2.174670000  | 1 | -3.693311000 | 3.496507000  | -1.955502000 |
| 6  | 1.970232000  | 4.201845000  | 4.172271000  | 6 | -4.287592000 | 2.186764000  | -0.526732000 |
| 8  | 2.283214000  | 3.945179000  | 3.003267000  | 7 | -3.037975000 | 1.773244000  | -0.279237000 |
| 7  | 0.693807000  | 4.396671000  | 4.564979000  | 1 | -5.027057000 | 1.071560000  | 0.983062000  |
| 1  | 0.503703000  | 4.756973000  | 5.491342000  | 1 | -6.214624000 | 2.009566000  | 0.151913000  |
| 6  | -0.421092000 | 4.328500000  | 3.639463000  | 7 | -5.297259000 | 1.590695000  | 0.148515000  |
| 1  | -0.015704000 | 4.468407000  | 2.631689000  | 1 | -2.912487000 | 1.239279000  | 0.581741000  |
| 6  | -1.065634000 | 2.916329000  | 3.665158000  | 1 | -2.256443000 | 2.362083000  | -0.597831000 |
| 1  | -0.243654000 | 2.203765000  | 3.509436000  | 6 | -8.712634000 | 6.890995000  | -6.353892000 |
| 8  | -1.954795000 | 2.867291000  | 2.546913000  | 1 | -8.825280000 | 5.962240000  | -6.925208000 |
| 1  | -2.464025000 | 2.024225000  | 2.570355000  | 1 | -9.566574000 | 7.538571000  | -6.586172000 |
| 6  | -1.772720000 | 2.588088000  | 4.981438000  | 1 | -8.759975000 | 6.635133000  | -5.288799000 |
| 1  | -1.073121000 | 2.640717000  | 5.822849000  | 6 | -7.381874000 | 7.587513000  | -6.692720000 |
| 1  | -2.176469000 | 1.570183000  | 4.952032000  | 6 | -6.171487000 | 6.729807000  | -6.386522000 |
| 1  | -2.602748000 | 3.278788000  | 5.167330000  | 6 | -5.542102000 | 6.779633000  | -5.135288000 |
| 6  | -1.374960000 | 5.510299000  | 3.911064000  | 6 | -5.662888000 | 5.825420000  | -7.331649000 |
| 8  | -1.061760000 | 6.422984000  | 4.680383000  | 6 | -4.454673000 | 5.959528000  | -4.826545000 |
| 7  | -2.528600000 | 5.466983000  | 3.203989000  | 6 | -4.580261000 | 4.996934000  | -7.042583000 |
| 1  | -2.705262000 | 4.617183000  | 2.667600000  | 6 | -3.969032000 | 5.053455000  | -5.782042000 |
| 6  | -3.452224000 | 6.579733000  | 3.115363000  | 8 | -2.913911000 | 4.228625000  | -5.539793000 |
| 1  | -3.051569000 | 7.371830000  | 3.751931000  | 1 | -2.636593000 | 4.292271000  | -4.587036000 |
| 6  | -3.577565000 | 7.093533000  | 1.645928000  | 1 | -7.317997000 | 8.528347000  | -6.131083000 |
| 1  | -4.305373000 | 7.915893000  | 1.643499000  | 1 | -7.382005000 | 7.858957000  | -7.756323000 |



|   |              |              |              |   |              |              |              |
|---|--------------|--------------|--------------|---|--------------|--------------|--------------|
| 1 | 6.002317000  | 6.486775000  | 5.534309000  | 6 | -5.815713000 | 4.238480000  | -1.962672000 |
| 1 | 1.948809000  | 7.394781000  | 4.421692000  | 1 | -6.684419000 | 3.592485000  | -1.784571000 |
| 1 | 6.831623000  | 7.995630000  | 3.753256000  | 1 | -5.766153000 | 4.390345000  | -3.045285000 |
| 1 | 2.774509000  | 8.896480000  | 2.634474000  | 7 | -4.594951000 | 3.530450000  | -1.584754000 |
| 1 | 5.218133000  | 9.207291000  | 2.293669000  | 1 | -3.746363000 | 3.688012000  | -2.157637000 |
| 6 | 2.216434000  | 4.262577000  | 4.605514000  | 6 | -4.458946000 | 2.750238000  | -0.507675000 |
| 8 | 2.606503000  | 3.891978000  | 3.491789000  | 7 | -3.283281000 | 2.178073000  | -0.235790000 |
| 7 | 0.921088000  | 4.532796000  | 4.873110000  | 1 | -5.291304000 | 1.987270000  | 1.168712000  |
| 1 | 0.674631000  | 5.012988000  | 5.730404000  | 1 | -6.338553000 | 3.025660000  | 0.277111000  |
| 6 | -0.097947000 | 4.494139000  | 3.841005000  | 7 | -5.511683000 | 2.449007000  | 0.290614000  |
| 1 | 0.405932000  | 4.606743000  | 2.874771000  | 1 | -3.192829000 | 1.761521000  | 0.693385000  |
| 6 | -0.808122000 | 3.113599000  | 3.808357000  | 1 | -2.431404000 | 2.514910000  | -0.713690000 |
| 1 | -0.010028000 | 2.360576000  | 3.740186000  | 6 | -7.826005000 | -1.151923000 | -3.886395000 |
| 8 | -1.579489000 | 3.095113000  | 2.603854000  | 1 | -7.512463000 | -2.098416000 | -4.341834000 |
| 1 | -2.277122000 | 2.401407000  | 2.658151000  | 1 | -8.881226000 | -1.244598000 | -3.602611000 |
| 6 | -1.648845000 | 2.832552000  | 5.053202000  | 1 | -7.238881000 | -1.011476000 | -2.971229000 |
| 1 | -1.027437000 | 2.880278000  | 5.953805000  | 6 | -7.616470000 | 0.023328000  | -4.858932000 |
| 1 | -2.081824000 | 1.827827000  | 5.003454000  | 6 | -6.171731000 | 0.197959000  | -5.280987000 |
| 1 | -2.468702000 | 3.552773000  | 5.150725000  | 6 | -5.291204000 | 0.999804000  | -4.542251000 |
| 6 | -1.021450000 | 5.716128000  | 4.018771000  | 6 | -5.657119000 | -0.462364000 | -6.407169000 |
| 8 | -0.759467000 | 6.605972000  | 4.834341000  | 6 | -3.949051000 | 1.142176000  | -4.899349000 |
| 7 | -2.079459000 | 5.738868000  | 3.177441000  | 6 | -4.318973000 | -0.338406000 | -6.778088000 |
| 1 | -2.225887000 | 4.900125000  | 2.614817000  | 6 | -3.456105000 | 0.463530000  | -6.020369000 |
| 6 | -2.921205000 | 6.904664000  | 2.983013000  | 8 | -2.155206000 | 0.555803000  | -6.430871000 |
| 1 | -2.431543000 | 7.732129000  | 3.501964000  | 1 | -1.634613000 | 1.053172000  | -5.773780000 |
| 6 | -3.051053000 | 7.232523000  | 1.466700000  | 1 | -7.973865000 | 0.946557000  | -4.384515000 |
| 1 | -3.734435000 | 8.087020000  | 1.369680000  | 1 | -8.242503000 | -0.132467000 | -5.747010000 |
| 1 | -3.546051000 | 6.381392000  | 0.984345000  | 1 | -5.658277000 | 1.531454000  | -3.666760000 |
| 6 | -1.740214000 | 7.523131000  | 0.798649000  | 1 | -6.316085000 | -1.085302000 | -7.008818000 |
| 6 | -0.999316000 | 6.655382000  | 0.022194000  | 1 | -3.295996000 | 1.793081000  | -4.321815000 |
| 7 | 0.165735000  | 7.256587000  | -0.394392000 | 1 | -3.929211000 | -0.852982000 | -7.651630000 |
| 1 | -1.215466000 | 5.633340000  | -0.263850000 | 8 | 2.285377000  | 6.081334000  | -1.914388000 |
| 1 | 0.887218000  | 6.832493000  | -0.993570000 | 8 | 3.825743000  | 7.532201000  | -1.174244000 |
| 6 | -0.977892000 | 8.745127000  | 0.871381000  | 6 | 3.360206000  | 6.385914000  | -1.256693000 |
| 6 | 0.212190000  | 8.535335000  | 0.113878000  | 6 | 4.039698000  | 5.225515000  | -0.502326000 |
| 6 | -1.171391000 | 9.993634000  | 1.494302000  | 1 | 3.266873000  | 4.753291000  | 0.120658000  |
| 6 | 1.201098000  | 9.519621000  | -0.021620000 | 1 | 4.346686000  | 4.457153000  | 1.225921000  |
| 6 | -0.197249000 | 10.976680000 | 1.356744000  | 6 | 5.211470000  | 5.671449000  | 0.378349000  |
| 6 | 0.979495000  | 10.739930000 | 0.610431000  | 1 | 4.919476000  | 6.592083000  | 0.891267000  |
| 1 | -2.069200000 | 10.190269000 | 2.076398000  | 1 | 6.067889000  | 5.960979000  | -0.246170000 |
| 1 | -0.337993000 | 11.943126000 | 1.834390000  | 6 | 5.615898000  | 4.658005000  | 1.460630000  |
| 1 | 1.724723000  | 11.527030000 | 0.527862000  | 1 | 4.739070000  | 4.386955000  | 2.057288000  |
| 1 | 2.107093000  | 9.312786000  | -0.585517000 | 1 | 6.316280000  | 5.140986000  | 2.157864000  |
| 6 | -4.318870000 | 6.659043000  | 3.567874000  | 6 | 6.284725000  | 3.352779000  | 1.051448000  |
| 8 | -4.986912000 | 5.670089000  | 3.224856000  | 8 | 6.148133000  | 2.323017000  | 1.743835000  |
| 7 | -4.778755000 | 7.597588000  | 4.420370000  | 7 | 7.083331000  | 3.378114000  | -0.034988000 |
| 1 | -4.160789000 | 8.357002000  | 4.674859000  | 1 | 7.166794000  | 4.250483000  | -0.540135000 |
| 6 | -6.127511000 | 7.596484000  | 4.985314000  | 6 | 7.950761000  | 2.276029000  | -0.440471000 |
| 1 | -6.476094000 | 8.633971000  | 5.003782000  | 1 | 7.825904000  | 1.492630000  | 0.307810000  |
| 1 | -6.765841000 | 7.047965000  | 4.288859000  | 1 | 8.992122000  | 2.618294000  | -0.395474000 |
| 6 | -6.210451000 | 7.009625000  | 6.405084000  | 6 | 7.661399000  | 1.742698000  | -1.853503000 |
| 1 | -5.537972000 | 7.578937000  | 7.058637000  | 1 | 8.455938000  | 1.018715000  | -2.083691000 |
| 1 | -7.228031000 | 7.188682000  | 6.779189000  | 1 | 7.775058000  | 2.558318000  | -2.578491000 |
| 6 | -5.871740000 | 5.515186000  | 6.526518000  | 6 | 6.305505000  | 1.087997000  | -2.033758000 |
| 1 | -5.814322000 | 5.252243000  | 7.590174000  | 6 | 5.908521000  | 0.009390000  | -1.227500000 |
| 1 | -4.879004000 | 5.318595000  | 6.104283000  | 6 | 5.434176000  | 1.515988000  | -3.043875000 |
| 6 | -6.908387000 | 4.600665000  | 5.854579000  | 6 | 4.675317000  | -0.614595000 | -1.419899000 |
| 1 | -7.900214000 | 4.778214000  | 6.282974000  | 6 | 4.203123000  | 0.884579000  | -3.250198000 |
| 1 | -6.983256000 | 4.807930000  | 4.784673000  | 6 | 3.815256000  | -0.180713000 | -2.433794000 |
| 7 | -6.625444000 | 3.174133000  | 6.021591000  | 1 | 6.572140000  | -0.354480000 | -0.446289000 |
| 1 | -6.863211000 | 2.763598000  | 6.914407000  | 1 | 5.730253000  | 2.337353000  | -3.692755000 |
| 6 | -5.845913000 | 2.430602000  | 5.208564000  | 1 | 4.387888000  | -1.450905000 | -0.787858000 |
| 7 | -5.301427000 | 2.942054000  | 4.105517000  | 1 | 3.566388000  | 1.211421000  | -4.068445000 |
| 1 | -5.256275000 | 3.945112000  | 3.926334000  | 1 | 2.863165000  | -0.681545000 | -2.586222000 |
| 1 | -4.710918000 | 2.328607000  | 3.518848000  | 7 | 1.280291000  | 3.761357000  | -2.551238000 |
| 7 | -5.630258000 | 1.140372000  | 5.505988000  | 1 | 0.876164000  | 3.311060000  | -1.709827000 |
| 1 | -6.199645000 | 0.684883000  | 6.204734000  | 1 | 1.913663000  | 3.095634000  | -3.001824000 |
| 1 | -5.068561000 | 0.544100000  | 4.870019000  | 1 | 1.816745000  | 4.664053000  | -2.245019000 |
| 6 | -7.266921000 | 6.311813000  | -1.695038000 | 6 | 0.093931000  | 4.098605000  | -3.408971000 |
| 1 | -7.368200000 | 7.275633000  | -1.185149000 | 1 | 0.079413000  | 5.187240000  | -3.510502000 |
| 1 | -8.159157000 | 5.716281000  | -1.465996000 | 6 | -1.190826000 | 3.696519000  | -2.630646000 |
| 1 | -7.261726000 | 6.503676000  | -2.774733000 | 8 | -2.283723000 | 3.926680000  | -3.198694000 |
| 6 | -5.988628000 | 5.591889000  | -1.254711000 | 8 | -0.999656000 | 3.188673000  | -1.485351000 |
| 1 | -5.998768000 | 5.440636000  | -0.166789000 | 6 | 0.173291000  | 3.484927000  | -4.816025000 |
| 1 | -5.110907000 | 6.212818000  | -1.472627000 | 1 | -0.774585000 | 3.740400000  | -5.305000000 |

|                                            |              |              |              |   |              |              |              |
|--------------------------------------------|--------------|--------------|--------------|---|--------------|--------------|--------------|
| 1                                          | 0.957286000  | 4.004706000  | -5.380066000 | 1 | 3.640704000  | -1.422800000 | 4.195068000  |
| 6                                          | 0.445562000  | 2.002667000  | -4.870606000 | 1 | 3.905545000  | -1.522643000 | 2.453650000  |
| 6                                          | 0.137852000  | 1.020555000  | -3.945954000 | 6 | 5.436704000  | -0.420165000 | 3.510834000  |
| 1                                          | -0.357178000 | 1.102833000  | -2.988046000 | 1 | 5.825059000  | 0.092078000  | 2.626386000  |
| 7                                          | 0.609933000  | -0.203730000 | -4.372776000 | 1 | 6.043834000  | -1.324466000 | 3.641157000  |
| 1                                          | 0.595683000  | -1.067840000 | -3.799230000 | 6 | 5.636551000  | 0.418037000  | 4.772422000  |
| 6                                          | 1.243578000  | -0.047640000 | -5.570343000 | 8 | 5.286611000  | 0.014427000  | 5.883049000  |
| 6                                          | 1.171697000  | -1.332092000 | -5.932677000 | 7 | 6.250511000  | 1.623061000  | 4.595243000  |
| 6                                          | 1.743643000  | 1.769501000  | -7.121857000 | 1 | 6.440252000  | 1.948740000  | 3.648786000  |
| 6                                          | 2.533651000  | 0.834015000  | -7.927043000 | 6 | 6.582993000  | 2.459733000  | 5.732774000  |
| 6                                          | 1.860028000  | -1.020002000 | -6.406665000 | 1 | 6.938748000  | 1.835468000  | 6.554875000  |
| 6                                          | 2.451461000  | -0.603068000 | -7.561172000 | 1 | 7.394102000  | 3.135652000  | 5.441101000  |
| 1                                          | 1.671799000  | 2.803090000  | -7.444994000 | 6 | 5.438844000  | 3.313814000  | 6.308270000  |
| 1                                          | 2.495996000  | 1.008520000  | -9.004749000 | 8 | 5.419959000  | 3.617716000  | 7.502320000  |
| 1                                          | 1.831445000  | -2.073105000 | -6.142298000 | 7 | 4.521050000  | 3.746147000  | 5.411879000  |
| 1                                          | 2.924009000  | -1.315143000 | -8.229449000 | 1 | 4.532154000  | 3.386873000  | 4.463453000  |
| 7                                          | 4.199703000  | 1.224562000  | -7.740729000 | 6 | 3.306732000  | 4.441225000  | 5.798459000  |
| 8                                          | 4.953017000  | 0.744254000  | -8.578760000 | 1 | 2.881598000  | 3.940345000  | 6.677515000  |
| 8                                          | 4.541201000  | 1.906044000  | -6.785039000 | 6 | 3.538619000  | 5.927866000  | 6.206576000  |
| <b><sup>2</sup>Int4<sub>B,C5,exo</sub></b> |              |              |              | 1 | 4.252451000  | 5.898400000  | 7.034817000  |
| 26                                         | 0.549841000  | -3.866473000 | -2.321732000 | 1 | 2.596383000  | 6.313435000  | 6.614698000  |
| 7                                          | 0.065451000  | -3.479752000 | -0.394096000 | 6 | 4.036815000  | 6.841940000  | 5.109571000  |
| 7                                          | 2.437262000  | -4.346050000 | -1.751791000 | 6 | 5.412034000  | 7.022067000  | 4.899678000  |
| 7                                          | 0.982431000  | -4.454103000 | -4.208605000 | 6 | 3.136085000  | 7.539639000  | 4.289139000  |
| 7                                          | -1.369877000 | -3.530441000 | -2.864135000 | 6 | 5.877670000  | 7.872114000  | 3.893736000  |
| 6                                          | -1.141027000 | -3.028897000 | 0.077982000  | 6 | 3.597961000  | 8.388052000  | 3.279986000  |
| 6                                          | -1.050812000 | -2.732917000 | 1.503472000  | 6 | 4.970954000  | 8.556939000  | 3.079758000  |
| 6                                          | 0.233642000  | -3.021618000 | 1.859368000  | 1 | 6.121381000  | 6.501821000  | 5.538552000  |
| 6                                          | 0.921366000  | -3.480539000 | 0.675559000  | 1 | 2.065546000  | 7.422916000  | 4.445115000  |
| 6                                          | 2.957247000  | -4.251642000 | -0.490102000 | 1 | 6.947054000  | 8.006062000  | 3.751868000  |
| 6                                          | 4.352250000  | -4.637133000 | -0.497504000 | 1 | 2.887573000  | 8.920062000  | 2.652557000  |
| 6                                          | 4.661344000  | -4.962673000 | -1.783178000 | 1 | 5.330517000  | 9.221874000  | 2.299128000  |
| 6                                          | 3.455849000  | -4.778010000 | -2.560401000 | 6 | 2.323640000  | 4.291752000  | 4.627265000  |
| 6                                          | 2.200571000  | -4.867499000 | -4.682864000 | 8 | 2.708310000  | 3.917855000  | 3.512709000  |
| 6                                          | 2.117397000  | -5.122230000 | -6.102211000 | 7 | 1.030203000  | 4.567943000  | 4.897579000  |
| 6                                          | 0.833955000  | -4.852978000 | -6.475621000 | 1 | 0.786704000  | 5.051131000  | 5.754030000  |
| 6                                          | 0.132719000  | -4.432829000 | -5.284937000 | 6 | 0.010020000  | 4.528538000  | 3.866538000  |
| 6                                          | -1.895074000 | -3.634261000 | -4.126205000 | 1 | 0.513453000  | 4.637899000  | 2.899744000  |
| 6                                          | -3.290746000 | -3.256065000 | -4.113660000 | 6 | -0.701919000 | 3.148903000  | 3.837495000  |
| 6                                          | -3.596075000 | -2.928926000 | -2.827794000 | 1 | 0.094740000  | 2.394415000  | 3.770109000  |
| 6                                          | -2.386250000 | -3.104224000 | -2.054633000 | 8 | -1.474129000 | 3.129289000  | 2.633597000  |
| 6                                          | -2.289769000 | -2.870776000 | -0.686150000 | 1 | -2.166076000 | 2.429777000  | 2.685958000  |
| 6                                          | 2.260190000  | -3.850996000 | 0.645061000  | 6 | -1.542009000 | 2.871460000  | 5.083600000  |
| 6                                          | 3.356254000  | -5.022429000 | -3.923913000 | 1 | -0.919806000 | 2.920371000  | 5.983619000  |
| 6                                          | -1.205064000 | -4.052769000 | -5.256336000 | 1 | -1.976072000 | 1.867089000  | 5.036228000  |
| 1                                          | -3.189616000 | -2.533472000 | -0.182616000 | 1 | -2.361025000 | 3.592720000  | 5.180338000  |
| 1                                          | 2.806699000  | -3.821450000 | 1.582747000  | 6 | -0.911773000 | 5.751961000  | 4.041003000  |
| 1                                          | 4.249418000  | -5.363612000 | -4.438235000 | 8 | -0.649919000 | 6.643147000  | 4.855149000  |
| 1                                          | -1.753151000 | -4.087202000 | -6.192825000 | 7 | -1.968071000 | 5.773986000  | 3.197525000  |
| 1                                          | 0.694858000  | -2.903092000 | 2.832500000  | 1 | -2.116000000 | 4.933144000  | 2.638361000  |
| 1                                          | 4.991012000  | -4.653100000 | 0.376765000  | 6 | -2.811398000 | 6.938167000  | 3.001541000  |
| 1                                          | 5.608039000  | -5.300013000 | -2.186430000 | 1 | -2.323457000 | 7.766927000  | 3.520060000  |
| 1                                          | 2.941994000  | -5.463031000 | -6.715758000 | 6 | -2.941697000 | 7.264467000  | 1.485046000  |
| 1                                          | 0.387378000  | -4.925262000 | -7.459393000 | 1 | -3.625934000 | 8.118236000  | 1.387367000  |
| 1                                          | -3.932264000 | -3.239362000 | -4.985447000 | 1 | -3.435925000 | 6.412411000  | 1.003522000  |
| 1                                          | -4.543012000 | -2.594538000 | -2.422679000 | 6 | -1.631377000 | 7.555435000  | 0.816222000  |
| 6                                          | -2.134456000 | -2.124563000 | 2.349101000  | 6 | -0.892625000 | 6.688874000  | 0.036513000  |
| 6                                          | -2.266186000 | -0.615898000 | 2.077965000  | 7 | 0.272330000  | 7.290002000  | -0.380484000 |
| 6                                          | -3.340382000 | 0.116242000  | 2.880932000  | 1 | -1.110115000 | 5.667646000  | -0.251421000 |
| 8                                          | -3.569445000 | 1.336784000  | 2.501925000  | 1 | 0.991726000  | 6.867317000  | -0.982893000 |
| 8                                          | -3.909798000 | -0.437597000 | 3.840110000  | 6 | -0.867816000 | 8.776616000  | 0.890603000  |
| 1                                          | -1.908717000 | -2.282801000 | 3.408427000  | 6 | 0.320837000  | 8.567477000  | 0.130709000  |
| 1                                          | -3.099565000 | -2.611638000 | 2.161952000  | 6 | -1.058971000 | 10.023807000 | 1.516881000  |
| 1                                          | -1.308323000 | -0.120110000 | 2.289165000  | 6 | 1.310686000  | 9.550925000  | -0.003828000 |
| 1                                          | -2.458023000 | -0.438324000 | 1.013386000  | 6 | -0.083940000 | 11.006110000 | 1.380235000  |
| 16                                         | -0.074052000 | -6.257545000 | -1.946868000 | 6 | 1.091433000  | 10.769910000 | 0.631585000  |
| 1                                          | -0.771713000 | -6.113189000 | -0.797531000 | 1 | -1.955654000 | 10.220036000 | 2.100838000  |
| 8                                          | 0.966639000  | -2.290448000 | -2.616388000 | 1 | -0.222904000 | 11.971548000 | 1.860429000  |
| 7                                          | 3.344434000  | 1.326157000  | 2.367831000  | 1 | 1.837420000  | 11.556375000 | 0.549866000  |
| 1                                          | 4.315878000  | 1.489617000  | 2.119517000  | 1 | 2.215658000  | 9.344466000  | -0.569519000 |
| 1                                          | 2.771708000  | 2.161746000  | 2.429624000  | 6 | -4.208599000 | 6.689902000  | 3.586310000  |
| 6                                          | 2.954344000  | 0.270886000  | 3.128304000  | 8 | -4.874074000 | 5.698753000  | 3.244686000  |
| 8                                          | 1.819844000  | 0.187776000  | 3.610232000  | 7 | -4.670806000 | 7.628629000  | 4.437192000  |
| 6                                          | 3.971871000  | -0.854996000 | 3.322503000  | 1 | -4.054683000 | 8.389849000  | 4.690732000  |
|                                            |              |              |              | 6 | -6.018661000 | 7.623729000  | 5.003927000  |





|    |              |              |              |   |              |              |              |
|----|--------------|--------------|--------------|---|--------------|--------------|--------------|
| 1  | -2.953836000 | -3.750875000 | 0.346097000  | 6 | -1.215004000 | 5.526421000  | 3.821264000  |
| 1  | 2.909199000  | -4.185632000 | 2.827449000  | 8 | -0.873125000 | 6.549509000  | 4.419755000  |
| 1  | 5.076202000  | -6.601832000 | -2.665105000 | 7 | -2.362287000 | 5.404112000  | 3.114370000  |
| 1  | -0.735100000 | -5.922403000 | -5.218328000 | 1 | -2.592961000 | 4.480446000  | 2.752681000  |
| 1  | 0.635269000  | -3.257676000 | 3.712192000  | 6 | -3.276151000 | 6.505906000  | 2.883780000  |
| 1  | 5.243962000  | -5.077514000 | 2.014033000  | 1 | -2.855378000 | 7.371733000  | 3.399771000  |
| 1  | 6.166871000  | -6.106488000 | -0.321320000 | 6 | -3.421645000 | 6.818247000  | 1.360977000  |
| 1  | 4.043046000  | -7.104075000 | -5.041782000 | 1 | -4.135276000 | 7.648168000  | 1.264319000  |
| 1  | 1.574255000  | -6.804428000 | -6.128819000 | 1 | -3.890899000 | 5.946275000  | 0.889707000  |
| 1  | -3.089993000 | -5.165940000 | -4.354855000 | 6 | -2.130541000 | 7.141298000  | 0.666355000  |
| 1  | -4.038777000 | -4.271341000 | -1.974440000 | 6 | -1.408778000 | 6.286810000  | -0.140304000 |
| 6  | -2.179225000 | -2.818183000 | 2.902792000  | 7 | -0.269702000 | 6.901146000  | -0.604679000 |
| 6  | -2.233028000 | -1.286181000 | 2.720714000  | 1 | -1.624588000 | 5.271865000  | -0.438412000 |
| 6  | -3.382632000 | -0.559148000 | 3.426642000  | 1 | 0.428612000  | 6.472936000  | -1.223308000 |
| 8  | -3.601825000 | 0.654280000  | 3.024532000  | 6 | -1.384817000 | 8.376019000  | 0.704726000  |
| 8  | -4.020379000 | -1.109362000 | 4.344934000  | 6 | -0.222326000 | 8.182935000  | -0.101474000 |
| 1  | -2.145930000 | -3.040583000 | 3.974626000  | 6 | -1.575637000 | 9.626164000  | 1.324566000  |
| 1  | -3.109503000 | -3.260720000 | 2.527542000  | 6 | 0.738657000  | 9.185974000  | -0.286638000 |
| 1  | -1.298630000 | -0.842931000 | 3.094765000  | 6 | -0.629506000 | 10.628309000 | 1.136069000  |
| 1  | -2.276110000 | -1.022423000 | 1.659471000  | 6 | 0.518360000  | 10.408568000 | 0.342207000  |
| 16 | 0.516794000  | -7.287241000 | -0.437379000 | 1 | -2.451738000 | 9.809955000  | 1.942859000  |
| 1  | 1.553234000  | -7.953842000 | -0.994408000 | 1 | -0.770305000 | 11.596298000 | 1.610623000  |
| 8  | 1.621003000  | -3.503101000 | -1.870978000 | 1 | 1.242898000  | 11.209760000 | 0.220212000  |
| 7  | 2.910111000  | 1.173420000  | 2.642152000  | 1 | 1.625453000  | 8.990188000  | -0.883490000 |
| 1  | 3.818756000  | 1.203344000  | 2.193161000  | 6 | -4.652682000 | 6.143488000  | 3.457829000  |
| 1  | 2.355426000  | 2.020486000  | 2.585990000  | 8 | -5.163783000 | 5.036764000  | 3.224472000  |
| 6  | 2.546274000  | 0.219762000  | 3.527871000  | 7 | -5.271769000 | 7.106295000  | 4.171638000  |
| 8  | 1.452855000  | 0.235220000  | 4.109312000  | 1 | -4.773411000 | 7.969785000  | 4.342490000  |
| 6  | 3.544349000  | -0.912073000 | 3.770302000  | 6 | -6.636776000 | 6.994410000  | 4.685426000  |
| 1  | 3.301837000  | -1.333315000 | 4.748919000  | 1 | -7.106067000 | 7.977561000  | 4.579275000  |
| 1  | 3.354372000  | -1.686677000 | 3.018327000  | 1 | -7.172215000 | 6.303481000  | 4.030034000  |
| 6  | 5.033538000  | -0.523381000 | 3.727272000  | 6 | -6.718008000 | 6.551349000  | 6.156702000  |
| 1  | 5.331666000  | -0.169882000 | 2.736396000  | 1 | -6.128896000 | 7.249679000  | 6.763921000  |
| 1  | 5.624796000  | -1.425116000 | 3.929039000  | 1 | -7.761718000 | 6.666405000  | 6.481045000  |
| 6  | 5.397391000  | 0.487163000  | 4.812108000  | 6 | -6.244621000 | 5.117554000  | 6.447208000  |
| 8  | 5.158801000  | 0.275313000  | 6.003126000  | 1 | -6.190514000 | 4.976855000  | 7.534009000  |
| 7  | 6.021563000  | 1.623089000  | 4.388006000  | 1 | -5.228682000 | 4.970267000  | 6.062435000  |
| 1  | 6.088928000  | 1.811876000  | 3.388431000  | 6 | -7.177483000 | 4.044313000  | 5.863949000  |
| 6  | 6.444264000  | 2.628273000  | 5.344677000  | 1 | -8.192870000 | 4.180068000  | 6.250587000  |
| 1  | 6.908456000  | 2.145908000  | 6.207109000  | 1 | -7.239492000 | 4.123946000  | 4.776165000  |
| 1  | 7.192319000  | 3.268913000  | 4.865613000  | 7 | -6.778107000 | 2.675576000  | 6.193802000  |
| 6  | 5.329363000  | 3.529269000  | 5.906548000  | 1 | -7.018675000 | 2.335361000  | 7.114928000  |
| 8  | 5.394466000  | 3.976864000  | 7.052645000  | 6 | -5.947746000 | 1.904491000  | 5.462127000  |
| 7  | 4.332517000  | 3.831207000  | 5.040835000  | 7 | -5.418424000 | 2.336232000  | 4.318643000  |
| 1  | 4.294974000  | 3.374117000  | 4.136661000  | 1 | -5.410935000 | 3.320996000  | 4.056030000  |
| 6  | 3.133684000  | 4.550876000  | 5.431394000  | 1 | -4.775231000 | 1.698290000  | 3.815675000  |
| 1  | 2.760406000  | 4.125516000  | 6.371690000  | 7 | -5.658589000 | 0.662739000  | 5.887006000  |
| 6  | 3.368215000  | 6.069367000  | 5.698803000  | 1 | -6.227805000 | 0.240743000  | 6.606876000  |
| 1  | 4.093417000  | 6.117558000  | 6.515718000  | 1 | -5.081621000 | 0.027820000  | 5.304281000  |
| 1  | 2.427731000  | 6.487183000  | 6.078263000  | 6 | -7.597284000 | 3.810453000  | -2.254316000 |
| 6  | 3.851677000  | 6.875556000  | 4.515406000  | 1 | -8.271264000 | 4.607399000  | -1.922492000 |
| 6  | 5.224003000  | 7.054563000  | 4.288444000  | 1 | -8.063459000 | 2.850856000  | -1.999116000 |
| 6  | 2.940636000  | 7.468266000  | 3.627319000  | 1 | -7.523993000 | 3.868222000  | -3.346816000 |
| 6  | 5.677476000  | 7.802509000  | 3.199429000  | 6 | -6.219369000 | 3.952932000  | -1.602119000 |
| 6  | 3.389975000  | 8.214407000  | 2.535762000  | 1 | -6.317512000 | 3.947397000  | -0.508439000 |
| 6  | 4.760689000  | 8.383776000  | 2.319212000  | 1 | -5.774116000 | 4.919069000  | -1.869443000 |
| 1  | 5.939650000  | 6.614098000  | 4.978460000  | 6 | -5.259746000 | 2.836506000  | -2.041532000 |
| 1  | 1.872178000  | 7.347155000  | 3.795280000  | 1 | -5.675762000 | 1.850235000  | -1.798272000 |
| 1  | 6.744847000  | 7.936639000  | 3.042992000  | 1 | -5.139630000 | 2.863659000  | -3.129015000 |
| 1  | 2.671168000  | 8.665228000  | 1.856988000  | 7 | -3.919059000 | 2.953552000  | -1.473696000 |
| 1  | 5.109719000  | 8.967806000  | 1.471886000  | 1 | -3.211187000 | 3.421474000  | -2.054841000 |
| 6  | 2.091236000  | 4.302789000  | 4.333430000  | 6 | -3.537526000 | 2.476417000  | -0.278268000 |
| 8  | 2.426795000  | 3.943689000  | 3.198060000  | 7 | -2.249916000 | 2.540553000  | 0.073092000  |
| 7  | 0.803380000  | 4.475839000  | 4.699198000  | 1 | -4.095879000 | 1.382131000  | 1.381815000  |
| 1  | 0.596266000  | 4.911560000  | 5.588578000  | 1 | -5.402268000 | 1.889820000  | 0.346282000  |
| 1  | -0.299668000 | 4.283440000  | 3.777260000  | 7 | -4.420019000 | 1.918239000  | 0.568848000  |
| 6  | 0.132843000  | 4.239406000  | 2.772332000  | 1 | -1.980083000 | 2.470298000  | 1.054505000  |
| 6  | -0.979169000 | 2.912237000  | 4.037066000  | 1 | -1.572262000 | 2.936086000  | -0.594009000 |
| 1  | -0.178675000 | 2.161082000  | 4.009030000  | 6 | -8.963627000 | 6.190631000  | -6.275068000 |
| 8  | -1.883241000 | 2.683140000  | 2.947561000  | 1 | -9.117767000 | 5.205323000  | -6.730450000 |
| 1  | -2.417464000 | 1.860719000  | 3.110010000  | 1 | -9.852955000 | 6.800144000  | -6.475612000 |
| 6  | -1.701573000 | 2.828323000  | 5.381407000  | 1 | -8.886982000 | 6.048268000  | -5.190663000 |
| 1  | -1.004799000 | 3.001693000  | 6.208513000  | 6 | -7.695436000 | 6.862725000  | -6.832503000 |
| 1  | -2.131286000 | 1.830082000  | 5.516159000  | 6 | -6.435320000 | 6.060916000  | -6.578240000 |
| 1  | -2.514198000 | 3.560636000  | 5.442368000  | 6 | -5.681877000 | 6.239596000  | -5.409760000 |

|   |              |              |              |
|---|--------------|--------------|--------------|
| 6 | -5.996190000 | 5.086769000  | -7.488170000 |
| 6 | -4.539648000 | 5.480256000  | -5.147280000 |
| 6 | -4.860069000 | 4.317476000  | -7.244375000 |
| 6 | -4.121297000 | 4.505588000  | -6.067053000 |
| 8 | -3.018218000 | 3.734566000  | -5.870762000 |
| 1 | -2.607755000 | 3.928039000  | -4.983161000 |
| 1 | -7.593621000 | 7.859454000  | -6.383968000 |
| 1 | -7.820034000 | 7.018938000  | -7.911881000 |
| 1 | -5.986785000 | 6.995691000  | -4.688516000 |
| 1 | -6.553162000 | 4.928367000  | -8.409835000 |
| 1 | -3.962411000 | 5.643914000  | -4.241555000 |
| 1 | -4.527913000 | 3.568747000  | -7.958174000 |
| 8 | 1.917350000  | 5.709222000  | -2.196353000 |
| 8 | 3.351142000  | 7.201553000  | -1.330747000 |
| 6 | 2.948802000  | 6.038337000  | -1.483629000 |
| 6 | 3.636460000  | 4.885874000  | -0.723210000 |
| 1 | 2.956730000  | 4.618590000  | 0.100094000  |
| 1 | 3.685950000  | 3.996702000  | -1.363737000 |
| 6 | 5.013652000  | 5.237982000  | -0.151579000 |
| 1 | 4.953798000  | 6.244117000  | 0.272317000  |
| 1 | 5.754532000  | 5.310775000  | -0.961123000 |
| 6 | 5.496195000  | 4.291234000  | 0.959587000  |
| 1 | 4.769168000  | 4.287971000  | 1.778560000  |
| 1 | 6.435386000  | 4.672945000  | 1.385289000  |
| 6 | 5.747255000  | 2.828335000  | 0.615405000  |
| 8 | 5.642230000  | 1.938198000  | 1.484434000  |
| 7 | 6.119638000  | 2.534118000  | -0.645397000 |
| 1 | 6.249599000  | 3.295593000  | -1.296520000 |
| 6 | 6.444140000  | 1.180223000  | -1.089013000 |
| 1 | 6.250876000  | 1.134239000  | -2.164814000 |
| 1 | 5.751891000  | 0.495705000  | -0.595054000 |
| 6 | 7.901041000  | 0.766758000  | -0.790677000 |
| 1 | 8.004223000  | -0.288221000 | -1.074315000 |
| 1 | 8.059844000  | 0.826160000  | 0.291526000  |
| 6 | 8.930841000  | 1.602169000  | -1.520801000 |
| 6 | 9.263306000  | 1.321102000  | -2.855232000 |
| 6 | 9.554051000  | 2.692338000  | -0.896498000 |
| 6 | 10.188496000 | 2.105651000  | -3.546131000 |
| 6 | 10.481019000 | 3.480824000  | -1.583603000 |
| 6 | 10.800943000 | 3.190321000  | -2.911682000 |
| 1 | 8.796208000  | 0.474842000  | -3.354962000 |
| 1 | 9.316285000  | 2.920789000  | 0.139864000  |
| 1 | 10.435083000 | 1.867325000  | -4.577618000 |
| 1 | 10.955011000 | 4.319042000  | -1.079337000 |
| 1 | 11.523972000 | 3.800180000  | -3.446729000 |
| 7 | 1.544663000  | 3.374290000  | -3.294520000 |
| 1 | 1.455964000  | 2.649055000  | -2.574799000 |
| 1 | 2.326494000  | 3.141116000  | -3.911426000 |
| 1 | 1.754713000  | 4.333436000  | -2.768343000 |
| 6 | 0.254720000  | 3.472057000  | -4.052347000 |
| 1 | 0.356937000  | 4.330620000  | -4.721295000 |
| 6 | -0.846827000 | 3.744986000  | -3.000975000 |
| 8 | -1.998926000 | 4.071481000  | -3.411912000 |
| 8 | -0.503975000 | 3.577492000  | -1.806670000 |
| 6 | -0.036465000 | 2.186055000  | -4.892873000 |
| 1 | -0.655659000 | 2.495871000  | -5.739974000 |
| 1 | 0.910798000  | 1.827038000  | -5.317236000 |
| 6 | -0.767130000 | 1.123424000  | -4.118465000 |
| 6 | -2.134205000 | 0.971770000  | -4.142119000 |
| 1 | -2.857068000 | 1.435015000  | -4.798571000 |
| 7 | -2.535619000 | 0.154312000  | -3.106720000 |
| 1 | -3.491747000 | -0.089554000 | -2.895005000 |
| 6 | -1.440089000 | -0.224073000 | -2.376145000 |
| 6 | -0.283105000 | 0.308161000  | -3.018734000 |
| 6 | 0.979994000  | 0.001907000  | -2.512486000 |
| 6 | 1.072772000  | -0.888088000 | -1.338658000 |
| 6 | -1.378554000 | -0.835250000 | -1.097543000 |
| 6 | -0.160157000 | -1.046390000 | -0.531752000 |
| 1 | 1.896497000  | 0.301974000  | -3.004900000 |
| 1 | 1.319182000  | -2.029198000 | -1.639975000 |
| 1 | -2.291779000 | -1.078077000 | -0.564253000 |
| 1 | -0.056105000 | -1.477527000 | 0.453315000  |
| 7 | 2.311260000  | -0.623961000 | -0.497223000 |
| 8 | 2.382186000  | -1.166125000 | 0.601199000  |
| 8 | 3.216345000  | 0.052290000  | -0.992280000 |

<sup>4</sup>TS4<sub>B,C5-exo</sub>

|    |              |              |              |
|----|--------------|--------------|--------------|
| 26 | 0.439647000  | -3.912257000 | -2.333099000 |
| 7  | -0.046227000 | -3.511548000 | -0.408981000 |
| 7  | 2.327078000  | -4.385770000 | -1.758474000 |
| 7  | 0.874913000  | -4.511156000 | -4.215748000 |
| 7  | -1.480218000 | -3.583085000 | -2.879396000 |
| 6  | -1.254693000 | -3.062215000 | 0.059520000  |
| 6  | -1.165350000 | -2.753207000 | 1.482135000  |
| 6  | 0.120813000  | -3.031905000 | 1.840042000  |
| 6  | 0.810022000  | -3.498818000 | 0.660349000  |
| 6  | 2.846983000  | -4.278473000 | -0.497740000 |
| 6  | 4.241631000  | -4.665160000 | -0.500787000 |
| 6  | 4.550763000  | -5.004460000 | -1.782660000 |
| 6  | 3.345818000  | -4.826203000 | -2.562307000 |
| 6  | 2.093477000  | -4.927934000 | -4.685829000 |
| 6  | 2.013694000  | -5.185643000 | -6.104905000 |
| 6  | 0.732141000  | -4.913734000 | -6.482558000 |
| 6  | 0.028322000  | -4.490247000 | -5.294593000 |
| 6  | -2.002596000 | -3.690373000 | -4.142306000 |
| 6  | -3.988870000 | -3.314470000 | -4.133424000 |
| 6  | -3.707467000 | -2.985323000 | -2.848793000 |
| 6  | -2.498724000 | -3.155915000 | -2.073014000 |
| 6  | -2.404064000 | -2.914716000 | -0.705769000 |
| 6  | 2.149882000  | -3.866128000 | 0.633184000  |
| 6  | 3.247462000  | -5.080985000 | -3.923991000 |
| 6  | -1.309396000 | -4.109967000 | -5.270169000 |
| 1  | -3.305328000 | -2.577451000 | -0.204714000 |
| 1  | 2.696474000  | -3.826171000 | 1.570440000  |
| 1  | 4.140924000  | -5.426565000 | -4.434830000 |
| 1  | -1.855034000 | -4.145972000 | -6.208029000 |
| 1  | 0.582107000  | -2.901597000 | 2.811642000  |
| 1  | 4.880249000  | -4.671763000 | 0.373691000  |
| 1  | 5.497344000  | -5.346501000 | -2.182194000 |
| 1  | 2.839294000  | -5.529528000 | -6.715379000 |
| 1  | 0.288210000  | -4.986770000 | -7.467473000 |
| 1  | -4.038872000 | -3.301613000 | -5.006457000 |
| 1  | -4.655907000 | -2.652269000 | -2.446147000 |
| 6  | -2.251800000 | -2.143816000 | -2.323221000 |
| 6  | -2.391666000 | -0.637908000 | 2.042387000  |
| 6  | -3.461751000 | 0.095584000  | 2.849641000  |
| 8  | -3.688317000 | 1.317406000  | 2.473320000  |
| 8  | -4.030177000 | -0.458565000 | 3.809192000  |
| 1  | -2.024882000 | -2.293350000 | 3.383605000  |
| 1  | -3.214524000 | -2.637091000 | 2.140254000  |
| 1  | -1.434254000 | -0.136432000 | 2.241664000  |
| 1  | -2.593405000 | -0.468193000 | 0.978273000  |
| 16 | -0.180253000 | -6.302708000 | -1.936692000 |
| 1  | -0.883631000 | -6.146880000 | -0.792422000 |
| 8  | 0.853490000  | -2.337641000 | -2.639930000 |
| 7  | 3.273014000  | 1.303256000  | 2.350900000  |
| 1  | 4.244992000  | 1.470093000  | 2.107403000  |
| 1  | 2.696409000  | 2.136429000  | 2.410348000  |
| 6  | 2.883768000  | 0.245802000  | 3.109101000  |
| 8  | 1.747150000  | 0.157292000  | 3.584673000  |
| 6  | 3.905282000  | -0.875834000 | 3.306808000  |
| 1  | 3.570851000  | -1.448276000 | 4.175080000  |
| 1  | 3.848432000  | -1.540877000 | 2.435204000  |
| 6  | 5.366815000  | -0.434589000 | 3.506747000  |
| 1  | 5.758756000  | 0.082406000  | 2.626617000  |
| 1  | 5.977062000  | -1.336553000 | 3.638472000  |
| 6  | 5.554132000  | 0.400640000  | 4.772166000  |
| 8  | 5.200194000  | -0.009224000 | 5.879283000  |
| 7  | 6.160641000  | 1.610386000  | 4.602126000  |
| 1  | 6.352068000  | 1.941743000  | 3.657777000  |
| 6  | 6.477951000  | 2.447279000  | 5.743708000  |
| 1  | 6.826120000  | 1.823194000  | 6.569120000  |
| 1  | 7.290484000  | 3.125656000  | 5.461817000  |
| 6  | 5.325307000  | 3.297596000  | 6.307035000  |
| 8  | 5.294822000  | 3.603591000  | 7.500340000  |
| 7  | 4.413026000  | 3.724837000  | 5.402392000  |
| 1  | 4.432751000  | 3.364144000  | 4.454695000  |
| 6  | 3.193906000  | 4.415949000  | 5.780567000  |
| 1  | 2.765943000  | 3.914179000  | 6.657744000  |
| 6  | 3.418075000  | 5.903620000  | 6.189967000  |

|   |              |              |              |   |              |              |              |
|---|--------------|--------------|--------------|---|--------------|--------------|--------------|
| 1 | 4.127150000  | 5.876572000  | 7.022328000  | 1 | -5.068693000 | 0.544069000  | 4.869930000  |
| 1 | 2.472052000  | 6.285603000  | 6.592642000  | 6 | -7.266921000 | 6.311813000  | -1.695038000 |
| 6 | 3.919000000  | 6.820159000  | 5.096305000  | 1 | -7.369388000 | 7.275406000  | -1.184944000 |
| 6 | 5.294663000  | 7.005568000  | 4.894011000  | 1 | -8.158611000 | 5.715293000  | -1.466462000 |
| 6 | 3.020130000  | 7.515796000  | 4.272085000  | 1 | -7.261517000 | 6.503944000  | -2.774675000 |
| 6 | 5.762551000  | 7.858767000  | 3.891787000  | 6 | -5.988016000 | 5.593112000  | -1.254387000 |
| 6 | 3.484281000  | 8.367347000  | 3.266633000  | 1 | -5.998408000 | 5.441575000  | -0.166508000 |
| 6 | 4.857702000  | 8.541518000  | 3.074002000  | 1 | -5.110875000 | 6.215036000  | -1.471796000 |
| 1 | 6.002499000  | 6.487064000  | 5.535966000  | 6 | -5.813410000 | 4.240064000  | -1.962607000 |
| 1 | 1.949230000  | 7.395196000  | 4.422570000  | 1 | -6.681683000 | 3.593282000  | -1.785252000 |
| 1 | 6.832184000  | 7.996819000  | 3.755853000  | 1 | -5.763236000 | 4.392231000  | -3.045144000 |
| 1 | 2.775311000  | 8.897768000  | 2.636270000  | 7 | -4.592300000 | 3.532954000  | -1.584034000 |
| 1 | 5.219006000  | 9.208978000  | 2.296331000  | 1 | -3.743575000 | 3.691023000  | -2.156550000 |
| 6 | 2.216706000  | 4.263087000  | 4.605253000  | 6 | -4.456592000 | 2.751967000  | -0.507474000 |
| 8 | 2.606973000  | 3.893012000  | 3.491422000  | 7 | -3.280848000 | 2.180078000  | -0.235333000 |
| 7 | 0.921332000  | 4.533121000  | 4.872857000  | 1 | -5.289565000 | 1.987427000  | 1.167875000  |
| 1 | 0.674831000  | 5.012857000  | 5.730389000  | 1 | -6.336677000 | 3.026173000  | 0.276527000  |
| 6 | -0.097763000 | 4.494681000  | 3.840827000  | 7 | -5.509670000 | 2.449710000  | 0.289980000  |
| 1 | 0.406071000  | 4.607231000  | 2.874566000  | 1 | -3.190791000 | 1.762737000  | 0.693499000  |
| 6 | -0.808147000 | 3.114253000  | 3.808281000  | 1 | -2.428831000 | 2.517543000  | -0.712560000 |
| 1 | -0.010178000 | 2.361120000  | 3.739885000  | 6 | -7.826005000 | -1.151923000 | -3.886395000 |
| 8 | -1.579835000 | 3.095924000  | 2.603990000  | 1 | -7.508513000 | -2.097937000 | -4.340117000 |
| 1 | -2.277264000 | 2.402021000  | 2.658329000  | 1 | -8.881251000 | -1.247966000 | -3.603785000 |
| 6 | -1.648638000 | 2.833295000  | 5.053309000  | 1 | -7.240585000 | -1.008092000 | -2.970700000 |
| 1 | -1.027038000 | 2.880862000  | 5.953789000  | 6 | -7.619426000 | 0.022650000  | -4.860355000 |
| 1 | -2.081800000 | 1.828647000  | 5.003606000  | 6 | -6.174619000 | 0.201710000  | -5.280167000 |
| 1 | -2.468354000 | 3.553650000  | 5.151036000  | 6 | -5.295348000 | 0.998006000  | -4.533945000 |
| 6 | -1.021055000 | 5.716806000  | 4.018739000  | 6 | -5.658393000 | -0.449133000 | -6.411035000 |
| 8 | -0.758846000 | 6.606560000  | 4.834335000  | 6 | -3.952886000 | 1.143935000  | -4.888221000 |
| 7 | -2.079158000 | 5.739752000  | 3.177541000  | 6 | -4.319842000 | -0.321427000 | -6.779373000 |
| 1 | -2.225947000 | 4.901000000  | 2.615026000  | 6 | -3.458226000 | 0.474688000  | -6.014186000 |
| 6 | -2.920923000 | 6.905589000  | 2.983553000  | 8 | -2.156924000 | 0.570837000  | -6.422409000 |
| 1 | -2.431394000 | 7.732789000  | 3.503047000  | 1 | -1.636860000 | 1.061316000  | -5.759735000 |
| 6 | -3.050446000 | 7.234320000  | 1.467393000  | 1 | -7.980978000 | 0.945207000  | -4.387723000 |
| 1 | -3.734002000 | 8.088711000  | 1.370673000  | 1 | -8.243392000 | -0.136630000 | -5.749231000 |
| 1 | -3.545075000 | 6.383353000  | 0.984365000  | 1 | -5.663709000 | 1.522416000  | -3.654626000 |
| 6 | -1.739438000 | 7.525662000  | 0.799930000  | 1 | -6.316269000 | -1.067648000 | -7.018410000 |
| 6 | -0.997786000 | 6.658416000  | 0.023695000  | 1 | -3.301229000 | 1.790336000  | -4.304070000 |
| 7 | 0.167289000  | 7.260162000  | -0.392039000 | 1 | -3.928784000 | -0.828792000 | -7.656548000 |
| 1 | -1.213397000 | 5.636373000  | -0.262747000 | 8 | 2.287666000  | 6.085144000  | -1.910990000 |
| 1 | 0.889247000  | 6.836473000  | -0.990948000 | 8 | 3.827037000  | 7.535890000  | -1.168543000 |
| 6 | -0.977593000 | 8.747904000  | 0.873540000  | 6 | 3.362188000  | 6.389455000  | -1.252673000 |
| 6 | 0.213008000  | 8.538758000  | 0.116671000  | 6 | 4.042076000  | 5.228337000  | -0.499783000 |
| 6 | -1.171876000 | 9.996146000  | 1.496749000  | 1 | 3.269539000  | 4.755719000  | 0.123270000  |
| 1 | 1.201693000  | 9.523401000  | -0.017875000 | 1 | 4.348449000  | 4.460539000  | -1.224225000 |
| 6 | -0.197979000 | 10.979561000 | 1.360089000  | 6 | 5.214439000  | 5.673220000  | 0.380626000  |
| 6 | 0.979305000  | 10.743434000 | 0.614431000  | 1 | 4.923208000  | 6.593863000  | 0.893948000  |
| 1 | -2.070094000 | 10.192292000 | 2.078379000  | 1 | 6.070889000  | 5.962375000  | -0.244039000 |
| 1 | -0.339331000 | 11.945805000 | 1.837964000  | 6 | 5.618475000  | 4.659072000  | 1.462381000  |
| 1 | 1.724340000  | 11.530795000 | 0.532598000  | 1 | 4.741613000  | 4.388460000  | 2.059132000  |
| 1 | 2.108120000  | 9.316996000  | -0.581227000 | 1 | 6.319467000  | 5.141209000  | 2.159585000  |
| 6 | -4.318633000 | 6.659534000  | 3.568088000  | 6 | 6.286127000  | 3.353478000  | 1.052461000  |
| 8 | -4.986278000 | 5.670331000  | 3.225023000  | 8 | 6.149294000  | 2.323678000  | 1.744740000  |
| 7 | -4.778965000 | 7.598022000  | 4.420410000  | 7 | 7.083972000  | 3.378456000  | -0.034543000 |
| 1 | -4.161252000 | 8.357614000  | 4.674982000  | 1 | 7.167687000  | 4.250861000  | -0.539583000 |
| 6 | -6.127731000 | 7.596483000  | 4.985301000  | 6 | 7.950761000  | 2.276029000  | -0.440471000 |
| 1 | -6.476661000 | 8.633853000  | 5.003744000  | 1 | 7.826027000  | 1.492712000  | 0.307907000  |
| 1 | -6.765873000 | 7.047742000  | 4.288848000  | 1 | 8.992265000  | 2.617939000  | -0.396015000 |
| 6 | -6.210451000 | 7.009625000  | 6.405084000  | 6 | 7.660536000  | 1.742706000  | -1.853311000 |
| 1 | -5.537928000 | 7.578997000  | 7.058541000  | 1 | 8.454731000  | 1.018452000  | -2.083839000 |
| 1 | -7.227990000 | 7.188603000  | 6.779324000  | 1 | 7.774075000  | 2.558229000  | -2.578426000 |
| 6 | -5.871639000 | 5.515209000  | 6.526481000  | 6 | 6.304331000  | 1.088461000  | -2.032726000 |
| 1 | -5.814137000 | 5.252261000  | 7.590131000  | 6 | 5.907315000  | 0.010285000  | -1.225909000 |
| 1 | -4.878929000 | 5.318654000  | 6.104171000  | 6 | 5.432675000  | 1.516514000  | -3.042523000 |
| 6 | -6.908322000 | 4.600678000  | 5.854613000  | 6 | 4.673691000  | -0.613141000 | -1.417392000 |
| 1 | -7.900126000 | 4.778252000  | 6.283053000  | 6 | 4.201192000  | 0.885655000  | -3.247916000 |
| 1 | -6.983248000 | 4.807920000  | 4.784705000  | 6 | 3.813234000  | -0.179148000 | -2.430907000 |
| 7 | -6.625397000 | 3.174150000  | 6.021629000  | 1 | 6.571234000  | -0.353703000 | -0.445008000 |
| 1 | -6.863201000 | 2.763598000  | 6.914427000  | 1 | 5.728828000  | 2.337434000  | -3.691926000 |
| 6 | -5.845913000 | 2.430602000  | 5.208564000  | 1 | 4.386228000  | -1.449141000 | -0.784955000 |
| 7 | -5.301371000 | 2.942099000  | 4.105567000  | 1 | 3.564192000  | 1.212541000  | -4.065934000 |
| 1 | -5.256077000 | 3.945171000  | 3.926515000  | 1 | 2.860842000  | -0.679637000 | -2.582609000 |
| 1 | -4.710921000 | 2.328658000  | 3.518834000  | 7 | 1.283163000  | 3.765128000  | -2.548293000 |
| 7 | -5.630412000 | 1.140333000  | 5.505899000  | 1 | 0.878650000  | 3.314806000  | -1.707080000 |
| 1 | -6.199880000 | 0.684851000  | 6.204584000  | 1 | 1.916640000  | 3.099361000  | -2.998686000 |





|    |              |              |              |   |              |              |              |
|----|--------------|--------------|--------------|---|--------------|--------------|--------------|
| 6  | -3.066275000 | -4.692287000 | -2.171859000 | 8 | -1.876615000 | 2.692732000  | 2.939007000  |
| 6  | -1.924830000 | -4.596014000 | -1.291834000 | 1 | -2.408133000 | 1.868514000  | 3.101490000  |
| 6  | -1.988480000 | -4.118534000 | 0.015042000  | 6 | -1.697642000 | 2.834922000  | 5.373482000  |
| 6  | 2.463706000  | -4.431845000 | 1.867879000  | 1 | -1.002415000 | 3.012489000  | 6.200982000  |
| 6  | 4.113757000  | -6.152549000 | -2.354314000 | 1 | -2.121749000 | 1.834220000  | 5.507587000  |
| 6  | -0.344363000 | -5.828266000 | -4.220048000 | 1 | -2.514586000 | 3.562497000  | 5.433812000  |
| 1  | -2.966135000 | -3.814311000 | 0.374931000  | 6 | -1.221006000 | 5.535795000  | 3.820890000  |
| 1  | 2.911456000  | -4.220255000 | 2.833810000  | 8 | -0.886430000 | 6.556755000  | 4.427377000  |
| 1  | 5.081380000  | -6.477216000 | -2.724538000 | 7 | -2.364456000 | 5.412104000  | 3.108343000  |
| 1  | -0.794614000 | -6.054003000 | -5.181858000 | 1 | -2.589479000 | 4.488829000  | 2.742039000  |
| 1  | 0.633307000  | -3.257554000 | 3.718737000  | 6 | -3.281927000 | 6.510965000  | 2.878605000  |
| 1  | 5.244726000  | -5.063152000 | 1.987209000  | 1 | -2.862378000 | 7.378455000  | 3.392803000  |
| 1  | 6.173319000  | -6.013731000 | -0.378733000 | 6 | -3.430804000 | 6.820976000  | 1.355718000  |
| 1  | 4.040708000  | -6.985084000 | -5.089316000 | 1 | -4.145655000 | 7.649895000  | 1.259434000  |
| 1  | 1.542737000  | -6.803122000 | -6.135070000 | 1 | -3.899863000 | 5.947848000  | 0.886365000  |
| 1  | -3.163000000 | -5.362140000 | -4.273037000 | 6 | -2.141195000 | 7.144323000  | 0.658482000  |
| 1  | -4.079804000 | -4.429674000 | -1.895005000 | 6 | -1.422358000 | 6.290611000  | -0.151626000 |
| 6  | -2.179225000 | -2.818183000 | 2.902792000  | 7 | -0.283407000 | 6.904422000  | -0.616990000 |
| 6  | -2.217742000 | -1.285202000 | 2.723043000  | 1 | -1.639858000 | 5.276543000  | -0.451645000 |
| 6  | -3.367624000 | -0.555009000 | 3.427101000  | 1 | 0.412909000  | 6.477015000  | -1.238529000 |
| 8  | -3.587387000 | 0.657820000  | 3.024091000  | 6 | -1.393695000 | 8.377915000  | 0.698126000  |
| 8  | -4.005561000 | -1.103977000 | 4.346208000  | 6 | -0.233131000 | 8.184954000  | -0.110916000 |
| 1  | -2.156583000 | -3.040710000 | 3.974884000  | 6 | -1.581300000 | 9.626864000  | 1.321372000  |
| 1  | -3.111688000 | -3.250752000 | 2.521712000  | 6 | 0.729146000  | 9.186880000  | -0.295443000 |
| 1  | -1.282282000 | -0.850686000 | 3.104514000  | 6 | -0.633927000 | 10.627956000 | 1.133459000  |
| 1  | -2.251419000 | -1.018099000 | 1.662090000  | 6 | 0.512053000  | 10.408282000 | 0.336851000  |
| 16 | 0.505786000  | -7.398713000 | -0.451474000 | 1 | -2.455899000 | 9.810570000  | 1.941821000  |
| 1  | 1.533078000  | -7.597668000 | 0.405710000  | 1 | -0.772240000 | 11.595014000 | 1.610645000  |
| 8  | 1.472698000  | -3.451987000 | -1.763936000 | 1 | 1.237688000  | 11.208577000 | 0.215456000  |
| 7  | 2.865223000  | 1.149342000  | 2.615583000  | 1 | 1.614605000  | 8.991062000  | -0.894291000 |
| 1  | 3.777996000  | 1.189973000  | 2.175459000  | 6 | -4.656563000 | 6.146322000  | 3.455859000  |
| 1  | 2.312211000  | 1.998249000  | 2.572396000  | 8 | -5.166014000 | 5.038288000  | 3.225260000  |
| 6  | 2.506831000  | 0.191466000  | 3.498819000  | 7 | -5.276059000 | 7.109109000  | 4.169336000  |
| 8  | 1.414452000  | 0.201165000  | 4.082796000  | 1 | -4.778894000 | 7.973697000  | 4.338038000  |
| 6  | 3.508314000  | -0.938985000 | 3.733833000  | 6 | -6.639902000 | 6.995726000  | 4.685708000  |
| 1  | 3.266386000  | -1.367648000 | 4.709390000  | 1 | -7.109983000 | 7.978687000  | 4.581381000  |
| 1  | 3.322099000  | -1.709269000 | 2.976453000  | 1 | -7.176329000 | 6.305082000  | 4.030801000  |
| 6  | 4.996158000  | -0.545245000 | 3.694531000  | 6 | -6.718008000 | 6.551349000  | 6.156702000  |
| 1  | 5.292773000  | -0.181691000 | 2.706965000  | 1 | -6.126963000 | 7.248586000  | 6.763286000  |
| 1  | 5.590056000  | -1.447297000 | 3.887293000  | 1 | -7.760907000 | 6.666875000  | 6.483503000  |
| 6  | 5.358932000  | 0.454831000  | 4.789715000  | 6 | -6.245301000 | 5.116752000  | 6.445200000  |
| 8  | 5.118074000  | 0.231741000  | 5.978225000  | 1 | -6.191506000 | 4.974686000  | 7.531840000  |
| 7  | 5.987142000  | 1.593061000  | 4.377601000  | 1 | -5.229352000 | 4.969579000  | 6.060454000  |
| 1  | 6.056824000  | 1.790173000  | 3.379801000  | 6 | -7.178429000 | 4.044441000  | 5.860364000  |
| 6  | 6.418456000  | 2.585070000  | 5.344392000  | 1 | -8.194264000 | 4.181060000  | 6.245459000  |
| 1  | 6.870664000  | 2.088570000  | 6.205120000  | 1 | -7.238580000 | 4.124340000  | 4.772500000  |
| 1  | 7.178514000  | 3.218580000  | 4.874776000  | 7 | -6.781220000 | 2.674974000  | 6.190681000  |
| 6  | 5.314336000  | 3.498331000  | 5.908053000  | 1 | -7.025392000 | 2.334232000  | 7.110669000  |
| 8  | 5.380053000  | 3.935924000  | 7.057987000  | 6 | -5.947746000 | 1.904491000  | 5.462127000  |
| 7  | 4.326802000  | 3.822081000  | 5.039701000  | 7 | -5.413606000 | 2.336820000  | 4.320860000  |
| 1  | 4.284460000  | 3.369268000  | 4.133426000  | 1 | -5.407550000 | 3.321342000  | 4.057249000  |
| 6  | 3.133684000  | 4.550876000  | 5.431394000  | 1 | -4.767868000 | 1.700224000  | 3.819657000  |
| 1  | 2.760272000  | 4.130080000  | 6.373641000  | 7 | -5.658861000 | 0.662624000  | 5.886913000  |
| 6  | 3.378858000  | 6.067962000  | 5.694327000  | 1 | -6.228906000 | 0.239211000  | 6.605245000  |
| 1  | 4.111914000  | 6.112974000  | 6.504544000  | 1 | -5.077277000 | 0.030075000  | 5.306454000  |
| 1  | 2.444722000  | 6.491881000  | 6.082739000  | 6 | -7.597284000 | 3.810453000  | -2.254316000 |
| 6  | 3.855492000  | 6.870666000  | 4.505708000  | 1 | -8.265386000 | 4.613866000  | -1.926190000 |
| 6  | 5.226418000  | 7.045747000  | 4.267642000  | 1 | -8.069852000 | 2.855524000  | -1.993357000 |
| 6  | 2.939065000  | 7.464464000  | 3.623856000  | 1 | -7.524861000 | 3.861596000  | -3.347198000 |
| 6  | 5.673187000  | 7.791080000  | 3.174065000  | 6 | -6.217697000 | 3.946933000  | -1.604501000 |
| 6  | 3.381670000  | 8.207745000  | 2.527615000  | 1 | -6.314282000 | 3.947300000  | -0.510658000 |
| 6  | 4.751052000  | 8.373486000  | 2.300235000  | 1 | -5.766590000 | 4.908850000  | -1.877265000 |
| 1  | 5.946506000  | 6.604221000  | 4.952334000  | 6 | -5.265466000 | 2.822513000  | -2.039649000 |
| 1  | 1.871623000  | 7.346663000  | 3.800369000  | 1 | -5.684607000 | 1.839736000  | -1.787961000 |
| 1  | 6.739632000  | 7.922243000  | 3.009067000  | 1 | -5.149609000 | 2.841175000  | -3.127802000 |
| 1  | 2.658760000  | 8.659170000  | 1.853603000  | 7 | -3.922040000 | 2.937921000  | -1.478281000 |
| 1  | 5.094903000  | 8.955257000  | 1.449267000  | 1 | -3.217793000 | 3.408067000  | -2.062796000 |
| 6  | 2.088144000  | 4.301860000  | 4.335701000  | 6 | -3.535817000 | 2.465073000  | -0.283122000 |
| 8  | 2.420619000  | 3.922341000  | 3.206032000  | 7 | -2.245592000 | 2.526259000  | 0.061488000  |
| 7  | 0.801603000  | 4.493866000  | 4.696153000  | 1 | -4.088430000 | 1.378108000  | 1.383662000  |
| 1  | 0.595414000  | 4.949340000  | 5.575898000  | 1 | -5.398249000 | 1.883340000  | 0.351355000  |
| 6  | -0.300060000 | 4.297707000  | 3.773038000  | 7 | -4.415346000 | 1.912822000  | 0.570853000  |
| 1  | 0.131663000  | 4.257480000  | 2.767579000  | 1 | -1.973521000 | 2.465776000  | 1.042891000  |
| 6  | -0.974600000 | 2.923450000  | 4.029815000  | 1 | -1.572834000 | 2.928209000  | -0.606593000 |
| 1  | -0.172131000 | 2.174444000  | 4.001153000  | 6 | -8.963627000 | 6.190631000  | -6.275068000 |

|   |              |              |              |   |              |              |              |
|---|--------------|--------------|--------------|---|--------------|--------------|--------------|
| 1 | -9.130595000 | 5.190499000  | -6.691930000 | 1 | 1.392901000  | -2.067665000 | -1.723585000 |
| 1 | -9.853232000 | 6.797656000  | -6.482090000 | 1 | -2.127758000 | -1.158590000 | -0.539911000 |
| 1 | -8.868858000 | 6.086936000  | -5.187731000 | 1 | 0.148475000  | -1.512870000 | 0.403632000  |
| 6 | -7.701529000 | 6.833876000  | -6.877948000 | 7 | 2.470507000  | -0.658240000 | -0.651797000 |
| 6 | -6.445355000 | 6.029925000  | -6.613578000 | 8 | 2.573184000  | -1.169166000 | 0.466099000  |
| 6 | -5.681939000 | 6.233543000  | -5.455733000 | 8 | 3.401409000  | -0.074027000 | -1.225590000 |
| 6 | -6.024562000 | 5.025027000  | -7.498157000 |   |              |              |              |
| 6 | -4.548212000 | 5.467300000  | -5.178270000 |   |              |              |              |
| 6 | -4.896837000 | 4.248443000  | -7.239132000 |   |              |              |              |
| 6 | -4.149340000 | 4.460315000  | -6.071532000 |   |              |              |              |
| 8 | -3.056963000 | 3.679241000  | -5.857317000 |   |              |              |              |
| 1 | -2.641956000 | 3.891296000  | -4.975765000 |   |              |              |              |
| 1 | -7.585279000 | 7.845343000  | -6.467557000 |   |              |              |              |
| 1 | -7.842772000 | 6.951373000  | -7.960151000 |   |              |              |              |
| 1 | -5.973152000 | 7.013647000  | -4.754688000 |   |              |              |              |
| 1 | -6.590146000 | 4.846995000  | -8.410953000 |   |              |              |              |
| 1 | -3.963416000 | 5.648443000  | -4.280801000 |   |              |              |              |
| 1 | -4.578891000 | 3.474773000  | -7.932500000 |   |              |              |              |
| 8 | 1.899945000  | 5.721309000  | -2.219909000 |   |              |              |              |
| 8 | 3.339876000  | 7.203646000  | -1.347250000 |   |              |              |              |
| 6 | 2.932402000  | 6.042786000  | -1.505660000 |   |              |              |              |
| 6 | 3.614846000  | 4.883218000  | -0.750751000 |   |              |              |              |
| 1 | 2.926315000  | 4.604929000  | 0.061490000  |   |              |              |              |
| 1 | 3.673106000  | 4.001571000  | -1.401002000 |   |              |              |              |
| 6 | 4.984994000  | 5.231566000  | -0.160178000 |   |              |              |              |
| 1 | 4.920805000  | 6.236424000  | 0.266004000  |   |              |              |              |
| 1 | 5.736437000  | 5.306323000  | -0.959753000 |   |              |              |              |
| 6 | 5.452300000  | 4.281424000  | 0.954597000  |   |              |              |              |
| 1 | 4.713066000  | 4.274082000  | 1.762573000  |   |              |              |              |
| 1 | 6.384129000  | 4.663650000  | 1.395800000  |   |              |              |              |
| 6 | 5.712726000  | 2.820223000  | 0.609949000  |   |              |              |              |
| 8 | 5.600403000  | 1.928024000  | 1.476293000  |   |              |              |              |
| 7 | 6.102786000  | 2.530622000  | -0.646148000 |   |              |              |              |
| 1 | 6.238404000  | 3.294899000  | -1.292809000 |   |              |              |              |
| 6 | 6.444140000  | 1.180223000  | -1.089013000 |   |              |              |              |
| 1 | 6.274239000  | 1.139542000  | -2.168924000 |   |              |              |              |
| 1 | 5.744915000  | 0.488193000  | -0.617248000 |   |              |              |              |
| 6 | 7.897792000  | 0.775941000  | -0.762536000 |   |              |              |              |
| 1 | 8.015887000  | -0.275531000 | -1.053250000 |   |              |              |              |
| 1 | 8.032520000  | 0.826746000  | 0.323416000  |   |              |              |              |
| 6 | 8.936585000  | 1.626010000  | -1.462291000 |   |              |              |              |
| 6 | 9.312994000  | 1.349715000  | -2.785990000 |   |              |              |              |
| 6 | 9.523936000  | 2.726258000  | -0.820958000 |   |              |              |              |
| 6 | 10.245700000 | 2.148583000  | -3.449966000 |   |              |              |              |
| 6 | 10.458091000 | 3.529162000  | -1.481053000 |   |              |              |              |
| 6 | 10.821780000 | 3.243211000  | -2.798855000 |   |              |              |              |
| 1 | 8.874301000  | 0.495985000  | -3.298585000 |   |              |              |              |
| 1 | 9.251973000  | 2.951423000  | 0.207695000  |   |              |              |              |
| 1 | 10.526402000 | 1.913685000  | -4.473508000 |   |              |              |              |
| 1 | 10.903460000 | 4.375101000  | -0.963744000 |   |              |              |              |
| 1 | 11.550566000 | 3.864216000  | -3.312874000 |   |              |              |              |
| 7 | 1.521119000  | 3.391286000  | -3.332109000 |   |              |              |              |
| 1 | 1.448478000  | 2.655707000  | -2.620700000 |   |              |              |              |
| 1 | 2.297237000  | 3.171392000  | -3.961008000 |   |              |              |              |
| 1 | 1.730658000  | 4.345510000  | -2.799770000 |   |              |              |              |
| 6 | 0.221917000  | 3.485172000  | -4.074631000 |   |              |              |              |
| 1 | 0.313425000  | 4.343639000  | -4.745410000 |   |              |              |              |
| 6 | -0.868941000 | 3.753286000  | -3.012196000 |   |              |              |              |
| 8 | -2.028114000 | 4.067955000  | -3.414073000 |   |              |              |              |
| 8 | -0.514291000 | 3.593897000  | -1.820582000 |   |              |              |              |
| 6 | -0.076716000 | 2.197624000  | -4.908540000 |   |              |              |              |
| 1 | -0.724415000 | 2.501196000  | -5.736283000 |   |              |              |              |
| 1 | 0.862621000  | 1.852292000  | -5.361250000 |   |              |              |              |
| 6 | -0.767582000 | 1.123421000  | -4.113728000 |   |              |              |              |
| 6 | -2.131924000 | 0.944087000  | -4.094747000 |   |              |              |              |
| 1 | -2.884198000 | 1.393731000  | -4.727204000 |   |              |              |              |
| 7 | -2.483670000 | 0.110680000  | -3.054839000 |   |              |              |              |
| 1 | -3.427822000 | -0.149399000 | -2.811751000 |   |              |              |              |
| 6 | -1.356053000 | -0.250455000 | -2.360806000 |   |              |              |              |
| 6 | -0.232362000 | 0.313100000  | -3.035368000 |   |              |              |              |
| 6 | 1.053539000  | 0.037260000  | -2.569246000 |   |              |              |              |
| 6 | 1.199986000  | -0.853865000 | -1.409089000 |   |              |              |              |
| 6 | -1.239244000 | -0.877490000 | -1.095342000 |   |              |              |              |
| 6 | 0.003552000  | -1.064402000 | -0.568647000 |   |              |              |              |
| 1 | 1.947816000  | 0.364976000  | -3.083769000 |   |              |              |              |

## Model B system – C4

<sup>2</sup>TS4<sub>B,C4-endo</sub>

|    |              |              |              |
|----|--------------|--------------|--------------|
| 26 | 2.601809000  | -4.490955000 | -0.150338000 |
| 7  | 1.315748000  | -4.122207000 | 1.372215000  |
| 7  | 4.032847000  | -5.034071000 | 1.172847000  |
| 7  | 3.824987000  | -5.033903000 | -1.673803000 |
| 7  | 1.117006000  | -4.110160000 | -1.474972000 |
| 6  | 0.030800000  | -3.652341000 | 1.280150000  |
| 6  | -0.523626000 | -3.420932000 | 2.610861000  |
| 6  | 0.462427000  | -3.772668000 | 3.484055000  |
| 6  | 1.602028000  | -4.201545000 | 2.707554000  |
| 6  | 3.937419000  | -4.990894000 | 2.537087000  |
| 6  | 5.192775000  | -5.391401000 | 3.136388000  |
| 6  | 6.043564000  | -5.671705000 | 2.111589000  |
| 6  | 5.307788000  | -5.444379000 | 0.886019000  |
| 6  | 5.128059000  | -5.443322000 | -1.575955000 |
| 6  | 5.679126000  | -5.667669000 | -2.894217000 |
| 6  | 4.688823000  | -5.386599000 | -3.785855000 |
| 6  | 3.534017000  | -4.986822000 | -3.011819000 |
| 6  | 1.197917000  | -4.197894000 | -2.839302000 |
| 6  | -0.055256000 | -3.791031000 | -3.436551000 |
| 6  | -0.887000000 | -3.452195000 | -2.406686000 |
| 6  | -0.141869000 | -3.660039000 | -1.185610000 |
| 6  | -0.655412000 | -3.442910000 | 0.091177000  |
| 6  | 2.810287000  | -4.613251000 | 3.258297000  |
| 6  | 5.827756000  | -5.635026000 | -0.388667000 |
| 6  | 2.314001000  | -4.608377000 | -3.562428000 |
| 1  | -1.679601000 | -3.090314000 | 0.152918000  |
| 1  | 2.884054000  | -4.627185000 | 4.341463000  |
| 1  | 6.858568000  | -5.967868000 | -0.463743000 |
| 1  | 2.226011000  | -4.632173000 | -4.644664000 |
| 1  | 0.433060000  | -3.737114000 | 4.566627000  |
| 1  | 5.377130000  | -5.442894000 | 4.202171000  |
| 1  | 7.073467000  | -6.003107000 | 2.158889000  |
| 1  | 6.691198000  | -5.999278000 | -3.090471000 |
| 1  | 4.717867000  | -5.437906000 | -4.867220000 |
| 1  | -0.262260000 | -3.792144000 | -4.499985000 |
| 1  | -1.913872000 | -3.111025000 | -2.452740000 |
| 6  | -1.875818000 | -2.853220000 | 2.939228000  |
| 6  | -1.981729000 | -1.344006000 | 2.645247000  |
| 6  | -3.224270000 | -0.672336000 | 3.234965000  |
| 8  | -3.576656000 | 0.452288000  | 2.692675000  |
| 8  | -3.809858000 | -1.188951000 | 4.206524000  |
| 1  | -2.083124000 | -3.011110000 | 4.001663000  |
| 1  | -2.664706000 | -3.382628000 | 2.388104000  |
| 1  | -1.105168000 | -0.826951000 | 3.061519000  |
| 1  | -1.952912000 | -1.151595000 | 1.567569000  |
| 16 | 1.771335000  | -6.878845000 | -0.075548000 |
| 1  | 2.945685000  | -7.500421000 | -0.329009000 |
| 8  | 3.133499000  | -2.933717000 | -0.182462000 |
| 7  | 2.826373000  | 1.388930000  | 1.804174000  |
| 1  | 3.760649000  | 1.528730000  | 1.432522000  |
| 1  | 2.294380000  | 2.241762000  | 1.951874000  |
| 6  | 2.543998000  | 0.353756000  | 2.641737000  |
| 8  | 1.494383000  | 0.306154000  | 3.293130000  |
| 6  | 3.563479000  | -0.780949000 | 2.699527000  |
| 1  | 3.301010000  | -1.390191000 | 3.566692000  |
| 1  | 3.436586000  | -1.408269000 | 1.806726000  |
| 6  | 5.038397000  | -0.343119000 | 2.795379000  |
| 1  | 5.364421000  | 0.180583000  | 1.892597000  |
| 1  | 5.651518000  | -1.249531000 | 2.871621000  |
| 6  | 5.328554000  | 0.485603000  | 4.044784000  |
| 8  | 5.076507000  | 0.070002000  | 5.177563000  |
| 7  | 5.907086000  | 1.702826000  | 3.828873000  |
| 1  | 6.008046000  | 2.046476000  | 2.875330000  |
| 6  | 6.297670000  | 2.545322000  | 4.942399000  |
| 1  | 6.720213000  | 1.928189000  | 5.737717000  |
| 1  | 7.072585000  | 3.239214000  | 4.598665000  |
| 6  | 5.173852000  | 3.369524000  | 5.594061000  |
| 8  | 5.209075000  | 3.646297000  | 6.794367000  |
| 7  | 4.201376000  | 3.806790000  | 4.757949000  |
| 1  | 4.168769000  | 3.481635000  | 3.797523000  |
| 6  | 2.995380000  | 4.455682000  | 5.239815000  |

|   |              |              |              |
|---|--------------|--------------|--------------|
| 1 | 2.661798000  | 3.933482000  | 6.145006000  |
| 6 | 3.203178000  | 5.946942000  | 5.642137000  |
| 1 | 3.971070000  | 5.939305000  | 6.421154000  |
| 1 | 2.276475000  | 6.298511000  | 6.111996000  |
| 6 | 3.595710000  | 6.878038000  | 4.517992000  |
| 6 | 4.946352000  | 7.107100000  | 4.217903000  |
| 6 | 2.617555000  | 7.539395000  | 3.758610000  |
| 6 | 5.312899000  | 7.971214000  | 3.183034000  |
| 6 | 2.980501000  | 8.400449000  | 2.720934000  |
| 6 | 4.330113000  | 8.619293000  | 2.430442000  |
| 1 | 5.714724000  | 6.614023000  | 4.808303000  |
| 1 | 1.564880000  | 7.379021000  | 3.983030000  |
| 1 | 6.364994000  | 8.142629000  | 2.969848000  |
| 1 | 2.210851000  | 8.902093000  | 2.140491000  |
| 1 | 4.610843000  | 9.288634000  | 1.622356000  |
| 6 | 1.930545000  | 4.277358000  | 4.148048000  |
| 8 | 2.246748000  | 3.984807000  | 2.988483000  |
| 7 | 0.650330000  | 4.437587000  | 4.544028000  |
| 1 | 0.455414000  | 4.817418000  | 5.461319000  |
| 6 | -0.469069000 | 4.279069000  | 3.635529000  |
| 1 | -0.071496000 | 4.361360000  | 2.618459000  |
| 6 | -1.073677000 | 2.854923000  | 3.762450000  |
| 1 | -0.233195000 | 2.156434000  | 3.650892000  |
| 8 | -1.968147000 | 2.700617000  | 2.656554000  |
| 1 | -2.454275000 | 1.849033000  | 2.748097000  |
| 6 | -1.764289000 | 2.602829000  | 5.103988000  |
| 1 | -1.063890000 | 2.741401000  | 5.934952000  |
| 1 | -2.133279000 | 1.572901000  | 5.154078000  |
| 1 | -2.616435000 | 3.277293000  | 5.242848000  |
| 6 | -1.452169000 | 5.451807000  | 3.831444000  |
| 8 | -1.154467000 | 6.431790000  | 4.519375000  |
| 7 | -2.615386000 | 5.318437000  | 3.151898000  |
| 1 | -2.774211000 | 4.425475000  | 2.683950000  |
| 6 | -3.574763000 | 6.392654000  | 2.994028000  |
| 1 | -3.192343000 | 7.241557000  | 3.565293000  |
| 6 | -3.727023000 | 6.791617000  | 1.492214000  |
| 1 | -4.493786000 | 7.575566000  | 1.432708000  |
| 1 | -4.128543000 | 5.919618000  | 0.962002000  |
| 6 | -2.451713000 | 7.249789000  | 0.851015000  |
| 6 | -1.575253000 | 6.470346000  | 0.123168000  |
| 7 | -0.495570000 | 7.215131000  | -0.289487000 |
| 1 | -1.641931000 | 5.419624000  | -0.131297000 |
| 1 | 0.296134000  | 6.875016000  | -0.854633000 |
| 6 | -1.871314000 | 8.569671000  | 0.893805000  |
| 6 | -0.643961000 | 8.503455000  | 0.169529000  |
| 6 | -2.255739000 | 9.801692000  | 1.457872000  |
| 6 | 0.197224000  | 9.613609000  | 0.010725000  |
| 6 | -1.428067000 | 10.907973000 | 1.297185000  |
| 6 | -0.211106000 | 10.813846000 | 0.584851000  |
| 1 | -3.186707000 | 9.891028000  | 2.013664000  |
| 1 | -1.717260000 | 11.862360000 | 1.730105000  |
| 1 | 0.416161000  | 11.695660000 | 0.482768000  |
| 1 | 1.134962000  | 9.519258000  | -0.530926000 |
| 6 | -4.943165000 | 5.949526000  | 3.524133000  |
| 8 | -5.423449000 | 8.494599000  | 3.204941000  |
| 7 | -5.600000000 | 6.846807000  | 4.287124000  |
| 1 | -5.126600000 | 7.708608000  | 4.524503000  |
| 6 | -6.973511000 | 6.672487000  | 4.758356000  |
| 1 | -7.461964000 | 7.650690000  | 4.707897000  |
| 1 | -7.477972000 | 6.016620000  | 4.044961000  |
| 6 | -7.079953000 | 6.126475000  | 6.192301000  |
| 1 | -6.544106000 | 6.805490000  | 6.867050000  |
| 1 | -8.138116000 | 6.171726000  | 6.485510000  |
| 6 | -6.549585000 | 4.699110000  | 6.399901000  |
| 1 | -6.567768000 | 4.470492000  | 7.472998000  |
| 1 | -5.500890000 | 4.635461000  | 6.086094000  |
| 6 | -7.371666000 | 3.632969000  | 5.659076000  |
| 1 | -8.422752000 | 3.690673000  | 5.961495000  |
| 1 | -7.341154000 | 3.793304000  | 4.579566000  |
| 7 | -6.927878000 | 2.265349000  | 5.929519000  |
| 1 | -7.203771000 | 1.865278000  | 6.816143000  |
| 6 | -6.009065000 | 1.573662000  | 5.224173000  |
| 7 | -5.425504000 | 2.085258000  | 4.139254000  |
| 1 | -5.470118000 | 3.076756000  | 3.905733000  |
| 1 | -4.747771000 | 1.500236000  | 3.626833000  |





|    |              |              |              |   |              |              |              |
|----|--------------|--------------|--------------|---|--------------|--------------|--------------|
| 1  | -1.966730000 | -1.205813000 | 1.426861000  | 6 | 0.232211000  | 10.798618000 | 0.961737000  |
| 16 | 1.538381000  | -7.233576000 | 0.195498000  | 1 | -2.746498000 | 9.949906000  | 2.429552000  |
| 1  | 2.687506000  | -7.912620000 | -0.022641000 | 1 | -1.150612000 | 11.834893000 | 2.263398000  |
| 8  | 3.138324000  | -3.355145000 | -0.056870000 | 1 | 0.917756000  | 11.640903000 | 0.914732000  |
| 7  | 2.931259000  | 1.253292000  | 1.734757000  | 1 | 1.442563000  | 9.521063000  | -0.320030000 |
| 1  | 3.874159000  | 1.383812000  | 1.382707000  | 6 | -4.769466000 | 6.070340000  | 3.625636000  |
| 1  | 2.408010000  | 2.110141000  | 1.888660000  | 8 | -5.308248000 | 5.026165000  | 3.221719000  |
| 6  | 2.609387000  | 0.203507000  | 2.539917000  | 7 | -5.380957000 | 6.940135000  | 4.455385000  |
| 8  | 1.542405000  | 0.161117000  | 3.162070000  | 1 | -4.864484000 | 7.757123000  | 4.753962000  |
| 6  | 3.606444000  | -0.951414000 | 2.600182000  | 6 | -6.776645000 | 6.823990000  | 4.882215000  |
| 1  | 3.336155000  | -1.547677000 | 3.474414000  | 1 | -7.192170000 | 7.836191000  | 4.906959000  |
| 1  | 3.460282000  | -1.587501000 | 1.716464000  | 1 | -7.306995000 | 6.272516000  | 4.102176000  |
| 6  | 5.090691000  | -0.545014000 | 2.685489000  | 6 | -6.970227000 | 6.165372000  | 6.259183000  |
| 1  | 5.422145000  | -0.027105000 | 1.781045000  | 1 | -6.429989000 | 6.754154000  | 7.010826000  |
| 1  | 5.685579000  | -1.463779000 | 2.755918000  | 1 | -8.036600000 | 6.242670000  | 6.512678000  |
| 6  | 5.404106000  | 0.272884000  | 3.936570000  | 6 | -6.520755000 | 6.699012000  | 4.360095000  |
| 8  | 5.160803000  | -0.148686000 | 5.069086000  | 1 | -6.620318000 | 4.372934000  | 7.403123000  |
| 7  | 5.987796000  | 1.487956000  | 3.724226000  | 1 | -5.457247000 | 4.611510000  | 6.106950000  |
| 1  | 6.096550000  | 1.832154000  | 2.770589000  | 6 | -7.336295000 | 3.749256000  | 5.468803000  |
| 6  | 6.411517000  | 2.307255000  | 4.843161000  | 1 | -8.403552000 | 3.839463000  | 5.698059000  |
| 1  | 6.861150000  | 1.676580000  | 5.612669000  | 1 | -7.211342000 | 4.001291000  | 4.414399000  |
| 1  | 7.172661000  | 3.011274000  | 4.489148000  | 7 | -6.983730000 | 2.340948000  | 5.647846000  |
| 6  | 5.306483000  | 3.114732000  | 5.547320000  | 1 | -7.351748000 | 1.885000000  | 6.471821000  |
| 8  | 5.380039000  | 3.369249000  | 6.750599000  | 6 | -6.044767000 | 1.654991000  | 4.962147000  |
| 7  | 4.309210000  | 3.565158000  | 4.748041000  | 7 | -5.348108000 | 2.211407000  | 3.970103000  |
| 1  | 4.246991000  | 3.240851000  | 3.789110000  | 1 | -5.354807000 | 3.214423000  | 3.786436000  |
| 6  | 3.109730000  | 4.198316000  | 5.265783000  | 1 | -4.667360000 | 1.626436000  | 3.463844000  |
| 1  | 2.759705000  | 3.625011000  | 6.133815000  | 7 | -5.823747000 | 0.372902000  | 5.280273000  |
| 6  | 3.331561000  | 5.657594000  | 5.765593000  | 1 | -6.462107000 | -0.104965000 | 5.899774000  |
| 1  | 4.090841000  | 5.588589000  | 6.549587000  | 1 | -5.139567000 | -0.200100000 | 4.746134000  |
| 1  | 2.404455000  | 5.987137000  | 6.250237000  | 6 | -7.598914000 | 5.379353000  | -1.308411000 |
| 6  | 3.745647000  | 6.661556000  | 4.713638000  | 1 | -7.722938000 | 6.312933000  | -0.749727000 |
| 6  | 5.102314000  | 6.907720000  | 4.456597000  | 1 | -8.467468000 | 4.743849000  | -1.096196000 |
| 6  | 2.783350000  | 7.380903000  | 3.987233000  | 1 | -7.615208000 | 5.623043000  | -2.377507000 |
| 6  | 5.490355000  | 7.845663000  | 3.496807000  | 6 | -6.288324000 | 4.683068000  | -0.921841000 |
| 6  | 3.167549000  | 8.316424000  | 3.023988000  | 1 | -6.267812000 | 4.486175000  | 0.158205000  |
| 6  | 4.523042000  | 8.552356000  | 2.777121000  | 1 | -5.438950000 | 5.344789000  | -1.133411000 |
| 1  | 5.858076000  | 6.369876000  | 5.023805000  | 6 | -6.079493000 | 3.367916000  | -1.691207000 |
| 1  | 1.726174000  | 7.210837000  | 4.181107000  | 1 | -6.903045000 | 2.668347000  | -1.502310000 |
| 1  | 6.546613000  | 8.029235000  | 3.317075000  | 1 | -6.089221000 | 3.565752000  | -2.767506000 |
| 1  | 2.410115000  | 8.864194000  | 2.469666000  | 7 | -4.801437000 | 2.717277000  | -1.404629000 |
| 1  | 4.821571000  | 9.283928000  | 2.031162000  | 1 | -3.998564000 | 2.951723000  | -2.007492000 |
| 6  | 2.045948000  | 4.099179000  | 4.160188000  | 6 | -4.545005000 | 1.898311000  | -0.380197000 |
| 8  | 2.356453000  | 3.823974000  | 2.994427000  | 7 | -3.293470000 | 1.455330000  | -0.182766000 |
| 7  | 0.771296000  | 4.303339000  | 4.553482000  | 1 | -5.226318000 | 0.967647000  | 1.284560000  |
| 1  | 0.586750000  | 4.679057000  | 5.474916000  | 1 | -6.455889000 | 1.799957000  | 0.385133000  |
| 6  | -0.350621000 | 4.222971000  | 3.636811000  | 7 | -5.517637000 | 1.435809000  | 0.430798000  |
| 1  | 0.046332000  | 4.347804000  | 2.623714000  | 1 | -3.131861000 | 0.977825000  | 0.707210000  |
| 6  | -0.996442000 | 2.812282000  | 3.692399000  | 1 | -2.524656000 | 2.031996000  | -0.551547000 |
| 1  | -0.176665000 | 2.096320000  | 3.542002000  | 6 | -8.716207000 | 6.935032000  | -6.256530000 |
| 8  | -1.898720000 | 2.740824000  | 2.585384000  | 1 | -8.997353000 | 6.037982000  | -6.820501000 |
| 1  | -2.385100000 | 1.884832000  | 2.620024000  | 1 | -9.460022000 | 7.713734000  | -6.463564000 |
| 6  | -1.688116000 | 2.511697000  | 5.023515000  | 1 | -8.770243000 | 6.688352000  | -5.189561000 |
| 1  | -0.979446000 | 2.584158000  | 5.855777000  | 6 | -7.301109000 | 7.405878000  | -6.640748000 |
| 1  | -2.089330000 | 1.492745000  | 5.021123000  | 6 | -6.234014000 | 6.362678000  | -6.377651000 |
| 1  | -2.518027000 | 3.203993000  | 5.203470000  | 6 | -5.546724000 | 6.313378000  | -5.157265000 |
| 6  | -1.300393000 | 5.409731000  | 3.902392000  | 6 | -5.920617000 | 5.385855000  | -7.335695000 |
| 8  | -0.977231000 | 6.331837000  | 4.656075000  | 6 | -4.590475000 | 5.330440000  | -4.891018000 |
| 7  | -2.463731000 | 5.359806000  | 3.211223000  | 6 | -4.971764000 | 4.395730000  | -7.088628000 |
| 1  | -2.648332000 | 4.506146000  | 2.683949000  | 6 | -4.299581000 | 4.355383000  | -5.857994000 |
| 6  | -3.381759000 | 6.478455000  | 3.118362000  | 8 | -3.386408000 | 3.367571000  | -5.659393000 |
| 1  | -2.961363000 | 7.279388000  | 3.730598000  | 1 | -3.041669000 | 3.399454000  | -4.732149000 |
| 6  | -3.531693000 | 6.960634000  | 1.641002000  | 1 | -7.065378000 | 8.321288000  | -6.082926000 |
| 1  | -4.261156000 | 7.781918000  | 1.634579000  | 1 | -7.293826000 | 7.679466000  | -7.703883000 |
| 1  | -3.982490000 | 6.137527000  | 1.073911000  | 1 | -5.753446000 | 7.064751000  | -4.397289000 |
| 6  | -2.247109000 | 7.387346000  | 0.998646000  | 1 | -6.429244000 | 5.400728000  | -8.297854000 |
| 6  | -1.457271000 | 6.621013000  | 0.165877000  | 1 | -4.057519000 | 5.320359000  | -3.944254000 |
| 7  | -0.343858000 | 7.325970000  | -0.225889000 | 1 | -4.737288000 | 3.645791000  | -7.838855000 |
| 1  | -1.608161000 | 5.604726000  | -0.177312000 | 8 | 1.781226000  | 6.282223000  | -1.794461000 |
| 1  | 0.395122000  | 6.984853000  | -0.857048000 | 8 | 3.254042000  | 7.754077000  | -0.959576000 |
| 6  | -1.573092000 | 8.655067000  | 1.134425000  | 6 | 2.865669000  | 6.593757000  | -1.151921000 |
| 6  | -0.381721000 | 8.573738000  | 0.354039000  | 6 | 3.646593000  | 5.408560000  | -0.555419000 |
| 6  | -1.846247000 | 9.850976000  | 1.826718000  | 1 | 3.041036000  | 5.023905000  | 0.279436000  |
| 6  | 0.531921000  | 9.632886000  | 0.262608000  | 1 | 3.689133000  | 4.598081000  | -1.294151000 |
| 6  | -0.947704000 | 10.908404000 | 1.731982000  | 6 | 5.046377000  | 5.760599000  | -0.046962000 |



|   |              |              |              |   |              |              |              |
|---|--------------|--------------|--------------|---|--------------|--------------|--------------|
| 6 | -0.875083000 | -0.956918000 | 3.235368000  | 1 | -1.859000000 | -0.613312000 | -1.320803000 |
| 1 | 0.171082000  | -1.262545000 | 3.097946000  | 6 | -8.069028000 | 6.417317000  | -2.719781000 |
| 8 | -1.542852000 | -0.964232000 | 1.971611000  | 1 | -8.384153000 | 6.210487000  | -3.749293000 |
| 1 | -1.725360000 | -1.891562000 | 1.695903000  | 1 | -8.787004000 | 7.119070000  | -2.278437000 |
| 6 | -1.531941000 | -1.890995000 | 4.252112000  | 1 | -8.125542000 | 5.477306000  | -2.158649000 |
| 1 | -1.007480000 | -1.844880000 | 5.212752000  | 6 | -6.641252000 | 6.992324000  | -2.686858000 |
| 1 | -1.486303000 | -2.927446000 | 3.900914000  | 6 | -5.613554000 | 6.052721000  | -3.283177000 |
| 1 | -2.584276000 | -1.630721000 | 4.410254000  | 6 | -5.097011000 | 4.982091000  | -2.539444000 |
| 6 | -2.212524000 | 1.145829000  | 4.032826000  | 6 | -5.172319000 | 6.193421000  | -4.606850000 |
| 8 | -2.379297000 | 1.798392000  | 5.067936000  | 6 | -4.186110000 | 4.079927000  | -3.087955000 |
| 7 | -3.161511000 | 0.947434000  | 3.089350000  | 6 | -4.259503000 | 5.303152000  | -5.172799000 |
| 1 | -2.922481000 | 0.302194000  | 2.335522000  | 6 | -3.760694000 | 4.233954000  | -4.416982000 |
| 6 | -4.458838000 | 1.595901000  | 3.102532000  | 8 | -2.869464000 | 3.386476000  | -5.005609000 |
| 1 | -4.432956000 | 2.332468000  | 3.908963000  | 1 | -2.677072000 | 2.623708000  | -4.396779000 |
| 6 | -4.741607000 | 2.304202000  | 1.743667000  | 1 | -6.374025000 | 7.221102000  | -1.646715000 |
| 1 | -5.748927000 | 2.738287000  | 1.802101000  | 1 | -6.625348000 | 7.946260000  | -3.289980000 |
| 1 | -4.780451000 | 1.528612000  | 0.969465000  | 1 | -5.403524000 | 4.851368000  | -1.503220000 |
| 6 | -3.729834000 | 3.349338000  | 1.386218000  | 1 | -5.548988000 | 7.017751000  | -5.209569000 |
| 6 | -2.651659000 | 3.187536000  | 0.539722000  | 1 | -3.792581000 | 3.263791000  | -2.489493000 |
| 7 | -1.900641000 | 4.337067000  | 0.490450000  | 1 | -3.923981000 | 5.423937000  | -6.199196000 |
| 1 | -2.351084000 | 2.317312000  | -0.030537000 | 8 | 0.564936000  | 4.528067000  | -0.852720000 |
| 1 | -1.045256000 | 4.468558000  | -0.070269000 | 8 | 1.246700000  | 6.073395000  | 0.623545000  |
| 6 | -3.635450000 | 4.692875000  | 1.901793000  | 6 | 1.362331000  | 4.970091000  | 0.070162000  |
| 6 | -2.470382000 | 5.275557000  | 1.319727000  | 6 | 2.459097000  | 3.991689000  | 0.529703000  |
| 6 | -4.404622000 | 5.466278000  | 2.793408000  | 1 | 1.952635000  | 3.220582000  | 1.130442000  |
| 6 | -2.054561000 | 6.580837000  | 1.617328000  | 1 | 2.865307000  | 3.466813000  | -0.343340000 |
| 6 | -4.002299000 | 6.765778000  | 3.082624000  | 6 | 3.571608000  | 4.633774000  | 1.364906000  |
| 6 | -2.835277000 | 7.315340000  | 2.504799000  | 1 | 3.104684000  | 5.295409000  | 2.099195000  |
| 1 | -5.301238000 | 5.055632000  | 3.252961000  | 1 | 4.188545000  | 5.291828000  | 0.736122000  |
| 1 | -4.589382000 | 7.369455000  | 3.770349000  | 6 | 4.441995000  | 3.624164000  | 2.130275000  |
| 1 | -2.542079000 | 8.330510000  | 2.760122000  | 1 | 3.813990000  | 3.039670000  | 2.810645000  |
| 1 | -1.141031000 | 6.975267000  | 1.181428000  | 1 | 5.162532000  | 4.161056000  | 2.763460000  |
| 6 | -5.563787000 | 0.561454000  | 3.347720000  | 6 | 5.245224000  | 2.610156000  | 1.324916000  |
| 8 | -5.644493000 | -0.459083000 | 2.645186000  | 8 | 5.574841000  | 1.514383000  | 1.825306000  |
| 7 | -6.456660000 | 0.863407000  | 4.311467000  | 7 | 5.603899000  | 2.959037000  | 0.075157000  |
| 1 | -6.302897000 | 1.697411000  | 4.862857000  | 1 | 5.299611000  | 3.856771000  | -0.277381000 |
| 6 | -7.643407000 | 0.060183000  | 4.600498000  | 6 | 6.384803000  | 2.119055000  | -0.824571000 |
| 1 | -8.452316000 | 0.751780000  | 4.855746000  | 1 | 5.767186000  | 1.842518000  | -1.685687000 |
| 1 | -7.923723000 | -0.445314000 | 3.673413000  | 1 | 6.631096000  | 1.210022000  | -0.274033000 |
| 6 | -7.452096000 | -0.941995000 | 5.750630000  | 6 | 7.675151000  | 2.813475000  | -1.306344000 |
| 1 | -7.158515000 | -0.387575000 | 6.650818000  | 1 | 8.225556000  | 2.085796000  | -1.915373000 |
| 1 | -8.433756000 | -1.385247000 | 5.969672000  | 1 | 8.299657000  | 3.046571000  | -0.436059000 |
| 6 | -6.429833000 | -2.059796000 | 5.501048000  | 6 | 7.415114000  | 4.069430000  | -2.113763000 |
| 1 | -6.292007000 | -2.622978000 | 6.432723000  | 6 | 7.035953000  | 3.983755000  | -3.463149000 |
| 1 | -5.452465000 | -1.631546000 | 5.249639000  | 6 | 7.508775000  | 5.340296000  | -1.528090000 |
| 6 | -6.860991000 | -3.038536000 | 4.399293000  | 6 | 6.755876000  | 5.132895000  | -4.203495000 |
| 1 | -7.838271000 | -3.470317000 | 4.640269000  | 6 | 7.229299000  | 6.494397000  | -2.266454000 |
| 1 | -6.964742000 | -2.529292000 | 3.439072000  | 6 | 6.851084000  | 6.393772000  | -3.606586000 |
| 7 | -5.934220000 | -4.156082000 | 4.225483000  | 1 | 6.958960000  | 3.006520000  | -3.934061000 |
| 1 | -5.971968000 | -4.888451000 | 4.921946000  | 1 | 7.810793000  | 5.426800000  | -0.486693000 |
| 6 | -4.865203000 | -4.173540000 | 3.401475000  | 1 | 6.460600000  | 5.042872000  | -5.245767000 |
| 7 | -4.591489000 | -3.158166000 | 2.583856000  | 1 | 7.310103000  | 7.469768000  | -1.793714000 |
| 1 | -5.015420000 | -2.236755000 | 2.690013000  | 1 | 6.634011000  | 7.289397000  | -4.182514000 |
| 1 | -3.764067000 | -3.240267000 | 1.971647000  | 7 | 1.034942000  | 2.461924000  | -2.404658000 |
| 7 | -4.076187000 | -5.258133000 | 3.389809000  | 1 | 1.045035000  | 1.605922000  | -1.831999000 |
| 1 | -4.392076000 | -6.107307000 | 3.836103000  | 1 | 1.941774000  | 2.573028000  | -2.877288000 |
| 1 | -3.271875000 | -5.325971000 | 2.735735000  | 1 | 0.882202000  | 3.306331000  | -1.719950000 |
| 6 | -7.953612000 | 0.052560000  | -2.415894000 | 6 | -0.093743000 | 2.309897000  | -3.371673000 |
| 1 | -8.611184000 | 0.557560000  | -1.700531000 | 1 | -0.519724000 | 3.300262000  | -3.545552000 |
| 1 | -8.324695000 | -0.971342000 | -2.546910000 | 6 | -1.166469000 | 1.408434000  | -2.718626000 |
| 1 | -8.048442000 | 0.568512000  | -3.378984000 | 8 | -2.282309000 | 1.345516000  | -3.317840000 |
| 6 | -6.501840000 | 0.059468000  | -1.921290000 | 8 | -0.832705000 | 0.793388000  | -1.678060000 |
| 1 | -6.434146000 | -0.443745000 | -0.948687000 | 6 | 0.376516000  | 1.702540000  | -4.713206000 |
| 1 | -6.160240000 | 1.090722000  | -1.767310000 | 1 | -0.528790000 | 1.414387000  | -5.257478000 |
| 6 | -5.550202000 | -0.626584000 | -2.914691000 | 1 | 0.922171000  | 0.772729000  | -4.514295000 |
| 1 | -5.906558000 | -1.637451000 | -3.151947000 | 6 | 1.197649000  | 2.641462000  | -5.557661000 |
| 1 | -5.543129000 | -0.082062000 | -3.863594000 | 6 | 0.715140000  | 3.832967000  | -6.094649000 |
| 7 | -4.159653000 | -0.687408000 | -2.465229000 | 1 | -0.269456000 | 4.272135000  | -6.012242000 |
| 1 | -3.516964000 | 0.058395000  | -2.768790000 | 7 | 1.703556000  | 4.427031000  | -6.827988000 |
| 6 | -3.674780000 | -1.560863000 | -1.573971000 | 1 | 1.599920000  | 5.284399000  | -7.352410000 |
| 7 | -2.416455000 | -1.463069000 | -1.147986000 | 6 | 2.834860000  | 3.640164000  | -6.805653000 |
| 1 | -3.972447000 | -3.241804000 | -0.488093000 | 6 | 2.543561000  | 2.518849000  | -5.998943000 |
| 1 | -5.262573000 | -2.867487000 | -1.572887000 | 6 | 3.582180000  | 1.490811000  | -5.778950000 |
| 7 | -4.443270000 | -2.557376000 | -1.072476000 | 6 | 4.764725000  | 1.624622000  | -6.684470000 |
| 1 | -2.119288000 | -2.120889000 | -0.423159000 | 6 | 4.039531000  | 3.808943000  | -7.511402000 |

|                                 |              |              |              |   |              |              |              |
|---------------------------------|--------------|--------------|--------------|---|--------------|--------------|--------------|
| 6                               | 4.977825000  | 2.749654000  | -7.444108000 | 1 | 6.924243000  | 5.231025000  | 5.259150000  |
| 1                               | 3.209347000  | 0.462674000  | -5.726423000 | 6 | 5.044308000  | 5.151382000  | 6.284119000  |
| 1                               | 5.488783000  | 0.818225000  | -6.668731000 | 8 | 4.972838000  | 5.870720000  | 7.282866000  |
| 1                               | 4.219615000  | 4.682722000  | -8.128530000 | 7 | 4.005712000  | 4.933169000  | 5.445472000  |
| 1                               | 5.882901000  | 2.815699000  | -8.041589000 | 1 | 4.102622000  | 4.300379000  | 4.659242000  |
| 7                               | 4.209460000  | 1.601509000  | -4.258628000 | 6 | 2.673421000  | 5.457537000  | 5.676982000  |
| 8                               | 3.786251000  | 2.459466000  | -3.485428000 | 1 | 2.384247000  | 5.249103000  | 6.714511000  |
| 8                               | 5.116098000  | 0.826677000  | -3.998260000 | 6 | 2.580252000  | 7.005613000  | 5.482452000  |
| <b>2TS5<sub>B,C4-endo</sub></b> |              |              |              | 1 | 3.299321000  | 7.436948000  | 6.184398000  |
| 26                              | 2.022423000  | -2.846025000 | -1.746270000 | 1 | 1.583582000  | 7.327106000  | 5.807410000  |
| 7                               | 1.301449000  | -2.478146000 | 0.117964000  | 6 | 2.848839000  | 7.488819000  | 4.074900000  |
| 7                               | 3.916932000  | -2.753821000 | -1.054202000 | 6 | 4.156384000  | 7.768463000  | 3.650603000  |
| 7                               | 2.740316000  | -3.421997000 | -3.550641000 | 6 | 1.798087000  | 7.657657000  | 3.159649000  |
| 7                               | 0.127953000  | -3.152830000 | -2.392078000 | 6 | 4.409605000  | 8.191467000  | 2.343512000  |
| 6                               | -0.004364000 | -2.508598000 | 0.529986000  | 6 | 2.047266000  | 8.075071000  | 1.850343000  |
| 6                               | -0.100085000 | -2.155156000 | 1.943479000  | 6 | 3.355661000  | 8.341548000  | 1.438190000  |
| 6                               | 1.178936000  | -1.909024000 | 2.349563000  | 1 | 4.979129000  | 7.665222000  | 4.353548000  |
| 6                               | 2.044598000  | -2.132649000 | 1.213331000  | 1 | 0.775908000  | 7.464603000  | 3.478307000  |
| 6                               | 4.292103000  | -2.407329000 | 0.217898000  | 1 | 5.428820000  | 8.409095000  | 2.034686000  |
| 6                               | 5.728782000  | -4.492641000 | 0.349777000  | 1 | 1.222730000  | 8.191903000  | 1.152171000  |
| 6                               | 6.212035000  | -2.903168000 | -0.857305000 | 1 | 3.550577000  | 8.668855000  | 0.420628000  |
| 6                               | 5.070529000  | -3.059449000 | -1.729299000 | 6 | 1.724622000  | 4.713528000  | 4.726599000  |
| 6                               | 4.047595000  | -3.656886000 | -3.891545000 | 8 | 2.154254000  | 4.073399000  | 3.761830000  |
| 6                               | 4.130721000  | -4.127092000 | -5.254866000 | 7 | 0.402643000  | 4.822474000  | 4.999306000  |
| 6                               | 2.856770000  | -4.161422000 | -5.735140000 | 1 | 0.086512000  | 5.502472000  | 5.683324000  |
| 6                               | 1.993868000  | -3.729067000 | -4.659005000 | 6 | -0.596708000 | 4.426903000  | 4.022371000  |
| 6                               | -0.254827000 | -3.459984000 | -3.670910000 | 1 | -0.164090000 | 4.556294000  | 3.021816000  |
| 6                               | -1.694799000 | -3.583589000 | -3.740162000 | 6 | -0.973326000 | 2.921217000  | 4.113897000  |
| 6                               | -2.166128000 | -3.372462000 | -2.480353000 | 1 | -0.023891000 | 2.370459000  | 4.116248000  |
| 6                               | -1.016854000 | -3.100940000 | -1.645600000 | 8 | -1.673856000 | 2.628102000  | 2.897215000  |
| 6                               | -1.085698000 | -2.826142000 | -0.283308000 | 1 | -2.402310000 | 1.974553000  | 3.033845000  |
| 6                               | 3.432584000  | -2.077612000 | 1.261494000  | 6 | -1.760697000 | 2.548140000  | 5.366561000  |
| 6                               | 5.141711000  | -3.486670000 | -3.050631000 | 1 | -1.191866000 | 2.818040000  | 6.262659000  |
| 6                               | 0.604770000  | -3.706086000 | -4.735517000 | 1 | -1.942573000 | 1.468466000  | 5.397278000  |
| 1                               | -2.071938000 | -2.837724000 | 0.168085000  | 1 | -2.728725000 | 3.059288000  | 5.396610000  |
| 1                               | 3.886126000  | -1.809109000 | 2.210485000  | 6 | -1.782695000 | 5.406417000  | 4.128620000  |
| 1                               | 6.124883000  | -3.711236000 | -3.453212000 | 8 | -1.726085000 | 6.429689000  | 4.822872000  |
| 1                               | 0.154682000  | -3.965404000 | -5.689202000 | 7 | -2.840469000 | 5.071497000  | 3.362161000  |
| 1                               | 1.515788000  | -1.588059000 | 3.328827000  | 1 | -2.738953000 | 4.201039000  | 2.840409000  |
| 1                               | 6.276602000  | -2.280065000 | 1.259306000  | 6 | -3.902256000 | 6.002172000  | 3.002364000  |
| 1                               | 7.238163000  | -3.098413000 | -1.143579000 | 1 | -3.491755000 | 7.012553000  | 3.093960000  |
| 1                               | 5.051989000  | -4.386575000 | -5.761673000 | 6 | -4.330521000 | 5.749355000  | 1.534306000  |
| 1                               | 2.511990000  | -4.461313000 | -6.717016000 | 1 | -5.118468000 | 6.469258000  | 1.282912000  |
| 1                               | -2.250349000 | -3.816540000 | -4.640140000 | 1 | -4.791153000 | 4.755951000  | 1.482668000  |
| 1                               | -3.190762000 | -3.385753000 | -2.130512000 | 6 | -3.166393000 | 5.860327000  | 0.590147000  |
| 6                               | -1.366765000 | -1.997020000 | 2.739247000  | 6 | -2.281317000 | 4.851649000  | 0.266983000  |
| 6                               | -2.115197000 | -0.717970000 | 2.330502000  | 7 | -1.239883000 | 5.335346000  | -0.487399000 |
| 6                               | -3.272887000 | -0.277205000 | 3.226233000  | 1 | -2.301864000 | 3.805629000  | 0.543506000  |
| 8                               | -3.782246000 | 0.872810000  | 2.907267000  | 1 | -0.388364000 | 4.787308000  | -0.694143000 |
| 8                               | -3.649316000 | -0.969733000 | 4.191394000  | 6 | -2.630625000 | 7.059507000  | -0.005836000 |
| 1                               | -1.119124000 | -1.944999000 | 3.804571000  | 6 | -1.415196000 | 6.690377000  | -0.659171000 |
| 1                               | -2.025007000 | -2.866150000 | 2.615649000  | 6 | -3.044702000 | 8.405422000  | -0.054860000 |
| 1                               | -1.410778000 | 0.121532000  | 2.289162000  | 6 | -0.611961000 | 7.624355000  | -1.328110000 |
| 1                               | -2.500949000 | -0.815455000 | 1.308701000  | 6 | -2.256316000 | 9.331981000  | -0.729268000 |
| 16                              | 2.009584000  | -5.243922000 | -1.091961000 | 6 | -1.048273000 | 8.945740000  | -1.354235000 |
| 1                               | 3.173461000  | -5.602588000 | -1.679659000 | 1 | -3.967036000 | 8.719693000  | 0.429139000  |
| 8                               | 1.917052000  | -1.164512000 | -2.110256000 | 1 | -2.566868000 | 10.373110000 | -0.770125000 |
| 7                               | 3.695628000  | 1.541939000  | 3.422656000  | 1 | -0.448370000 | 9.696298000  | -1.862646000 |
| 1                               | 4.615573000  | 1.814713000  | 3.093151000  | 1 | 0.321059000  | 7.308128000  | -1.782661000 |
| 1                               | 2.928542000  | 2.160225000  | 3.180540000  | 6 | -5.076618000 | 5.844488000  | 3.986562000  |
| 6                               | 3.511213000  | 0.728311000  | 4.494008000  | 8 | -5.962403000 | 4.989631000  | 3.819668000  |
| 8                               | 2.393291000  | 0.516649000  | 4.973655000  | 7 | -5.055019000 | 6.695961000  | 5.033188000  |
| 6                               | 4.750469000  | 0.031887000  | 5.060586000  | 1 | -4.227410000 | 7.270704000  | 5.146491000  |
| 1                               | 4.516757000  | -0.207304000 | 6.100852000  | 6 | -6.083395000 | 6.740221000  | 6.070409000  |
| 1                               | 4.872423000  | -0.922941000 | 4.532602000  | 1 | -6.277438000 | 7.793603000  | 6.298293000  |
| 6                               | 6.072084000  | 0.817878000  | 4.991178000  | 1 | -6.993169000 | 6.328050000  | 5.628448000  |
| 1                               | 6.369962000  | 1.023124000  | 3.959559000  | 6 | -5.711437000 | 6.006376000  | 7.370440000  |
| 1                               | 6.859869000  | 0.194000000  | 5.430533000  | 1 | -4.816307000 | 6.476433000  | 7.796837000  |
| 6                               | 6.022910000  | 2.099464000  | 5.819363000  | 1 | -6.523245000 | 6.181467000  | 8.089994000  |
| 8                               | 5.760279000  | 2.083668000  | 7.024040000  | 6 | -5.453824000 | 4.498067000  | 7.235883000  |
| 7                               | 6.299372000  | 3.256537000  | 5.153792000  | 1 | -5.098443000 | 4.115085000  | 8.200635000  |
| 1                               | 6.464173000  | 3.235886000  | 4.147395000  | 1 | -4.644503000 | 4.323848000  | 6.516484000  |
| 6                               | 6.382180000  | 4.509470000  | 5.879478000  | 6 | -6.692696000 | 3.690236000  | 6.816450000  |
| 1                               | 6.942520000  | 4.368686000  | 6.806764000  | 1 | -7.508919000 | 3.847311000  | 7.528163000  |
|                                 |              |              |              | 1 | -7.057811000 | 4.011734000  | 5.838358000  |



|    |              |              |              |   |              |              |              |
|----|--------------|--------------|--------------|---|--------------|--------------|--------------|
| 6  | -3.302597000 | -0.219387000 | 3.210903000  | 1 | -0.226272000 | 4.935628000  | -0.568801000 |
| 8  | -3.792469000 | 0.928548000  | 2.860098000  | 6 | -2.513769000 | 7.200199000  | -0.006994000 |
| 8  | -3.704126000 | -0.891977000 | 4.181097000  | 6 | -1.272726000 | 6.832037000  | -0.611234000 |
| 1  | -1.196500000 | -1.923760000 | 3.868170000  | 6 | -2.929047000 | 8.544739000  | -0.077554000 |
| 1  | -2.130005000 | -2.836621000 | 2.694118000  | 6 | -0.447409000 | 7.765107000  | -1.253962000 |
| 1  | -1.402311000 | 0.122481000  | 2.326944000  | 6 | -2.117378000 | 9.470772000  | -0.725186000 |
| 1  | -2.489609000 | -0.792618000 | 1.322947000  | 6 | -0.885519000 | 9.085233000  | -1.302118000 |
| 16 | 1.886390000  | -5.280499000 | -1.100196000 | 1 | -3.869899000 | 8.858704000  | 0.369726000  |
| 1  | 3.048181000  | -5.657381000 | -1.681290000 | 1 | -2.428276000 | 10.511151000 | -0.781247000 |
| 8  | 1.892249000  | -1.115987000 | -2.060088000 | 1 | -0.269682000 | 9.835048000  | -1.792308000 |
| 7  | 3.675634000  | 1.565953000  | 3.364676000  | 1 | 0.502051000  | 7.447853000  | -1.673400000 |
| 1  | 4.608447000  | 1.824033000  | 3.059607000  | 6 | -5.059379000 | 5.948131000  | 3.918506000  |
| 1  | 2.929278000  | 2.208025000  | 3.118663000  | 8 | -5.913405000 | 5.062028000  | 3.750701000  |
| 6  | 3.450986000  | 0.743505000  | 4.421496000  | 7 | -5.096610000 | 6.828182000  | 4.941133000  |
| 8  | 2.319399000  | 0.551213000  | 4.876820000  | 1 | -4.299715000 | 7.443232000  | 5.056936000  |
| 6  | 4.661569000  | 0.010882000  | 5.004653000  | 6 | -6.148652000 | 6.857799000  | 5.954677000  |
| 1  | 4.399704000  | -0.236345000 | 6.036321000  | 1 | -6.384503000 | 7.908028000  | 6.155852000  |
| 1  | 4.772749000  | -0.939570000 | 4.466537000  | 1 | -7.033651000 | 6.404058000  | 5.503295000  |
| 6  | 6.002686000  | 0.765621000  | 4.975152000  | 6 | -5.775530000 | 6.164499000  | 7.276303000  |
| 1  | 6.329376000  | 0.975417000  | 3.953336000  | 1 | -4.904097000 | 6.673757000  | 7.706849000  |
| 1  | 6.764906000  | 0.118012000  | 5.425240000  | 1 | -6.604721000 | 6.327282000  | 7.978770000  |
| 6  | 5.965343000  | 2.039027000  | 5.816639000  | 6 | -5.466288000 | 4.663138000  | 7.179091000  |
| 8  | 5.671516000  | 2.017174000  | 7.014057000  | 1 | -5.111183000 | 4.313721000  | 8.156610000  |
| 7  | 6.291557000  | 3.194578000  | 5.171672000  | 1 | -4.642789000 | 4.498351000  | 6.473661000  |
| 1  | 6.474725000  | 3.181206000  | 4.168417000  | 6 | -6.674438000 | 3.808138000  | 6.764693000  |
| 6  | 6.386158000  | 4.438577000  | 5.910667000  | 1 | -7.504041000 | 3.959791000  | 7.462327000  |
| 1  | 6.918615000  | 4.275922000  | 6.850687000  | 1 | -7.036267000 | 4.094692000  | 5.774621000  |
| 1  | 6.961889000  | 5.151604000  | 5.311138000  | 7 | -6.390605000 | 2.370946000  | 6.761230000  |
| 6  | 5.054831000  | 5.110027000  | 6.287388000  | 1 | -6.452909000 | 1.897310000  | 7.652441000  |
| 8  | 4.976118000  | 5.820468000  | 7.292030000  | 6 | -5.758037000 | 1.702056000  | 5.772670000  |
| 7  | 4.031408000  | 4.926832000  | 5.421858000  | 7 | -5.527354000 | 2.263385000  | 4.585865000  |
| 1  | 4.128655000  | 4.298306000  | 4.632233000  | 1 | -5.720748000 | 3.245884000  | 4.396601000  |
| 6  | 2.706239000  | 5.475537000  | 5.637829000  | 1 | -4.940020000 | 1.746102000  | 3.906043000  |
| 1  | 2.402788000  | 5.268360000  | 6.671586000  | 7 | -5.414627000 | 0.419682000  | 5.965707000  |
| 6  | 2.645111000  | 7.025676000  | 5.454445000  | 1 | -5.475245000 | 0.024023000  | 6.892704000  |
| 1  | 3.353837000  | 7.437715000  | 6.178278000  | 1 | -4.824178000 | -0.077908000 | 5.270115000  |
| 1  | 1.646477000  | 7.361973000  | 5.757686000  | 6 | -8.160258000 | 3.212724000  | -3.832407000 |
| 6  | 2.958024000  | 7.519672000  | 4.060283000  | 1 | -8.510942000 | 4.239743000  | -3.976951000 |
| 6  | 4.280554000  | 7.783922000  | 3.674205000  | 1 | -8.961725000 | 2.649223000  | -3.339511000 |
| 6  | 1.933768000  | 7.721377000  | 3.122122000  | 1 | -7.999966000 | 2.770658000  | -4.823045000 |
| 6  | 4.573845000  | 8.225853000  | 2.381918000  | 6 | -6.869577000 | 3.190225000  | -3.000421000 |
| 6  | 2.222913000  | 8.159338000  | 1.827807000  | 1 | -7.051550000 | 3.669651000  | -2.028526000 |
| 6  | 3.545579000  | 8.411752000  | 1.454112000  | 1 | -6.087948000 | 3.783343000  | -3.490521000 |
| 1  | 5.083142000  | 7.654635000  | 4.395934000  | 6 | -6.347255000 | 1.758782000  | -2.788850000 |
| 1  | 0.900906000  | 7.538588000  | 3.411268000  | 1 | -7.122019000 | 1.132150000  | -2.331033000 |
| 1  | 5.604028000  | 8.431608000  | 2.102665000  | 1 | -6.109561000 | 1.308213000  | -3.757263000 |
| 1  | 1.418004000  | 8.303447000  | 1.112230000  | 7 | -5.130391000 | 1.664437000  | -1.975441000 |
| 1  | 3.771585000  | 8.754597000  | 0.448171000  | 1 | -4.223167000 | 1.608771000  | -2.458261000 |
| 6  | 1.752414000  | 4.750055000  | 4.679605000  | 6 | -5.118006000 | 1.522587000  | -0.642761000 |
| 8  | 2.177896000  | 4.104045000  | 3.717435000  | 7 | -3.992615000 | 1.211922000  | -0.008025000 |
| 7  | 0.431325000  | 4.876512000  | 4.947637000  | 1 | -6.198390000 | 1.602056000  | 1.075853000  |
| 1  | 0.123716000  | 5.566204000  | 5.625825000  | 1 | -6.996537000 | 2.259610000  | -0.281781000 |
| 6  | -0.573876000 | 4.489872000  | 3.972756000  | 7 | -6.267806000 | 1.654373000  | 0.068042000  |
| 1  | -0.140251000 | 4.605213000  | 2.970505000  | 1 | -3.953097000 | 1.160271000  | 1.018758000  |
| 6  | -0.973479000 | 2.990976000  | 4.077746000  | 1 | -3.188518000 | 0.857608000  | -0.550475000 |
| 1  | -0.033229000 | 2.424408000  | 4.076280000  | 6 | -5.599791000 | 8.694421000  | -4.698607000 |
| 8  | -1.690479000 | 2.701927000  | 2.869188000  | 1 | -6.028348000 | 8.338850000  | -5.643142000 |
| 1  | -2.405550000 | 2.035395000  | 3.008375000  | 1 | -5.908034000 | 9.737519000  | -4.557053000 |
| 6  | -1.756640000 | 2.639715000  | 5.339491000  | 1 | -6.038007000 | 8.099094000  | -3.888985000 |
| 1  | -1.174980000 | 2.904213000  | 6.228946000  | 6 | -4.066180000 | 8.565556000  | -4.707156000 |
| 1  | -1.957451000 | 1.563583000  | 5.378531000  | 6 | -3.595645000 | 7.138430000  | -4.897944000 |
| 1  | -2.714836000 | 3.168572000  | 5.375011000  | 6 | -3.489197000 | 6.261559000  | -3.809159000 |
| 6  | -1.741499000 | 5.492636000  | 4.077083000  | 6 | -3.285612000 | 6.633825000  | -6.169371000 |
| 8  | -1.652695000 | 6.527924000  | 4.748468000  | 6 | -3.089775000 | 4.934686000  | -3.973338000 |
| 7  | -2.820543000 | 5.162100000  | 3.337433000  | 6 | -2.882580000 | 5.311632000  | -6.353709000 |
| 1  | -2.744475000 | 4.279205000  | 2.832305000  | 6 | -2.779781000 | 4.448568000  | -5.253701000 |
| 6  | -3.861614000 | 6.111275000  | 2.966396000  | 8 | -2.367665000 | 3.170489000  | -5.473245000 |
| 1  | -3.439144000 | 7.113570000  | 3.084174000  | 1 | -2.351770000 | 2.664387000  | -4.618314000 |
| 6  | -4.258328000 | 5.889089000  | 1.483199000  | 1 | -3.668868000 | 8.960972000  | -3.763288000 |
| 1  | -5.030240000 | 6.623885000  | 1.224824000  | 1 | -3.658123000 | 9.197576000  | -5.506456000 |
| 1  | -4.730430000 | 4.902799000  | 1.405083000  | 1 | -3.705879000 | 6.623649000  | -2.806281000 |
| 6  | -3.068135000 | 6.001207000  | 0.572564000  | 1 | -3.353674000 | 7.290515000  | -7.034875000 |
| 6  | -2.166862000 | 4.995004000  | 0.287846000  | 1 | -3.000246000 | 4.276130000  | -3.114238000 |
| 7  | -1.098847000 | 5.478439000  | -0.428019000 | 1 | -2.635508000 | 4.934371000  | -7.342237000 |
| 1  | -2.192927000 | 3.950459000  | 0.569573000  | 8 | 1.145357000  | 3.783578000  | -0.281961000 |

|                                 |              |              |              |    |              |              |              |
|---------------------------------|--------------|--------------|--------------|----|--------------|--------------|--------------|
| 8                               | 2.172305000  | 5.623339000  | -1.072272000 | 6  | 6.050311000  | -5.661022000 | 2.103249000  |
| 6                               | 2.159070000  | 4.564573000  | -0.411555000 | 6  | 5.311873000  | -5.436280000 | 0.878937000  |
| 6                               | 3.409315000  | 4.159921000  | 0.387168000  | 6  | 5.127559000  | -5.436254000 | -1.582348000 |
| 1                               | 3.237980000  | 4.484404000  | 1.423832000  | 6  | 5.676526000  | -5.659009000 | -2.901654000 |
| 1                               | 3.465877000  | 3.066064000  | 0.412676000  | 6  | 4.684234000  | -5.378995000 | -3.791401000 |
| 6                               | 4.711501000  | 4.761750000  | -0.139898000 | 6  | 3.530130000  | -4.981392000 | -3.015321000 |
| 1                               | 4.579251000  | 5.841500000  | -0.258250000 | 6  | 1.193843000  | -4.194670000 | -2.838664000 |
| 1                               | 4.913624000  | 4.370290000  | -1.144240000 | 6  | -0.060406000 | -3.787977000 | -3.433658000 |
| 6                               | 5.912970000  | 4.520990000  | 0.792355000  | 6  | -0.890672000 | -3.449866000 | -2.402394000 |
| 1                               | 5.746385000  | 5.016119000  | 1.754143000  | 6  | -0.143719000 | -3.657881000 | -1.182560000 |
| 1                               | 6.817663000  | 4.964999000  | 0.353468000  | 6  | -0.655178000 | -3.441034000 | 0.095004000  |
| 6                               | 6.226084000  | 3.064590000  | 1.108629000  | 6  | 2.818207000  | -4.605614000 | 3.255827000  |
| 8                               | 6.413997000  | 2.676403000  | 2.282124000  | 6  | 5.829703000  | -5.627107000 | -0.396489000 |
| 7                               | 6.317403000  | 2.217428000  | 0.064804000  | 6  | 2.308888000  | -4.604212000 | -3.563781000 |
| 1                               | 6.083539000  | 2.547945000  | -0.866446000 | 1  | -1.679509000 | -3.089244000 | 0.158524000  |
| 6                               | 6.680129000  | 0.810765000  | 0.207132000  | 1  | 2.894435000  | -4.618361000 | 4.338622000  |
| 1                               | 6.108405000  | 0.240062000  | -0.529577000 | 1  | 6.860830000  | -5.958489000 | -0.473382000 |
| 1                               | 6.370495000  | 0.479759000  | 1.199961000  | 1  | 2.219119000  | -4.627721000 | -4.645862000 |
| 6                               | 8.190371000  | 0.552095000  | 0.020876000  | 1  | 0.443337000  | -3.729388000 | 4.568257000  |
| 1                               | 8.363777000  | -0.514323000 | 0.212917000  | 1  | 5.387766000  | -5.430844000 | 4.194906000  |
| 1                               | 8.736094000  | 1.112248000  | 0.788669000  | 1  | 7.080775000  | -5.990890000 | 2.148802000  |
| 6                               | 8.701687000  | 0.921081000  | -1.356123000 | 1  | 6.688745000  | -5.989004000 | -3.099822000 |
| 6                               | 8.453986000  | 0.086720000  | -2.457838000 | 1  | 4.711437000  | -5.429739000 | -4.872833000 |
| 6                               | 9.405159000  | 2.114270000  | -1.571150000 | 1  | -0.269052000 | -3.788812000 | -4.496766000 |
| 6                               | 8.897699000  | 0.434184000  | -3.735371000 | 1  | -1.917717000 | -3.109020000 | -2.446690000 |
| 6                               | 9.850307000  | 2.467339000  | -2.848174000 | 6  | -1.870113000 | -2.849831000 | 2.944602000  |
| 6                               | 9.597486000  | 1.628355000  | -3.935245000 | 6  | -1.979019000 | -1.341482000 | 2.647496000  |
| 1                               | 7.909151000  | -0.843547000 | -2.311833000 | 6  | -3.222455000 | -0.670951000 | 3.265160000  |
| 1                               | 9.608907000  | 2.771153000  | -0.728681000 | 8  | -3.576192000 | 0.452737000  | 2.693172000  |
| 1                               | 8.703493000  | -0.230463000 | -4.573443000 | 8  | -3.807539000 | -1.187520000 | 4.208404000  |
| 1                               | 10.395580000 | 3.396627000  | -2.991681000 | 1  | -2.074651000 | -3.005755000 | 4.007860000  |
| 1                               | 9.945232000  | 1.898954000  | -4.928623000 | 1  | -2.659489000 | -3.381682000 | 2.396528000  |
| 7                               | 0.647487000  | 1.243028000  | -1.293049000 | 1  | -1.103075000 | -0.821927000 | 3.061925000  |
| 1                               | -0.014763000 | 0.796413000  | -0.644098000 | 1  | -1.951397000 | -1.151297000 | 1.569389000  |
| 1                               | 1.221133000  | 0.441755000  | -1.686592000 | 16 | 1.771335000  | -6.878845000 | -0.075548000 |
| 1                               | 1.208227000  | 1.958796000  | -0.788092000 | 1  | 2.948944000  | -7.497378000 | -0.321204000 |
| 6                               | -0.203107000 | 1.978800000  | -2.280392000 | 8  | 3.131906000  | -2.926212000 | -0.186158000 |
| 1                               | -0.443917000 | 2.918098000  | -1.772788000 | 7  | 2.827275000  | 1.391660000  | 1.802326000  |
| 6                               | -1.567371000 | 1.257503000  | -2.384590000 | 1  | 3.761575000  | 1.531464000  | 1.430732000  |
| 8                               | -2.407882000 | 1.665077000  | -3.242252000 | 1  | 2.295445000  | 2.244505000  | 1.950533000  |
| 8                               | -1.800506000 | 0.402070000  | -1.491346000 | 6  | 2.544943000  | 0.356205000  | 2.639590000  |
| 6                               | 0.548752000  | 2.396616000  | -3.554505000 | 8  | 1.495396000  | 0.308570000  | 3.291138000  |
| 1                               | -0.171468000 | 2.976571000  | -4.140353000 | 6  | 3.564170000  | -0.778673000 | 2.696650000  |
| 1                               | 1.327877000  | 3.095600000  | -3.252279000 | 1  | 3.301450000  | -1.388475000 | 3.563340000  |
| 1                               | 1.120965000  | 1.323924000  | -4.450479000 | 1  | 3.437361000  | -1.405299000 | 1.803342000  |
| 6                               | 0.320294000  | 0.602930000  | -5.317090000 | 6  | 5.039172000  | -0.341214000 | 2.793193000  |
| 1                               | -0.757269000 | 0.618322000  | -5.400663000 | 1  | 5.365562000  | 0.182963000  | 1.890822000  |
| 7                               | 1.076468000  | -0.163194000 | -6.155723000 | 1  | 5.652017000  | -1.247853000 | 2.869025000  |
| 1                               | 0.718905000  | -0.780561000 | -6.869657000 | 6  | 5.329287000  | 0.486686000  | 4.043117000  |
| 6                               | 2.405586000  | 0.041518000  | -5.876186000 | 8  | 5.077188000  | 0.070450000  | 5.175660000  |
| 6                               | 2.482454000  | 0.958412000  | -4.771998000 | 7  | 5.907817000  | 1.704061000  | 3.827973000  |
| 6                               | 3.811653000  | 1.257770000  | -4.348788000 | 1  | 6.008898000  | 2.048225000  | 2.874635000  |
| 6                               | 4.925784000  | 0.753004000  | -5.025709000 | 6  | 6.298032000  | 2.546015000  | 4.942017000  |
| 6                               | 3.508922000  | -0.483688000 | -6.544557000 | 1  | 6.720566000  | 1.928552000  | 5.737085000  |
| 6                               | 4.778598000  | -0.104226000 | -6.118671000 | 1  | 7.072857000  | 3.240272000  | 4.598812000  |
| 1                               | 2.662387000  | -0.974598000 | -2.632668000 | 6  | 5.173899000  | 3.369604000  | 5.593885000  |
| 1                               | 5.911126000  | 1.009834000  | -4.658727000 | 8  | 5.208892000  | 3.645896000  | 6.794315000  |
| 1                               | 3.375358000  | -1.171666000 | -7.373122000 | 7  | 4.201374000  | 3.806891000  | 4.757855000  |
| 1                               | 5.660196000  | -0.493425000 | -6.616784000 | 1  | 4.169134000  | 3.482466000  | 3.797175000  |
| 7                               | 4.099546000  | 2.006845000  | -3.141409000 | 6  | 2.995380000  | 4.455682000  | 5.239815000  |
| 8                               | 3.199350000  | 2.155623000  | -2.310221000 | 1  | 2.661702000  | 3.933234000  | 6.144822000  |
| 8                               | 5.253903000  | 2.434861000  | -2.965226000 | 6  | 3.203319000  | 5.946842000  | 5.642555000  |
|                                 |              |              |              | 1  | 3.971154000  | 5.938927000  | 6.421625000  |
|                                 |              |              |              | 1  | 2.276613000  | 6.298416000  | 6.112400000  |
|                                 |              |              |              | 6  | 3.596052000  | 6.878093000  | 4.518606000  |
|                                 |              |              |              | 6  | 4.946740000  | 7.106924000  | 4.218539000  |
|                                 |              |              |              | 6  | 2.618033000  | 7.539739000  | 3.759302000  |
|                                 |              |              |              | 6  | 5.313459000  | 7.971054000  | 3.183741000  |
|                                 |              |              |              | 6  | 2.981149000  | 8.400825000  | 2.721710000  |
|                                 |              |              |              | 6  | 4.330803000  | 8.619401000  | 2.431208000  |
|                                 |              |              |              | 1  | 5.715018000  | 6.613640000  | 4.808887000  |
|                                 |              |              |              | 1  | 1.565326000  | 7.379525000  | 3.983688000  |
|                                 |              |              |              | 1  | 6.365589000  | 8.142266000  | 2.970563000  |
|                                 |              |              |              | 1  | 2.211593000  | 8.902684000  | 2.141327000  |
|                                 |              |              |              | 1  | 4.611670000  | 9.288748000  | 1.623175000  |
| <b>4TS4<sub>B,C4-endo</sub></b> |              |              |              |    |              |              |              |
| 26                              | 2.603507000  | -4.484071000 | -0.152458000 |    |              |              |              |
| 7                               | 1.319247000  | -4.117737000 | 1.372524000  |    |              |              |              |
| 7                               | 4.036743000  | -5.027572000 | 1.167961000  |    |              |              |              |
| 7                               | 3.823548000  | -5.028835000 | -1.677741000 |    |              |              |              |
| 7                               | 1.114943000  | -4.107447000 | -1.474137000 |    |              |              |              |
| 6                               | 0.033694000  | -3.648832000 | 1.282606000  |    |              |              |              |
| 6                               | -0.517897000 | -3.416287000 | 2.614230000  |    |              |              |              |
| 6                               | 0.470364000  | -3.766108000 | 3.485669000  |    |              |              |              |
| 6                               | 1.608589000  | -4.195194000 | 2.707297000  |    |              |              |              |
| 6                               | 3.943999000  | -4.982849000 | 2.532486000  |    |              |              |              |
| 6                               | 5.201185000  | -5.380812000 | 3.129448000  |    |              |              |              |



|   |              |              |              |   |              |              |              |
|---|--------------|--------------|--------------|---|--------------|--------------|--------------|
| 6 | 1.930638000  | 4.278012000  | 4.147913000  | 6 | -4.481467000 | 1.565592000  | -0.324257000 |
| 8 | 2.246906000  | 3.986535000  | 2.988104000  | 7 | -3.214382000 | 1.212081000  | -0.058774000 |
| 7 | 0.650412000  | 4.437790000  | 4.544037000  | 1 | -5.160609000 | 0.714189000  | 1.382375000  |
| 1 | 0.455499000  | 4.816434000  | 5.461811000  | 1 | -6.406808000 | 1.410256000  | 0.391862000  |
| 6 | -0.469016000 | 4.279624000  | 3.635540000  | 7 | -5.452486000 | 1.102021000  | 0.488338000  |
| 1 | -0.071381000 | 4.362030000  | 2.618507000  | 1 | -3.060473000 | 0.824977000  | 0.874487000  |
| 6 | -1.073731000 | 2.855514000  | 3.762259000  | 1 | -2.462540000 | 1.794062000  | -0.454566000 |
| 1 | -0.233277000 | 2.157023000  | 3.650502000  | 6 | -8.369037000 | 7.578511000  | -5.559941000 |
| 8 | -1.968310000 | 2.701422000  | 2.656421000  | 1 | -8.759228000 | 6.777760000  | -6.198995000 |
| 1 | -2.454527000 | 1.849886000  | 2.747956000  | 1 | -9.033878000 | 8.445185000  | -5.657279000 |
| 6 | -1.764246000 | 2.603274000  | 5.103828000  | 1 | -8.416271000 | 7.229317000  | -4.521656000 |
| 1 | -1.063782000 | 2.741709000  | 5.934760000  | 6 | -6.925278000 | 7.942043000  | -5.952767000 |
| 1 | -2.133277000 | 1.573359000  | 5.153856000  | 6 | -5.963942000 | 6.776794000  | -5.835585000 |
| 1 | -2.616348000 | 3.277764000  | 5.242837000  | 6 | -5.278652000 | 6.515812000  | -4.641168000 |
| 6 | -1.451996000 | 5.452444000  | 3.831567000  | 6 | -5.749497000 | 5.898371000  | -6.909013000 |
| 8 | -1.154188000 | 6.432404000  | 4.519475000  | 6 | -4.417581000 | 5.424245000  | -4.510983000 |
| 7 | -2.615269000 | 5.319137000  | 3.152100000  | 6 | -4.895097000 | 4.802996000  | -6.799018000 |
| 1 | -2.774179000 | 4.426189000  | 2.684152000  | 6 | -4.222078000 | 4.552769000  | -5.594106000 |
| 6 | -3.574664000 | 6.393344000  | 2.994387000  | 8 | -3.400566000 | 3.470382000  | -5.532597000 |
| 1 | -3.192343000 | 7.242141000  | 3.565879000  | 1 | -3.034939000 | 3.369093000  | -4.618215000 |
| 6 | -3.726801000 | 6.792665000  | 1.492651000  | 1 | -6.580223000 | 8.768107000  | -5.317608000 |
| 1 | -4.493539000 | 7.576646000  | 1.433254000  | 1 | -6.920974000 | 8.319835000  | -6.983392000 |
| 1 | -4.128289000 | 5.920795000  | 0.962201000  | 1 | -5.410593000 | 7.184817000  | -3.792750000 |
| 6 | -2.451412000 | 7.250946000  | 0.851680000  | 1 | -6.259418000 | 6.076847000  | -7.853923000 |
| 6 | -1.574792000 | 6.471561000  | 0.123964000  | 1 | -3.886484000 | 5.248230000  | -3.579713000 |
| 7 | -0.495064000 | 7.216397000  | -0.288482000 | 1 | -4.734696000 | 4.132013000  | -7.638248000 |
| 1 | -1.641393000 | 5.420842000  | -0.130522000 | 8 | 1.733360000  | 6.212022000  | -1.711906000 |
| 1 | 0.296770000  | 6.876324000  | -0.853478000 | 8 | 3.214476000  | 7.771097000  | -1.077329000 |
| 6 | -1.871063000 | 8.570846000  | 0.894625000  | 6 | 2.841119000  | 6.592599000  | -1.152464000 |
| 6 | -0.643584000 | 8.504697000  | 0.170552000  | 6 | 3.677670000  | 5.479591000  | -0.492732000 |
| 6 | -2.255611000 | 9.802835000  | 1.458678000  | 1 | 3.251660000  | 5.322632000  | 0.510256000  |
| 6 | 0.197589000  | 9.614884000  | 0.011919000  | 1 | 3.530165000  | 4.537798000  | -1.034358000 |
| 6 | -1.427944000 | 10.909147000 | 1.298170000  | 6 | 5.169528000  | 5.800259000  | -0.370088000 |
| 6 | -0.210867000 | 10.815088000 | 0.586023000  | 1 | 5.276256000  | 6.808079000  | 0.040881000  |
| 1 | -3.186672000 | 9.892123000  | 2.014323000  | 1 | 5.624554000  | 5.836205000  | -1.369865000 |
| 1 | -1.717234000 | 11.863507000 | 1.731083000  | 6 | 5.938394000  | 4.826132000  | 0.543308000  |
| 1 | 0.416387000  | 11.696926000 | 0.484071000  | 1 | 5.559982000  | 4.898861000  | 1.567120000  |
| 1 | 1.135404000  | 9.520588000  | -0.529612000 | 1 | 6.998821000  | 5.113445000  | 0.572375000  |
| 6 | -4.943056000 | 5.949978000  | 3.524313000  | 6 | 5.870782000  | 3.350410000  | 0.164941000  |
| 8 | -5.423107000 | 4.849810000  | 3.205119000  | 8 | 5.613173000  | 2.471738000  | 1.009712000  |
| 7 | -5.600124000 | 6.847172000  | 4.287203000  | 7 | 6.118362000  | 3.044929000  | -1.127079000 |
| 1 | -5.126884000 | 7.709049000  | 4.524624000  | 1 | 6.363310000  | 3.799638000  | -1.754253000 |
| 6 | -6.973608000 | 6.672588000  | 4.758393000  | 6 | 6.174786000  | 1.682808000  | -1.647983000 |
| 1 | -7.462226000 | 7.650711000  | 4.707991000  | 1 | 5.654049000  | 1.659099000  | -2.610847000 |
| 1 | -7.477953000 | 6.016678000  | 4.044955000  | 1 | 5.626151000  | 1.048817000  | -0.949609000 |
| 6 | -7.079953000 | 6.126475000  | 6.192301000  | 6 | 7.616606000  | 1.152579000  | -1.810002000 |
| 1 | -6.544075000 | 6.805454000  | 6.867061000  | 1 | 7.545505000  | 0.101732000  | -2.116331000 |
| 1 | -8.138099000 | 6.171692000  | 6.485584000  | 1 | 8.103764000  | 1.171081000  | -0.828201000 |
| 6 | -6.549575000 | 4.699093000  | 6.399804000  | 6 | 8.435489000  | 1.931221000  | -2.818085000 |
| 1 | -6.567721000 | 4.470430000  | 7.472892000  | 6 | 8.399302000  | 1.597160000  | -4.180958000 |
| 1 | -5.500893000 | 4.635452000  | 6.085958000  | 6 | 9.220790000  | 3.024476000  | -2.422511000 |
| 6 | -7.371694000 | 3.632975000  | 5.658975000  | 6 | 9.120120000  | 2.335504000  | -5.121627000 |
| 1 | -8.422780000 | 3.690729000  | 5.961383000  | 6 | 9.942893000  | 3.767293000  | -3.360576000 |
| 1 | -7.341168000 | 3.793301000  | 4.579462000  | 6 | 9.893683000  | 3.425959000  | -4.713928000 |
| 7 | -6.927978000 | 2.265328000  | 5.929430000  | 1 | 7.807202000  | 0.744026000  | -4.505358000 |
| 1 | -7.203919000 | 1.865277000  | 6.816047000  | 1 | 9.273074000  | 3.290575000  | -1.369340000 |
| 6 | -6.009065000 | 1.573662000  | 5.224173000  | 1 | 9.082142000  | 2.056032000  | -6.171287000 |
| 7 | -5.425393000 | 2.085361000  | 4.139354000  | 1 | 10.547236000 | 4.608901000  | -3.032139000 |
| 1 | -5.469950000 | 3.076889000  | 3.905963000  | 1 | 10.457346000 | 4.000314000  | -5.444121000 |
| 1 | -4.747576000 | 1.500403000  | 3.626972000  | 7 | 0.956785000  | 3.780883000  | -2.165279000 |
| 7 | -5.689608000 | 0.331581000  | 5.613601000  | 1 | 0.572694000  | 3.405144000  | -1.279569000 |
| 1 | -6.262384000 | -0.140834000 | 6.298032000  | 1 | 1.663354000  | 3.121355000  | -2.502123000 |
| 1 | -5.011760000 | -0.236104000 | 5.068549000  | 1 | 1.395842000  | 4.773509000  | -1.966685000 |
| 6 | -7.730410000 | 4.747220000  | -1.396171000 | 6 | -0.217507000 | 3.848098000  | -3.096461000 |
| 1 | -7.939656000 | 5.667490000  | -0.840552000 | 1 | -0.444442000 | 4.908606000  | -3.246583000 |
| 1 | -8.546528000 | 4.042335000  | -1.195232000 | 6 | -1.426231000 | 3.219209000  | -2.353906000 |
| 1 | -7.752126000 | 4.989966000  | -2.465370000 | 8 | -2.495899000 | 3.054754000  | -3.007896000 |
| 6 | -6.374083000 | 4.161674000  | -0.991204000 | 8 | -1.249624000 | 2.938457000  | -1.141102000 |
| 1 | -6.351168000 | 3.973673000  | 0.090242000  | 6 | 0.088313000  | 3.203288000  | -4.463708000 |
| 1 | -5.576266000 | 4.886035000  | -1.197390000 | 1 | -0.827890000 | 3.265344000  | -5.058708000 |
| 6 | -6.055985000 | 2.863167000  | -1.749199000 | 1 | 0.829789000  | 3.812789000  | -4.988418000 |
| 1 | -6.840737000 | 2.113175000  | -1.589056000 | 6 | 0.581544000  | 1.782591000  | -4.363867000 |
| 1 | -6.037107000 | 3.058915000  | -2.825468000 | 6 | -0.150159000 | 0.680604000  | -3.924622000 |
| 7 | -4.752796000 | 2.293788000  | -1.411297000 | 1 | -1.183458000 | 0.621956000  | -3.614031000 |
| 1 | -3.944238000 | 2.571285000  | -1.988089000 | 7 | 0.644543000  | -0.429983000 | -3.929057000 |





|    |              |              |              |   |              |              |              |
|----|--------------|--------------|--------------|---|--------------|--------------|--------------|
| 1  | 8.306217000  | -3.055914000 | -7.090853000 | 1 | -5.748791000 | 2.739882000  | 1.803259000  |
| 1  | 5.954189000  | -2.511322000 | -8.332001000 | 1 | -4.780806000 | 1.530256000  | 0.970016000  |
| 1  | 0.877256000  | -3.038032000 | -7.073117000 | 6 | -3.729576000 | 3.350486000  | 1.387421000  |
| 1  | -0.477082000 | -3.948968000 | -4.904432000 | 6 | -2.651600000 | 3.188870000  | 0.540642000  |
| 6  | 0.496576000  | -5.678004000 | 0.089897000  | 7 | -1.900215000 | 4.338181000  | 0.491972000  |
| 6  | -0.154886000 | -4.321340000 | 0.420247000  | 1 | -2.351363000 | 2.318911000  | -0.030208000 |
| 6  | -1.534046000 | -4.427364000 | 1.068833000  | 1 | -1.045217000 | 4.469685000  | -0.069255000 |
| 8  | -2.308692000 | -3.767304000 | 0.933774000  | 6 | -3.634671000 | 4.693699000  | 1.903791000  |
| 8  | -1.843329000 | -5.447828000 | 1.714598000  | 6 | -2.469610000 | 5.276412000  | 1.321753000  |
| 1  | 0.540188000  | -6.278961000 | 1.003211000  | 6 | -4.403445000 | 5.466811000  | 2.795992000  |
| 1  | -0.149168000 | -6.225101000 | -0.609775000 | 6 | -2.053446000 | 6.581455000  | 1.619884000  |
| 1  | 0.492494000  | -3.767304000 | 1.115937000  | 6 | -4.000783000 | 6.766096000  | 3.085733000  |
| 1  | -0.233486000 | -3.699212000 | -0.477183000 | 6 | -2.833793000 | 7.315698000  | 2.507893000  |
| 16 | 4.540417000  | -6.690730000 | -4.468242000 | 1 | -5.300072000 | 5.056151000  | 3.255509000  |
| 1  | 5.850818000  | -6.806524000 | -4.783716000 | 1 | -4.587568000 | 7.369554000  | 3.773905000  |
| 8  | 4.594207000  | -3.758328000 | -3.004098000 | 1 | -2.540300000 | 8.330670000  | 2.763620000  |
| 7  | 3.410884000  | -0.672407000 | 1.850847000  | 1 | -1.139952000 | 6.975891000  | 1.183924000  |
| 1  | 4.245686000  | -0.108219000 | 1.725496000  | 6 | -5.563953000 | 0.562100000  | 3.347842000  |
| 1  | 2.567404000  | -0.142477000 | 2.046154000  | 8 | -5.644222000 | -0.458560000 | 2.645437000  |
| 6  | 3.462579000  | -1.930157000 | 2.360474000  | 7 | -6.456853000 | 0.863673000  | 4.311682000  |
| 8  | 2.449186000  | -2.532637000 | 2.732633000  | 1 | -6.303451000 | 1.697782000  | 4.863014000  |
| 6  | 4.834131000  | -2.605108000 | 2.403924000  | 6 | -7.643471000 | 0.060158000  | 4.600484000  |
| 1  | 4.748246000  | -3.431800000 | 3.112982000  | 1 | -8.452583000 | 0.751550000  | 4.855638000  |
| 1  | 5.027338000  | -3.043506000 | 1.416244000  | 1 | -7.923505000 | -0.445372000 | 3.673336000  |
| 6  | 6.020216000  | -1.705752000 | 2.799126000  | 6 | -7.452096000 | -0.941995000 | 5.750630000  |
| 1  | 6.161809000  | -0.883639000 | 2.092103000  | 1 | -7.158639000 | -0.387515000 | 6.650819000  |
| 1  | 6.932302000  | -2.313652000 | 2.758536000  | 1 | -8.433681000 | -1.385426000 | 5.969653000  |
| 6  | 5.909306000  | -1.192070000 | 4.233818000  | 6 | -6.429587000 | -2.059621000 | 5.501129000  |
| 8  | 5.775076000  | -1.960028000 | 5.188867000  | 1 | -6.291300000 | -2.622401000 | 6.432978000  |
| 7  | 5.997999000  | 0.159390000  | 4.393858000  | 1 | -5.452419000 | -1.631184000 | 5.249263000  |
| 1  | 5.997454000  | 0.762825000  | 3.571589000  | 6 | -6.860875000 | -3.038975000 | 4.399946000  |
| 6  | 5.982647000  | 0.745266000  | 5.720974000  | 1 | -7.837860000 | -3.471032000 | 4.641621000  |
| 1  | 6.577877000  | 0.131681000  | 6.399995000  | 1 | -6.965354000 | -2.530204000 | 3.439542000  |
| 1  | 6.439396000  | 1.739344000  | 5.666729000  | 7 | -5.933809000 | -4.156274000 | 4.226048000  |
| 6  | 4.597147000  | 0.891814000  | 6.375787000  | 1 | -5.970669000 | -4.888268000 | 4.922958000  |
| 8  | 4.465095000  | 0.832183000  | 7.599435000  | 6 | -4.865203000 | -4.173540000 | 3.401475000  |
| 7  | 3.577418000  | 1.148710000  | 5.523031000  | 7 | -4.592264000 | -3.158127000 | 2.583641000  |
| 1  | 3.730914000  | 1.092594000  | 4.521692000  | 1 | -5.016200000 | -2.236744000 | 2.690090000  |
| 6  | 2.185314000  | 1.172081000  | 5.931505000  | 1 | -3.765139000 | -3.239876000 | 1.971041000  |
| 1  | 1.993159000  | 0.308843000  | 6.581533000  | 7 | -4.075908000 | -5.257906000 | 3.389362000  |
| 1  | 1.790068000  | 2.438627000  | 6.750133000  | 1 | -4.391546000 | -6.107310000 | 3.835404000  |
| 6  | 2.450140000  | 2.445895000  | 7.622074000  | 1 | -3.271769000 | -5.325222000 | 2.734939000  |
| 1  | 0.771025000  | 2.287573000  | 7.126649000  | 6 | -7.953612000 | 0.052560000  | -2.415894000 |
| 6  | 1.875599000  | 3.754877000  | 6.009602000  | 1 | -8.611134000 | 0.557395000  | -1.700362000 |
| 6  | 3.051139000  | 4.518977000  | 6.046988000  | 1 | -8.324092000 | -0.971641000 | -2.546304000 |
| 6  | 0.779886000  | 4.245156000  | 5.280773000  | 1 | -8.049372000 | 0.568067000  | -3.379131000 |
| 6  | 3.134178000  | 5.738983000  | 5.371751000  | 6 | -6.501589000 | 0.060621000  | -1.922134000 |
| 6  | 0.861205000  | 5.461803000  | 4.599776000  | 1 | -6.432970000 | -0.442319000 | -0.949452000 |
| 6  | 2.039134000  | 6.213110000  | 4.644344000  | 1 | -6.160608000 | 1.092141000  | -1.768584000 |
| 1  | 3.901771000  | 4.159733000  | 6.621006000  | 6 | -5.549973000 | -0.625023000 | -2.915851000 |
| 1  | -0.144944000 | 3.672759000  | 5.250150000  | 1 | -5.905832000 | -1.636136000 | -3.152791000 |
| 1  | 4.051039000  | 6.320996000  | 5.418956000  | 1 | -5.543597000 | -0.080670000 | -3.864853000 |
| 1  | 0.005583000  | 5.825002000  | 4.036496000  | 7 | -4.159284000 | -0.685003000 | -2.466809000 |
| 1  | 2.100233000  | 7.161999000  | 4.118454000  | 1 | -3.516774000 | 0.060639000  | -2.770781000 |
| 6  | 1.352970000  | 1.012114000  | 4.648545000  | 6 | -3.673594000 | -1.558101000 | -1.575608000 |
| 8  | 1.870983000  | 1.141123000  | 3.532225000  | 7 | -2.415134000 | -1.459604000 | -1.150149000 |
| 7  | 0.050096000  | 0.703289000  | 4.815802000  | 1 | -3.970229000 | -3.238746000 | -0.488865000 |
| 1  | -0.379886000 | 0.776789000  | 5.729704000  | 1 | -5.261207000 | -2.864957000 | -1.573125000 |
| 6  | -0.843031000 | 0.528277000  | 3.685964000  | 7 | -4.441413000 | -2.554797000 | -1.073581000 |
| 1  | -0.432317000 | 1.099027000  | 2.846073000  | 1 | -2.117752000 | -2.117063000 | -0.425207000 |
| 6  | -0.874532000 | -0.955782000 | 3.234171000  | 1 | -1.857469000 | -0.609891000 | -1.323293000 |
| 1  | 0.171696000  | -1.261075000 | 3.096438000  | 6 | -8.069028000 | 6.417317000  | -2.719781000 |
| 8  | -1.542540000 | -0.962585000 | 1.970532000  | 1 | -8.382024000 | 6.214986000  | -3.750839000 |
| 1  | -1.725565000 | -1.889775000 | 1.694641000  | 1 | -8.786901000 | 7.118576000  | -2.277486000 |
| 6  | -1.530886000 | -1.890594000 | 4.250601000  | 1 | -8.128418000 | 5.475235000  | -2.162426000 |
| 1  | -1.006274000 | -1.844719000 | 5.211170000  | 6 | -6.640381000 | 6.989785000  | -2.681118000 |
| 1  | -1.484888000 | -2.926873000 | 3.898943000  | 6 | -5.612872000 | 6.050844000  | -3.278753000 |
| 1  | -2.583289000 | -1.630805000 | 4.409047000  | 6 | -5.094944000 | 4.980304000  | -2.535931000 |
| 6  | -2.212450000 | 1.146213000  | 4.032910000  | 6 | -5.173566000 | 6.191866000  | -4.603075000 |
| 8  | -2.379109000 | 1.798450000  | 5.068246000  | 6 | -4.184584000 | 4.078431000  | -3.085897000 |
| 7  | -3.161634000 | 0.947948000  | 3.089624000  | 6 | -4.261293000 | 5.301980000  | -5.170427000 |
| 1  | -2.922425000 | 0.303457000  | 2.335202000  | 6 | -3.761120000 | 4.232766000  | -4.415481000 |
| 6  | -4.458918000 | 1.596553000  | 3.103078000  | 8 | -2.870624000 | 3.385567000  | -5.005614000 |
| 1  | -4.432972000 | 2.332743000  | 3.909853000  | 1 | -2.676555000 | 2.623185000  | -4.396937000 |
| 6  | -4.741620000 | 2.305497000  | 1.744547000  | 1 | -6.375207000 | 7.213736000  | -1.639421000 |



|   |              |              |              |   |              |              |              |
|---|--------------|--------------|--------------|---|--------------|--------------|--------------|
| 6 | 3.374209000  | 8.377732000  | 1.467140000  | 1 | -5.959959000 | 3.873912000  | -3.305909000 |
| 1 | 4.978530000  | 7.693339000  | 4.391110000  | 6 | -6.533465000 | 1.903196000  | -2.644301000 |
| 0 | 0.783938000  | 7.471001000  | 3.480610000  | 1 | -7.380421000 | 1.397676000  | -2.165105000 |
| 1 | 5.441956000  | 8.455499000  | 2.080975000  | 1 | -6.401346000 | 1.432989000  | -3.623670000 |
| 1 | 1.244586000  | 8.215831000  | 1.163179000  | 1 | -5.319728000 | 1.618731000  | -1.878168000 |
| 1 | 3.575064000  | 8.712900000  | 0.453308000  | 1 | -4.434327000 | 1.515293000  | -2.396825000 |
| 6 | 1.723021000  | 4.718747000  | 4.724275000  | 6 | -5.264575000 | 1.495449000  | -0.547328000 |
| 8 | 2.150459000  | 4.070406000  | 3.764118000  | 7 | -4.141765000 | 1.096394000  | 0.042434000  |
| 7 | 0.400914000  | 4.841652000  | 4.990991000  | 1 | -6.258825000 | 1.684229000  | 1.215931000  |
| 1 | 0.088437000  | 5.527433000  | 5.670979000  | 1 | -7.064932000 | 2.378898000  | -0.117609000 |
| 6 | -0.599445000 | 4.453569000  | 4.012158000  | 7 | -6.367465000 | 1.727173000  | 0.211388000  |
| 1 | -0.166700000 | 4.583430000  | 3.011574000  | 1 | -4.048815000 | 1.074935000  | 1.066672000  |
| 6 | -0.982936000 | 2.949792000  | 4.100339000  | 1 | -3.379970000 | 0.708777000  | -0.533987000 |
| 1 | -0.036141000 | 2.394599000  | 4.098091000  | 6 | -5.326513000 | 8.846825000  | -4.899657000 |
| 8 | -1.687642000 | 2.664033000  | 2.884232000  | 1 | -5.872839000 | 8.505289000  | -5.786800000 |
| 1 | -2.418904000 | 2.013784000  | 3.020314000  | 1 | -5.480292000 | 9.928253000  | -4.801160000 |
| 6 | -1.768926000 | 2.576421000  | 5.353777000  | 1 | -5.773167000 | 8.359556000  | -4.025036000 |
| 1 | -1.196640000 | 2.841450000  | 6.249098000  | 6 | -3.829112000 | 8.508041000  | -5.010905000 |
| 1 | -1.955669000 | 1.497497000  | 5.382143000  | 6 | -3.568798000 | 7.022034000  | -5.147012000 |
| 1 | -2.734457000 | 3.091990000  | 5.387714000  | 6 | -3.428772000 | 6.206347000  | -4.015977000 |
| 6 | -1.781938000 | 5.437623000  | 4.122599000  | 6 | -3.495349000 | 6.404832000  | -6.405005000 |
| 8 | -1.719755000 | 6.458913000  | 4.819044000  | 6 | -3.223070000 | 4.829851000  | -4.125797000 |
| 7 | -2.842731000 | 5.106877000  | 3.358555000  | 6 | -3.290294000 | 5.032005000  | -6.535592000 |
| 1 | -2.744876000 | 4.236740000  | 2.835766000  | 6 | -3.152272000 | 4.230879000  | -5.393473000 |
| 6 | -3.908151000 | 6.036237000  | 3.006876000  | 8 | -2.948722000 | 2.895146000  | -5.563587000 |
| 1 | -3.501468000 | 7.047427000  | 3.105458000  | 1 | -2.832806000 | 2.447305000  | -4.684187000 |
| 6 | -4.338605000 | 5.792217000  | 1.537602000  | 1 | -3.308853000 | 8.891615000  | -4.123883000 |
| 1 | -5.127196000 | 6.513399000  | 1.291877000  | 1 | -3.405865000 | 9.036844000  | -5.874742000 |
| 1 | -4.798955000 | 4.798956000  | 1.481479000  | 1 | -3.470827000 | 6.652895000  | -3.024809000 |
| 6 | -3.175848000 | 5.908757000  | 0.592670000  | 1 | -3.594105000 | 7.011463000  | -7.303391000 |
| 6 | -2.285870000 | 4.903878000  | 0.271472000  | 1 | -3.107426000 | 4.217384000  | -3.236336000 |
| 7 | -1.245066000 | 5.391473000  | -0.480952000 | 1 | -3.226766000 | 4.566268000  | -7.515156000 |
| 1 | -2.302134000 | 3.857794000  | 0.547965000  | 8 | 0.974222000  | 3.601132000  | -0.464675000 |
| 1 | -0.387382000 | 4.848632000  | -0.675084000 | 8 | 1.951190000  | 5.535525000  | -1.055111000 |
| 6 | -2.643857000 | 7.110150000  | -0.002324000 | 6 | 1.971817000  | 4.412858000  | -0.513777000 |
| 6 | -1.425104000 | 6.745949000  | -0.652414000 | 6 | 3.233559000  | 3.958479000  | 0.239831000  |
| 6 | -3.063245000 | 8.454350000  | -0.052393000 | 1 | 3.040298000  | 4.158012000  | 1.304510000  |
| 6 | -0.623454000 | 7.683546000  | -1.318144000 | 1 | 3.332373000  | 2.870978000  | 0.145243000  |
| 6 | -2.276580000 | 9.384265000  | -0.724170000 | 6 | 4.513383000  | 4.673415000  | -0.196335000 |
| 6 | -1.064968000 | 9.003208000  | -1.345292000 | 1 | 4.295747000  | 5.741437000  | -0.290172000 |
| 1 | -3.988386000 | 8.764749000  | 0.428758000  | 1 | 4.793640000  | 4.338134000  | -1.204076000 |
| 1 | -2.591403000 | 10.424077000 | -0.766006000 | 6 | 5.678740000  | 4.506852000  | 0.793254000  |
| 1 | -0.466291000 | 9.756391000  | -1.851257000 | 1 | 5.413726000  | 4.948796000  | 1.759206000  |
| 1 | 0.312583000  | 7.371653000  | -1.769342000 | 1 | 6.558510000  | 5.054470000  | 0.425802000  |
| 6 | -5.080091000 | 5.864228000  | 3.991145000  | 6 | 6.132529000  | 3.082387000  | 1.082603000  |
| 8 | -5.954128000 | 4.997163000  | 3.825920000  | 8 | 6.430794000  | 2.715863000  | 2.240440000  |
| 7 | -5.070049000 | 6.717018000  | 5.036758000  | 7 | 6.234512000  | 2.249779000  | 0.030029000  |
| 1 | -4.251970000 | 7.305177000  | 5.148877000  | 1 | 5.880914000  | 2.548367000  | -0.871170000 |
| 6 | -6.096017000 | 6.744127000  | 6.076683000  | 6 | 6.713879000  | 0.875936000  | 0.128407000  |
| 1 | -6.299973000 | 7.794028000  | 6.311649000  | 1 | 6.140375000  | 0.272827000  | -0.578543000 |
| 1 | -7.002964000 | 6.325339000  | 5.635075000  | 1 | 6.497757000  | 0.514462000  | 1.135658000  |
| 6 | -5.711437000 | 6.006376000  | 7.370440000  | 6 | 8.224305000  | 0.739495000  | -0.157481000 |
| 1 | -4.814681000 | 6.478114000  | 7.791534000  | 1 | 8.495305000  | -0.309328000 | 0.018392000  |
| 1 | -6.517992000 | 6.175893000  | 8.097271000  | 1 | 8.773479000  | 1.342545000  | 0.574633000  |
| 6 | -5.449972000 | 4.499121000  | 7.229766000  | 6 | 8.610903000  | 1.144191000  | -1.564484000 |
| 1 | -5.083460000 | 4.115657000  | 8.190142000  | 6 | 8.382129000  | 0.276880000  | -2.644772000 |
| 1 | -4.647466000 | 4.328988000  | 6.501896000  | 6 | 9.176162000  | 2.399458000  | -1.827628000 |
| 6 | -6.690544000 | 3.687525000  | 6.822211000  | 6 | 8.708438000  | 0.653630000  | -3.948771000 |
| 1 | -7.500619000 | 3.843041000  | 7.541196000  | 6 | 9.504446000  | 2.781283000  | -3.131557000 |
| 1 | -7.065469000 | 4.007220000  | 5.847185000  | 6 | 9.271349000  | 1.909254000  | -4.196835000 |
| 7 | -6.445145000 | 2.242491000  | 6.779197000  | 1 | 7.944313000  | -0.702044000 | -2.460426000 |
| 1 | -6.516852000 | 1.747698000  | 7.658254000  | 1 | 9.363495000  | 3.082461000  | -1.002290000 |
| 6 | -5.803694000 | 1.596186000  | 5.782203000  | 1 | 8.527236000  | -0.034166000 | -4.770741000 |
| 7 | -5.559605000 | 2.184365000  | 4.611641000  | 1 | 9.943476000  | 3.758989000  | -3.313087000 |
| 1 | -5.762097000 | 3.168067000  | 4.437873000  | 1 | 9.527459000  | 2.203105000  | -5.211268000 |
| 1 | -4.954753000 | 1.685779000  | 3.932929000  | 7 | 0.406150000  | 1.126806000  | -1.447168000 |
| 7 | -5.459268000 | 0.307633000  | 5.946163000  | 1 | -0.214964000 | 0.612718000  | -0.804680000 |
| 1 | -5.501796000 | -0.098311000 | 6.870087000  | 1 | 1.025419000  | 0.387648000  | -1.865891000 |
| 1 | -4.834075000 | -0.156426000 | 5.259842000  | 1 | 0.940083000  | 1.861489000  | -0.922539000 |
| 6 | -8.088386000 | 3.637089000  | -3.662196000 | 6 | -0.514030000 | 1.865793000  | -2.375477000 |
| 1 | -8.277755000 | 4.708130000  | -3.788437000 | 1 | -0.761543000 | 2.768214000  | -1.807710000 |
| 1 | -8.971515000 | 3.194051000  | -3.185741000 | 6 | -1.860550000 | 1.116715000  | -2.446053000 |
| 1 | -7.990157000 | 3.195121000  | -4.660989000 | 8 | -2.744915000 | 1.546449000  | -3.245839000 |
| 6 | -6.825719000 | 3.401162000  | -2.827062000 | 8 | -2.040322000 | 0.231451000  | -1.570026000 |
| 1 | -6.934841000 | 3.883261000  | -1.845658000 | 6 | 0.158871000  | 2.398785000  | -3.649601000 |

|                                  |              |              |              |   |              |              |              |
|----------------------------------|--------------|--------------|--------------|---|--------------|--------------|--------------|
| 1                                | -0.594272000 | 3.043276000  | -4.112351000 | 6 | 4.708924000  | 0.025685000  | 4.992892000  |
| 1                                | 0.961986000  | 3.060953000  | -3.318419000 | 1 | 4.451810000  | -0.221972000 | 6.025663000  |
| 6                                | 0.680447000  | 1.464381000  | -4.713822000 | 1 | 4.827927000  | -0.924974000 | 4.456787000  |
| 6                                | -0.043020000 | 1.209340000  | -5.873862000 | 6 | 6.042915000  | 0.792632000  | 4.958435000  |
| 1                                | -1.028408000 | 1.561864000  | -6.146219000 | 1 | 6.363670000  | 1.005939000  | 3.935495000  |
| 7                                | 0.708890000  | 0.458568000  | -6.731404000 | 1 | 6.812700000  | 0.151680000  | 5.405151000  |
| 1                                | 0.412065000  | 0.136490000  | -7.640973000 | 6 | 5.997468000  | 2.065120000  | 5.800684000  |
| 6                                | 1.939915000  | 0.212366000  | -6.164849000 | 8 | 5.709393000  | 2.040173000  | 6.999414000  |
| 6                                | 1.959528000  | 0.841532000  | -4.894150000 | 7 | 6.308574000  | 3.224197000  | 5.154484000  |
| 6                                | 3.130172000  | 0.574514000  | -4.024807000 | 1 | 6.488535000  | 3.212927000  | 4.150687000  |
| 6                                | 4.272167000  | -0.093959000 | -4.687343000 | 6 | 6.395685000  | 4.468321000  | 5.894157000  |
| 6                                | 3.008557000  | -0.508215000 | -6.722260000 | 1 | 6.934762000  | 4.309797000  | 6.831130000  |
| 6                                | 4.180116000  | -0.629973000 | -5.950099000 | 1 | 6.961526000  | 5.187232000  | 5.292254000  |
| 1                                | 2.738934000  | -0.214684000 | -3.136654000 | 6 | 5.060352000  | 5.127227000  | 6.278614000  |
| 1                                | 5.183509000  | -0.185526000 | -4.108876000 | 8 | 4.981454000  | 5.838228000  | 7.282914000  |
| 1                                | 2.938732000  | -0.937110000 | -7.716549000 | 7 | 4.033695000  | 4.933597000  | 5.419471000  |
| 1                                | 5.034766000  | -1.157782000 | -6.362343000 | 1 | 4.133212000  | 4.307559000  | 4.628143000  |
| 7                                | 3.659782000  | 1.727094000  | -3.201811000 | 6 | 2.706239000  | 5.475571000  | 5.637860000  |
| 8                                | 3.180511000  | 2.850215000  | -3.341068000 | 1 | 2.404930000  | 5.266388000  | 6.671846000  |
| 8                                | 4.567091000  | 1.468446000  | -2.400954000 | 6 | 2.637395000  | 7.025551000  | 5.454260000  |
| <b>4INT5<sub>B,C4-endo</sub></b> |              |              |              |   |              |              |              |
| 26                               | 1.913804000  | -2.957734000 | -1.678076000 | 1 | 3.344047000  | 7.441283000  | 6.177974000  |
| 7                                | 1.215094000  | -2.567455000 | 0.180080000  | 1 | 1.637103000  | 7.357188000  | 5.757108000  |
| 7                                | 3.840889000  | -2.862464000 | -1.027077000 | 6 | 2.948228000  | 7.520090000  | 4.059746000  |
| 7                                | 2.620501000  | -3.431191000 | -3.533073000 | 6 | 4.270061000  | 7.785797000  | 3.672146000  |
| 7                                | -0.000330000 | -3.177078000 | -2.319472000 | 6 | 1.922812000  | 7.720270000  | 3.122538000  |
| 6                                | -0.090019000 | -2.568099000 | 0.615168000  | 6 | 4.561577000  | 8.227085000  | 2.379257000  |
| 6                                | -0.158231000 | -2.196740000 | 2.028873000  | 6 | 2.210197000  | 8.157740000  | 1.827658000  |
| 6                                | 1.126030000  | -1.976849000 | 2.418157000  | 6 | 3.532184000  | 8.411151000  | 1.452343000  |
| 6                                | 1.979805000  | -2.231933000 | 1.273779000  | 1 | 5.073551000  | 7.658324000  | 4.393159000  |
| 6                                | 4.241175000  | -2.541307000 | 0.246123000  | 1 | 0.890449000  | 7.536601000  | 3.412910000  |
| 6                                | 5.653505000  | -2.638646000 | 0.366714000  | 1 | 5.591245000  | 8.433930000  | 2.098899000  |
| 6                                | 6.129855000  | -3.031959000 | -0.875593000 | 1 | 1.404459000  | 8.300631000  | 1.112794000  |
| 6                                | 4.994398000  | -3.155965000 | -1.720080000 | 1 | 3.756800000  | 8.753231000  | 0.445836000  |
| 6                                | 3.926959000  | -3.642334000 | -3.916842000 | 6 | 1.754843000  | 4.745743000  | 4.680034000  |
| 6                                | 3.983523000  | -4.015296000 | -5.315154000 | 8 | 2.181979000  | 4.100365000  | 3.718237000  |
| 6                                | 2.702794000  | -4.023794000 | -5.771709000 | 7 | 0.433307000  | 4.868819000  | 4.948485000  |
| 6                                | 1.853927000  | -3.669730000 | -4.652252000 | 1 | 0.125188000  | 5.559095000  | 5.625890000  |
| 6                                | -0.404668000 | -3.436315000 | -3.609330000 | 6 | -0.571615000 | 4.483855000  | 3.972496000  |
| 6                                | -1.821183000 | -3.551935000 | -3.673550000 | 1 | -0.137703000 | 4.600708000  | 2.970499000  |
| 6                                | -2.289239000 | -3.373971000 | -2.383152000 | 6 | -0.971822000 | 2.985053000  | 4.075277000  |
| 6                                | -1.146577000 | -3.140090000 | -1.570264000 | 1 | -0.031590000 | 2.418437000  | 4.071178000  |
| 6                                | -1.178596000 | -2.869887000 | -0.178670000 | 8 | -1.690694000 | 2.697978000  | 2.867270000  |
| 6                                | 3.359859000  | -2.202799000 | 1.305458000  | 1 | -2.405938000 | 2.031604000  | 3.006870000  |
| 6                                | 5.026631000  | -3.522959000 | -3.086083000 | 6 | -1.753280000 | 2.631920000  | 5.337555000  |
| 6                                | 0.471212000  | -3.640103000 | -4.699075000 | 1 | -1.170218000 | 2.894770000  | 6.226557000  |
| 1                                | -2.157958000 | -2.876335000 | 0.288968000  | 1 | -1.954730000 | 1.555863000  | 5.375140000  |
| 1                                | 3.823506000  | -1.939117000 | 2.251655000  | 1 | -2.711136000 | 3.161254000  | 5.375271000  |
| 1                                | 6.002711000  | -3.725236000 | -3.517988000 | 6 | -1.738661000 | 5.487407000  | 4.078123000  |
| 1                                | 0.007864000  | -3.852985000 | -5.658886000 | 8 | -1.647834000 | 6.523032000  | 4.748707000  |
| 1                                | 1.480184000  | -1.645287000 | 3.387598000  | 7 | -2.818718000 | 5.158058000  | 3.339493000  |
| 1                                | 6.215595000  | -2.449273000 | 1.272723000  | 1 | -2.743963000 | 4.274975000  | 2.834483000  |
| 1                                | 7.153227000  | -3.223490000 | -1.173869000 | 6 | -3.858177000 | 6.108716000  | 2.967608000  |
| 1                                | 4.895291000  | -4.236857000 | -5.855838000 | 1 | -3.434508000 | 7.110452000  | 3.085780000  |
| 1                                | 2.342147000  | -4.261761000 | -6.764929000 | 6 | -4.253766000 | 5.886871000  | 1.484067000  |
| 1                                | -2.389000000 | -3.755494000 | -4.573169000 | 1 | -5.025626000 | 6.621555000  | 1.225264000  |
| 1                                | -3.312857000 | -3.389231000 | -2.030062000 | 1 | -4.725744000 | 4.900552000  | 1.405483000  |
| 6                                | -1.417682000 | -1.980191000 | 2.817816000  | 6 | -3.063304000 | 5.999912000  | 0.573808000  |
| 6                                | -2.131678000 | -0.699564000 | 2.355848000  | 6 | -2.158969000 | 4.995859000  | 0.291361000  |
| 6                                | -3.298081000 | -0.222998000 | 3.217258000  | 7 | -1.093402000 | 5.480717000  | -0.427315000 |
| 8                                | -3.791254000 | 0.923182000  | 2.866053000  | 1 | -2.181074000 | 3.952052000  | 0.576068000  |
| 8                                | -3.693493000 | -0.894133000 | 4.190831000  | 1 | -0.219491000 | 4.940662000  | -0.567488000 |
| 1                                | -1.170646000 | -1.892941000 | 3.880722000  | 6 | -2.513459000 | 7.198994000  | -0.009895000 |
| 1                                | -2.098528000 | -2.835929000 | 2.725960000  | 6 | -1.271891000 | 6.833257000  | -0.614436000 |
| 1                                | -1.411352000 | 0.126232000  | 2.307365000  | 6 | -2.933429000 | 8.541875000  | -0.084114000 |
| 1                                | -2.499741000 | -0.816010000 | 1.329574000  | 6 | -0.450519000 | 7.767132000  | -1.261012000 |
| 16                               | 1.886398000  | -5.280547000 | -1.100189000 | 6 | -2.125689000 | 9.468678000  | -0.735526000 |
| 1                                | 3.075208000  | -5.641012000 | -1.634100000 | 6 | -0.893217000 | 9.085595000  | -1.312742000 |
| 8                                | 1.901988000  | -1.126881000 | -2.074864000 | 1 | -3.874858000 | 8.853994000  | 0.363228000  |
| 7                                | 3.703693000  | 1.571406000  | 3.355133000  | 1 | -2.440249000 | 10.507789000 | -0.794488000 |
| 1                                | 4.633003000  | 1.840022000  | 3.048089000  | 1 | -0.280530000 | 9.835992000  | -1.805966000 |
| 1                                | 2.949566000  | 2.204808000  | 3.110440000  | 1 | 0.499385000  | 7.451862000  | -1.680879000 |
| 6                                | 3.489743000  | 0.745484000  | 4.411473000  | 6 | -5.056972000 | 5.946974000  | 3.918672000  |
| 8                                | 2.360677000  | 0.539976000  | 4.867586000  | 8 | -5.911483000 | 5.061415000  | 3.750406000  |
|                                  |              |              |              | 7 | -5.094173000 | 6.826915000  | 4.941381000  |
|                                  |              |              |              | 1 | -4.297577000 | 7.442343000  | 5.057050000  |





|    |              |              |              |   |              |              |              |
|----|--------------|--------------|--------------|---|--------------|--------------|--------------|
| 1  | 3.666588000  | -4.260621000 | 3.695059000  | 8 | -1.425044000 | 6.586547000  | 4.271571000  |
| 1  | 6.313610000  | -6.599786000 | -1.615516000 | 7 | -2.728436000 | 5.244306000  | 2.950255000  |
| 1  | 0.848588000  | -5.612577000 | -4.758611000 | 1 | -2.787171000 | 4.304997000  | 2.554777000  |
| 1  | 1.308413000  | -3.348962000 | 4.382765000  | 6 | -3.768580000 | 6.212313000  | 2.663024000  |
| 1  | 6.050317000  | -5.185863000 | 3.093024000  | 1 | -3.453056000 | 7.155439000  | 3.115060000  |
| 1  | 7.177753000  | -6.184806000 | 0.835272000  | 6 | -3.945228000 | 6.394698000  | 1.123414000  |
| 1  | 5.511023000  | -7.037526000 | -4.082337000 | 1 | -4.760581000 | 7.113057000  | 0.964962000  |
| 1  | 3.184877000  | -6.623126000 | -5.417341000 | 1 | -4.288947000 | 5.436031000  | 0.716823000  |
| 1  | -1.500999000 | -4.579596000 | -4.178860000 | 6 | -2.697342000 | 6.842134000  | 0.423149000  |
| 1  | -2.625078000 | -3.590611000 | -1.912756000 | 6 | -1.773792000 | 6.029633000  | -0.205008000 |
| 6  | -1.379920000 | -2.779337000 | 3.264836000  | 7 | -0.723885000 | 6.774572000  | -0.687002000 |
| 6  | -1.623704000 | -1.311092000 | 2.867883000  | 1 | -1.783956000 | 4.954619000  | -0.336730000 |
| 6  | -2.870234000 | -0.688509000 | 3.500237000  | 1 | 0.090104000  | 6.410830000  | -1.206222000 |
| 8  | -3.353893000 | 0.352909000  | 2.897045000  | 6 | -2.178958000 | 8.184820000  | 0.324747000  |
| 8  | -3.341231000 | -1.161825000 | 4.552982000  | 6 | -0.938700000 | 8.097142000  | -0.375282000 |
| 1  | -1.349070000 | -2.843941000 | 4.356616000  | 6 | -2.625355000 | 9.451231000  | 0.716825000  |
| 1  | -2.238956000 | -3.383652000 | 2.944875000  | 6 | -0.144268000 | 9.220986000  | -0.642672000 |
| 1  | -0.760478000 | -0.701524000 | 3.172691000  | 6 | -1.845250000 | 10.570299000 | 0.479978000  |
| 1  | -1.692972000 | -1.208092000 | 1.779717000  | 6 | -0.614461000 | 10.455791000 | -0.205625000 |
| 16 | 1.480275000  | -7.181347000 | 0.108906000  | 1 | -3.567140000 | 9.556892000  | 1.285012000  |
| 1  | 2.551433000  | -7.884633000 | -0.324387000 | 1 | -2.182374000 | 11.551306000 | 0.805450000  |
| 8  | 2.789122000  | -3.358197000 | -0.966278000 | 1 | -0.024819000 | 11.349276000 | -0.394227000 |
| 7  | 3.044877000  | 1.458905000  | 2.349646000  | 1 | 0.807398000  | 9.109465000  | -1.155767000 |
| 1  | 3.985534000  | 1.624220000  | 2.005028000  | 6 | -5.098642000 | 5.739043000  | 3.262551000  |
| 1  | 2.422646000  | 2.259757000  | 2.300970000  | 8 | -5.511071000 | 4.585517000  | 3.060102000  |
| 6  | 2.783340000  | 0.553871000  | 3.328210000  | 7 | -5.797569000 | 6.659593000  | 3.957612000  |
| 8  | 1.690297000  | 0.502485000  | 3.903470000  | 1 | -5.377855000 | 7.568129000  | 4.104083000  |
| 6  | 3.888879000  | -0.448873000 | 3.660827000  | 6 | -7.138887000 | 6.432994000  | 4.494449000  |
| 1  | 3.648353000  | -0.854729000 | 4.646177000  | 1 | -7.701076000 | 7.364212000  | 4.372546000  |
| 1  | 3.824618000  | -1.278041000 | 2.944418000  | 1 | -7.614457000 | 5.677904000  | 3.864222000  |
| 6  | 5.325709000  | 0.105739000  | 3.666403000  | 6 | -7.158521000 | 6.019915000  | 5.976090000  |
| 1  | 5.623871000  | 0.474206000  | 2.681134000  | 1 | -6.658240000 | 6.799799000  | 6.563537000  |
| 1  | 6.004723000  | -0.720052000 | 3.911239000  | 1 | -8.207442000 | 6.012111000  | 6.303714000  |
| 6  | 5.532018000  | 1.168403000  | 4.744597000  | 6 | -6.509197000 | 4.664162000  | 6.297169000  |
| 8  | 5.297504000  | 0.940162000  | 5.933296000  | 1 | -6.463349000 | 4.546447000  | 7.387215000  |
| 7  | 6.011379000  | 2.370495000  | 4.315366000  | 1 | -5.473096000 | 4.646972000  | 5.938966000  |
| 1  | 6.107442000  | 2.542373000  | 3.314156000  | 6 | -7.274823000 | 3.468297000  | 5.709539000  |
| 6  | 6.327946000  | 3.418811000  | 5.266887000  | 1 | -8.311948000 | 3.475628000  | 6.061742000  |
| 1  | 6.819993000  | 2.987605000  | 6.141151000  | 1 | -7.307808000 | 3.519690000  | 4.619410000  |
| 1  | 7.023945000  | 4.118467000  | 4.791794000  | 7 | -6.707480000 | 2.173295000  | 6.087138000  |
| 6  | 5.132614000  | 4.226375000  | 5.804578000  | 1 | -6.896684000 | 1.851193000  | 7.026743000  |
| 8  | 5.154207000  | 4.706268000  | 6.939153000  | 6 | -5.768331000 | 1.489670000  | 5.399865000  |
| 7  | 4.115606000  | 4.415457000  | 4.930223000  | 7 | -5.287185000 | 1.934467000  | 4.239021000  |
| 1  | 4.108135000  | 3.908552000  | 4.051472000  | 1 | -5.418379000 | 2.894283000  | 3.920906000  |
| 6  | 2.843893000  | 5.006065000  | 5.307015000  | 1 | -4.583367000 | 1.358478000  | 3.749777000  |
| 1  | 2.515207000  | 4.558190000  | 6.253942000  | 7 | -5.325263000 | 0.321571000  | 5.886727000  |
| 6  | 2.907286000  | 6.544175000  | 5.548763000  | 1 | -5.819448000 | -0.125836000 | 6.645191000  |
| 1  | 3.640573000  | 6.688801000  | 6.346965000  | 1 | -4.613819000 | -0.232563000 | 5.372362000  |
| 1  | 1.935819000  | 6.857724000  | 5.950370000  | 6 | -7.878287000 | 3.882734000  | -1.825740000 |
| 6  | 3.262178000  | 7.386512000  | 4.344317000  | 1 | -8.155637000 | 4.872505000  | -1.448077000 |
| 6  | 4.598628000  | 7.712232000  | 4.070784000  | 1 | -8.638241000 | 3.169172000  | -1.484102000 |
| 6  | 2.263423000  | 7.871028000  | 3.484796000  | 1 | -7.921984000 | 3.918958000  | -2.920931000 |
| 6  | 4.931480000  | 8.499389000  | 2.965729000  | 6 | -6.481386000 | 3.484333000  | -1.339199000 |
| 6  | 2.593077000  | 8.654000000  | 2.376399000  | 1 | -6.451242000 | 3.475124000  | -0.242268000 |
| 6  | 3.928848000  | 8.971999000  | 2.114849000  | 1 | -5.743383000 | 4.225304000  | -1.671280000 |
| 1  | 5.380540000  | 7.356782000  | 4.737400000  | 6 | -6.061231000 | 2.104933000  | -1.869662000 |
| 1  | 1.220312000  | 7.636960000  | 3.687704000  | 1 | -6.804488000 | 1.344868000  | -1.599253000 |
| 1  | 5.972046000  | 8.748467000  | 2.773773000  | 1 | -6.030228000 | 2.117969000  | -2.963537000 |
| 1  | 1.807956000  | 9.018450000  | 1.719209000  | 7 | -4.734651000 | 1.679724000  | -1.425669000 |
| 1  | 4.184656000  | 9.583664000  | 1.254040000  | 1 | -3.929725000 | 1.973756000  | -1.998741000 |
| 6  | 1.838740000  | 4.612187000  | 4.212299000  | 6 | -4.447099000 | 1.170557000  | -0.221593000 |
| 8  | 2.219361000  | 4.145024000  | 3.131926000  | 7 | -3.176482000 | 0.987754000  | 0.142201000  |
| 7  | 0.535651000  | 4.778094000  | 4.521371000  | 1 | -5.124784000 | 0.361535000  | 1.505449000  |
| 1  | 0.275727000  | 5.319024000  | 5.336686000  | 1 | -6.357653000 | 0.637326000  | 0.327341000  |
| 6  | -0.525942000 | 4.439090000  | 3.592565000  | 7 | -5.420837000 | 0.824001000  | 0.651974000  |
| 1  | -0.101471000 | 4.465733000  | 2.582979000  | 1 | -3.016301000 | 0.687765000  | 1.108739000  |
| 6  | -1.017248000 | 2.985751000  | 3.828750000  | 1 | -2.430148000 | 1.506103000  | -0.344371000 |
| 1  | -0.121061000 | 2.350709000  | 3.813155000  | 6 | -6.100932000 | 9.430019000  | -4.684066000 |
| 8  | -1.846965000 | 2.663250000  | 2.708743000  | 1 | -6.674586000 | 9.018458000  | -5.522875000 |
| 1  | -2.302212000 | 1.805464000  | 2.871298000  | 1 | -6.334261000 | 10.498622000 | -4.604868000 |
| 6  | -1.737605000 | 2.794239000  | 5.164098000  | 1 | -6.449283000 | 8.937579000  | -3.768643000 |
| 1  | -1.080147000 | 3.062670000  | 5.998166000  | 6 | -4.590963000 | 9.207636000  | -4.887340000 |
| 1  | -2.024004000 | 1.745137000  | 5.294336000  | 6 | -4.213310000 | 7.744826000  | -5.002953000 |
| 1  | -2.645318000 | 3.405235000  | 5.218264000  | 6 | -3.877048000 | 6.988515000  | -3.872206000 |
| 6  | -1.611208000 | 5.532594000  | 3.656243000  | 6 | -4.217320000 | 7.087230000  | -6.242913000 |

|    |              |              |              |                                       |              |  |
|----|--------------|--------------|--------------|---------------------------------------|--------------|--|
| 6  | -3.558045000 | 5.632441000  | -3.964057000 |                                       |              |  |
| 6  | -3.899686000 | 5.734765000  | -6.355433000 |                                       |              |  |
| 6  | -3.564409000 | 4.992600000  | -5.213567000 |                                       |              |  |
| 8  | -3.258402000 | 3.675530000  | -5.372694000 |                                       |              |  |
| 1  | -2.984198000 | 3.279632000  | -4.506179000 |                                       |              |  |
| 1  | -4.047528000 | 9.661174000  | -4.048642000 |                                       |              |  |
| 1  | -4.270743000 | 9.742529000  | -5.790900000 |                                       |              |  |
| 1  | -3.854597000 | 7.466164000  | -2.894502000 |                                       |              |  |
| 1  | -4.467789000 | 7.646906000  | -7.142306000 |                                       |              |  |
| 1  | -3.295781000 | 5.070476000  | -3.072321000 |                                       |              |  |
| 1  | -3.897549000 | 5.239347000  | -7.322387000 |                                       |              |  |
| 8  | 1.569922000  | 5.738137000  | -1.959867000 |                                       |              |  |
| 8  | 2.907462000  | 7.446121000  | -1.388570000 |                                       |              |  |
| 6  | 2.616599000  | 6.241313000  | -1.383022000 |                                       |              |  |
| 6  | 3.483256000  | 5.236585000  | -0.600259000 |                                       |              |  |
| 1  | 2.904310000  | 4.957794000  | 0.293549000  |                                       |              |  |
| 1  | 3.585377000  | 4.316590000  | -1.189475000 |                                       |              |  |
| 6  | 4.853042000  | 5.769997000  | -0.172181000 |                                       |              |  |
| 1  | 4.719642000  | 6.770388000  | 0.249306000  |                                       |              |  |
| 1  | 5.496098000  | 5.909838000  | -1.052682000 |                                       |              |  |
| 6  | 5.550587000  | 4.901533000  | 0.889857000  |                                       |              |  |
| 1  | 4.941240000  | 4.873283000  | 1.798580000  |                                       |              |  |
| 1  | 6.508374000  | 5.361956000  | 1.171317000  |                                       |              |  |
| 6  | 5.845434000  | 3.448719000  | 0.532213000  |                                       |              |  |
| 8  | 5.796562000  | 2.547633000  | 1.395161000  |                                       |              |  |
| 7  | 6.185253000  | 3.189215000  | -0.744573000 |                                       |              |  |
| 1  | 6.233233000  | 3.964686000  | -1.391239000 |                                       |              |  |
| 6  | 6.520426000  | 1.863405000  | -1.255762000 |                                       |              |  |
| 1  | 6.056414000  | 1.765517000  | -2.241011000 |                                       |              |  |
| 1  | 6.063491000  | 1.132199000  | -0.586240000 |                                       |              |  |
| 6  | 8.039792000  | 1.611278000  | -1.341829000 |                                       |              |  |
| 1  | 8.178570000  | 0.577659000  | -1.684233000 |                                       |              |  |
| 1  | 8.462653000  | 1.675478000  | -0.332721000 |                                       |              |  |
| 6  | 8.761694000  | 2.566640000  | -2.270016000 |                                       |              |  |
| 6  | 8.664478000  | 2.421239000  | -3.663178000 |                                       |              |  |
| 6  | 9.519163000  | 3.632114000  | -1.763760000 |                                       |              |  |
| 6  | 9.305936000  | 3.313399000  | -4.523745000 |                                       |              |  |
| 6  | 10.163773000 | 4.527811000  | -2.621705000 |                                       |              |  |
| 6  | 10.059064000 | 4.371110000  | -4.005167000 |                                       |              |  |
| 1  | 8.079178000  | 1.602538000  | -4.075809000 |                                       |              |  |
| 1  | 9.609618000  | 3.757313000  | -0.687169000 |                                       |              |  |
| 1  | 9.220601000  | 3.181364000  | -5.599270000 |                                       |              |  |
| 1  | 10.748529000 | 5.345354000  | -2.207892000 |                                       |              |  |
| 1  | 10.560953000 | 5.064858000  | -4.674366000 |                                       |              |  |
| 7  | 1.002776000  | 3.208724000  | -2.311445000 |                                       |              |  |
| 1  | 0.661876000  | 2.816667000  | -1.417330000 |                                       |              |  |
| 1  | 1.769231000  | 2.616061000  | -2.659472000 |                                       |              |  |
| 1  | 1.354994000  | 4.225272000  | -2.126940000 |                                       |              |  |
| 6  | -0.186846000 | 3.216919000  | -3.221259000 |                                       |              |  |
| 1  | -0.393552000 | 4.263630000  | -3.466966000 |                                       |              |  |
| 6  | -1.395748000 | 2.683149000  | -2.408714000 |                                       |              |  |
| 8  | -2.495550000 | 2.546593000  | -3.021366000 |                                       |              |  |
| 8  | -1.185531000 | 2.435807000  | -1.195487000 |                                       |              |  |
| 6  | 0.068697000  | 2.451505000  | -4.535189000 |                                       |              |  |
| 1  | -0.833594000 | 2.572549000  | -5.143819000 |                                       |              |  |
| 1  | 0.870190000  | 2.964124000  | -5.078558000 |                                       |              |  |
| 6  | 0.413523000  | 0.992551000  | -4.372961000 |                                       |              |  |
| 6  | -0.409106000 | 0.010742000  | -3.821974000 |                                       |              |  |
| 1  | -1.409054000 | 0.094615000  | -3.422780000 |                                       |              |  |
| 7  | 0.228492000  | -1.195673000 | -3.864793000 |                                       |              |  |
| 1  | -0.170116000 | -2.074893000 | -3.549951000 |                                       |              |  |
| 6  | 1.462417000  | -1.044387000 | -4.458908000 |                                       |              |  |
| 6  | 1.606545000  | 0.326320000  | -4.776355000 |                                       |              |  |
| 6  | 2.836214000  | 0.782069000  | -5.418043000 |                                       |              |  |
| 6  | 3.709169000  | -0.290483000 | -5.925578000 |                                       |              |  |
| 6  | 2.400650000  | -2.026969000 | -4.812596000 |                                       |              |  |
| 6  | 3.514403000  | -1.609005000 | -5.575850000 |                                       |              |  |
| 1  | 2.751025000  | 1.651137000  | -6.072831000 |                                       |              |  |
| 1  | 4.564628000  | 0.000036000  | -6.524557000 |                                       |              |  |
| 1  | 2.253610000  | -3.069910000 | -4.553894000 |                                       |              |  |
| 1  | 4.220798000  | -2.358819000 | -5.920504000 |                                       |              |  |
| 7  | 3.869278000  | 1.602287000  | -4.211974000 |                                       |              |  |
| 8  | 4.994315000  | 1.891037000  | -4.586102000 |                                       |              |  |
| 8  | 3.450893000  | 1.788413000  | -3.070306000 |                                       |              |  |
|    |              |              |              | <sup>2</sup> Int4 <sub>B,C4-exo</sub> |              |  |
| 26 | 2.446845000  |              | -4.863788000 |                                       | -0.087934000 |  |
| 7  | 1.200260000  |              | -4.320673000 |                                       | 1.414862000  |  |
| 7  | 3.872684000  |              | -5.357086000 |                                       | 1.257525000  |  |
| 7  | 3.617582000  |              | -5.582367000 |                                       | -1.576765000 |  |
| 7  | 0.955599000  |              | -4.529653000 |                                       | -1.421074000 |  |
| 6  | -0.065568000 |              | -3.806848000 |                                       | 1.299307000  |  |
| 6  | -0.590134000 |              | -3.441592000 |                                       | 2.611085000  |  |
| 6  | 0.395036000  |              | -3.756448000 |                                       | 3.499317000  |  |
| 6  | 1.504770000  |              | -4.296558000 |                                       | 2.748606000  |  |
| 6  | 3.803470000  |              | -5.192089000 |                                       | 2.614158000  |  |
| 6  | 5.051002000  |              | -5.594414000 |                                       | 3.227878000  |  |
| 6  | 5.870471000  |              | -6.000058000 |                                       | 2.219514000  |  |
| 6  | 5.123546000  |              | -5.847671000 |                                       | 0.989404000  |  |
| 6  | 4.900493000  |              | -6.047682000 |                                       | -1.461042000 |  |
| 6  | 5.418869000  |              | -6.405289000 |                                       | -2.762690000 |  |
| 6  | 4.430118000  |              | -6.146148000 |                                       | -3.662767000 |  |
| 6  | 3.308872000  |              | -5.627502000 |                                       | -2.910957000 |  |
| 6  | 1.018337000  |              | -4.708660000 |                                       | -2.778571000 |  |
| 6  | -0.216300000 |              | -4.274077000 |                                       | -3.392937000 |  |
| 6  | -1.020508000 |              | -3.828540000 |                                       | -2.382854000 |  |
| 6  | -0.274857000 |              | -3.995715000 |                                       | -1.154906000 |  |
| 6  | -0.760679000 |              | -3.661610000 |                                       | 0.106565000  |  |
| 6  | 2.705122000  |              | -4.707537000 |                                       | 3.316316000  |  |
| 6  | 5.610572000  |              | -6.172275000 |                                       | -0.270921000 |  |
| 6  | 2.103371000  |              | -5.227986000 |                                       | -3.478132000 |  |
| 1  | -1.766756000 |              | -3.258176000 |                                       | 0.152992000  |  |
| 1  | 2.797426000  |              | -4.631515000 |                                       | 4.395426000  |  |
| 1  | 6.623532000  |              | -6.558587000 |                                       | -0.331414000 |  |
| 1  | 2.002466000  |              | -5.325006000 |                                       | -4.555093000 |  |
| 1  | 0.383415000  |              | -3.629984000 |                                       | 4.575411000  |  |
| 1  | 5.251878000  |              | -5.561750000 |                                       | 4.291409000  |  |
| 1  | 6.885719000  |              | -6.371754000 |                                       | 2.281208000  |  |
| 1  | 6.410277000  |              | -6.801993000 |                                       | -2.942947000 |  |
| 1  | 4.440164000  |              | -6.284548000 |                                       | -4.736818000 |  |
| 1  | -0.428614000 |              | -4.322688000 |                                       | -4.453869000 |  |
| 1  | -2.031745000 |              | -3.444864000 |                                       | -2.443713000 |  |
| 6  | -1.924600000 |              | -2.816005000 |                                       | 2.903945000  |  |
| 6  | -2.012487000 |              | -1.330764000 |                                       | 2.500835000  |  |
| 6  | -3.258386000 |              | -0.618683000 |                                       | 3.033049000  |  |
| 8  | -3.540653000 |              | 0.529960000  |                                       | 2.501994000  |  |
| 8  | -3.919230000 |              | -1.138933000 |                                       | 3.953985000  |  |
| 1  | -2.125405000 |              | -2.891707000 |                                       | 3.976532000  |  |
| 1  | -2.729238000 |              | -3.370245000 |                                       | 2.402605000  |  |
| 1  | -1.134101000 |              | -0.790957000 |                                       | 2.882128000  |  |
| 1  | -1.979136000 |              | -1.212020000 |                                       | 1.411990000  |  |
| 16 | 1.538375000  |              | -7.233550000 |                                       | 0.195505000  |  |
| 1  | 2.707093000  |              | -7.894440000 |                                       | 0.032461000  |  |
| 8  | 3.036184000  |              | -3.337632000 |                                       | -0.256536000 |  |
| 7  | 2.919084000  |              | 1.295120000  |                                       | 1.690951000  |  |
| 1  | 3.861016000  |              | 1.424533000  |                                       | 1.335123000  |  |
| 1  | 2.400111000  |              | 2.152437000  |                                       | 1.856026000  |  |
| 6  | 2.594044000  |              | 0.237652000  |                                       | 2.483161000  |  |
| 8  | 1.529698000  |              | 0.192632000  |                                       | 3.110344000  |  |
| 6  | 3.584431000  |              | 0.923887000  |                                       | 2.524158000  |  |
| 1  | 3.306064000  |              | -1.537616000 |                                       | 3.383293000  |  |
| 1  | 3.439141000  |              | -1.538914000 |                                       | 1.626065000  |  |
| 6  | 5.070682000  |              | -0.528142000 |                                       | 2.624419000  |  |
| 1  | 5.410272000  |              | 0.001353000  |                                       | 1.729989000  |  |
| 1  | 5.658966000  |              | -1.451884000 |                                       | 2.685020000  |  |
| 6  | 5.381985000  |              | 0.269293000  |                                       | 3.889219000  |  |
| 8  | 5.134097000  |              | -0.168638000 |                                       | 5.014632000  |  |
| 7  | 5.970438000  |              | 1.485141000  |                                       | 3.696063000  |  |
| 1  | 6.083422000  |              | 1.839842000  |                                       | 2.746547000  |  |
| 6  | 6.397128000  |              | 2.286734000  |                                       | 4.826708000  |  |
| 1  | 6.838560000  |              | 1.642001000  |                                       | 5.589577000  |  |
| 1  | 7.165699000  |              | 2.988228000  |                                       | 4.484439000  |  |
| 6  | 5.297210000  |              | 3.094924000  |                                       | 5.537678000  |  |
| 8  | 5.369941000  |              | 3.334558000  |                                       | 6.744136000  |  |
| 7  | 4.305390000  |              | 3.562834000  |                                       | 4.741803000  |  |
| 1  | 4.241790000  |              | 3.250059000  |                                       | 3.779023000  |  |
| 6  | 3.109724000  |              | 4.198280000  |                                       | 5.265722000  |  |
| 1  | 2.760103000  |              | 3.622073000  |                                       | 6.131901000  |  |
| 6  | 3.338365000  |              | 5.654425000  |                                       | 5.771354000  |  |
| 1  | 4.101097000  |              | 5.579792000  |                                       | 6.551569000  |  |

|   |              |              |              |   |              |             |              |
|---|--------------|--------------|--------------|---|--------------|-------------|--------------|
| 1 | 2.414428000  | 5.984378000  | 6.261837000  | 6 | -7.598906000 | 5.379347000 | -1.308404000 |
| 6 | 3.750299000  | 6.661739000  | 4.721706000  | 1 | -7.738260000 | 6.307007000 | -0.743502000 |
| 6 | 5.106376000  | 6.909099000  | 4.462949000  | 1 | -8.459394000 | 4.730301000 | -1.104481000 |
| 6 | 2.786486000  | 7.382083000  | 3.998280000  | 1 | -7.614279000 | 5.630658000 | -2.375763000 |
| 6 | 5.492397000  | 7.849126000  | 3.504365000  | 6 | -6.280368000 | 4.698441000 | -0.921346000 |
| 6 | 3.168644000  | 8.319432000  | 3.036066000  | 1 | -6.262483000 | 4.492675000 | 0.157097000  |
| 6 | 4.523603000  | 8.556538000  | 2.787474000  | 1 | -5.439294000 | 5.373825000 | -1.122564000 |
| 1 | 5.863364000  | 6.370234000  | 5.027575000  | 6 | -6.049640000 | 3.393322000 | -1.701210000 |
| 1 | 1.729670000  | 7.211062000  | 4.193259000  | 1 | -6.867360000 | 2.683068000 | -1.527282000 |
| 1 | 6.548263000  | 8.033346000  | 3.323035000  | 1 | -6.050779000 | 3.601845000 | -2.775536000 |
| 1 | 2.409996000  | 8.867186000  | 2.483393000  | 7 | -4.768112000 | 2.752480000 | -1.408120000 |
| 1 | 4.820607000  | 9.289337000  | 2.042123000  | 1 | -3.962770000 | 2.996002000 | -2.004412000 |
| 6 | 2.043540000  | 4.108623000  | 4.161530000  | 6 | -4.517539000 | 1.921297000 | -0.392184000 |
| 8 | 2.352458000  | 3.841290000  | 2.993874000  | 7 | -3.268668000 | 1.470590000 | -0.195456000 |
| 7 | 0.768972000  | 4.310743000  | 4.557160000  | 1 | -5.205603000 | 0.978681000 | 1.261751000  |
| 1 | 0.584400000  | 4.678834000  | 5.481587000  | 1 | -6.426881000 | 1.834539000 | 0.375462000  |
| 6 | -0.352528000 | 4.233091000  | 3.639614000  | 7 | -5.495085000 | 1.452766000 | 0.410270000  |
| 1 | 0.045503000  | 4.362587000  | 2.627503000  | 1 | -3.110823000 | 0.990686000 | 0.693848000  |
| 6 | -0.995944000 | 2.820968000  | 3.688353000  | 1 | -2.495391000 | 2.043649000 | -0.561946000 |
| 1 | -0.174714000 | 2.107326000  | 3.535564000  | 6 | -8.716204000 | 6.935031000 | -6.256526000 |
| 8 | -1.896710000 | 2.752366000  | 2.579506000  | 1 | -8.985848000 | 6.036697000 | -6.824089000 |
| 1 | -2.386299000 | 1.898277000  | 2.612887000  | 1 | -9.468069000 | 7.706062000 | -6.463080000 |
| 6 | -1.689118000 | 2.513553000  | 5.017183000  | 1 | -8.770276000 | 6.684333000 | -5.190499000 |
| 1 | -0.981637000 | 2.583726000  | 5.850666000  | 6 | -7.305451000 | 7.423127000 | -6.635468000 |
| 1 | -2.088769000 | 1.493957000  | 5.010443000  | 6 | -6.226123000 | 6.392155000 | -6.373297000 |
| 1 | -2.520300000 | 3.203853000  | 5.199004000  | 6 | -5.540461000 | 6.347507000 | -5.151720000 |
| 6 | -1.304712000 | 5.417279000  | 3.907343000  | 6 | -5.897719000 | 5.423061000 | -7.334134000 |
| 8 | -0.983511000 | 6.340171000  | 4.660810000  | 6 | -4.571491000 | 5.376620000 | -4.887086000 |
| 7 | -2.468158000 | 5.364250000  | 3.216316000  | 6 | -4.936059000 | 4.444871000 | -7.088711000 |
| 1 | -2.648469000 | 4.510847000  | 2.687003000  | 6 | -4.265476000 | 4.409032000 | -5.856995000 |
| 6 | -3.387434000 | 6.481147000  | 3.118528000  | 8 | -3.339283000 | 3.433179000 | -5.660217000 |
| 1 | -2.969012000 | 7.285144000  | 3.728134000  | 1 | -2.998942000 | 3.463231000 | -4.730748000 |
| 6 | -3.536713000 | 6.957243000  | 1.638993000  | 1 | -7.081778000 | 8.339442000 | -6.074176000 |
| 1 | -4.265579000 | 7.779020000  | 1.628787000  | 1 | -7.298688000 | 7.700306000 | -7.697688000 |
| 1 | -3.987910000 | 6.131829000  | 1.075559000  | 1 | -5.758500000 | 7.093362000 | -4.389491000 |
| 6 | -2.251076000 | 7.379473000  | 0.996347000  | 1 | -6.404761000 | 5.434443000 | -8.297191000 |
| 6 | -1.455826000 | 6.605146000  | 0.175785000  | 1 | -4.040114000 | 5.370473000 | -3.939368000 |
| 7 | -0.340775000 | 7.306080000  | -0.216796000 | 1 | -4.690558000 | 3.700628000 | -7.841117000 |
| 1 | -1.603647000 | 5.585283000  | -0.158086000 | 8 | 1.771482000  | 6.223500000 | -1.745907000 |
| 1 | 0.404474000  | 6.954519000  | -0.837338000 | 8 | 3.233446000  | 7.722280000 | -0.939228000 |
| 6 | -1.578108000 | 8.648369000  | 1.123636000  | 6 | 2.863546000  | 6.554282000 | -1.128538000 |
| 6 | -0.381879000 | 8.558943000  | 0.351271000  | 6 | 3.681937000  | 5.381458000 | -0.558059000 |
| 6 | -1.854960000 | 9.850977000  | 1.802814000  | 1 | 3.091285000  | 4.967970000 | 0.273825000  |
| 6 | 0.532992000  | 9.616771000  | 0.255972000  | 1 | 3.742120000  | 4.585263000 | -1.310697000 |
| 6 | -0.955247000 | 10.907032000 | 1.703732000  | 6 | 5.074548000  | 5.764642000 | -0.051643000 |
| 6 | 0.229647000  | 10.789172000 | 0.942221000  | 1 | 4.988732000  | 6.678779000 | 0.542114000  |
| 1 | -2.758880000 | 9.956004000  | 2.399161000  | 1 | 5.723693000  | 6.029081000 | -0.898259000 |
| 1 | -1.160954000 | 11.838622000 | 2.225144000  | 6 | 5.726673000  | 4.686292000 | 0.831556000  |
| 1 | 0.916187000  | 11.630508000 | 0.891962000  | 1 | 5.114712000  | 4.523492000 | 1.724025000  |
| 1 | 1.447341000  | 9.497553000  | -0.319245000 | 1 | 6.706288000  | 5.039797000 | 1.183439000  |
| 6 | -4.774796000 | 6.072703000  | 3.625665000  | 6 | 5.943801000  | 3.312514000 | 0.207307000  |
| 8 | -5.312780000 | 5.027260000  | 3.223861000  | 8 | 5.789238000  | 2.264996000 | 0.867500000  |
| 7 | -5.387703000 | 6.943895000  | 4.452782000  | 7 | 6.335904000  | 3.282602000 | -1.081201000 |
| 1 | -4.872267000 | 7.761871000  | 4.750384000  | 1 | 6.468863000  | 4.162504000 | -1.560116000 |
| 6 | -6.782084000 | 6.824439000  | 4.881914000  | 6 | 6.604158000  | 2.055186000 | -1.822904000 |
| 1 | -7.200248000 | 7.835536000  | 4.907616000  | 1 | 6.288098000  | 2.222360000 | -2.855866000 |
| 1 | -7.312611000 | 6.271468000  | 4.103039000  | 1 | 5.977811000  | 1.269910000 | -1.394787000 |
| 6 | -6.970195000 | 6.165381000  | 6.259159000  | 6 | 8.085403000  | 1.622129000 | -1.771838000 |
| 1 | -6.428033000 | 6.754795000  | 7.008939000  | 1 | 8.162420000  | 0.658044000 | -2.289967000 |
| 1 | -8.035746000 | 6.241442000  | 6.516593000  | 1 | 8.358471000  | 1.448530000 | -0.724731000 |
| 6 | -6.518995000 | 4.699406000  | 6.359269000  | 6 | 9.027845000  | 2.625972000 | -2.401398000 |
| 1 | -6.614526000 | 4.374156000  | 7.402948000  | 6 | 9.251264000  | 2.626712000 | -3.786960000 |
| 1 | -5.456348000 | 4.612527000  | 6.102453000  | 6 | 9.669556000  | 3.601185000 | -1.624065000 |
| 6 | -7.336954000 | 3.747937000  | 5.471954000  | 6 | 10.088547000 | 3.574066000 | -4.379169000 |
| 1 | -8.403408000 | 3.837222000  | 5.705289000  | 6 | 10.507916000 | 4.552012000 | -2.212107000 |
| 1 | -7.216332000 | 3.999080000  | 4.416827000  | 6 | 10.719777000 | 4.541828000 | -3.592621000 |
| 7 | -6.982119000 | 2.340099000  | 5.650997000  | 1 | 8.766447000  | 1.874761000 | -4.406067000 |
| 1 | -7.345306000 | 1.884902000  | 6.477515000  | 1 | 9.514501000  | 3.611149000 | -0.547763000 |
| 6 | -6.044773000 | 1.654972000  | 4.962161000  | 1 | 10.251166000 | 3.554197000 | -5.453727000 |
| 7 | -5.353271000 | 2.212064000  | 3.966660000  | 1 | 10.997568000 | 5.297441000 | -1.590729000 |
| 1 | -5.358953000 | 3.215592000  | 3.785657000  | 1 | 11.373961000 | 5.278312000 | -4.051541000 |
| 1 | -4.672767000 | 1.628645000  | 3.458270000  | 7 | 1.0144418000 | 3.770817000 | -2.277262000 |
| 7 | -5.820833000 | 0.373273000  | 5.278566000  | 1 | 0.624570000  | 3.375240000 | -1.404456000 |
| 1 | -6.451065000 | -0.105504000 | 5.905501000  | 1 | 1.767398000  | 3.156188000 | -2.611917000 |
| 1 | -5.126851000 | -0.193931000 | 4.750988000  | 1 | 1.416601000  | 4.762127000 | -2.044051000 |





|    |              |              |              |   |              |              |              |
|----|--------------|--------------|--------------|---|--------------|--------------|--------------|
| 6  | 1.076472000  | -4.160284000 | -4.429479000 | 1 | -1.907007000 | -1.955761000 | 1.764949000  |
| 6  | 0.858347000  | -4.416372000 | -3.077193000 | 6 | -1.406117000 | -2.319208000 | 4.163157000  |
| 6  | 4.674081000  | -2.753026000 | -0.615786000 | 1 | -0.932317000 | -2.321567000 | 5.150556000  |
| 6  | 6.811641000  | -1.584479000 | -4.805462000 | 1 | -1.262912000 | -3.310679000 | 3.720929000  |
| 6  | 2.856878000  | -2.956656000 | -7.249428000 | 1 | -2.481275000 | -2.153078000 | 4.288568000  |
| 1  | -0.071176000 | -4.915292000 | -2.822573000 | 6 | -2.275128000 | 0.668905000  | 4.234236000  |
| 1  | 4.949157000  | -2.688882000 | 0.431774000  | 8 | -2.526863000 | 1.235190000  | 5.306752000  |
| 1  | 7.778217000  | -1.173576000 | -5.082375000 | 7 | -3.180464000 | 0.463808000  | 3.258493000  |
| 1  | 2.548642000  | -2.941832000 | -8.289687000 | 1 | -2.821913000 | 0.000298000  | 2.423417000  |
| 1  | 2.668608000  | -3.816360000 | 1.130921000  | 6 | -4.465176000 | 1.147943000  | 3.203355000  |
| 1  | 7.313050000  | -1.721172000 | -0.215628000 | 1 | -4.351674000 | 2.095926000  | 3.739341000  |
| 1  | 8.520573000  | -1.097102000 | -2.565893000 | 6 | -4.830021000 | 1.432934000  | 1.723569000  |
| 1  | 7.096179000  | -1.158822000 | -7.618956000 | 1 | -5.754752000 | 2.023048000  | 1.714280000  |
| 1  | 4.869218000  | -1.892920000 | -8.985746000 | 1 | -5.065417000 | 0.479159000  | 1.238459000  |
| 1  | 0.268127000  | -4.112957000 | -7.647689000 | 6 | -3.716210000 | 2.140763000  | 1.001040000  |
| 1  | -0.825468000 | -4.962584000 | -5.314468000 | 6 | -2.732572000 | 1.546874000  | 0.235602000  |
| 6  | 0.187137000  | -4.926746000 | -0.031750000 | 7 | -1.790623000 | 2.471629000  | -0.154019000 |
| 6  | -0.969751000 | -3.909694000 | -0.015143000 | 1 | -2.624901000 | 0.510352000  | -0.056575000 |
| 6  | -2.132755000 | -4.217555000 | 0.930489000  | 1 | -0.873506000 | 2.251370000  | -0.572203000 |
| 8  | -2.940340000 | -3.221978000 | 1.126070000  | 6 | -3.351058000 | 3.533075000  | 1.102772000  |
| 8  | -2.251165000 | -5.332424000 | 1.476127000  | 6 | -2.133764000 | 3.696020000  | 0.375798000  |
| 1  | 0.397052000  | -5.241696000 | 0.995835000  | 6 | -3.917988000 | 4.658571000  | 1.732011000  |
| 1  | -0.117282000 | -5.829979000 | -0.574526000 | 6 | -1.476887000 | 4.930091000  | 0.276913000  |
| 1  | -0.585646000 | -2.923958000 | 0.269575000  | 6 | -3.272362000 | 5.886727000  | 1.632479000  |
| 1  | -1.380510000 | -3.775973000 | -1.023885000 | 6 | -2.061594000 | 6.020721000  | 0.914973000  |
| 16 | 4.762239000  | -5.090815000 | -4.044131000 | 1 | -4.848428000 | 4.572780000  | 2.288979000  |
| 1  | 4.738927000  | -5.260482000 | -5.385914000 | 1 | -3.703295000 | 6.760634000  | 2.114430000  |
| 8  | 3.045969000  | -1.168364000 | -3.810177000 | 1 | -1.580191000 | 6.993626000  | 0.858829000  |
| 7  | 3.890900000  | -0.940571000 | 2.788797000  | 1 | -0.542072000 | 5.016676000  | -0.271202000 |
| 1  | 4.688019000  | -0.314957000 | 2.721374000  | 6 | -5.531454000 | 0.293288000  | 3.920573000  |
| 1  | 2.981122000  | -0.491921000 | 2.751643000  | 8 | -6.155538000 | -0.606955000 | 3.335499000  |
| 6  | 3.950905000  | -2.158931000 | 3.380963000  | 7 | -5.712560000 | 0.598334000  | 5.223511000  |
| 8  | 2.938364000  | -2.831340000 | 3.605532000  | 1 | -5.056826000 | 1.251305000  | 5.638635000  |
| 6  | 5.341241000  | -2.707669000 | 3.709071000  | 6 | -6.698105000 | -0.047644000 | 6.088317000  |
| 1  | 5.200135000  | -3.445963000 | 4.502033000  | 1 | -7.192116000 | 0.736964000  | 6.671681000  |
| 1  | 5.704478000  | -3.251362000 | 2.827160000  | 1 | -7.450272000 | -0.488109000 | 5.430658000  |
| 6  | 6.403432000  | -1.680508000 | 4.139547000  | 6 | -6.117738000 | -1.096698000 | 7.054829000  |
| 1  | 6.607725000  | -0.949942000 | 3.351469000  | 1 | -5.403075000 | -0.602093000 | 7.724569000  |
| 1  | 7.341662000  | -2.219414000 | 4.319166000  | 1 | -6.942005000 | -1.449271000 | 7.689907000  |
| 6  | 6.038494000  | -0.995245000 | 5.454313000  | 6 | -5.418890000 | -2.293073000 | 6.392471000  |
| 8  | 5.795568000  | -1.640893000 | 6.475877000  | 1 | -4.953433000 | -2.906981000 | 7.173467000  |
| 7  | 6.020654000  | 0.367468000  | 5.433223000  | 1 | -4.603167000 | -1.935113000 | 5.752615000  |
| 1  | 6.119246000  | 0.857262000  | 4.545366000  | 6 | -6.360241000 | -3.185102000 | 5.567076000  |
| 6  | 5.735807000  | 1.116232000  | 6.641476000  | 1 | -7.165939000 | -3.574406000 | 6.197258000  |
| 6  | 6.254989000  | 0.662147000  | 7.487778000  | 1 | -6.834565000 | -2.619217000 | 4.762129000  |
| 1  | 6.114350000  | 2.136152000  | 6.514893000  | 7 | -5.685716000 | -4.348402000 | 4.985027000  |
| 6  | 4.254854000  | 1.206574000  | 7.045314000  | 1 | -5.558741000 | -5.145832000 | 5.593506000  |
| 8  | 3.932087000  | 1.314809000  | 8.229599000  | 6 | -4.931288000 | -4.327229000 | 3.864949000  |
| 7  | 3.362575000  | 1.226064000  | 6.025812000  | 7 | -4.947876000 | -3.290370000 | 3.027760000  |
| 1  | 3.668482000  | 1.061442000  | 5.073552000  | 1 | -5.439839000 | -2.422660000 | 3.235288000  |
| 6  | 1.928851000  | 1.220094000  | 6.246368000  | 1 | -4.242779000 | -3.278643000 | 2.265766000  |
| 1  | 1.699292000  | 0.476114000  | 7.019454000  | 7 | -4.194722000 | -5.404335000 | 3.547643000  |
| 6  | 1.373597000  | 2.583761000  | 6.769137000  | 1 | -4.066102000 | -6.136463000 | 4.231331000  |
| 1  | 1.938127000  | 2.802347000  | 7.679944000  | 1 | -3.526431000 | -5.375427000 | 2.753335000  |
| 1  | 0.331701000  | 2.423922000  | 7.070520000  | 6 | -7.754286000 | 1.864151000  | -3.465569000 |
| 6  | 1.452426000  | 3.741046000  | 5.798937000  | 1 | -7.941743000 | 2.854631000  | -3.037996000 |
| 6  | 2.604239000  | 4.537837000  | 5.720357000  | 1 | -8.660775000 | 1.262143000  | -3.325626000 |
| 6  | 0.367851000  | 4.047969000  | 4.962154000  | 1 | -7.598897000 | 1.989539000  | -4.543800000 |
| 6  | 2.675310000  | 5.606163000  | 4.823234000  | 6 | -6.537636000 | 1.207436000  | -2.805359000 |
| 6  | 0.435168000  | 5.114020000  | 4.062157000  | 1 | -6.694124000 | 1.125756000  | -1.722031000 |
| 6  | 1.591504000  | 5.895809000  | 3.989437000  | 1 | -5.650790000 | 1.836270000  | -2.947610000 |
| 1  | 3.445821000  | 4.325767000  | 6.374839000  | 6 | -6.250937000 | -0.184148000 | -3.390688000 |
| 1  | -0.539654000 | 3.450716000  | 5.022984000  | 1 | -7.113815000 | -0.849543000 | -3.256700000 |
| 1  | 3.573562000  | 6.216917000  | 4.781540000  | 1 | -6.096167000 | -0.105668000 | -4.471299000 |
| 1  | -0.413366000 | 5.336171000  | 3.420408000  | 7 | -5.050174000 | -0.823708000 | -2.854156000 |
| 1  | 1.643619000  | 6.730041000  | 3.294916000  | 1 | -4.157177000 | -0.607870000 | -3.327930000 |
| 6  | 1.259693000  | 8.023920000  | 4.935532000  | 6 | -4.964890000 | -1.490654000 | -1.697453000 |
| 8  | 1.853912000  | 0.881070000  | 3.854376000  | 7 | -3.801850000 | -2.017841000 | -1.324544000 |
| 7  | -0.014290000 | 0.363824000  | 5.045432000  | 1 | -6.022931000 | -2.355693000 | -0.187127000 |
| 1  | -0.509837000 | 0.485891000  | 5.922302000  | 1 | -6.963094000 | -1.394228000 | -1.237926000 |
| 6  | -0.855588000 | 0.189430000  | 3.877519000  | 7 | -6.045932000 | -1.627200000 | -0.887458000 |
| 1  | -0.480152000 | 0.855290000  | 3.091040000  | 1 | -3.645241000 | -2.425401000 | -0.394900000 |
| 6  | -0.774848000 | -1.244928000 | 3.281749000  | 1 | -2.967799000 | -1.882755000 | -1.920563000 |
| 1  | 0.294323000  | -1.470063000 | 3.171735000  | 6 | -5.542199000 | 7.425458000  | -3.083321000 |
| 8  | -1.365770000 | -1.155955000 | 1.980365000  | 1 | -6.100573000 | 7.396009000  | -4.026464000 |



|   |              |              |              |   |              |              |              |
|---|--------------|--------------|--------------|---|--------------|--------------|--------------|
| 7 | 4.115595000  | 4.415442000  | 4.930205000  | 7 | -5.287088000 | 1.934472000  | 4.239062000  |
| 1 | 4.108105000  | 3.908553000  | 4.051445000  | 1 | -5.418284000 | 2.894280000  | 3.920925000  |
| 6 | 2.843893000  | 5.006065000  | 5.307015000  | 1 | -4.583266000 | 1.358475000  | 3.749837000  |
| 1 | 2.515178000  | 4.558135000  | 6.253907000  | 7 | -5.325325000 | 0.321569000  | 5.886769000  |
| 6 | 2.907323000  | 6.544153000  | 5.548873000  | 1 | -5.819642000 | -0.125849000 | 6.645142000  |
| 1 | 3.640576000  | 6.688701000  | 6.347121000  | 1 | -4.613958000 | -0.232639000 | 5.372365000  |
| 1 | 1.935845000  | 6.857703000  | 5.950455000  | 6 | -7.878287000 | 3.882734000  | -1.825740000 |
| 6 | 3.262299000  | 7.386566000  | 4.344507000  | 1 | -8.155746000 | 4.872478000  | -1.448086000 |
| 6 | 4.598774000  | 7.712255000  | 4.071060000  | 1 | -8.638171000 | 3.169094000  | -1.484111000 |
| 6 | 2.263599000  | 7.871186000  | 3.484981000  | 1 | -7.921966000 | 3.918947000  | -2.920932000 |
| 6 | 4.931704000  | 8.499491000  | 2.966085000  | 6 | -6.481343000 | 3.484483000  | -1.339167000 |
| 6 | 2.593333000  | 8.654241000  | 2.376666000  | 1 | -6.451222000 | 3.475295000  | -0.242235000 |
| 6 | 3.929127000  | 8.972213000  | 2.115203000  | 1 | -5.743417000 | 4.225533000  | -1.671240000 |
| 1 | 5.380642000  | 7.356719000  | 4.737681000  | 6 | -6.061019000 | 2.105124000  | -1.869610000 |
| 1 | 1.220472000  | 7.637134000  | 3.687823000  | 1 | -6.804217000 | 1.344983000  | -1.599240000 |
| 1 | 5.972288000  | 8.748544000  | 2.774194000  | 1 | -6.029970000 | 2.118171000  | -2.963484000 |
| 1 | 1.808254000  | 9.018773000  | 1.719472000  | 7 | -4.734417000 | 1.680017000  | -1.425576000 |
| 1 | 4.184995000  | 9.583940000  | 1.254456000  | 1 | -3.929488000 | 1.973855000  | -1.998742000 |
| 6 | 1.838747000  | 4.612277000  | 4.212263000  | 6 | -4.446843000 | 1.170796000  | -0.221531000 |
| 8 | 2.219369000  | 4.145195000  | 3.131854000  | 7 | -3.176223000 | 0.987790000  | 0.142160000  |
| 7 | 0.535663000  | 4.778158000  | 4.521355000  | 1 | -5.124511000 | 0.361866000  | 1.505566000  |
| 1 | 0.275750000  | 5.318995000  | 5.336734000  | 1 | -6.357454000 | 0.637948000  | 0.327590000  |
| 6 | -0.525946000 | 4.439160000  | 3.592568000  | 7 | -5.420558000 | 0.824394000  | 0.652121000  |
| 1 | -0.101481000 | 4.465787000  | 2.582979000  | 1 | -3.016007000 | 0.687776000  | 1.108677000  |
| 6 | -1.017262000 | 2.985829000  | 3.828782000  | 1 | -2.429799000 | 1.505901000  | -0.344531000 |
| 1 | -0.121086000 | 2.350775000  | 3.813168000  | 6 | -6.100932000 | 9.430019000  | -4.684066000 |
| 8 | -1.847019000 | 2.663321000  | 2.708805000  | 1 | -6.674607000 | 9.018471000  | -5.522868000 |
| 1 | -2.302163000 | 1.805477000  | 2.871335000  | 1 | -6.334173000 | 10.498644000 | -4.604917000 |
| 6 | -1.737586000 | 2.794343000  | 5.164153000  | 1 | -6.449338000 | 8.937646000  | -3.768628000 |
| 1 | -1.080099000 | 3.062760000  | 5.998202000  | 6 | -4.590978000 | 9.207502000  | -4.887305000 |
| 1 | -2.024005000 | 1.745249000  | 5.294402000  | 6 | -4.213454000 | 7.744654000  | -5.002855000 |
| 1 | -2.645283000 | 3.405359000  | 5.218344000  | 6 | -3.876982000 | 6.988429000  | -3.872115000 |
| 6 | -1.611192000 | 5.532683000  | 3.656236000  | 6 | -4.217805000 | 7.086940000  | -6.242753000 |
| 8 | -1.424990000 | 6.586664000  | 4.271502000  | 6 | -3.558099000 | 5.632322000  | -3.963912000 |
| 7 | -2.728452000 | 5.244374000  | 2.950306000  | 6 | -3.900300000 | 5.734442000  | -6.355218000 |
| 1 | -2.787221000 | 4.305048000  | 2.554873000  | 6 | -3.564809000 | 4.992363000  | -5.213359000 |
| 6 | -3.768587000 | 6.212387000  | 2.663069000  | 8 | -3.258944000 | 3.675252000  | -5.372435000 |
| 1 | -3.453079000 | 7.155499000  | 3.115144000  | 1 | -2.984426000 | 3.279449000  | -4.505974000 |
| 6 | -3.945173000 | 6.394826000  | 1.123458000  | 1 | -4.047516000 | 9.661023000  | -4.048617000 |
| 1 | -4.760543000 | 7.113161000  | 0.964991000  | 1 | -4.270701000 | 9.742334000  | -5.790881000 |
| 1 | -4.288832000 | 5.436163000  | 0.716809000  | 1 | -3.854273000 | 7.466169000  | -2.894461000 |
| 6 | -2.697264000 | 6.842345000  | 0.423285000  | 1 | -4.468444000 | 7.646549000  | -7.142141000 |
| 6 | -1.773615000 | 6.029914000  | -0.204817000 | 1 | -3.295676000 | 5.070417000  | -3.072184000 |
| 7 | -0.723714000 | 6.774927000  | -0.686713000 | 1 | -3.898426000 | 5.238930000  | -7.322124000 |
| 1 | -1.783698000 | 4.954902000  | -0.336554000 | 8 | 1.570130000  | 5.738765000  | -1.959623000 |
| 1 | 0.090332000  | 6.411260000  | -1.205896000 | 8 | 2.907839000  | 7.446561000  | -1.388179000 |
| 6 | -2.178949000 | 8.185065000  | 0.324954000  | 6 | 2.616873000  | 6.241782000  | -1.382752000 |
| 6 | -0.938632000 | 8.097476000  | -0.374980000 | 6 | 3.483457000  | 5.236871000  | -0.600140000 |
| 6 | -2.625449000 | 9.451440000  | 0.750961000  | 1 | 2.904485000  | 4.957986000  | 0.293622000  |
| 6 | -0.144241000 | 9.221370000  | -0.642282000 | 1 | 3.585503000  | 4.316962000  | -1.189503000 |
| 6 | -1.845385000 | 10.570558000 | 0.480273000  | 6 | 4.853291000  | 5.770092000  | -0.171977000 |
| 6 | -0.614537000 | 10.456138000 | -0.205239000 | 1 | 4.719995000  | 6.770465000  | 0.249591000  |
| 1 | -3.567280000 | 9.557036000  | 1.285149000  | 1 | 5.496390000  | 5.909930000  | -1.052446000 |
| 1 | -2.182588000 | 11.551538000 | 0.805745000  | 6 | 5.550701000  | 4.901461000  | 0.890016000  |
| 1 | -0.024931000 | 11.349660000 | -0.393773000 | 1 | 4.941311000  | 4.873204000  | 1.798709000  |
| 1 | 0.807470000  | 9.109920000  | -1.155310000 | 1 | 6.508525000  | 5.361761000  | 1.171553000  |
| 6 | -5.098657000 | 5.739091000  | 3.262551000  | 6 | 5.845419000  | 3.448642000  | 0.532277000  |
| 8 | -5.511061000 | 4.585557000  | 3.060093000  | 8 | 5.796395000  | 2.547492000  | 1.395146000  |
| 7 | -5.797608000 | 6.659631000  | 3.957602000  | 7 | 6.185307000  | 3.189204000  | -0.744508000 |
| 1 | -5.377901000 | 7.568167000  | 4.104088000  | 1 | 6.233441000  | 3.964723000  | -1.391105000 |
| 6 | -7.138915000 | 6.433010000  | 4.494452000  | 6 | 6.520426000  | 1.863405000  | -1.255762000 |
| 1 | -7.701116000 | 7.364222000  | 4.372568000  | 1 | 6.056528000  | 1.765669000  | -2.241089000 |
| 1 | -7.614487000 | 5.677922000  | 3.864224000  | 1 | 6.063324000  | 1.132178000  | -0.586376000 |
| 6 | -7.158521000 | 6.019915000  | 5.976090000  | 6 | 8.039777000  | 1.611131000  | -1.341660000 |
| 1 | -6.658231000 | 6.799794000  | 6.563536000  | 1 | 8.178495000  | 0.577527000  | -1.684131000 |
| 1 | -8.207437000 | 6.012109000  | 6.303732000  | 1 | 8.462503000  | 1.675203000  | -0.332487000 |
| 6 | -6.509198000 | 4.664159000  | 6.297143000  | 6 | 8.761897000  | 2.566502000  | -2.269667000 |
| 1 | -6.463373000 | 4.546412000  | 7.387186000  | 6 | 8.664939000  | 2.421166000  | -3.662853000 |
| 1 | -5.473090000 | 4.646979000  | 5.938960000  | 6 | 9.519313000  | 3.631925000  | -1.763220000 |
| 6 | -7.274816000 | 3.468318000  | 5.709460000  | 6 | 9.306587000  | 3.313343000  | -4.523260000 |
| 1 | -8.311960000 | 3.475666000  | 6.061610000  | 6 | 10.164112000 | 4.527637000  | -2.621005000 |
| 1 | -7.307745000 | 3.519726000  | 4.619330000  | 6 | 10.059654000 | 4.371004000  | -4.004494000 |
| 7 | -6.707522000 | 2.173305000  | 6.087074000  | 1 | 8.079690000  | 1.602503000  | -4.075634000 |
| 1 | -6.896795000 | 1.851192000  | 7.026661000  | 1 | 9.609576000  | 3.757070000  | -0.686607000 |
| 6 | -5.768331000 | 1.489670000  | 5.399865000  | 1 | 9.221449000  | 3.181358000  | -5.598807000 |







|    |              |              |              |   |              |              |              |
|----|--------------|--------------|--------------|---|--------------|--------------|--------------|
| 6  | 7.347146000  | -3.287852000 | -6.724527000 | 1 | -0.382575000 | 0.781220000  | 5.728348000  |
| 6  | 6.170288000  | -2.964504000 | -7.330246000 | 6 | -0.842766000 | 0.528523000  | 3.683964000  |
| 6  | 5.118136000  | -3.276983000 | -6.389018000 | 1 | -0.430848000 | 1.099767000  | 2.844999000  |
| 6  | 2.733839000  | -3.404648000 | -5.756035000 | 6 | -0.874088000 | -0.954967000 | 3.230364000  |
| 6  | 1.327855000  | -3.221463000 | -6.044828000 | 1 | 0.172305000  | -1.261480000 | 3.096657000  |
| 6  | 0.644211000  | -3.682672000 | -4.960826000 | 8 | -1.537025000 | -0.959068000 | 1.963973000  |
| 6  | 1.632234000  | -4.133944000 | -4.005412000 | 1 | -1.713249000 | -1.886710000 | 1.683324000  |
| 6  | 1.327823000  | -4.649474000 | -2.748616000 | 6 | -1.534120000 | -1.889909000 | 4.244470000  |
| 6  | 5.516489000  | -5.564121000 | -0.505031000 | 1 | -1.012836000 | -1.843207000 | 5.206854000  |
| 6  | 7.948831000  | -4.211378000 | -4.469968000 | 1 | -1.486590000 | -2.926302000 | 3.893705000  |
| 6  | 3.761969000  | -3.083636000 | -6.634723000 | 1 | -2.587067000 | -1.630304000 | 4.399261000  |
| 1  | 0.275778000  | -4.742013000 | -2.500018000 | 6 | -2.212638000 | 1.146818000  | 4.028340000  |
| 1  | 5.795590000  | -5.935724000 | 0.476347000  | 8 | -2.380082000 | 1.802812000  | 5.061238000  |
| 1  | 8.996730000  | -4.162191000 | -4.750488000 | 7 | -3.160848000 | 0.944160000  | 3.085240000  |
| 1  | 3.479630000  | -2.654656000 | -7.591042000 | 1 | -2.919844000 | 0.297582000  | 2.332906000  |
| 1  | 3.271708000  | -6.126489000 | 1.168535000  | 6 | -4.458062000 | 1.593276000  | 3.093412000  |
| 1  | 8.342705000  | -5.818584000 | -0.159405000 | 1 | -4.432621000 | 2.335177000  | 3.894982000  |
| 1  | 9.706209000  | -5.073271000 | -2.384611000 | 6 | -4.739442000 | 2.291374000  | 1.729035000  |
| 1  | 8.354280000  | -3.198130000 | -7.112561000 | 1 | -5.743961000 | 2.731988000  | 1.785746000  |
| 1  | 6.009857000  | -2.558948000 | -8.321612000 | 1 | -4.784869000 | 1.509107000  | 0.962038000  |
| 1  | 0.941486000  | -2.791896000 | -6.960220000 | 6 | -3.722834000 | 3.327447000  | 1.358390000  |
| 1  | -0.426352000 | -3.715118000 | -4.800365000 | 6 | -2.651237000 | 3.153210000  | 0.506354000  |
| 6  | 0.533414000  | -5.665116000 | 0.113736000  | 7 | -1.894749000 | 4.299023000  | 0.442866000  |
| 6  | -0.109202000 | -4.312000000 | 0.477752000  | 1 | -2.358692000 | 2.276647000  | -0.058333000 |
| 6  | -1.492478000 | -4.427230000 | 1.118278000  | 1 | -1.044190000 | 4.422720000  | -0.124168000 |
| 8  | -2.282440000 | -3.410365000 | 0.961140000  | 6 | -3.618615000 | 4.675033000  | 1.861783000  |
| 8  | -1.790908000 | -5.440745000 | 1.780290000  | 6 | -2.455044000 | 5.247728000  | 1.267331000  |
| 1  | 0.573648000  | -6.287176000 | 1.012969000  | 6 | -4.378676000 | 5.459203000  | 2.751767000  |
| 1  | -0.118004000 | -6.190820000 | -0.597117000 | 6 | -2.032138000 | 6.553951000  | 1.550280000  |
| 1  | 0.539266000  | -3.782631000 | 1.191393000  | 6 | -3.968994000 | 6.759316000  | 3.027232000  |
| 1  | -0.178980000 | -3.666202000 | -0.403174000 | 6 | -2.803878000 | 7.299199000  | 2.436644000  |
| 16 | 4.540417000  | -6.690730000 | -4.468242000 | 1 | -5.273974000 | 5.056410000  | 3.220562000  |
| 1  | 5.803596000  | -6.758107000 | -4.947454000 | 1 | -4.549016000 | 7.371342000  | 3.713494000  |
| 8  | 4.698102000  | -2.769883000 | -2.965580000 | 1 | -2.505325000 | 8.315586000  | 2.680543000  |
| 7  | 3.400071000  | -0.705352000 | 1.858890000  | 1 | -1.121254000 | 6.942678000  | 1.103759000  |
| 1  | 4.234634000  | -0.142842000 | 1.726876000  | 6 | -5.563517000 | 0.560027000  | 3.344183000  |
| 1  | 2.558894000  | -0.172651000 | 2.057046000  | 8 | -5.645820000 | -0.461787000 | 2.643806000  |
| 6  | 3.455155000  | -1.957894000 | 2.382058000  | 7 | -6.453042000 | 0.862934000  | 4.310711000  |
| 8  | 2.443980000  | -2.555399000 | 2.767164000  | 1 | -6.298296000 | 1.698412000  | 4.859588000  |
| 6  | 4.827070000  | -2.632163000 | 2.424265000  | 6 | -7.641441000 | 0.062354000  | 4.601816000  |
| 1  | 4.744289000  | -3.454273000 | 3.138938000  | 1 | -8.447745000 | 0.756247000  | 4.859009000  |
| 1  | 5.017394000  | -3.076764000 | 1.438786000  | 1 | -7.925099000 | -0.441427000 | 3.674793000  |
| 6  | 6.013414000  | -1.729092000 | 2.810263000  | 6 | -7.452096000 | -0.941995000 | 5.750630000  |
| 1  | 6.153638000  | -0.912142000 | 2.096893000  | 1 | -7.156043000 | -0.390055000 | 6.651522000  |
| 1  | 6.925884000  | -2.336553000 | 2.772388000  | 1 | -8.434923000 | -1.382651000 | 5.969430000  |
| 6  | 5.904589000  | -1.205274000 | 4.241461000  | 6 | -6.433059000 | -2.062435000 | 5.498141000  |
| 8  | 5.770849000  | -1.966173000 | 5.201881000  | 1 | -6.298715000 | -2.629641000 | 6.427887000  |
| 7  | 5.993544000  | 0.147530000  | 4.392387000  | 1 | -5.453903000 | -1.636105000 | 5.250306000  |
| 1  | 5.993854000  | 0.744921000  | 3.566385000  | 6 | -6.864097000 | -3.036033000 | 4.391486000  |
| 6  | 5.982326000  | 0.742206000  | 5.715814000  | 1 | -7.843466000 | -3.465598000 | 4.627756000  |
| 1  | 6.578220000  | 0.131828000  | 6.397123000  | 1 | -6.962980000 | -2.523131000 | 3.432759000  |
| 1  | 6.440857000  | 1.735008000  | 5.654217000  | 7 | -5.940215000 | -4.156321000 | 4.217641000  |
| 6  | 4.598745000  | 0.895294000  | 6.373529000  | 1 | -5.985610000 | -4.891779000 | 4.910381000  |
| 8  | 4.470410000  | 0.845141000  | 7.597850000  | 6 | -4.865203000 | -4.173540000 | 3.401475000  |
| 7  | 3.577118000  | 1.147656000  | 5.521510000  | 7 | -4.585631000 | -3.158285000 | 2.584994000  |
| 1  | 3.728203000  | 1.079884000  | 4.520549000  | 1 | -5.011714000 | -2.237420000 | 2.686432000  |
| 6  | 2.185313000  | 1.172081000  | 5.931505000  | 1 | -3.750951000 | -3.240333000 | 1.982971000  |
| 1  | 1.993664000  | 0.311396000  | 6.585100000  | 7 | -4.076374000 | -5.257866000 | 3.393144000  |
| 6  | 1.789498000  | 2.442021000  | 6.744440000  | 1 | -4.383786000 | -6.102944000 | 3.852560000  |
| 1  | 2.456145000  | 2.458868000  | 7.611258000  | 1 | -3.255190000 | -5.320894000 | 2.759769000  |
| 1  | 0.774393000  | 2.287612000  | 7.129993000  | 6 | -7.953612000 | 0.052560000  | -2.415894000 |
| 6  | 1.860655000  | 3.754143000  | 5.994759000  | 1 | -8.584134000 | 0.589885000  | -1.699734000 |
| 6  | 3.034434000  | 4.521831000  | 6.009603000  | 1 | -8.357410000 | -0.961730000 | -2.522744000 |
| 6  | 0.752155000  | 4.237513000  | 5.280685000  | 1 | -8.048049000 | 0.554220000  | -3.386513000 |
| 6  | 3.103208000  | 5.738347000  | 5.326522000  | 6 | -6.494801000 | 0.024028000  | -1.943793000 |
| 6  | 0.818959000  | 5.451082000  | 4.592479000  | 1 | -6.427333000 | -0.462677000 | -0.962779000 |
| 6  | 1.995300000  | 6.205833000  | 4.614234000  | 1 | -6.119833000 | 1.047180000  | -1.815417000 |
| 1  | 3.894885000  | 4.168382000  | 6.572397000  | 6 | -5.580085000 | -0.709444000 | -2.937954000 |
| 1  | -0.171254000 | 3.662227000  | 5.267058000  | 1 | -5.967531000 | -1.714810000 | -3.147715000 |
| 1  | 4.018858000  | 6.323410000  | 5.356470000  | 1 | -5.573444000 | -0.185310000 | -3.898237000 |
| 1  | -0.047184000 | 5.809614000  | 4.042356000  | 7 | -4.184253000 | -0.798875000 | -2.509524000 |
| 1  | 2.045275000  | 7.152653000  | 4.083410000  | 1 | -3.531827000 | -0.069539000 | -2.831204000 |
| 6  | 1.352680000  | 1.006866000  | 4.648868000  | 6 | -3.707892000 | -1.662094000 | -1.604031000 |
| 8  | 1.872258000  | 1.128320000  | 3.532011000  | 7 | -2.443261000 | -1.581550000 | -1.194128000 |
| 7  | 0.048778000  | 0.703503000  | 4.815391000  | 1 | -4.031167000 | -3.316763000 | -0.484565000 |



|   |              |              |              |   |              |              |              |
|---|--------------|--------------|--------------|---|--------------|--------------|--------------|
| 7 | 6.024686000  | 0.394355000  | 5.420082000  | 1 | -4.603637000 | -1.935872000 | 5.752613000  |
| 1 | 6.118218000  | 0.885404000  | 4.532503000  | 6 | -6.361306000 | -3.184798000 | 5.566036000  |
| 6 | 5.737747000  | 1.139864000  | 6.629830000  | 1 | -7.167531000 | -3.573926000 | 6.195636000  |
| 1 | 6.262717000  | 0.688767000  | 7.474156000  | 1 | -6.834778000 | -2.618475000 | 4.760926000  |
| 1 | 6.108434000  | 2.162672000  | 6.503224000  | 7 | -5.686810000 | -4.348377000 | 4.984184000  |
| 6 | 4.257431000  | 1.219132000  | 7.038246000  | 1 | -5.559721000 | -5.145455000 | 5.593124000  |
| 8 | 3.937772000  | 1.325025000  | 8.223654000  | 6 | -4.931341000 | -4.327246000 | 3.864921000  |
| 7 | 3.361868000  | 1.232009000  | 6.021772000  | 7 | -4.947666000 | -3.290943000 | 3.027009000  |
| 1 | 3.665401000  | 1.072685000  | 5.067775000  | 1 | -5.440499000 | -2.423403000 | 3.233376000  |
| 6 | 1.928888000  | 1.220105000  | 6.246333000  | 1 | -4.242521000 | -3.279209000 | 2.265239000  |
| 1 | 1.704239000  | 0.475694000  | 7.020406000  | 7 | -4.193366000 | -5.403966000 | 3.548694000  |
| 6 | 1.369840000  | 2.582376000  | 6.768878000  | 1 | -4.063620000 | -6.134819000 | 4.233560000  |
| 1 | 1.936128000  | 2.804452000  | 7.677768000  | 1 | -3.521422000 | -5.372511000 | 2.757899000  |
| 1 | 0.329350000  | 2.419508000  | 7.073431000  | 6 | -7.754230000 | 1.864097000  | -3.465545000 |
| 6 | 1.442261000  | 3.737889000  | 5.796036000  | 1 | -7.941016000 | 2.855463000  | -3.039737000 |
| 6 | 2.592929000  | 4.535601000  | 5.709703000  | 1 | -8.660634000 | 1.262504000  | -3.323284000 |
| 6 | 0.353548000  | 4.041276000  | 4.963327000  | 1 | -7.600137000 | 1.987265000  | -4.544213000 |
| 6 | 2.658982000  | 5.600972000  | 4.808712000  | 6 | -6.536823000 | 1.208493000  | -2.805561000 |
| 6 | 0.415900000  | 5.104403000  | 4.059490000  | 1 | -6.691694000 | 1.129067000  | -1.721799000 |
| 6 | 1.571217000  | 5.886841000  | 3.978788000  | 1 | -5.650046000 | 1.836907000  | -2.950273000 |
| 1 | 3.437710000  | 4.326512000  | 6.360996000  | 6 | -6.251049000 | -0.184339000 | -3.388422000 |
| 1 | -0.553163000 | 3.443472000  | 5.030067000  | 1 | -7.113029000 | -0.849979000 | -3.250446000 |
| 1 | 3.556540000  | 6.212286000  | 4.760866000  | 1 | -6.099310000 | -0.108174000 | -4.469664000 |
| 1 | -0.435756000 | 5.323799000  | 3.420942000  | 7 | -5.048524000 | -0.821811000 | -2.853447000 |
| 1 | 1.619516000  | 6.718621000  | 3.281058000  | 1 | -4.156019000 | -0.602165000 | -3.326629000 |
| 6 | 1.258781000  | 0.799121000  | 4.936865000  | 6 | -4.961191000 | -1.494367000 | -1.700459000 |
| 8 | 1.853709000  | 0.871543000  | 3.855701000  | 7 | -3.797783000 | -2.025700000 | -1.333222000 |
| 7 | -0.016777000 | 0.365071000  | 5.047626000  | 1 | -6.017022000 | -2.367225000 | -0.192725000 |
| 1 | -0.512941000 | 0.491336000  | 5.923568000  | 1 | -6.957294000 | -1.392408000 | -1.231790000 |
| 6 | -0.857144000 | 0.190094000  | 3.879180000  | 7 | -6.039855000 | -1.634110000 | -0.888169000 |
| 1 | -0.481726000 | 0.856150000  | 3.092830000  | 1 | -3.638163000 | -2.429783000 | -0.402435000 |
| 6 | -0.774658000 | -1.243955000 | 3.283137000  | 1 | -2.965279000 | -1.888691000 | -1.930492000 |
| 1 | 0.294905000  | -1.467782000 | 3.174033000  | 6 | -5.542191000 | 7.425461000  | -3.083316000 |
| 8 | -1.363781000 | -1.154840000 | 1.981089000  | 1 | -6.111017000 | 7.388551000  | -4.019926000 |
| 1 | -1.907581000 | -1.952922000 | 1.766188000  | 1 | -5.688907000 | 8.415895000  | -2.635881000 |
| 6 | -1.405980000 | -2.319193000 | 4.163297000  | 1 | -5.969777000 | 6.678786000  | -2.403958000 |
| 1 | -0.933037000 | -2.321783000 | 5.151098000  | 6 | -4.047929000 | 7.148696000  | -3.334135000 |
| 1 | -1.262047000 | -3.310352000 | 3.720574000  | 6 | -3.777324000 | 5.793114000  | -3.957244000 |
| 1 | -2.481309000 | -2.153593000 | 4.287939000  | 6 | -3.475957000 | 4.676833000  | -3.165754000 |
| 6 | -2.277508000 | 0.668167000  | 4.234508000  | 6 | -3.834607000 | 5.602738000  | -5.347018000 |
| 8 | -2.531111000 | 1.233307000  | 5.307245000  | 6 | -3.237076000 | 3.419877000  | -3.726458000 |
| 7 | -3.181344000 | 0.462981000  | 3.257416000  | 6 | -3.600981000 | 4.356313000  | -5.925338000 |
| 1 | -2.820631000 | 0.002241000  | 2.421785000  | 6 | -3.297614000 | 3.248618000  | -5.118456000 |
| 6 | -4.466955000 | 1.145408000  | 3.200495000  | 8 | -3.071892000 | 2.055457000  | -5.728724000 |
| 1 | -4.354813000 | 2.095173000  | 3.733688000  | 1 | -2.849297000 | 1.355335000  | -5.061685000 |
| 6 | -4.832975000 | 1.424629000  | 1.719754000  | 1 | -3.507692000 | 7.223950000  | -2.381845000 |
| 1 | -5.755742000 | 2.017776000  | 1.709206000  | 1 | -3.645715000 | 7.937931000  | -3.983162000 |
| 1 | -5.072384000 | 0.469210000  | 1.239927000  | 1 | -3.410119000 | 4.788651000  | -2.085942000 |
| 6 | -3.718028000 | 2.124254000  | 0.991091000  | 1 | -4.058505000 | 6.449944000  | -5.993048000 |
| 6 | -2.740488000 | 1.522161000  | 0.224434000  | 1 | -2.993508000 | 2.573858000  | -3.089834000 |
| 7 | -1.794650000 | 2.439984000  | -0.172142000 | 1 | -3.639402000 | 4.223887000  | -7.003081000 |
| 1 | -2.639553000 | 0.484011000  | -0.064199000 | 8 | 0.862563000  | 1.797844000  | -0.935034000 |
| 1 | -0.878283000 | 2.210616000  | -0.587404000 | 8 | 1.820601000  | 3.812993000  | -1.237470000 |
| 6 | -3.344564000 | 3.514840000  | 1.086601000  | 6 | 1.725606000  | 2.712569000  | -0.656256000 |
| 6 | -2.128855000 | 3.668224000  | 0.354904000  | 6 | 2.699441000  | 2.370960000  | 0.487523000  |
| 6 | -3.902975000 | 4.645533000  | 1.714019000  | 1 | 2.127396000  | 1.902666000  | 1.297703000  |
| 6 | -1.465354000 | 4.898178000  | 0.249735000  | 1 | 3.380680000  | 1.590803000  | 0.115511000  |
| 6 | -3.250656000 | 5.869681000  | 1.608285000  | 6 | 3.488693000  | 3.570445000  | 1.018480000  |
| 6 | -2.041612000 | 5.994233000  | 0.886201000  | 1 | 2.785271000  | 4.334308000  | 1.369054000  |
| 1 | -4.832003000 | 4.566724000  | 2.274373000  | 1 | 4.037685000  | 4.042994000  | 0.194531000  |
| 1 | -3.674923000 | 6.747661000  | 2.088745000  | 6 | 4.421082000  | 3.226187000  | 2.195794000  |
| 1 | -1.554766000 | 6.964138000  | 0.825181000  | 1 | 3.845115000  | 2.760308000  | 3.000073000  |
| 1 | -0.532073000 | 4.977631000  | -0.302035000 | 1 | 4.849075000  | 4.151955000  | 2.605019000  |
| 6 | -5.532476000 | 0.291489000  | 3.920058000  | 6 | 5.583825000  | 2.288903000  | 1.892822000  |
| 8 | -6.157191000 | -0.609385000 | 3.336598000  | 8 | 5.885031000  | 1.347444000  | 2.656774000  |
| 7 | -5.712320000 | 0.597770000  | 5.222820000  | 7 | 6.302462000  | 2.551265000  | 0.785678000  |
| 1 | -5.055611000 | 1.250464000  | 5.636917000  | 1 | 5.984028000  | 3.287155000  | 0.167555000  |
| 6 | -6.697716000 | -0.047152000 | 6.088619000  | 6 | 7.446153000  | 1.756742000  | 0.347383000  |
| 1 | -7.190529000 | 0.738026000  | 6.672229000  | 1 | 7.108530000  | 0.956186000  | -0.323336000 |
| 1 | -7.450821000 | -0.487042000 | 5.431647000  | 1 | 7.873998000  | 1.283637000  | 1.233668000  |
| 6 | -6.117734000 | -1.096686000 | 7.054833000  | 6 | 8.501472000  | 2.626055000  | -0.356514000 |
| 1 | -5.402442000 | -0.602715000 | 7.724362000  | 1 | 9.326669000  | 1.962224000  | -0.643432000 |
| 1 | -6.942014000 | -1.448760000 | 7.690159000  | 1 | 8.906371000  | 3.349942000  | 0.360036000  |
| 6 | -5.419779000 | -2.293493000 | 6.392127000  | 6 | 7.975263000  | 3.356104000  | -1.578484000 |
| 1 | -4.954928000 | -2.907945000 | 7.173057000  | 6 | 7.615555000  | 2.650802000  | -2.738976000 |

|   |              |              |              |
|---|--------------|--------------|--------------|
| 6 | 7.817967000  | 4.749426000  | -1.568526000 |
| 6 | 7.120293000  | 3.321909000  | -3.857662000 |
| 6 | 7.322792000  | 5.425456000  | -2.687842000 |
| 6 | 6.974572000  | 4.712974000  | -3.836206000 |
| 1 | 7.721929000  | 1.568325000  | -2.766650000 |
| 1 | 8.094990000  | 5.311121000  | -0.679111000 |
| 1 | 6.848633000  | 2.759335000  | -4.746993000 |
| 1 | 7.213656000  | 6.506435000  | -2.660903000 |
| 1 | 6.597745000  | 5.237902000  | -4.710046000 |
| 7 | 0.797221000  | -0.270183000 | -2.718220000 |
| 1 | 0.343269000  | -1.106613000 | -2.316649000 |
| 1 | 1.691475000  | -0.596561000 | -3.212304000 |
| 1 | 1.027206000  | 0.396954000  | -1.945161000 |
| 6 | -0.242191000 | 0.358590000  | -3.600441000 |
| 1 | -0.472443000 | 1.332262000  | -3.160388000 |
| 6 | -1.542647000 | -0.470440000 | -3.475242000 |
| 8 | -2.581285000 | -0.004657000 | -4.031743000 |
| 8 | -1.486218000 | -1.516138000 | -2.779873000 |
| 6 | 0.231951000  | 0.543327000  | -5.049713000 |
| 1 | -0.642311000 | 0.810356000  | -5.649564000 |
| 1 | 0.578524000  | -0.421814000 | -5.432916000 |
| 6 | 1.308653000  | 1.595970000  | -5.194638000 |
| 6 | 1.640688000  | 2.506262000  | -4.208237000 |
| 1 | 1.234998000  | 2.652489000  | -3.215714000 |
| 7 | 2.668801000  | 3.309855000  | -4.617888000 |
| 1 | 3.121467000  | 3.992318000  | -4.026700000 |
| 6 | 3.059206000  | 2.942199000  | -5.880770000 |
| 6 | 2.199156000  | 1.870057000  | -6.300604000 |
| 6 | 2.465544000  | 1.366948000  | -7.601956000 |
| 6 | 3.517817000  | 1.859116000  | -8.374668000 |
| 6 | 4.095666000  | 3.462114000  | -6.655484000 |
| 6 | 4.326452000  | 2.901271000  | -7.908291000 |
| 1 | 3.080689000  | -0.850473000 | -4.778840000 |
| 1 | 3.676816000  | 1.436200000  | -9.358188000 |
| 1 | 4.703322000  | 4.281977000  | -6.284644000 |
| 1 | 5.125369000  | 3.280891000  | -8.536763000 |
| 7 | 1.622633000  | 0.365237000  | -8.239337000 |
| 8 | 2.096453000  | -0.299807000 | -9.169317000 |
| 8 | 0.456816000  | 0.245573000  | -7.850653000 |
